# Supplementary material for: SNAP judgments into the digital age: Reporting on food stamps varies significantly with time, publication type, and political leaning
Source: PLoS One. 2020 Feb 21;15(2):e0229180. doi: 10.1371/journal.pone.0229180 (PMC7034891; doi:10.1371/journal.pone.0229180)
Supplement: S4 File — (CSV) [file pone.0229180.s007.csv]

	source2	source	type	section	state	date	year	month	nmonth	documents	check0	check1	check2	check3	check	top_papers	majorYN	url	avg_align	V1	V2	V3	V4	V5	V6	V7	V8	max_topic	max_topic_theta
1	BALTIMORE SUN	The Baltimore Sun	Newspaper	MAIN NEWS	NA	August 17, 2017	2017	8	20	As more activists and organizations join the gro	1	1	1	1	1	TRUE	major_paper	BALTIMORESUN.COM	-0.1321	0.0324151477138252	0.100718890674755	0.376770891741505	0.113771416364765	0.0121586634706251	0.109392646157297	0.1768615090691	0.077910834808128	3	0.376770891741505
2	BALTIMORE SUN	The Baltimore Sun	Newspaper	MAIN NEWS	NA	December 1, 2016	2016	12	36	The union-financed national "Fight for $15" is r	1	0	1	1	1	TRUE	major_paper	BALTIMORESUN.COM	-0.1321	0.0891025739626455	0.235631814214175	0.0471773116002969	0.480753976484035	0.037401957225279	0.00637744550665308	0.0558436534581349	0.0477112675487813	4	0.480753976484035
3	BALTIMORE SUN	The Baltimore Sun	Newspaper	MAIN NEWS	NA	December 10, 2017	2017	12	24	Patriotism may be defined as a belief in the gre	1	0	1	1	1	TRUE	major_paper	BALTIMORESUN.COM	-0.1321	0.386248086253465	0.0145470185993396	0.034726668305731	0.144017735984158	0.0276640102760146	0.0669164083998768	0.319225029305077	0.00665504287633911	1	0.386248086253465
4	BALTIMORE SUN	The Baltimore Sun	Newspaper	MAIN NEWS	NA	November 23, 2017	2017	11	23	HIGHLIGHT: Americans are projected to spend $68	1	0	1	1	1	TRUE	major_paper	BALTIMORESUN.COM	-0.1321	0.00634522214415311	0.0205068180310359	0.0231406214364859	0.72589185012862	0.00452373592810546	0.0502080162774444	0.0390532884478315	0.130330447606323	4	0.72589185012862
5	BALTIMORE SUN	The Baltimore Sun	Newspaper	MAIN NEWS	NA	May 23, 2017	2017	5	17	WASHINGTON - A $4 trillion federal budget propo	1	0	1	1	1	TRUE	major_paper	BALTIMORESUN.COM	-0.1321	0.136554441031033	0.046080789224956	0.113141671523951	0.118591170316978	0.00520309585146824	0.00471134806146977	0.0202005541097753	0.555516929880369	8	0.555516929880369
6	BALTIMORE SUN	The Baltimore Sun	Newspaper	MAIN NEWS	NA	June 22, 2017	2017	6	18	When the Trump administration released its Fisca	1	1	1	1	1	TRUE	major_paper	BALTIMORESUN.COM	-0.1321	0.0676652342760418	0.0106201418281913	0.356841252615377	0.196561009990802	0.00147038960999041	0.0141612776012006	0.0338236845973348	0.318857009481062	3	0.356841252615377
7	BALTIMORE SUN	The Baltimore Sun	Newspaper	MAIN NEWS	NA	December 11, 2016	2016	12	36	HIGHLIGHT: Ban Carson Dr. Ben Carson, Donald T	1	0	1	1	1	TRUE	major_paper	BALTIMORESUN.COM	-0.1321	0.442561479684715	0.163122466983037	0.0198102606857724	0.0402182638273563	0.0512525704040012	0.058697858296796	0.117600860038276	0.106736240080047	1	0.442561479684715
8	BALTIMORE SUN	The Baltimore Sun	Newspaper	MAIN NEWS	NA	September 3, 2017	2017	9	21	HIGHLIGHT: Laura Millikan works two part-time j	1	0	1	1	1	TRUE	major_paper	BALTIMORESUN.COM	-0.1321	0.0761725975177468	0.0198256636201091	0.0617193798252437	0.539454115684755	0.00802932453987858	0.0809600335866931	0.195357250429239	0.0184816347963352	4	0.539454115684755
9	BALTIMORE SUN	The Baltimore Sun	Newspaper	MAIN NEWS	NA	November 9, 2016	2016	11	35	HIGHLIGHT: People gather around Times Square t	1	0	1	1	1	TRUE	major_paper	BALTIMORESUN.COM	-0.1321	0.663743697911185	0.050993018763225	0.0147284434928351	0.0345468012180011	0.083331987880667	0.0109118201414415	0.135184117888266	0.00656011270437847	1	0.663743697911185
10	BALTIMORE SUN	The Baltimore Sun	Newspaper	MAIN NEWS	NA	August 19, 2017	2017	8	20	Molly McGrath Tierney, a fierce child-welfare ad	1	0	1	1	1	TRUE	major_paper	BALTIMORESUN.COM	-0.1321	0.125877355952213	0.392824383240755	0.226368009085592	0.036951619537902	0.0233425427903125	0.0592868657696107	0.124597319885462	0.0107519037381524	2	0.392824383240755
11	BALTIMORE SUN	The Baltimore Sun	Newspaper		NA	April 21, 2016	2016	4	28	HIGHLIGHT: A grocery store employee wipes down	1	1	1	1	1	TRUE	major_paper	BALTIMORESUN.COM	-0.1321	0.272828467376092	0.0420680411511826	0.142515053554625	0.207216964248131	0.00432690374174068	0.007322417354157	0.127441412626512	0.19628073994756	1	0.272828467376092
12	BALTIMORE SUN	The Baltimore Sun	Newspaper	MAIN NEWS	NA	June 3, 2016	2016	6	30	HIGHLIGHT: A woman looks over potatoes at the B	1	1	1	1	1	TRUE	major_paper	BALTIMORESUN.COM	-0.1321	0.0386057998928574	0.0440488015861405	0.550600142863365	0.104150265435898	0.00614733591678732	0.0247581547781447	0.159982067674424	0.0717074318523836	3	0.550600142863365
13	BALTIMORE SUN	The Baltimore Sun	Newspaper	MAIN NEWS	NA	July 16, 2017	2017	7	19	HIGHLIGHT: Sarafina Harper, a volunteer at Bal	1	1	1	1	1	TRUE	major_paper	BALTIMORESUN.COM	-0.1321	0.00487421911853317	0.21826271847849	0.030368772463417	0.0894767804810195	0.0293967414213709	0.118668594030868	0.43984076110818	0.0691114128981214	7	0.43984076110818
14	BALTIMORE SUN	The Baltimore Sun	Newspaper	MAIN NEWS	NA	October 6, 2017	2017	10	22	1 A new greenhouse planned for the rolling hill	1	0	1	1	1	TRUE	major_paper	BALTIMORESUN.COM	-0.1321	0.0130083924888589	0.184923829159456	0.148928829608589	0.0404754979588216	0.159127117494362	0.0778439153013623	0.238529834411481	0.137162583577069	7	0.238529834411481
15	BALTIMORE SUN	The Baltimore Sun	Newspaper	MAIN NEWS	NA	December 14, 2017	2017	12	24	HIGHLIGHT: Kiquana Downer, who has a 10-year o	1	0	1	1	1	TRUE	major_paper	BALTIMORESUN.COM	-0.1321	0.0115096576553173	0.222634442684665	0.181422025047435	0.0620496816789714	0.123375805546841	0.173967458121928	0.215802825799245	0.00923810346559699	2	0.222634442684665
16	BALTIMORE SUN	The Baltimore Sun	Newspaper	MAIN NEWS	NA	May 23, 2017	2017	5	17	HIGHLIGHT: President Donald Trump's first budge	1	1	1	1	1	TRUE	major_paper	BALTIMORESUN.COM	-0.1321	0.246061928797175	0.00827525675595345	0.169348201465633	0.297241399137192	0.000972069987307821	0.00194590245840785	0.0380507284670505	0.23810451293128	4	0.297241399137192
17	BALTIMORE SUN	The Baltimore Sun	Newspaper	MAIN NEWS	NA	December 3, 2016	2016	12	36	Bay oysters can't reverse poultry manure polluti	1	1	1	1	1	TRUE	major_paper	BALTIMORESUN.COM	-0.1321	0.24389428282361	0.0639877312117369	0.114996439785123	0.127448927135664	0.165427550953568	0.0116874337540168	0.141321825069293	0.131235809266989	1	0.24389428282361
18	BALTIMORE SUN	The Baltimore Sun	Newspaper	MAIN NEWS	NA	January 13, 2017	2017	1	13	Md.'s drug treatment deficit Meredith Cohn's ar	1	1	1	1	1	TRUE	major_paper	BALTIMORESUN.COM	-0.1321	0.197165732905675	0.12118787466705	0.237656088439287	0.0975324452688052	0.0428224285946973	0.0975618813985859	0.136891484509454	0.0691820642164446	3	0.237656088439287
19	BALTIMORE SUN	The Baltimore Sun	Newspaper	MAIN NEWS	NA	May 9, 2016	2016	5	29	Secrecy has wounded city schools leadership Ha	1	0	1	1	1	TRUE	major_paper	BALTIMORESUN.COM	-0.1321	0.0989954876640275	0.199711306826756	0.0615619074734108	0.236041969311692	0.103501643749865	0.105374617257308	0.17972015391819	0.0150929137987501	4	0.236041969311692
20	BALTIMORE SUN	The Baltimore Sun	Newspaper	MAIN NEWS	NA	August 23, 2016	2016	8	32	HIGHLIGHT: Flood victim Robert Miller, 66, pray	1	0	1	1	1	TRUE	major_paper	BALTIMORESUN.COM	-0.1321	0.0153998486126246	0.131535852269845	0.0169940960314612	0.112787085789368	0.34461477626117	0.225212179576585	0.14487697415216	0.00857918730678539	5	0.34461477626117
21	BALTIMORE SUN	The Baltimore Sun	Newspaper	MAIN NEWS	NA	September 10, 2017	2017	9	21	A new federal report shows that fewer families i	1	0	1	1	1	TRUE	major_paper	BALTIMORESUN.COM	-0.1321	0.0113286099238176	0.118104033897916	0.563172177662665	0.195321177946403	0.0166288262621226	0.021599919891745	0.0605749162698834	0.0132703381454472	3	0.563172177662665
22	BALTIMORE SUN	The Baltimore Sun	Newspaper	MAIN NEWS	NA	March 13, 2016	2016	3	27	Colleges address rising threat of student hunge	1	0	1	1	1	TRUE	major_paper	BALTIMORESUN.COM	-0.1321	0.00261478122178113	0.101890176512754	0.107101717540497	0.198352055714356	0.0196011976877656	0.272540305171116	0.295952320392644	0.00194744575908699	7	0.295952320392644
23	BALTIMORE SUN	The Baltimore Sun	Newspaper	MAIN NEWS	NA	May 25, 2017	2017	5	17	WASHINGTON - Sen. Chris Van Hollen was quizzing	1	0	1	1	1	TRUE	major_paper	BALTIMORESUN.COM	-0.1321	0.310035893908421	0.11186926636681	0.0265954095542996	0.0220455741548705	0.106720569342547	0.00369359139712388	0.0520952255454843	0.366944469730444	8	0.366944469730444
24	BALTIMORE SUN	The Baltimore Sun	Newspaper	MAIN NEWS	NA	May 26, 2017	2017	5	17	HIGHLIGHT: In a radio interview, HUD Secretary	1	0	1	1	1	TRUE	major_paper	BALTIMORESUN.COM	-0.1321	0.269289579265523	0.0377342119866184	0.200527876855987	0.309451784054931	0.0082557718134245	0.0205434099789683	0.11648712808433	0.0377102379602177	4	0.309451784054931
25	BALTIMORE SUN	The Baltimore Sun	Newspaper	WKND	NA	May 26, 2017	2017	5	17	HIGHLIGHT: Brew at the Zoo is Saturday and Sund	0	1	1	1	1	TRUE	major_paper	BALTIMORESUN.COM	-0.1321	0.0468756292386085	0.0779197305475975	0.0449132168842169	0.0319032633230957	0.550896772243396	0.0500775524030232	0.191109258958352	0.00630457640171136	5	0.550896772243396
26	BALTIMORE SUN	The Baltimore Sun	Newspaper	MAIN NEWS	NA	November 12, 2017	2017	11	23	HIGHLIGHT: Annapolis-area pre-K students partic	1	0	1	1	1	TRUE	major_paper	BALTIMORESUN.COM	-0.1321	0.066167272041645	0.0251043725930935	0.391143890987221	0.40347919076516	0.00448542468674042	0.0386987231087504	0.0613783198714083	0.00954280594598222	4	0.40347919076516
27	BALTIMORE SUN	The Baltimore Sun	Newspaper	MAIN NEWS	NA	June 18, 2017	2017	6	18	HIGHLIGHT: Kathy Strait takes medication along	1	0	1	1	1	TRUE	major_paper	BALTIMORESUN.COM	-0.1321	0.00286218723373729	0.0167497360497433	0.0617462680632275	0.126153153325654	0.0125434461188263	0.340878567201401	0.43775202212883	0.00131461987858072	7	0.43775202212883
28	BALTIMORE SUN	The Baltimore Sun	Newspaper	ANNE ARUNDEL	NA	June 26, 2016	2016	6	30	HIGHLIGHT: Georgia Miller of Brooklyn shops for	1	0	1	1	1	TRUE	major_paper	BALTIMORESUN.COM	-0.1321	0.00774652242892814	0.136796449566558	0.148376589441015	0.084190403241	0.169243304790333	0.128720442370353	0.268307801578621	0.0566184865831928	7	0.268307801578621
29	BALTIMORE SUN	The Baltimore Sun	Newspaper	MAIN NEWS	NA	August 22, 2017	2017	8	20	Oppose the law, not Kushner Really, a front pa	1	1	1	1	1	TRUE	major_paper	BALTIMORESUN.COM	-0.1321	0.296896832376583	0.164196955526457	0.137725688585546	0.0216580433248078	0.152156994364339	0.0815224498040408	0.128706339286717	0.0171366967315095	1	0.296896832376583
30	BALTIMORE SUN	The Baltimore Sun	Newspaper	MAIN NEWS	NA	June 12, 2017	2017	6	18	"Why don't they just leave?" In cases of intima	1	0	1	1	1	TRUE	major_paper	BALTIMORESUN.COM	-0.1321	0.0981914457868186	0.123297587287432	0.344813618529637	0.0796750740512708	0.0935630913806726	0.135710382820867	0.025604750746634	0.0991440493966674	3	0.344813618529637
31	BALTIMORE SUN	The Baltimore Sun	Newspaper	MAIN NEWS	NA	May 8, 2016	2016	5	29	HIGHLIGHT: LaMona Linder of Elkridge lost her	1	0	1	1	1	TRUE	major_paper	BALTIMORESUN.COM	-0.1321	0.00339285104838554	0.252094506569814	0.0202154779040629	0.335270376403803	0.0208166178366342	0.164825686173267	0.187734900694981	0.0156495833690513	4	0.335270376403803
32	BALTIMORE SUN	The Baltimore Sun	Newspaper	MAIN NEWS	NA	December 16, 2016	2016	12	36	Trump must follow profit clause Those who are	1	1	1	1	1	TRUE	major_paper	BALTIMORESUN.COM	-0.1321	0.413584399158169	0.0480901281498279	0.168398099907975	0.0357514130742617	0.0437106048528775	0.0587109967391241	0.162985366546579	0.0687689915711862	1	0.413584399158169
33	BALTIMORE SUN	The Baltimore Sun	Newspaper	MAIN NEWS	NA	July 20, 2016	2016	7	31	Although most talk about inequality in the U.S.	1	0	1	1	1	TRUE	major_paper	BALTIMORESUN.COM	-0.1321	0.075983105045841	0.0060072103878452	0.0907226478757447	0.752199417500749	0.00137932579866081	0.00984176646961062	0.0466444870292753	0.0172220398922734	4	0.752199417500749
34	BALTIMORE SUN	The Baltimore Sun	Newspaper	MAIN NEWS	NA	April 16, 2017	2017	4	16	HIGHLIGHT: Hala Halabi, left, director of refug	1	0	1	1	1	TRUE	major_paper	BALTIMORESUN.COM	-0.1321	0.201617030292471	0.13080473254349	0.0190994331607292	0.0196237954295853	0.046934992483356	0.461800716861866	0.116385492624591	0.00373380660391203	6	0.461800716861866
35	BALTIMORE SUN	The Baltimore Sun	Newspaper	MAIN NEWS	NA	May 7, 2017	2017	5	17	HIGHLIGHT: Marvin and Denise Jones have been i	1	0	1	1	1	TRUE	major_paper	BALTIMORESUN.COM	-0.1321	0.00124743653539861	0.186110985720823	0.0115393398152584	0.0714956091415443	0.0598318874592225	0.420730208403034	0.248405504474745	0.000639028449973	6	0.420730208403034
36	BALTIMORE SUN	The Baltimore Sun	Newspaper	MAIN NEWS	NA	September 5, 2016	2016	9	33	HIGHLIGHT: University of Kansas safety Fish Smi	1	0	1	1	1	TRUE	major_paper	BALTIMORESUN.COM	-0.1321	0.0189674509081081	0.0166490836301459	0.0064166651241311	0.0113401335874075	0.098645319403283	0.197567029713754	0.649212638887162	0.00120167874600824	7	0.649212638887162
37	BALTIMORE SUN	The Baltimore Sun	Newspaper	MAIN NEWS	NA	November 30, 2016	2016	11	35	With eight new Democrats joining Baltimore's Cit	1	0	1	1	1	TRUE	major_paper	BALTIMORESUN.COM	-0.1321	0.110461469451056	0.30321432430765	0.0188968864478571	0.317627010596557	0.0856260637653176	0.0164146864055637	0.0439220439435453	0.103837515082453	4	0.317627010596557
38	BALTIMORE SUN	The Baltimore Sun	Newspaper		NA	February 7, 2017	2017	2	14	HIGHLIGHT: Young A majority of the City Coun	1	0	1	1	1	TRUE	major_paper	BALTIMORESUN.COM	-0.1321	0.0445586078803408	0.292512984335118	0.057361365232911	0.321381062550182	0.0374177239270618	0.00779759918322889	0.0799976285063951	0.158973028384763	4	0.321381062550182
39	BALTIMORE SUN	The Baltimore Sun	Newspaper		NA	February 8, 2017	2017	2	14	I feel compelled to school some of my fellow Ame	1	0	1	1	1	TRUE	major_paper	BALTIMORESUN.COM	-0.1321	0.158246234669429	0.187594857333635	0.150442360810762	0.19566744457142	0.0363934566151328	0.07974413173088	0.176805537292969	0.0151059769757714	4	0.19566744457142
40	BALTIMORE SUN	The Baltimore Sun	Newspaper	MAIN NEWS	NA	December 24, 2017	2017	12	24	HIGHLIGHT: Christopher Partee lost his job afte	1	0	1	1	1	TRUE	major_paper	BALTIMORESUN.COM	-0.1321	0.0744491121216304	0.349979389260285	0.0204785338675677	0.0457913087643016	0.0859487768267487	0.0745104052667176	0.344703999273777	0.00413847461897274	2	0.349979389260285
41	BALTIMORE SUN	The Baltimore Sun	Newspaper	MAIN NEWS	NA	July 10, 2017	2017	7	19	As a candidate for president, Donald J. Trump re	1	0	1	1	1	TRUE	major_paper	BALTIMORESUN.COM	-0.1321	0.264603772598329	0.00921301776808358	0.0138577689042882	0.467700756516561	0.00603975749161008	0.00227169748787628	0.0839484700256201	0.152364759207632	4	0.467700756516561
42	BALTIMORE SUN	The Baltimore Sun	Newspaper	MAIN NEWS	NA	January 7, 2017	2017	1	13	Maryland is one of seven states chosen by the U.	1	1	1	1	1	TRUE	major_paper	BALTIMORESUN.COM	-0.1321	0.00803804434742769	0.472168471339069	0.284180075111878	0.0639717478086856	0.0142275972350482	0.02757855535526	0.113640956253788	0.0161945525488438	2	0.472168471339069
43	BALTIMORE SUN	The Baltimore Sun	Newspaper	FEATURES	NA	August 27, 2017	2017	8	20	HIGHLIGHT: The living room wall tells one of m	1	0	1	1	1	TRUE	major_paper	BALTIMORESUN.COM	-0.1321	0.052342626735796	0.132840838884649	0.00592838042144538	0.0254162347487808	0.0422736801876051	0.0834223496812977	0.654941275778	0.00283461356242568	7	0.654941275778
44	BALTIMORE SUN	The Baltimore Sun	Newspaper	MAIN NEWS	NA	April 25, 2016	2016	4	28	Federal Reserve should focus on inflation By P	1	0	1	1	1	TRUE	major_paper	BALTIMORESUN.COM	-0.1321	0.021643416758384	0.0455883738469837	0.0232712917725862	0.737751474740424	0.00747886551736895	0.0121138979385494	0.0602525842142088	0.0919000952114956	4	0.737751474740424
45	BALTIMORE SUN	The Baltimore Sun	Newspaper	MAIN NEWS	NA	April 28, 2016	2016	4	28	When a parent goes to prison Our view: Children	1	0	1	1	1	TRUE	major_paper	BALTIMORESUN.COM	-0.1321	0.00429785102162259	0.0523209814145832	0.373898445743552	0.122918023088169	0.146552260460785	0.234724991709789	0.0617934223240305	0.00349402423746979	3	0.373898445743552
46	BALTIMORE SUN	The Baltimore Sun	Newspaper	MAIN NEWS	NA	June 18, 2017	2017	6	18	HIGHLIGHT: President Donald Trump instructed th	1	0	1	1	1	TRUE	major_paper	BALTIMORESUN.COM	-0.1321	0.0650917735965445	0.0714280524761951	0.176608050423722	0.383043430659783	0.0242154770368675	0.216309884598398	0.0492204860405159	0.0140828451679735	4	0.383043430659783
47	BALTIMORE SUN	The Baltimore Sun	Newspaper	MAIN NEWS	NA	February 24, 2017	2017	2	14	HIGHLIGHT: A large crowd marched through Baltim	1	0	1	1	1	TRUE	major_paper	BALTIMORESUN.COM	-0.1321	0.117935415907078	0.303611185811355	0.125118476684839	0.048056961302874	0.0817439943439113	0.184493707403151	0.133254084911164	0.00578617363562682	2	0.303611185811355
48	CHRONICLE	The Chronicle	Newspaper	NA	Centralia, Washington	January 30, 2014	2014	1	49	Jan. 30--A Toledo woman faces felony theft charg	1	0	1	1	1	TRUE	major_paper	SFGATE.COM	-0.581	0.00301216934615653	0.435785802291335	0.13724784129175	0.0508574337152927	0.137675543608567	0.195134214465036	0.0362386462117058	0.00404834907015659	2	0.435785802291335
49	CHRONICLE	The Chronicle	Newspaper	NA	Centralia, Washington	April 12, 2012	2012	4	76	April 12--The Lewis County Farmers Market is mov	1	0	1	1	1	TRUE	major_paper	SFGATE.COM	-0.581	0.00948673328729484	0.278770144924754	0.0370727544446992	0.0198619640193356	0.286226838968025	0.126736508966385	0.222210883407306	0.0196341719822013	5	0.286226838968025
50	CHRONICLE	The Chronicle	Newspaper	NA	Centralia, Washington	July 24, 2014	2014	7	55	July 24--Centralia detectives are still asking t	1	0	1	1	1	TRUE	major_paper	SFGATE.COM	-0.581	0.00468181568068455	0.195868170418657	0.0201571309966549	0.0193915255982601	0.145404042078727	0.41341548449507	0.199013607865656	0.00206822286629062	6	0.41341548449507
51	CHRONICLE	The Chronicle	Newspaper	NA	Centralia, Washington	April 18, 2009	2009	4	112	Apr. 18--Many in this community see immigration	1	0	1	1	1	TRUE	major_paper	SFGATE.COM	-0.581	0.108416554343154	0.357468774295498	0.0922250776062468	0.223531999060682	0.0369798928989225	0.0565490443560974	0.0690482822163003	0.0557803752230999	2	0.357468774295498
52	CHRONICLE	The Chronicle	Newspaper	NA	Toowoomba, Queensland	December 10, 2010	2010	12	108	Appeal launch LOCALS in need will receive an ex	0	0	0	1	1	TRUE	major_paper	SFGATE.COM	-0.581	0.00438864372705534	0.258443106978894	0.0889452747484632	0.0557077020875663	0.0533225187960441	0.480281972822305	0.0481637885134668	0.0107469923262056	6	0.480281972822305
53	CHRONICLE	The Chronicle	Newspaper	NA	Centralia, Washington	April 24, 2012	2012	4	76	April 24--After Nycci Ford got evicted from her	1	0	1	1	1	TRUE	major_paper	SFGATE.COM	-0.581	0.00784039205981225	0.171633854934407	0.159506518260273	0.288027572796772	0.0642182337870509	0.160328807481461	0.141496184123867	0.0069484365563572	4	0.288027572796772
54	CHRONICLE	The Chronicle	Newspaper	NA	Centralia, Washington	June 30, 2009	2009	6	114	Jun. 30--Republican Congressional candidate Dav	1	0	1	1	1	TRUE	major_paper	SFGATE.COM	-0.581	0.45083519973504	0.0844621208920245	0.0288817305055821	0.124764233371182	0.0628266747052238	0.023180782297305	0.0909751947599017	0.134074063733741	1	0.45083519973504
55	CHRONICLE	The Chronicle	Newspaper	NA	Centralia, Washington	June 24, 2014	2014	6	54	June 24--At the peak of the House of the Rising	1	0	1	1	1	TRUE	major_paper	SFGATE.COM	-0.581	0.00250266536251821	0.286927552654553	0.00863234237217238	0.0387997315666165	0.0950847303373623	0.385467676752326	0.1808946156392	0.00169068531525159	6	0.385467676752326
56	CHRONICLE	The Chronicle	Newspaper	NA	Centralia, Washington	August 7, 2015	2015	8	44	Aug. 07--Incarceration can be challenging to any	1	0	1	1	1	TRUE	major_paper	SFGATE.COM	-0.581	0.0339835932836281	0.117033353478948	0.170139404686297	0.0621651143761433	0.129967953488578	0.142782972590328	0.33534108465687	0.00858652343920742	7	0.33534108465687
57	CHRONICLE	The Chronicle	Newspaper	NA	Centralia, Washington	November 17, 2009	2009	11	119	Nov. 17--As Lewis County food banks are gearing	1	0	1	1	1	TRUE	major_paper	SFGATE.COM	-0.581	0.00593281974214897	0.0708610130730491	0.00892839192643336	0.196085638555478	0.315128397628466	0.19604737188566	0.204001636725759	0.00301473046300544	5	0.315128397628466
58	CHRONICLE	The Chronicle	Newspaper	NA	Centralia, Washington	December 28, 2017	2017	12	24	Dec. 28--The Community Farmers Market at Chehali	1	0	1	1	1	TRUE	major_paper	SFGATE.COM	-0.581	0.0124242396653248	0.243296284733366	0.158352119925995	0.278285839718047	0.0234212054880069	0.105845436720323	0.119315485600298	0.0590593881486397	4	0.278285839718047
59	CHRONICLE	The Chronicle	Newspaper	NA	Centralia, Washington	January 31, 2012	2012	1	73	Jan. 31--The reports last year were shocking but	1	0	1	1	1	TRUE	major_paper	SFGATE.COM	-0.581	0.0633129959508687	0.355136351687196	0.255269650831053	0.0235907295774093	0.0248201423626997	0.0417400235484825	0.161726868751818	0.0744032372904729	2	0.355136351687196
60	CHRONICLE	The Chronicle	Newspaper	NA	Toowoomba, Queensland	May 14, 2016	2016	5	29	Medicare rebates I WILL offer $100 reward to th	0	0	0	1	1	TRUE	major_paper	SFGATE.COM	-0.581	0.0864151236551373	0.0404949369277921	0.0212208985410666	0.14544671057684	0.0709384674132832	0.123585491504183	0.344746410369342	0.167151961012356	7	0.344746410369342
61	CHRONICLE	The Chronicle	Newspaper		Centralia, Washington	September 22, 2012	2012	9	81	Sept. 22--Whatever your feelings about welfare,	1	0	1	1	1	TRUE	major_paper	SFGATE.COM	-0.581	0.0378768586375301	0.16592713264507	0.0935388519555385	0.116243975831653	0.126014100769923	0.184267530585582	0.261049551466423	0.0150819981082805	7	0.261049551466423
62	CHRONICLE	The Chronicle	Newspaper	NA	Centralia, Washington	January 5, 2013	2013	1	61	Jan. 05--For a few hours this week, Congress loo	1	0	1	1	1	TRUE	major_paper	SFGATE.COM	-0.581	0.0388115762812954	0.0250301586261336	0.118219827581458	0.209693968875439	0.00776463261431024	0.0338578335638975	0.235670710315012	0.330951292142455	8	0.330951292142455
63	CHRONICLE	The Chronicle	Newspaper	A	Australia	January 12, 2016	2016	1	25	JUST FRIENDS We are a friendly social group for	0	0	0	1	1	TRUE	major_paper	SFGATE.COM	-0.581	0.0133222392592313	0.110788874751121	0.0440604410416758	0.0179696922361655	0.227007406744709	0.196837160461568	0.384757873363281	0.00525631214224812	7	0.384757873363281
64	CHRONICLE	The Chronicle	Newspaper	NA	Centralia, Washington	July 17, 2012	2012	7	79	July 17--Confronted with a life of poverty, negl	1	0	1	1	1	TRUE	major_paper	SFGATE.COM	-0.581	0.00439513446318897	0.0170365463157973	0.141412160009864	0.144272721520709	0.0137897966278336	0.36185738041706	0.314886918315518	0.00234934233002944	6	0.36185738041706
65	CHRONICLE	The Chronicle	Newspaper	NA	Centralia, Washington	March 26, 2014	2014	3	51	March 26--A 39-year-old Centralia woman was arre	1	0	1	1	1	TRUE	major_paper	SFGATE.COM	-0.581	0.00560562803575334	0.327843012945595	0.00382431384409887	0.00642942824521852	0.556091657518972	0.0342884556204112	0.0636802514707232	0.00223725231922717	5	0.556091657518972
66	CHRONICLE	The Chronicle	Newspaper	NA	Centralia, Washington	November 8, 2010	2010	11	107	Nov. 08--Martha Everett volunteers her time at t	1	0	1	1	1	TRUE	major_paper	SFGATE.COM	-0.581	0.00377033022974212	0.0365735252422569	0.0762837437190949	0.0900561766770126	0.0200138471297295	0.400550183720682	0.369842443949329	0.00290974933215291	6	0.400550183720682
67	CHRONICLE	The Chronicle	Newspaper	STATE AND REGIONAL NEWS LENGTH: 3327 words May 22--Washington State Office: Governor Local candidate name: Javier Lopez A local artist is making another attempt at running for the state's highest office. Javier Lopez, Bucoda, unsuccessfully ran for governor in 2008. He also unsuccessfully ran for the Town Council of Bucoda before that. "I am very much in love with the people of Washington," he sa…	Centralia, Washington	May 22, 2012	2012	5	77	May 22--Washington State Office: Governor Loc	1	0	1	1	1	TRUE	major_paper	SFGATE.COM	-0.581	0.258888094877232	0.182193076838827	0.0938552400979261	0.0518972943016586	0.150232769676353	0.035409072437062	0.160391490266646	0.0671329615042953	1	0.258888094877232
68	CHRONICLE	The Chronicle	Newspaper	NA	Centralia, Washington	March 1, 2016	2016	3	27	March 01--Spending a weekend cooped up in a util	1	0	1	1	1	TRUE	major_paper	SFGATE.COM	-0.581	0.00738707291975222	0.0565561303301802	0.0209724328937129	0.0358391602651202	0.148211870766984	0.302024026460215	0.370171120915046	0.0588381854489898	7	0.370171120915046
69	CHRONICLE	The Chronicle	Newspaper	NA	Centralia, Washington	May 17, 2014	2014	5	53	May 17--The Randle man whose driving while licen	1	0	1	1	1	TRUE	major_paper	SFGATE.COM	-0.581	0.00525586471486769	0.548286599967029	0.0176476120770697	0.0600163839380654	0.310558267975487	0.0198377532253387	0.0304196039144541	0.00797791418768854	2	0.548286599967029
70	DENVER POST	The Denver Post	Newspaper	OPINION	NA	November 28, 2012	2012	11	83	With Obamacare a certainty, Colorado's 80 hospit	1	0	1	1	1	TRUE	major_paper	DENVERPOST.COM	-0.2012	0.0118220572971155	0.254751420919317	0.509921896288268	0.106364233028871	0.0103548839678501	0.0336631216274966	0.0372135668040656	0.0359088200670159	3	0.509921896288268
71	DENVER POST	The Denver Post	Newspaper	ASECTION	NA	November 9, 2012	2012	11	83	WASHINGTON House Republicans' hard line against	1	0	1	1	1	TRUE	major_paper	DENVERPOST.COM	-0.2012	0.163016707653589	0.00430993095750606	0.00720066815113633	0.240241020348389	0.00138435281606068	0.000349491538532355	0.043511066836128	0.539986761698659	8	0.539986761698659
72	DENVER POST	The Denver Post	Newspaper	PERSPECT	NA	May 15, 2016	2016	5	29	Now and then a worthy economic proposal comes a	1	0	1	1	1	TRUE	major_paper	DENVERPOST.COM	-0.2012	0.130346013988487	0.0237054981397135	0.222214690690162	0.445760718248917	0.00262491143992602	0.00320547930662287	0.0857909353163386	0.0863517528698333	4	0.445760718248917
73	DENVER POST	The Denver Post	Newspaper	ASECTION	NA	November 13, 2012	2012	11	83	Seven-year-old Zoe Garcia lived a nightmarish ex	1	0	1	1	1	TRUE	major_paper	DENVERPOST.COM	-0.2012	0.0045886296372813	0.21326317565455	0.090286042886109	0.00688691324646583	0.344595817764935	0.27516802323668	0.0634190280044709	0.00179236956950824	5	0.344595817764935
74	DENVER POST	The Denver Post	Newspaper	ASECTION	NA	February 6, 2017	2017	2	14	Appellate lawyers for convicted child abuser Aa	1	0	1	1	1	TRUE	major_paper	DENVERPOST.COM	-0.2012	0.0622863570316946	0.415258040008503	0.132040207863304	0.0303141663769263	0.18250331154687	0.0935856445734188	0.0810298044973196	0.00298246810196319	2	0.415258040008503
75	DENVER POST	The Denver Post	Newspaper	DTW	NA	February 24, 2012	2012	2	74	Immediately after Colorado's massive benefits-ma	1	0	1	1	1	TRUE	major_paper	DENVERPOST.COM	-0.2012	0.0955246551949052	0.18407261411953	0.19899018249187	0.159188039541597	0.023002003589929	0.00953758663398744	0.240693628671846	0.088991289756336	7	0.240693628671846
76	DENVER POST	The Denver Post	Newspaper	DTW	NA	February 2, 2014	2014	2	50	Dr. Robin Dickinson never expected to be on food	1	1	1	1	1	TRUE	major_paper	DENVERPOST.COM	-0.2012	0.00659117400418952	0.0364364898286807	0.294551072547361	0.14467912450015	0.0297398990272217	0.190142440113728	0.185348321841013	0.112511478137657	3	0.294551072547361
77	DENVER POST	The Denver Post	Newspaper	ASECTION	NA	August 25, 2017	2017	8	20	The Department of Agriculture has invested seven	1	0	1	1	1	TRUE	major_paper	DENVERPOST.COM	-0.2012	0.0320098811572105	0.172596255322448	0.301587688396578	0.169799833858213	0.0097312516566527	0.017023179447042	0.279859279000781	0.0173926311610747	3	0.301587688396578
78	DENVER POST	The Denver Post	Newspaper	ASECTION	NA	July 15, 2015	2015	7	43	CHARGES FILED IN BOY'S DEATH IN CAKE CASE HAGER	1	0	1	1	1	TRUE	major_paper	DENVERPOST.COM	-0.2012	0.158470587153815	0.193474343392731	0.0658092851643833	0.154598701174972	0.190567453808866	0.0588578112950646	0.0709187929723439	0.107303025037824	2	0.193474343392731
79	DENVER POST	The Denver Post	Newspaper	OPINION	NA	August 22, 2017	2017	8	20	In a couple of recent examples, we've been pleas	1	0	1	1	1	TRUE	major_paper	DENVERPOST.COM	-0.2012	0.172075595163291	0.332377739326714	0.0309812996539133	0.130472882920318	0.044967143498746	0.00538933874410638	0.204293904431612	0.0794420962612987	2	0.332377739326714
80	DENVER POST	The Denver Post	Newspaper	ASECTION	NA	February 23, 2012	2012	2	74	A plea for millions of dollars to fix the long-t	1	0	1	1	1	TRUE	major_paper	DENVERPOST.COM	-0.2012	0.021518037663869	0.453075446924227	0.259335786379091	0.0288641553805208	0.0215346464232468	0.00726316368040275	0.0829945607846775	0.125414202763966	2	0.453075446924227
81	DENVER POST	The Denver Post	Newspaper	FEATURES	NA	June 1, 2015	2015	6	42	Symphonie Dawson was studying to be a paralegal	1	0	1	1	1	TRUE	major_paper	DENVERPOST.COM	-0.2012	0.032635938492171	0.0908078013738591	0.388010700957243	0.162772148871754	0.00796872945285822	0.182795419737967	0.107795000202814	0.0272142609113326	3	0.388010700957243
82	DENVER POST	The Denver Post	Newspaper	BUSINESS	NA	June 7, 2015	2015	6	42	NEW YORK It can be used to buy lattes, order cab	1	0	1	1	1	TRUE	major_paper	DENVERPOST.COM	-0.2012	0.0209458030599175	0.414686437904104	0.0609133827367064	0.141415128947497	0.0260237031559972	0.040155481889888	0.155352912982081	0.140507149323809	2	0.414686437904104
83	DENVER POST	The Denver Post	Newspaper	OPINION	NA	March 10, 2014	2014	3	51	Are conservatives interested in new ideas, or ar	1	0	1	1	1	TRUE	major_paper	DENVERPOST.COM	-0.2012	0.433429301182279	0.00757284516543359	0.127346493631778	0.0424480723931213	0.00297104101194048	0.0105630107509529	0.350529026016782	0.0251402098477117	1	0.433429301182279
84	DENVER POST	The Denver Post	Newspaper	ASECTION	NA	December 2, 2015	2015	12	48	Four women have sued the city of Trinidad and th	1	0	1	1	1	TRUE	major_paper	DENVERPOST.COM	-0.2012	0.00453772845564022	0.531313574035432	0.0237485301816294	0.00916887392621886	0.278046322675443	0.104641096092189	0.0468565958615956	0.00168727877185246	2	0.531313574035432
85	DENVER POST	The Denver Post	Newspaper	DTW	NA	May 24, 2015	2015	5	41	MONTE VISTA The kids were showered and ready for	1	0	1	1	1	TRUE	major_paper	DENVERPOST.COM	-0.2012	0.00406146466353079	0.0331128490981212	0.0310981458705491	0.0285025312114339	0.105005017026421	0.535296610262831	0.261634491910173	0.00128888995693931	6	0.535296610262831
86	DENVER POST	The Denver Post	Newspaper	ASECTION	NA	March 15, 2016	2016	3	27	The four neighboring Lakewood couples gathered	1	0	1	1	1	TRUE	major_paper	DENVERPOST.COM	-0.2012	0.530632308068486	0.0106661386672105	0.0105353290182734	0.0206486441465038	0.0228040991536326	0.0270978424970077	0.36939155040912	0.00822408803976519	1	0.530632308068486
87	DENVER POST	The Denver Post	Newspaper	ASECTION	NA	May 24, 2017	2017	5	17	WASHINGTON The poor and the disabled are big los	1	0	1	1	1	TRUE	major_paper	DENVERPOST.COM	-0.2012	0.103964204537035	0.0395420302437857	0.156920776827054	0.0554224756404703	0.0190859109305035	0.00214779105641357	0.0114692181129191	0.611447592651819	8	0.611447592651819
88	DENVER POST	The Denver Post	Newspaper	ASECTION	NA	January 19, 2012	2012	1	73	CHARLESTON, S.C. Mitt Romney waged a new onslaug	1	0	1	1	1	TRUE	major_paper	DENVERPOST.COM	-0.2012	0.641560467700193	0.00991444888075616	0.00959695856633815	0.124983058253874	0.016080519176254	0.0041642722773373	0.168552546018263	0.0251477291269847	1	0.641560467700193
89	DENVER POST	The Denver Post	Newspaper	OPINION	NA	February 7, 2012	2012	2	74	It's late Monday morning, the day before the big	1	0	1	1	1	TRUE	major_paper	DENVERPOST.COM	-0.2012	0.571747760972843	0.00891731765461334	0.0125736371586515	0.0226575639407958	0.00926534312763137	0.00481013547061282	0.343864019848167	0.0261642218266849	1	0.571747760972843
90	DENVER POST	The Denver Post	Newspaper	BUSINESS	NA	February 21, 2014	2014	2	50	WALMART BLUES: PROFIT DROPS AS ECONOMY REBOUNDS	1	0	1	1	1	TRUE	major_paper	DENVERPOST.COM	-0.2012	0.0132626458272551	0.173774688193244	0.0112911996348008	0.520985557455977	0.154409525256829	0.004037484989637	0.0420912640879972	0.0801476345542599	4	0.520985557455977
91	DENVER POST	The Denver Post	Newspaper	ASECTION	NA	May 3, 2016	2016	5	29	Colorado's food assistance program, among the w	1	0	1	1	1	TRUE	major_paper	DENVERPOST.COM	-0.2012	0.0150684303829055	0.185327725188873	0.509125486557563	0.0479205659799376	0.044894467186997	0.00840235671924619	0.0920977564853116	0.0971632114991656	3	0.509125486557563
92	DENVER POST	The Denver Post	Newspaper	OPINION	NA	March 14, 2013	2013	3	63	Paul Ryan's budget could prove to be a perversel	1	0	1	1	1	TRUE	major_paper	DENVERPOST.COM	-0.2012	0.323771711881327	0.00845001069995551	0.0246502818218927	0.116178512515652	0.00220607036941723	0.00108776931205713	0.0899932767700895	0.433662366629609	8	0.433662366629609
93	DENVER POST	The Denver Post	Newspaper	PERSPECT	NA	July 9, 2017	2017	7	19	With Congress in recess, we've had a brief respi	1	0	1	1	1	TRUE	major_paper	DENVERPOST.COM	-0.2012	0.186606375367154	0.0699311727071977	0.201445067263723	0.0948938738799654	0.0257969814715049	0.0951000348607245	0.217567340831022	0.108659153618709	7	0.217567340831022
94	DENVER POST	The Denver Post	Newspaper	PERSPECT	NA	October 16, 2016	2016	10	34	Raise state's minimum wage Re: "Should Colorado	1	0	1	1	1	TRUE	major_paper	DENVERPOST.COM	-0.2012	0.0397167538274551	0.0183818709338951	0.151259840105856	0.625874783814766	0.00483527510646613	0.00920286446882505	0.0793485986659554	0.0713800130767809	4	0.625874783814766
95	DENVER POST	The Denver Post	Newspaper	ASECTION	NA	June 20, 2015	2015	6	42	Frustrated by persistent problems in the state's	1	0	1	1	1	TRUE	major_paper	DENVERPOST.COM	-0.2012	0.0530669199589556	0.497021395346795	0.0612656330810584	0.0242221667297651	0.00955136419732671	0.00521790867830572	0.145573597765125	0.204081014242669	2	0.497021395346795
96	DENVER POST	The Denver Post	Newspaper	PERSPECT	NA	November 18, 2012	2012	11	83	Re: Replies to Tosches on "dumb states" Re: "D	1	0	1	1	1	TRUE	major_paper	DENVERPOST.COM	-0.2012	0.498380403284156	0.0246612569346265	0.0366628054858673	0.105111929788526	0.0748303684452358	0.0038418536650033	0.175333371950793	0.0811780104457921	1	0.498380403284156
97	DENVER POST	The Denver Post	Newspaper		NA	October 10, 2017	2017	10	22	When Greg Stegall left the Navy at 30 years old,	1	0	1	1	1	TRUE	major_paper	DENVERPOST.COM	-0.2012	0.182949316762528	0.0908645495031501	0.312695320937896	0.172765498135268	0.014407923545514	0.125733353107976	0.0808131441874278	0.0197708938202394	3	0.312695320937896
98	DENVER POST	The Denver Post	Newspaper	ASECTION	NA	January 19, 2012	2012	1	73	GOV. CHRISTIE TOUTS TAX CUTS VOORHEES, N.J. New	1	0	1	1	1	TRUE	major_paper	DENVERPOST.COM	-0.2012	0.554423507114714	0.0624183608849329	0.0249542604848598	0.0334057726666225	0.0872635141447522	0.0303305252483267	0.160986910583595	0.0462171488721969	1	0.554423507114714
99	DENVER POST	The Denver Post	Newspaper	OPINION	NA	November 8, 2012	2012	11	83	It's time to take down the Obama and Romney yard	1	0	1	1	1	TRUE	major_paper	DENVERPOST.COM	-0.2012	0.571467738575307	0.0101110901354724	0.0123837103501613	0.0634642866435179	0.0246694144683406	0.00400112013954653	0.282050956793794	0.0318516828938604	1	0.571467738575307
100	DENVER POST	The Denver Post	Newspaper	PERSPECT	NA	September 21, 2014	2014	9	57	Earlier this month, I did a very scary thing. I	1	0	1	1	1	TRUE	major_paper	DENVERPOST.COM	-0.2012	0.0987749401995738	0.0355114189448461	0.0241304462226233	0.276712089716783	0.0882489031944891	0.0316393542006511	0.403328303113019	0.0416545444080139	7	0.403328303113019
101	DENVER POST	The Denver Post	Newspaper	OPINION	NA	February 24, 2012	2012	2	74	Year after year, the song has been the same when	1	0	1	1	1	TRUE	major_paper	DENVERPOST.COM	-0.2012	0.0539809972983387	0.281139640576993	0.280753010216862	0.0205720975801997	0.0140012173679155	0.0116996638144192	0.286269938710066	0.0515834344352051	7	0.286269938710066
102	DENVER POST	The Denver Post	Newspaper	PERSPECT	NA	June 21, 2015	2015	6	42	Do ultrasounds play a role in the falling abort	1	0	1	1	1	TRUE	major_paper	DENVERPOST.COM	-0.2012	0.179053002382234	0.126709541759985	0.116062855713206	0.126351193303369	0.0701926341217589	0.0114311508642562	0.363211991117416	0.00698763073777552	7	0.363211991117416
103	DENVER POST	The Denver Post	Newspaper	FEATURES	NA	March 6, 2013	2013	3	63	What does hunger in America look like? In the f	1	0	1	1	1	TRUE	major_paper	DENVERPOST.COM	-0.2012	0.0569825958427253	0.0203904583506623	0.14979782652617	0.0492292422802944	0.01041057722697	0.107434091655847	0.601912945480799	0.00384226263653225	7	0.601912945480799
104	DENVER POST	The Denver Post	Newspaper	OPINION	NA	June 16, 2016	2016	6	30	If Paul Ryan really wants to encourage more Amer	1	0	1	1	1	TRUE	major_paper	DENVERPOST.COM	-0.2012	0.0590660436316333	0.00632785714083216	0.399890397555886	0.397056183919451	0.00107950129314445	0.00413297285850048	0.0706884768151624	0.0617585667853905	3	0.399890397555886
105	DENVER POST	The Denver Post	Newspaper	ASECTION	NA	August 24, 2014	2014	8	56	A dingy fleece blanket is draped over the fish	1	0	1	1	1	TRUE	major_paper	DENVERPOST.COM	-0.2012	0.00243655590808295	0.0077595177726835	0.00752619650130672	0.00392349415192689	0.0831241268211699	0.342202527714835	0.552787310837044	0.000240270292950042	7	0.552787310837044
106	DENVER POST	The Denver Post	Newspaper	PERSPECT	NA	January 26, 2014	2014	1	49	Re: "War on Poverty did harm, not good," Jan. 1	1	0	1	1	1	TRUE	major_paper	DENVERPOST.COM	-0.2012	0.257757149706469	0.0391995406918439	0.0913685940424633	0.232047055876737	0.0929725195406663	0.00667663568164122	0.210828136932514	0.0691503675276656	1	0.257757149706469
107	DENVER POST	The Denver Post	Newspaper	OPINION	NA	April 21, 2015	2015	4	40	Revise doctor payment bill Re: "A smart plan to	1	0	1	1	1	TRUE	major_paper	DENVERPOST.COM	-0.2012	0.298608062165509	0.0620578926183029	0.084927200329733	0.0403247246956192	0.131817029842045	0.123309883822382	0.111070126766619	0.14788507975979	1	0.298608062165509
108	DENVER POST	The Denver Post	Newspaper	PERSPECT	NA	July 5, 2015	2015	7	43	One of the things I appreciate about Colorado an	1	1	1	1	1	TRUE	major_paper	DENVERPOST.COM	-0.2012	0.201087525545295	0.0285882391644871	0.255445259310654	0.24114862491606	0.0164476001083656	0.00843458448753843	0.219390010201699	0.0294581562659006	3	0.255445259310654
109	DENVER POST	The Denver Post	Newspaper	ASECTION	NA	April 3, 2017	2017	4	16	BEAVERTON, ALA. The lobby at the pain managemen	1	0	1	1	1	TRUE	major_paper	DENVERPOST.COM	-0.2012	0.0135122703539042	0.01266047449406	0.0474037672218119	0.146655179536572	0.0339566408355279	0.21280263013544	0.525755464091512	0.00725357333117273	7	0.525755464091512
110	DENVER POST	The Denver Post	Newspaper	ASECTION	NA	July 19, 2017	2017	7	19	WASHINGTON Despite opposition from Republican mo	1	0	1	1	1	TRUE	major_paper	DENVERPOST.COM	-0.2012	0.154981874129026	0.00465232669712009	0.00749072891517561	0.0165137481179243	0.00166314106276865	0.000536945583590383	0.065159885491782	0.749001350002613	8	0.749001350002613
111	DENVER POST	The Denver Post	Newspaper	ASECTION	NA	June 16, 2017	2017	6	18	Polygamous sect leader Lyle Jeffs has been captu	1	0	1	1	1	TRUE	major_paper	DENVERPOST.COM	-0.2012	0.00770159681660453	0.296257346948934	0.00705336637672813	0.00859817278025174	0.603984734138696	0.0310944010898215	0.0429407575451347	0.00236962430382966	5	0.603984734138696
112	DENVER POST	The Denver Post	Newspaper	DTW	NA	May 24, 2015	2015	5	41	At home in their fourth floor apartment, Felisha	1	0	1	1	1	TRUE	major_paper	DENVERPOST.COM	-0.2012	0.00493582021777801	0.0298016412682381	0.108776457139289	0.0218937156614954	0.0916080374788099	0.479132393920985	0.262058942610544	0.00179299170286019	6	0.479132393920985
113	DENVER POST	The Denver Post	Newspaper	DTW	NA	May 24, 2015	2015	5	41	Roger and Quiedah Carolina and their six childre	1	0	1	1	1	TRUE	major_paper	DENVERPOST.COM	-0.2012	0.00652861412315308	0.0502278333588573	0.0347055875449282	0.106717632053005	0.147275404489235	0.363430650533754	0.288956679221944	0.00215759867512426	6	0.363430650533754
114	DENVER POST	The Denver Post	Newspaper	DTW	NA	March 19, 2017	2017	3	15	WRAYYuma County sheriff's Sgt. James Thomson wa	1	0	1	1	1	TRUE	major_paper	DENVERPOST.COM	-0.2012	0.00617238871412715	0.296015619490381	0.0143351043463006	0.100837464973805	0.292184426439034	0.0438407935496208	0.193074054030029	0.0535401484567018	2	0.296015619490381
115	DENVER POST	The Denver Post	Newspaper	ASECTION	NA	June 12, 2013	2013	6	66	Colorado voter registration activists want the n	1	0	1	1	1	TRUE	major_paper	DENVERPOST.COM	-0.2012	0.280809678825281	0.505831503886966	0.0608732838906462	0.0212891433661095	0.0337231282004732	0.00322002769831806	0.0354299749974818	0.0588232591347243	2	0.505831503886966
116	DENVER POST	The Denver Post	Newspaper	OPINION	NA	September 21, 2012	2012	9	81	As you've no doubt heard, Republican presidentia	1	0	1	1	1	TRUE	major_paper	DENVERPOST.COM	-0.2012	0.401562699627864	0.0144814917718209	0.0787130558494419	0.362770419909034	0.00279040242708285	0.00218173353686861	0.0890449478334564	0.0484552490444324	1	0.401562699627864
117	DENVER POST	The Denver Post	Newspaper	PERSPECT	NA	June 23, 2013	2013	6	66	Re: Dunlap victims' families weigh in Re: "Dun	1	1	1	1	1	TRUE	major_paper	DENVERPOST.COM	-0.2012	0.336536384945263	0.0575990049927573	0.174308456168929	0.0338533585494235	0.10923885892394	0.0201997237857542	0.194927733443036	0.0733364791908966	1	0.336536384945263
118	DENVER POST	The Denver Post	Newspaper	PERSPECT	NA	September 4, 2016	2016	9	33	In 1984, Joey Johnson, a member of the Revolutio	1	0	1	1	1	TRUE	major_paper	DENVERPOST.COM	-0.2012	0.487567749849355	0.107584868960152	0.0229280087910807	0.0229378900507922	0.103500812147539	0.0069195104026377	0.229512893276905	0.0190482665215387	1	0.487567749849355
119	DENVER POST	The Denver Post	Newspaper	ASECTION	NA	January 28, 2014	2014	1	49	WASHINGTON A House plan to make major cuts to fo	1	0	1	1	1	TRUE	major_paper	DENVERPOST.COM	-0.2012	0.0821046653712994	0.00915205658268122	0.027580722128729	0.050251107543541	0.00143213780951321	0.000345855624126379	0.0141894488070005	0.814944006133109	8	0.814944006133109
120	DENVER POST	The Denver Post	Newspaper	DTW	NA	January 29, 2017	2017	1	13	A crowd waits outside Denver's Central Library	1	0	1	1	1	TRUE	major_paper	DENVERPOST.COM	-0.2012	0.00509038104139185	0.250044871115938	0.0282300899973549	0.0410813231636928	0.0961363672504181	0.350339849022807	0.22585752078649	0.00321959762190756	6	0.350339849022807
121	DENVER POST	The Denver Post	Newspaper	OPINION	NA	October 5, 2012	2012	10	82	No matter how good a debater President Obama mig	1	0	1	1	1	TRUE	major_paper	DENVERPOST.COM	-0.2012	0.568709365665536	0.00784711785198431	0.00630992932929235	0.0848327348537855	0.0125691704339462	0.00227251656769564	0.266079801196436	0.0513793641013236	1	0.568709365665536
122	DENVER POST	The Denver Post	Newspaper	PERSPECT	NA	September 23, 2012	2012	9	81	Re: "Mitt Romney secret video: Nearly half 'bel	1	0	1	1	1	TRUE	major_paper	DENVERPOST.COM	-0.2012	0.432677541656482	0.033884367068871	0.0603375491140418	0.122250563043909	0.0938333336717255	0.00704285994686848	0.217663759937167	0.0323100255609355	1	0.432677541656482
123	DENVER POST	The Denver Post	Newspaper	BUSINESS	NA	March 21, 2015	2015	3	39	SIMON BOOSTS BID FOR RIVAL NEW YORK Mall operat	1	0	1	1	1	TRUE	major_paper	DENVERPOST.COM	-0.2012	0.0305371893806419	0.363084789025978	0.0895107794789319	0.0666468487386482	0.126880736795211	0.0286580710399611	0.189970252899793	0.104711332640836	2	0.363084789025978
124	DENVER POST	The Denver Post	Newspaper	OPINION	NA	May 11, 2015	2015	5	41	Last Thursday, a federal court considered a chal	1	0	1	1	1	TRUE	major_paper	DENVERPOST.COM	-0.2012	0.0111211489826619	0.0550253092465033	0.39125966328058	0.149131034329824	0.00717047819247016	0.24367467423262	0.116917446407437	0.0257002453279036	3	0.39125966328058
125	DENVER POST	The Denver Post	Newspaper	ASECTION	NA	January 27, 2017	2017	1	13	After years of noncompliance, the state human se	1	0	1	1	1	TRUE	major_paper	DENVERPOST.COM	-0.2012	0.00639191250030844	0.443266345295466	0.346847223669114	0.13835521922692	0.0123110752757703	0.0123101832048281	0.0315760843736196	0.00894195645397382	2	0.443266345295466
126	DENVER POST	The Denver Post	Newspaper	OPINION	NA	May 3, 2013	2013	5	65	Sen. Bennet and the Gang of Eight's immigration	1	0	1	1	1	TRUE	major_paper	DENVERPOST.COM	-0.2012	0.18945221752313	0.201569986191664	0.0875656373002265	0.136473172791711	0.0949655069195569	0.0521839587552256	0.0962469992192904	0.141542521299196	2	0.201569986191664
127	DENVER POST	The Denver Post	Newspaper	BUSINESS	NA	July 1, 2016	2016	7	31	The labor union representing more than 2,400 jan	1	0	1	1	1	TRUE	major_paper	DENVERPOST.COM	-0.2012	0.0877639022191158	0.241092010938721	0.0813211029693041	0.369380731633981	0.0883843343555001	0.0527461050699133	0.0636626466073602	0.0156491662061038	4	0.369380731633981
128	DENVER POST	The Denver Post	Newspaper	ASECTION	NA	May 28, 2015	2015	5	41	Colorado is facing a $1 million sanction after G	1	0	1	1	1	TRUE	major_paper	DENVERPOST.COM	-0.2012	0.009111696288589	0.598511357477725	0.163126535491638	0.0695323247879556	0.00837401011931905	0.00558934244796805	0.0958297159010133	0.0499250174857922	2	0.598511357477725
129	DENVER POST	The Denver Post	Newspaper	OPINION	NA	August 14, 2017	2017	8	20	Extracting more money from evil, exploitative ca	1	0	1	1	1	TRUE	major_paper	DENVERPOST.COM	-0.2012	0.120627422438793	0.0226327408688308	0.0330627175911739	0.593502731929934	0.0034141144582066	0.00323569431803264	0.141334730476606	0.0821898479184233	4	0.593502731929934
130	DENVER POST	The Denver Post	Newspaper	ASECTION	NA	May 13, 2012	2012	5	77	------------------------------------------------	1	0	1	1	1	TRUE	major_paper	DENVERPOST.COM	-0.2012	0.0618411828508388	0.124536691841965	0.0212659970987155	0.00910136224508413	0.0241589757701182	0.000444928183140904	0.00550397958024639	0.753146882429891	8	0.753146882429891
131	DENVER POST	The Denver Post	Newspaper	ASECTION	NA	May 22, 2017	2017	5	17	WASHINGTON President Donald Trump's first major	1	1	1	1	1	TRUE	major_paper	DENVERPOST.COM	-0.2012	0.154591264966838	0.0104252590857774	0.216280745172702	0.0677917681177301	0.00145580942434806	0.00145014042358783	0.0334092845118742	0.514595728297143	8	0.514595728297143
132	DENVER POST	The Denver Post	Newspaper	MAIN	NA	December 6, 2012	2012	12	84	Don't forget to support our troops Kudos to Ji	1	0	1	1	1	TRUE	major_paper	DENVERPOST.COM	-0.2012	0.0752694077153332	0.124902511346337	0.051017310994414	0.0668439242266902	0.0948216262021287	0.06601588648468	0.479005248150494	0.0421240848799232	7	0.479005248150494
133	DENVER POST	The Denver Post	Newspaper	OPINION	NA	October 3, 2012	2012	10	82	On Wednesday night, Americans will watch the fir	1	0	1	1	1	TRUE	major_paper	DENVERPOST.COM	-0.2012	0.579333184454958	0.0127347441879229	0.0222004952622799	0.178470305145202	0.0070330121108371	0.00573932880472636	0.120326092627455	0.0741628374066192	1	0.579333184454958
134	DENVER POST	The Denver Post	Newspaper	Z	NA	November 5, 2017	2017	11	23	Last year, $2.3 million was distributed to 51 D	1	0	1	1	1	TRUE	major_paper	DENVERPOST.COM	-0.2012	0.00367296444545468	0.0452196163657707	0.427431129882416	0.0613760577065933	0.113698613512865	0.335021723013041	0.0115077660923132	0.00207212898154643	3	0.427431129882416
135	DENVER POST	The Denver Post	Newspaper	PERSPECT	NA	October 14, 2012	2012	10	82	Online comments Good story by Mr. Booth but it'	1	0	1	1	1	TRUE	major_paper	DENVERPOST.COM	-0.2012	0.010342118605368	0.0491282529406943	0.0274640420758008	0.0157628721770603	0.0158914657420435	0.113663644407628	0.765003996536705	0.00274360751470032	7	0.765003996536705
136	DENVER POST	The Denver Post	Newspaper	ASECTION	NA	April 17, 2017	2017	4	16	WASHINGTON As Tax Day approaches, show some love	1	0	1	1	1	TRUE	major_paper	DENVERPOST.COM	-0.2012	0.0100350775607991	0.102568252484235	0.0738462599024671	0.333643536811628	0.225524470898391	0.00881859939172199	0.0587038879846933	0.186859914966064	4	0.333643536811628
137	DENVER POST	The Denver Post	Newspaper	ASECTION	NA	February 18, 2015	2015	2	38	A Lakewood grocer was sentenced Tuesday to four	1	0	1	1	1	TRUE	major_paper	DENVERPOST.COM	-0.2012	0.00551927314433925	0.671979608089487	0.144334361011301	0.0427127698608683	0.0971111628032386	0.0107639556123392	0.0168873414409714	0.0106915280374555	2	0.671979608089487
138	DENVER POST	The Denver Post	Newspaper	ASECTION	NA	June 6, 2017	2017	6	18	The Denver City Council on Monday night added it	1	0	1	1	1	TRUE	major_paper	DENVERPOST.COM	-0.2012	0.174754936802108	0.0958648144552792	0.118210393941102	0.135641180557776	0.0111052279849728	0.00255104757158442	0.0349263744838972	0.42694602420328	8	0.42694602420328
139	DENVER POST	The Denver Post	Newspaper	PERSPECT	NA	May 18, 2014	2014	5	53	Standing on his presidential limousine, Lyndon J	1	0	1	1	1	TRUE	major_paper	DENVERPOST.COM	-0.2012	0.39208443742384	0.013885846190424	0.107394618946143	0.364299951019139	0.00511970765158343	0.00356984145963955	0.0650659380741689	0.0485796592350624	1	0.39208443742384
140	DENVER POST	The Denver Post	Newspaper	ASECTION	NA	September 23, 2015	2015	9	45	WASHINGTON Senate Democrats thwarted a Republica	1	0	1	1	1	TRUE	major_paper	DENVERPOST.COM	-0.2012	0.502906267801192	0.0167427950263831	0.00792979020626204	0.0130545638260391	0.0205520802462021	0.00143751432274909	0.0738777214500046	0.363499267121168	1	0.502906267801192
141	DENVER POST	The Denver Post	Newspaper	PERSPECT	NA	November 11, 2012	2012	11	83	Election 2012: Looking back (and forward) My b	1	0	1	1	1	TRUE	major_paper	DENVERPOST.COM	-0.2012	0.380815290540007	0.0630241933021904	0.0656461227696655	0.0885088905438822	0.0935999490011419	0.0159559534507724	0.274796580022747	0.0176530203695943	1	0.380815290540007
142	DENVER POST	The Denver Post	Newspaper	DTW	NA	August 5, 2012	2012	8	80	Coloradans can expect to see a bill introduced i	1	0	1	1	1	TRUE	major_paper	DENVERPOST.COM	-0.2012	0.0327457945906152	0.220616773294983	0.0792793958046183	0.0390172262174946	0.150742058894449	0.115596251577415	0.285440688102273	0.0765618115181527	7	0.285440688102273
143	DENVER POST	The Denver Post	Newspaper	PERSPECT	NA	June 3, 2012	2012	6	78	In a distortion of science right up there with t	1	0	1	1	1	TRUE	major_paper	DENVERPOST.COM	-0.2012	0.0166686065003577	0.034898861162396	0.218545362321511	0.374848407410281	0.0105026143179132	0.0248905565924422	0.218473042547343	0.101172549147756	4	0.374848407410281
144	DENVER POST	The Denver Post	Newspaper	DTW	NA	November 5, 2017	2017	11	23	HILDALE, UTAH In a place where political contes	1	0	1	1	1	TRUE	major_paper	DENVERPOST.COM	-0.2012	0.164450142331542	0.162664762496667	0.00593354043890932	0.00482393516430941	0.210159709280942	0.205392733687585	0.24480857864461	0.00176659795543554	7	0.24480857864461
145	DENVER POST	The Denver Post	Newspaper	PERSPECT	NA	February 26, 2012	2012	2	74	Colorado civil unions It is in society's best	1	0	1	1	1	TRUE	major_paper	DENVERPOST.COM	-0.2012	0.292536171291568	0.0614265450981513	0.130253256581568	0.0907878840913182	0.0446355748155538	0.0054454985575839	0.290394714090485	0.084520355473772	1	0.292536171291568
146	DENVER POST	The Denver Post	Newspaper	ASECTION	NA	September 8, 2012	2012	9	81	The political conventions behind them and three	0	0	0	1	1	TRUE	major_paper	DENVERPOST.COM	-0.2012	0.494619289701878	0.0635719221803705	0.0129990062660586	0.172107215489258	0.0736310854180085	0.00292300261080797	0.0832572460708475	0.0968912322627709	1	0.494619289701878
147	DENVER POST	The Denver Post	Newspaper	FEATURES	NA	January 21, 2015	2015	1	37	Taking a quick break at his Black Cat Bistro in	1	1	1	1	1	TRUE	major_paper	DENVERPOST.COM	-0.2012	0.0145047519667779	0.073532364070037	0.0399549180969362	0.046144591316113	0.220626375605648	0.104011625189141	0.408981744069986	0.0922436296853616	7	0.408981744069986
148	DENVER POST	The Denver Post	Newspaper	PERSPECT	NA	June 24, 2012	2012	6	78	Monday Driving around, white hair flying In a g	1	0	1	1	1	TRUE	major_paper	DENVERPOST.COM	-0.2012	0.24070495525876	0.221953819367751	0.0404424562811785	0.0210692232934128	0.163979848633118	0.0471894464933835	0.223814027720965	0.040846222951431	1	0.24070495525876
149	DENVER POST	The Denver Post	Newspaper	PERSPECT	NA	February 5, 2012	2012	2	74	The long, um, anticipated Colorado Republican ca	1	0	1	1	1	TRUE	major_paper	DENVERPOST.COM	-0.2012	0.410812733097737	0.00828150560699085	0.0345816640564826	0.140749860865832	0.00643800216110253	0.00668363460068111	0.382564046435043	0.00988855317613008	1	0.410812733097737
150	DENVER POST	The Denver Post	Newspaper	OPINION	NA	October 25, 2012	2012	10	82	"Listen, this just isn't working," a woman says.	1	0	1	1	1	TRUE	major_paper	DENVERPOST.COM	-0.2012	0.260719092636353	0.00961656181141144	0.189294020483884	0.282206502431635	0.00385753536149561	0.0210542315518594	0.161056264608716	0.072195791114646	4	0.282206502431635
151	DENVER POST	The Denver Post	Newspaper	OPINION	NA	January 18, 2014	2014	1	49	Fifty years since President Lyndon Johnson proud	1	0	1	1	1	TRUE	major_paper	DENVERPOST.COM	-0.2012	0.204573551124917	0.0290290621635703	0.20507595557886	0.461491782128768	0.00323599959583306	0.00398435789855159	0.0145596670062319	0.0780496245032689	4	0.461491782128768
152	DENVER POST	The Denver Post	Newspaper	ASECTION	NA	November 15, 2012	2012	11	83	Snowie Buehler's memories of her 9-month-old gr	0	0	0	1	1	TRUE	major_paper	DENVERPOST.COM	-0.2012	0.00715223589208748	0.0997947888944392	0.392300186360747	0.0768749387248451	0.0967129525591261	0.20185908832303	0.110334703572461	0.0149711056732649	3	0.392300186360747
153	DENVER POST	The Denver Post	Newspaper	OPINION	NA	August 4, 2015	2015	8	44	Colorado has much to offer in terms of quality o	1	0	1	1	1	TRUE	major_paper	DENVERPOST.COM	-0.2012	0.00716204182999909	0.0143483037679742	0.388033238434287	0.469004763610545	0.00831476527971011	0.0421669241975855	0.0586301701755967	0.0123397927043025	4	0.469004763610545
154	DENVER POST	The Denver Post	Newspaper	DTW	NA	January 29, 2012	2012	1	73	Counties are changing the way they administer ai	1	0	1	1	1	TRUE	major_paper	DENVERPOST.COM	-0.2012	0.00642183786831261	0.28620689096951	0.481093667408317	0.0913987450188607	0.0336628319628301	0.0184558175250938	0.0753170364236346	0.00744317282344065	3	0.481093667408317
155	DENVER POST	The Denver Post	Newspaper	ASECTION	NA	January 16, 2015	2015	1	37	The Children's Museum of Denver is spending 2015	1	0	1	1	1	TRUE	major_paper	DENVERPOST.COM	-0.2012	0.00789229460033382	0.133653196850164	0.353491941224994	0.0479487722713479	0.187876324647235	0.172124918104803	0.0874890070611836	0.00952354523993902	3	0.353491941224994
156	DENVER POST	The Denver Post	Newspaper	BUSINESS	NA	August 26, 2012	2012	8	80	So far, most of the discussion of Paul Ryan, the	1	0	1	1	1	TRUE	major_paper	DENVERPOST.COM	-0.2012	0.394293351616295	0.00875827148265122	0.0472122583198665	0.1024858848109	0.00387183299358464	0.00681389110627242	0.312297129102504	0.124267380567927	1	0.394293351616295
157	DENVER POST	The Denver Post	Newspaper	ASECTION	NA	January 21, 2013	2013	1	61	Cold Cases Blog Harriet Lawyer-Duvallo had been	1	0	1	1	1	TRUE	major_paper	DENVERPOST.COM	-0.2012	0.0175661810524276	0.140373755310503	0.0185889551385519	0.0192902275915168	0.245921199639061	0.168977187635979	0.385920887339473	0.00336160629248645	7	0.385920887339473
158	DENVER POST	The Denver Post	Newspaper	ASECTION	NA	September 3, 2016	2016	9	33	A summary of the presidential candidates' propos	1	0	1	1	1	TRUE	major_paper	DENVERPOST.COM	-0.2012	0.208956049922099	0.401502953217975	0.0640183173894472	0.0186163082900378	0.0408158367426211	0.00422822690065876	0.0598908831368592	0.201971424400302	2	0.401502953217975
159	DENVER POST	The Denver Post	Newspaper	ASECTION	NA	February 14, 2014	2014	2	50	When Mike Brady opened Pelican Jo's Pizzeria in	1	0	1	1	1	TRUE	major_paper	DENVERPOST.COM	-0.2012	0.0117964456374196	0.256314541436012	0.0636822078574517	0.122757032736886	0.128562301152862	0.0521974897361181	0.208279140090499	0.156410841352752	2	0.256314541436012
160	DENVER POST	The Denver Post	Newspaper	ASECTION	NA	January 21, 2017	2017	1	13	The number of neighbors, friends and relatives w	1	0	1	1	1	TRUE	major_paper	DENVERPOST.COM	-0.2012	0.00882640409010208	0.474727166177684	0.201782109352649	0.0342838496814067	0.040426334032501	0.0714524262477518	0.160870735368622	0.00763097504928341	2	0.474727166177684
161	DENVER POST	The Denver Post	Newspaper	ASECTION	NA	September 11, 2016	2016	9	33	AT LEAST 11 DEAD IN QUAKE IN TANZANIA DAR ES SA	1	0	1	1	1	TRUE	major_paper	DENVERPOST.COM	-0.2012	0.164214647159205	0.272582806367116	0.0152082872637391	0.0387330613357707	0.287247161217693	0.035260387991736	0.145176386995359	0.0415772616693817	5	0.287247161217693
162	DENVER POST	The Denver Post	Newspaper	PERSPECT	NA	June 24, 2012	2012	6	78	Highlights from The Denver Post's opinion pages	1	0	1	1	1	TRUE	major_paper	DENVERPOST.COM	-0.2012	0.254450318705717	0.243766156000663	0.0425714554038621	0.0200332540800466	0.155900160914279	0.0493918867534863	0.199189530748223	0.0346972373937228	1	0.254450318705717
163	DENVER POST	The Denver Post	Newspaper	PERSPECT	NA	September 30, 2012	2012	9	81	Re: "Should pot be legal?" Sept. 23 point-count	1	0	1	1	1	TRUE	major_paper	DENVERPOST.COM	-0.2012	0.277407916539134	0.0654208412901338	0.0222680461751261	0.159544433683466	0.146535180583019	0.0292235123319683	0.282166822662419	0.0174332467347349	7	0.282166822662419
164	DENVER POST	The Denver Post	Newspaper	ASECTION	NA	January 11, 2017	2017	1	13	Colorado improved slightly in its ability to get	1	1	1	1	1	TRUE	major_paper	DENVERPOST.COM	-0.2012	0.00451964221794234	0.159027489953333	0.546729160354645	0.215959040032621	0.0273684515964243	0.0159032894069245	0.021987407207056	0.00850551923105403	3	0.546729160354645
165	DENVER POST	The Denver Post	Newspaper	OPINION	NA	August 1, 2015	2015	8	44	Win win water projects Re: "Major upgrades in s	1	0	1	1	1	TRUE	major_paper	DENVERPOST.COM	-0.2012	0.120778904200266	0.209088551706358	0.134241800067107	0.0763200055708562	0.205985063149113	0.0329393150663231	0.170808667802216	0.0498376924377608	2	0.209088551706358
166	DENVER POST	The Denver Post	Newspaper	ASECTION	NA	November 11, 2012	2012	11	83	In December, Jewish Family Service is asking for	1	0	1	1	1	TRUE	major_paper	DENVERPOST.COM	-0.2012	0.0151892682656344	0.0454932097722178	0.081191548539629	0.0585016594090361	0.0237594359450029	0.398730028863313	0.372013240601641	0.00512160860352613	6	0.398730028863313
167	DENVER POST	The Denver Post	Newspaper	ASECTION	NA	October 12, 2012	2012	10	82	Life looks bleak at the intersection of 33rd and	1	1	1	1	1	TRUE	major_paper	DENVERPOST.COM	-0.2012	0.0121997299719289	0.244094407748491	0.048753533285846	0.0428238345145203	0.157491361142922	0.0641749280391352	0.401564310337197	0.0288978949599601	7	0.401564310337197
168	DENVER POST	The Denver Post	Newspaper	OPINION	NA	January 30, 2012	2012	1	73	When Newt Gingrich began in the last few days to	1	0	1	1	1	TRUE	major_paper	DENVERPOST.COM	-0.2012	0.770432073106836	0.0167586458231237	0.00519862353488089	0.0079612562532814	0.0093008829607897	0.00388103758021917	0.178599891798674	0.00786758894219588	1	0.770432073106836
169	DENVER POST	The Denver Post	Newspaper	SPORTS	NA	January 11, 2015	2015	1	37	Pops was in Cleveland. Then Dad was in Trenton,	1	0	1	1	1	TRUE	major_paper	DENVERPOST.COM	-0.2012	0.0227159317422777	0.0315054471244141	0.00773381166149872	0.00479200578308906	0.100995502940652	0.117715138678477	0.713158125702678	0.00138403636691385	7	0.713158125702678
170	DENVER POST	Denver Post	NA	NA	NA	October 4, 2004	2004	10	178	The company that designed and built Colorado'	1	0	1	1	1	TRUE	major_paper	DENVERPOST.COM	-0.2012	0.0178313680699172	0.424635018540877	0.157086851291529	0.192653727812531	0.0165879915425816	0.00663308131813965	0.133953305742224	0.0506186556822006	2	0.424635018540877
171	DENVER POST	The Denver Post	Newspaper	OPINION	NA	May 1, 2012	2012	5	77	As a practicing Catholic and former Colorado gov	1	0	1	1	1	TRUE	major_paper	DENVERPOST.COM	-0.2012	0.50692816613206	0.0230467932409994	0.168725205053815	0.0185011505066638	0.00772457717048403	0.206650304662054	0.047041849284993	0.0213819539489303	1	0.50692816613206
172	DENVER POST	The Denver Post	Newspaper	ASECTION	NA	June 7, 2017	2017	6	18	NEW YORK A crackdown on illegal immigration unde	1	1	1	1	1	TRUE	major_paper	DENVERPOST.COM	-0.2012	0.0603600679170969	0.332837093056165	0.309270718514794	0.088688057008153	0.02615585061931	0.0726461229947514	0.101498032848572	0.00854405704115757	2	0.332837093056165
173	DENVER POST	The Denver Post	Newspaper	OPINION	NA	February 27, 2014	2014	2	50	It's been oft said that the only two things that	1	1	1	1	1	TRUE	major_paper	DENVERPOST.COM	-0.2012	0.203753376318262	0.023627631560922	0.0836732533987738	0.10252168785169	0.0053830632279194	0.00737819111846812	0.102451622980877	0.471211173543088	8	0.471211173543088
174	DENVER POST	The Denver Post	Newspaper	ASECTION	NA	February 24, 2016	2016	2	26	CLINTON AIDES MUST TESTIFY IN E MAIL CASE WASHI	1	0	1	1	1	TRUE	major_paper	DENVERPOST.COM	-0.2012	0.215676781300286	0.38019188153116	0.0573501191068779	0.0147614101349234	0.239917729964318	0.0254227626594121	0.046880136927978	0.0197991783750449	2	0.38019188153116
175	DENVER POST	The Denver Post	Newspaper	DTW	NA	May 24, 2015	2015	5	41	The housing projects of Denver's Sun Valley look	1	0	1	1	1	TRUE	major_paper	DENVERPOST.COM	-0.2012	0.00779255523830296	0.0406752085716729	0.376678453408731	0.222123191259792	0.0736582011980637	0.160681092637979	0.114275849113826	0.00411544857163304	3	0.376678453408731
176	DENVER POST	The Denver Post	Newspaper	OPINION	NA	April 28, 2015	2015	4	40	Missing the mark on testing Re: "Governors rall	1	0	1	1	1	TRUE	major_paper	DENVERPOST.COM	-0.2012	0.13907806264476	0.153923684181874	0.302059033121634	0.044557361186612	0.0393453028065085	0.0103996050396115	0.267815999669691	0.0428209513493094	3	0.302059033121634
177	DENVER POST	The Denver Post	Newspaper	ASECTION	NA	May 16, 2015	2015	5	41	Kevin Patterson, the new interim CEO of the stat	1	0	1	1	1	TRUE	major_paper	DENVERPOST.COM	-0.2012	0.0337209598600426	0.434129029223536	0.0974675200381895	0.161593757227217	0.0215110843860658	0.00563566206427601	0.143972749577194	0.101969237623479	2	0.434129029223536
178	DENVER POST	The Denver Post	Newspaper	OPINION	NA	January 5, 2016	2016	1	25	We'll be hearing a lot about the middle class in	1	0	1	1	1	TRUE	major_paper	DENVERPOST.COM	-0.2012	0.0267780767752629	0.00386520379710684	0.0155411810832992	0.914604466807998	0.00117569002161829	0.00136378461475127	0.0293018081296297	0.00736978877033424	4	0.914604466807998
179	DENVER POST	The Denver Post	Newspaper	FEATURES	NA	June 19, 2014	2014	6	54	Don't let the title fool you. "Sleep Your Way	1	0	1	1	1	TRUE	major_paper	DENVERPOST.COM	-0.2012	0.0542628724744489	0.146316839359658	0.0137653692818995	0.0642055453102864	0.0435660333381283	0.0811542962136372	0.593125724075909	0.00360331994603264	7	0.593125724075909
180	DENVER POST	The Denver Post	Newspaper	OPINION	NA	May 28, 2015	2015	5	41	I have watched the back and forth between low in	1	0	1	1	1	TRUE	major_paper	DENVERPOST.COM	-0.2012	0.0874181724587604	0.140464430144478	0.404732120291878	0.16362158543757	0.0106977463794431	0.0165476604617774	0.12479424171201	0.0517240431140826	3	0.404732120291878
181	DENVER POST	The Denver Post	Newspaper	ASECTION	NA	November 27, 2015	2015	11	47	RALEIGH, N.C. State troopers suing North Carolin	1	0	1	1	1	TRUE	major_paper	DENVERPOST.COM	-0.2012	0.0580165683040877	0.209026893314252	0.040668291159471	0.286372479854961	0.101002603288396	0.0379739627859065	0.184059901826355	0.0828792994665708	4	0.286372479854961
182	DENVER POST	The Denver Post	Newspaper	ASECTION	NA	July 6, 2012	2012	7	79	GRAND JUNCTION When Robert Dewey walked out of p	1	0	1	1	1	TRUE	major_paper	DENVERPOST.COM	-0.2012	0.0136549069130449	0.238332941629263	0.118185062423063	0.0339162928030515	0.175319619955789	0.14851811712057	0.243534079053476	0.028538980101743	7	0.243534079053476
183	DENVER POST	The Denver Post	Newspaper	OPINION	NA	August 15, 2012	2012	8	80	Mitt Romney's choice of Paul Ryan as running ma	1	0	1	1	1	TRUE	major_paper	DENVERPOST.COM	-0.2012	0.465840271033081	0.0300141015192618	0.0153943675020143	0.028956191700066	0.102643682073335	0.0207907115589001	0.178409523226152	0.15795115138719	1	0.465840271033081
184	DENVER POST	The Denver Post	Newspaper	ASECTION	NA	January 19, 2013	2013	1	61	Joe Freund said his family has been in the ranch	1	0	1	1	1	TRUE	major_paper	DENVERPOST.COM	-0.2012	0.0232770881820596	0.105703312291505	0.0652562301249785	0.165061960940077	0.0101641055729671	0.0107625834085857	0.183686119282689	0.436088600197138	8	0.436088600197138
185	DENVER POST	The Denver Post	Newspaper	OPINION	NA	October 11, 2014	2014	10	58	One of the challenges that advocates are discuss	1	0	1	1	1	TRUE	major_paper	DENVERPOST.COM	-0.2012	0.00680554411705955	0.124057853238274	0.187372129764494	0.432751899191255	0.00679064729800872	0.0314704263443673	0.202136344131638	0.0086151559149035	4	0.432751899191255
186	DENVER POST	The Denver Post	Newspaper	DTW	NA	March 15, 2012	2012	3	75	An analysis of Gov. John Hickenlooper's request	1	0	1	1	1	TRUE	major_paper	DENVERPOST.COM	-0.2012	0.0491165789879443	0.364408792153814	0.173487760022204	0.0380011266642669	0.0185924211779666	0.00796544304854189	0.0983280159312662	0.250099862013996	2	0.364408792153814
187	DENVER POST	The Denver Post	Newspaper	BUSINESS	NA	May 29, 2012	2012	5	77	Think "labor union" and you probably picture guy	1	0	1	1	1	TRUE	major_paper	DENVERPOST.COM	-0.2012	0.478743635681183	0.0971103759972182	0.0120938882453979	0.139520951789626	0.0384287571686293	0.031712471753588	0.196235791464761	0.00615412789959522	1	0.478743635681183
188	DENVER POST	The Denver Post	Newspaper	ASECTION	NA	January 2, 2014	2014	1	49	Just weeks before the September floods hit Color	1	0	1	1	1	TRUE	major_paper	DENVERPOST.COM	-0.2012	0.00580538340972233	0.0577876374485376	0.164330705911898	0.143436436366127	0.0637244579493521	0.403759864631379	0.148540371830734	0.01261514245225	6	0.403759864631379
189	DENVER POST	The Denver Post	Newspaper	Z	NA	January 13, 2016	2016	1	25	House Speaker Dickey Lee Hullinghorst's prepare	1	0	1	1	1	TRUE	major_paper	DENVERPOST.COM	-0.2012	0.168747974892145	0.0892451036819007	0.0814631705144307	0.100213147785134	0.0525814832858645	0.00662125582815776	0.348681635350942	0.152446228661425	7	0.348681635350942
190	DENVER POST	The Denver Post	Newspaper	OPINION	NA	April 22, 2014	2014	4	52	Ballpark area and the homeless Re: "Homeless da	1	0	1	1	1	TRUE	major_paper	DENVERPOST.COM	-0.2012	0.33534548242916	0.120658170553742	0.0225998315745209	0.105362035414466	0.060507370720958	0.0354961954443024	0.297636295123382	0.0223946187394693	1	0.33534548242916
191	DENVER POST	The Denver Post	Newspaper	ASECTION	NA	February 12, 2012	2012	2	74	ATHENS, GREECE Warning of a "catastrophe" that w	1	0	1	1	1	TRUE	major_paper	DENVERPOST.COM	-0.2012	0.432984697124833	0.0491059318641222	0.0221481028564257	0.206705083745299	0.0126935160925323	0.00119222549083483	0.0368974358678306	0.238273006958122	1	0.432984697124833
192	DENVER POST	The Denver Post	Newspaper	PERSPECT	NA	March 16, 2014	2014	3	51	Someone who is determined to disbelieve somethin	1	0	1	1	1	TRUE	major_paper	DENVERPOST.COM	-0.2012	0.0388203344686443	0.0416121249161203	0.223567959423597	0.467652790103423	0.0216756143742219	0.00598467504051425	0.0435019028908702	0.157184598782609	4	0.467652790103423
193	DENVER POST	The Denver Post	Newspaper	ASECTION	NA	March 4, 2013	2013	3	63	Despite hints of a rebound in some sectors of th	1	0	1	1	1	TRUE	major_paper	DENVERPOST.COM	-0.2012	0.0134624741268341	0.0556110408163921	0.338728152100753	0.50955960546903	0.00822053823388201	0.0151561774607638	0.0383276062041509	0.0209344055881946	4	0.50955960546903
194	DENVER POST	The Denver Post	Newspaper	ASECTION	NA	February 5, 2014	2014	2	50	WASHINGTON Capping three years of dramatic parti	1	1	1	1	1	TRUE	major_paper	DENVERPOST.COM	-0.2012	0.0357031294937899	0.056482509272332	0.0844016281607929	0.0256029598947139	0.0807664982692599	0.00517502835786105	0.081178916278619	0.630689330272631	8	0.630689330272631
195	DENVER POST	The Denver Post	Newspaper	DTW	NA	May 24, 2015	2015	5	41	SAN LUIS VALLEY Thin shafts of light filter thro	1	0	1	1	1	TRUE	major_paper	DENVERPOST.COM	-0.2012	0.00494382067701883	0.0293813446412442	0.0378372120759966	0.0375679560073312	0.188730086415221	0.383667074255383	0.316357110115771	0.00151539581203398	6	0.383667074255383
196	DENVER POST	The Denver Post	Newspaper	BUSINESS	NA	March 31, 2017	2017	3	15	As the joys of spring break come to an end, it's	1	0	1	1	1	TRUE	major_paper	DENVERPOST.COM	-0.2012	0.00610125508536143	0.169788724330096	0.258207975646771	0.163827970694739	0.157064585822832	0.0862638588755797	0.154862804996534	0.0038828245480862	3	0.258207975646771
197	DENVER POST	The Denver Post	Newspaper	FEATURES	NA	June 12, 2014	2014	6	54	The study topic for Coterie's 99th year was "Fai	1	0	1	1	1	TRUE	major_paper	DENVERPOST.COM	-0.2012	0.216961495104041	0.138676700898577	0.0491344462773729	0.0376123435145493	0.230185308753497	0.205226628006931	0.111087909167721	0.0111151682773112	5	0.230185308753497
198	DENVER POST	The Denver Post	Newspaper	OPINION	NA	October 2, 2017	2017	10	22	Last year, I proposed a handy rule of thumb for	1	0	1	1	1	TRUE	major_paper	DENVERPOST.COM	-0.2012	0.130467534729199	0.0349721054308255	0.020736785253281	0.362640867355473	0.00509634679383794	0.00179733572356785	0.147550326139239	0.296738698574577	4	0.362640867355473
199	DENVER POST	The Denver Post	Newspaper	OPINION	NA	October 18, 2014	2014	10	58	Obama and the midterms Re: "Obama a factor in C	1	0	1	1	1	TRUE	major_paper	DENVERPOST.COM	-0.2012	0.442623319983081	0.0712251320304126	0.0589576934632313	0.131348868896173	0.0300546041210508	0.00840565533442759	0.202227650035426	0.0551570761361982	1	0.442623319983081
200	DENVER POST	The Denver Post	Newspaper	DTW	NA	April 2, 2017	2017	4	16	When it comes to federal money, Denver relies o	1	0	1	1	1	TRUE	major_paper	DENVERPOST.COM	-0.2012	0.0621736723378722	0.457985017453867	0.167881779136868	0.0242355006495429	0.0717861681001855	0.00686675181981944	0.0611174886282776	0.147953621873567	2	0.457985017453867
201	DENVER POST	The Denver Post	Newspaper	ASECTION	NA	December 18, 2012	2012	12	84	As a shattered economy drained money from state	1	0	1	1	1	TRUE	major_paper	DENVERPOST.COM	-0.2012	0.0322144051459023	0.033270725765363	0.453842590107517	0.217830634735761	0.00479063393945744	0.00889874472986776	0.0592366779301064	0.189915587646026	3	0.453842590107517
202	DENVER POST	The Denver Post	Newspaper	ASECTION	NA	January 9, 2014	2014	1	49	AURORA Little Joel Fernandez had some respirator	1	0	1	1	1	TRUE	major_paper	DENVERPOST.COM	-0.2012	0.00349261825376013	0.117457278212554	0.223654574882225	0.0375700447818184	0.0294798921159253	0.540942983086392	0.0419750699817644	0.00542753868556105	6	0.540942983086392
203	DENVER POST	The Denver Post	Newspaper	PERSPECT	NA	July 20, 2014	2014	7	55	Calling for the United States to produce more co	1	0	1	1	1	TRUE	major_paper	DENVERPOST.COM	-0.2012	0.0223368363536872	0.0299552620012862	0.0746919158129436	0.377642720142822	0.012908305035872	0.291750557098926	0.182181086435329	0.00853331711913376	4	0.377642720142822
204	DENVER POST	The Denver Post	Newspaper	OPINION	NA	October 25, 2012	2012	10	82	Most Americans view "Mad Men" as an entertaining	1	0	1	1	1	TRUE	major_paper	DENVERPOST.COM	-0.2012	0.209182694058422	0.0265375142785306	0.287751209695792	0.110880589848796	0.0149914827243435	0.0263960098286149	0.140941490964084	0.183319008601415	3	0.287751209695792
205	DENVER POST	The Denver Post	Newspaper	OPINION	NA	June 26, 2013	2013	6	66	Letting transgender child use the girls' room R	1	1	1	1	1	TRUE	major_paper	DENVERPOST.COM	-0.2012	0.0996979173163874	0.0825122366995456	0.140787503246791	0.0178696057643837	0.127555986473883	0.110944563030132	0.363740707614065	0.0568914798548116	7	0.363740707614065
206	DENVER POST	The Denver Post	Newspaper	ASECTION	NA	May 24, 2017	2017	5	17	Colorado Gov. John Hickenlooper on Tuesday slamm	1	0	1	1	1	TRUE	major_paper	DENVERPOST.COM	-0.2012	0.187678728185209	0.0227344566603458	0.0344375558339503	0.156535354640317	0.0135863751212546	0.00291979919053664	0.0990175098661762	0.48309022050221	8	0.48309022050221
207	DENVER POST	The Denver Post	Newspaper	ASECTION	NA	December 1, 2017	2017	12	24	The steep drop in teen pregnancies and abortions	1	0	1	1	1	TRUE	major_paper	DENVERPOST.COM	-0.2012	0.00875870660427099	0.0741580508767441	0.43902809189602	0.200753277445522	0.0482992377133187	0.0872727249247729	0.131063634638	0.0106662759013515	3	0.43902809189602
208	DENVER POST	The Denver Post	Newspaper	ASECTION	NA	August 10, 2016	2016	8	32	Colorado's national reputation for helping the n	1	0	1	1	1	TRUE	major_paper	DENVERPOST.COM	-0.2012	0.0194463768503295	0.0575050764302827	0.644639697835064	0.165273224226452	0.0149012085529682	0.0148671846808599	0.0704496067694627	0.0129176246545813	3	0.644639697835064
209	DENVER POST	The Denver Post	Newspaper	BUSINESS	NA	September 17, 2014	2014	9	57	The poverty rate in the U.S. has dropped for the	1	0	1	1	1	TRUE	major_paper	DENVERPOST.COM	-0.2012	0.0103152356785253	0.0234758893444645	0.0537644259788678	0.883662613897108	0.00357819445424912	0.00232605252969675	0.0125505795762671	0.010327008540822	4	0.883662613897108
210	DENVER POST	The Denver Post	Newspaper	ASECTION	NA	December 12, 2016	2016	12	36	Before diving into this year's holiday feast, ta	1	0	1	1	1	TRUE	major_paper	DENVERPOST.COM	-0.2012	0.00283077284581533	0.198239348295542	0.0203947342778785	0.0139004844763308	0.0836243681339032	0.419514397474147	0.260544800000358	0.000951094496025336	6	0.419514397474147
211	DENVER POST	The Denver Post	Newspaper	PERSPECT	NA	June 15, 2014	2014	6	54	Brilena McGlochlin sits on the earth toned couc	1	0	1	1	1	TRUE	major_paper	DENVERPOST.COM	-0.2012	0.0452857522783406	0.0307109633568038	0.0816705655661381	0.484805041335847	0.0269012688530743	0.0985953125315407	0.210622245098455	0.0214088509798008	4	0.484805041335847
212	DENVER POST	The Denver Post	Newspaper	ASECTION	NA	January 31, 2015	2015	1	37	Welfare money or food stamps for marijuana? It's	1	0	1	1	1	TRUE	major_paper	DENVERPOST.COM	-0.2012	0.0320812075119732	0.306386146756619	0.165381826090929	0.0297583014103976	0.143053535001939	0.0130326341228636	0.135399959493276	0.174906389612003	2	0.306386146756619
213	DENVER POST	The Denver Post	Newspaper	ASECTION	NA	July 18, 2017	2017	7	19	Affordable produce just arrived in two Denver ne	0	1	1	1	1	TRUE	major_paper	DENVERPOST.COM	-0.2012	0.0144599098516221	0.324323955504198	0.127863307922602	0.0460586074130909	0.144777421197092	0.0193076769132638	0.260593645097312	0.0626154761008195	2	0.324323955504198
214	DENVER POST	The Denver Post	Newspaper	DTW	NA	August 20, 2017	2017	8	20	The painstaking work of speeding up Denver's gov	1	0	1	1	1	TRUE	major_paper	DENVERPOST.COM	-0.2012	0.00756983832336451	0.363128723025893	0.0580112358034704	0.201740539393289	0.0895408194187475	0.0218804001630473	0.21062742880784	0.047501015064349	2	0.363128723025893
215	DENVER POST	The Denver Post	Newspaper	FEATURES	NA	October 7, 2012	2012	10	82	And the winner is...a loading dock? That's not	1	0	1	1	1	TRUE	major_paper	DENVERPOST.COM	-0.2012	0.0109818360060264	0.221850858616447	0.0117472589407989	0.0285160831580828	0.160863355391088	0.0562334686643151	0.50592807960265	0.00387905962059176	7	0.50592807960265
216	DENVER POST	The Denver Post	Newspaper	ASECTION	NA	October 30, 2016	2016	10	34	Last year, $2.29 million was distributed to 49	1	1	1	1	1	TRUE	major_paper	DENVERPOST.COM	-0.2012	0.000901636498825395	0.0773307476054431	0.443716523047882	0.0501160798761725	0.0951786321381616	0.323910147311792	0.00751517197014724	0.00133106155157581	3	0.443716523047882
217	DENVER POST	The Denver Post	Newspaper	ASECTION	NA	January 16, 2014	2014	1	49	A bill that would have blocked the use of public	1	0	1	1	1	TRUE	major_paper	DENVERPOST.COM	-0.2012	0.054398356275874	0.437278647314658	0.0590725245230539	0.0204494375652223	0.15424554904942	0.00820238774773775	0.0402288405387443	0.22612425698529	2	0.437278647314658
218	DENVER POST	The Denver Post	Newspaper	ASECTION	NA	January 15, 2014	2014	1	49	It had the makings of must read story: A Republi	1	0	1	1	1	TRUE	major_paper	DENVERPOST.COM	-0.2012	0.0915428105746902	0.255594098442392	0.0815350280876712	0.0151359584307465	0.179671562726139	0.0101701272485183	0.157275591836554	0.209074822653288	2	0.255594098442392
219	DENVER POST	The Denver Post	Newspaper	PERSPECT	NA	July 20, 2014	2014	7	55	In their denouncements of the Supreme Court's Ho	1	0	1	1	1	TRUE	major_paper	DENVERPOST.COM	-0.2012	0.391136562938366	0.0143927494872295	0.142805106554475	0.203779110348803	0.00411789321980757	0.00988304492129787	0.212709631132089	0.0211759013979318	1	0.391136562938366
220	DENVER POST	The Denver Post	Newspaper	PERSPECT	NA	August 2, 2015	2015	8	44	Amelia Dubois, 32, had two children and an abusi	0	0	0	1	1	TRUE	major_paper	DENVERPOST.COM	-0.2012	0.0159360520351775	0.0434859649830434	0.402050472180946	0.239719167271825	0.00746172777868353	0.048754593488747	0.22554066198344	0.0170513602781362	3	0.402050472180946
221	DENVER POST	The Denver Post	Newspaper	ASECTION	NA	November 6, 2012	2012	11	83	WASHINGTON Suspense over the too-close-to-call p	1	0	1	1	1	TRUE	major_paper	DENVERPOST.COM	-0.2012	0.472822643603925	0.0120065978866915	0.0155805357945376	0.127545021852427	0.00321792775040779	0.000972836234287867	0.0853977869966445	0.282456649881079	1	0.472822643603925
222	DENVER POST	The Denver Post	Newspaper	DTW	NA	November 16, 2014	2014	11	59	Thanks to the passage of House Bill 13 1006 in 2	1	0	1	1	1	TRUE	major_paper	DENVERPOST.COM	-0.2012	0.0117418969447105	0.0769003292513959	0.484828442302694	0.0495033302833744	0.0117982106964211	0.0222871884813468	0.318844200053853	0.0240964019862048	3	0.484828442302694
223	DENVER POST	The Denver Post	Newspaper	OPINION	NA	May 26, 2012	2012	5	77	More than 46 million Americans get federal food	1	1	1	1	1	TRUE	major_paper	DENVERPOST.COM	-0.2012	0.0596805925730708	0.476885872584569	0.34910905589393	0.028348595372588	0.0116240938685056	0.00526468074343316	0.0352850065379207	0.0338021024259836	2	0.476885872584569
224	DENVER POST	The Denver Post	Newspaper	ASECTION	NA	November 1, 2015	2015	11	47	For all of Colorado's outward prosperity, hunger	1	0	1	1	1	TRUE	major_paper	DENVERPOST.COM	-0.2012	0.008306482524247	0.124605913672893	0.43678624325863	0.127056111338322	0.0568510782425552	0.0499862793210176	0.187859402527583	0.00854848911475239	3	0.43678624325863
225	DENVER POST	The Denver Post	Newspaper	BUSINESS	NA	June 7, 2017	2017	6	18	Amazon is making a play for low income shoppers.	1	0	1	1	1	TRUE	major_paper	DENVERPOST.COM	-0.2012	0.0455970207841415	0.305584255257334	0.186395240747561	0.306788019550435	0.0420437097193791	0.0124387575501105	0.0736254354128599	0.0275275609781787	4	0.306788019550435
226	DENVER POST	The Denver Post	Newspaper	ASECTION	NA	June 21, 2013	2013	6	66	WASHINGTON Call it the contradictory or confound	1	0	1	1	1	TRUE	major_paper	DENVERPOST.COM	-0.2012	0.157355606933821	0.0292229687237286	0.0546742418007237	0.0208733352099859	0.0381994206920774	0.00550079493310358	0.177767221560025	0.516406410146535	8	0.516406410146535
227	DENVER POST	The Denver Post	Newspaper	OPINION	NA	July 19, 2017	2017	7	19	Senate Majority Leader Mitch McConnell suggested	1	0	1	1	1	TRUE	major_paper	DENVERPOST.COM	-0.2012	0.32822071100787	0.012871256744707	0.0151551865888661	0.0209652176111217	0.00485674939211087	0.00188647565163812	0.144868904725575	0.471175498278112	8	0.471175498278112
228	DENVER POST	The Denver Post	Newspaper	BUSINESS	NA	April 29, 2012	2012	4	76	The Washington of conventional wisdom and the re	1	0	1	1	1	TRUE	major_paper	DENVERPOST.COM	-0.2012	0.201090158448962	0.00958425663391476	0.0397131580719119	0.438511553550847	0.00165379275329562	0.000682190921846799	0.0323734957735275	0.276391393845694	4	0.438511553550847
229	DENVER POST	The Denver Post	Newspaper	ASECTION	NA	April 15, 2014	2014	4	52	NEW YORK The Washington Post and The Guardian w	1	0	1	1	1	TRUE	major_paper	DENVERPOST.COM	-0.2012	0.326774202103352	0.254415042185639	0.012223068745709	0.0362655148870283	0.185545412923303	0.0277108771200404	0.149204958908363	0.00786092312656626	1	0.326774202103352
230	DENVER POST	The Denver Post	Newspaper	BUSINESS	NA	March 24, 2015	2015	3	39	A Colorado House committee passed two bills Mond	1	0	1	1	1	TRUE	major_paper	DENVERPOST.COM	-0.2012	0.171980284097563	0.045188033221476	0.136417002405646	0.400466325795153	0.0100852660688844	0.0063457110983682	0.125502648697524	0.104014728615386	4	0.400466325795153
231	DENVER POST	The Denver Post	Newspaper	ASECTION	NA	May 13, 2013	2013	5	65	Most of Denver's food trucks serve cupcakes, tac	1	0	1	1	1	TRUE	major_paper	DENVERPOST.COM	-0.2012	0.00837046043252885	0.223503636390424	0.244848541433283	0.0275941788319628	0.205310809262725	0.1437960638566	0.141084596384974	0.00549171340750214	3	0.244848541433283
232	DENVER POST	The Denver Post	Newspaper	OPINION	NA	September 10, 2012	2012	9	81	CU candidate wrong on Pell Grants as student deb	1	0	1	1	1	TRUE	major_paper	DENVERPOST.COM	-0.2012	0.305699807375966	0.0527312227559979	0.179240880838146	0.0722034238987951	0.056743327322236	0.0332691427679574	0.0939789873089957	0.206133207731906	1	0.305699807375966
233	DENVER POST	The Denver Post	Newspaper	ASECTION	NA	January 27, 2014	2014	1	49	Maiysha Sm ith, a 30 year old mother who works a	1	0	1	1	1	TRUE	major_paper	DENVERPOST.COM	-0.2012	0.0296527428268957	0.084156247758563	0.142898247150849	0.260061145455845	0.0786854244877301	0.254559119769755	0.137425489570105	0.012561582980258	4	0.260061145455845
234	DENVER POST	The Denver Post	Newspaper	OPINION	NA	July 15, 2016	2016	7	31	Re: "A need for seed; Denver cuts funding for Ur	1	0	1	1	1	TRUE	major_paper	DENVERPOST.COM	-0.2012	0.0383964288370373	0.0476827450230538	0.338529313831054	0.0611923108751943	0.0903193326229943	0.0454273262683349	0.318235514920658	0.0602170276216733	3	0.338529313831054
235	DENVER POST	The Denver Post	Newspaper	DTW	NA	September 27, 2015	2015	9	45	Clergy and members of the public and congregatio	1	0	1	1	1	TRUE	major_paper	DENVERPOST.COM	-0.2012	0.110715120960302	0.245416454647375	0.0592722646380037	0.0333090960537844	0.141575151161177	0.16588025183018	0.236917821088953	0.00691383962022517	2	0.245416454647375
236	DENVER POST	The Denver Post	Newspaper	ASECTION	NA	August 31, 2016	2016	8	32	The FBI thinks that Lyle Jeffs, the polygamist r	1	0	1	1	1	TRUE	major_paper	DENVERPOST.COM	-0.2012	0.145667883188126	0.420346241523764	0.0183088078935335	0.0196003622627374	0.214677305161893	0.0228139620319549	0.144213258397589	0.0143721795404025	2	0.420346241523764
237	DENVER POST	The Denver Post	Newspaper	PERSPECT	NA	February 16, 2014	2014	2	50	Arts and culture Winner: Alice M. Zrebiec, cu	1	0	1	1	1	TRUE	major_paper	DENVERPOST.COM	-0.2012	0.102247080842117	0.240254606101103	0.0434975326780752	0.0363592202533101	0.311357400408794	0.023911489497354	0.195175408022523	0.0471972621967234	5	0.311357400408794
238	DENVER POST	The Denver Post	Newspaper	ASECTION	NA	January 29, 2016	2016	1	25	Just more than half of Coloradans eligible for f	1	1	1	1	1	TRUE	major_paper	DENVERPOST.COM	-0.2012	0.00647754865408041	0.193226193410518	0.533081712851601	0.203278887109457	0.0316886017124785	0.0069458681461408	0.0163329419508967	0.00896824616482914	3	0.533081712851601
239	DENVER POST	The Denver Post	Newspaper	ASECTION	NA	June 23, 2013	2013	6	66	Colorado Votes Here's how some major bills fare	1	0	1	1	1	TRUE	major_paper	DENVERPOST.COM	-0.2012	0.0347518710083781	0.177379122950439	0.0375591749823219	0.0118144061724479	0.0346494546409268	0.00116801736045577	0.0112834558473727	0.691394497037658	8	0.691394497037658
240	DENVER POST	The Denver Post	Newspaper	DTW	NA	November 27, 2016	2016	11	35	It was 22 degrees in Denver on the night Melvin	1	0	1	1	1	TRUE	major_paper	DENVERPOST.COM	-0.2012	0.00340483552974963	0.109704907099756	0.0333048804826472	0.00786977087779145	0.155792059351506	0.431859310407282	0.257143811901705	0.000920424349563009	6	0.431859310407282
241	DENVER POST	The Denver Post	Newspaper	OPINION	NA	October 12, 2017	2017	10	22	Re: "A sound plan to save PERA," Oct. 1 editoria	1	0	1	1	1	TRUE	major_paper	DENVERPOST.COM	-0.2012	0.0554843304687741	0.0829239437982631	0.0701526625070665	0.494171335149552	0.0319113946345949	0.0094133454678026	0.162028396345685	0.0939145916282616	4	0.494171335149552
242	DENVER POST	The Denver Post	Newspaper	ASECTION	NA	August 25, 2012	2012	8	80	Republicans have two major missions as they gath	1	0	1	1	1	TRUE	major_paper	DENVERPOST.COM	-0.2012	0.705063678852273	0.0197399236616121	0.00798299542258064	0.0113985235791842	0.0520485897959584	0.00271521504437164	0.106866098294694	0.0941849753493265	1	0.705063678852273
243	DENVER POST	The Denver Post	Newspaper	ASECTION	NA	March 3, 2014	2014	3	51	Two years after Colorado spent more than $35 mil	1	0	1	1	1	TRUE	major_paper	DENVERPOST.COM	-0.2012	0.00745907063307268	0.50754897218864	0.349201266605357	0.0243200174308365	0.00783968049341215	0.00900678613074392	0.0283140139177099	0.0663101926002282	2	0.50754897218864
244	DENVER POST	The Denver Post	Newspaper	FEATURES	NA	May 5, 2014	2014	5	53	Find the market for you Spring has sprung, and	1	1	1	1	1	TRUE	major_paper	DENVERPOST.COM	-0.2012	0.00932686248081305	0.336349759753524	0.0148672360224269	0.0210530347678798	0.0579377960425234	0.0224112254856906	0.533591327125382	0.00446275832175976	7	0.533591327125382
245	DENVER POST	The Denver Post	Newspaper	OPINION	NA	September 7, 2017	2017	9	21	Re: "Feel good ideas that need a hardheaded exam	1	0	1	1	1	TRUE	major_paper	DENVERPOST.COM	-0.2012	0.0761729886269647	0.025298933333097	0.0600195606831507	0.330255434485949	0.017738492973479	0.019476311935293	0.418826631797432	0.0522116461646346	7	0.418826631797432
246	DENVER POST	The Denver Post	Newspaper	OPINION	NA	February 20, 2016	2016	2	26	Gravity waves discovery is huge Re: "Physics di	1	0	1	1	1	TRUE	major_paper	DENVERPOST.COM	-0.2012	0.271175776285248	0.0354513217219815	0.235173804485804	0.126519323077175	0.1180064200901	0.0145297345788504	0.14690080628798	0.052242813472862	1	0.271175776285248
247	DENVER POST	The Denver Post	Newspaper	ASECTION	NA	March 28, 2014	2014	3	51	Like most gardeners, state Sen. Lucia Guzman nur	1	0	1	1	1	TRUE	major_paper	DENVERPOST.COM	-0.2012	0.0156828692191129	0.0325763115469528	0.0083761643121543	0.0250954506654441	0.0968250267217867	0.113255134497697	0.691219342884432	0.0169697001524194	7	0.691219342884432
248	DENVER POST	The Denver Post	Newspaper	OPINION	NA	June 17, 2013	2013	6	66	The latest version of broad legislation defining	1	0	1	1	1	TRUE	major_paper	DENVERPOST.COM	-0.2012	0.0638215007298338	0.0189647295000081	0.0880245088752728	0.0785977057832314	0.00533333339972981	0.016479589893942	0.113772696869973	0.615005934948009	8	0.615005934948009
249	DENVER POST	The Denver Post	Newspaper	PERSPECT	NA	June 14, 2015	2015	6	42	City Council's approval of Crestmoor Park rezon	1	0	1	1	1	TRUE	major_paper	DENVERPOST.COM	-0.2012	0.12447180559613	0.251795339178415	0.00881026544009106	0.148493297208702	0.168358613904505	0.0068477316155109	0.198166659773279	0.0930562872833667	2	0.251795339178415
250	LOS ANGELES TIMES	Los Angeles Times	Column		NA	December 31, 2017	2017	12	24	The U.S. economy was the feel-good story of 201	1	0	1	1	1	TRUE	major_paper	LATIMES.COM	-0.3995	0.094613451931503	0.013491692708826	0.0438724799117695	0.466672439390261	0.00407789153036566	0.00815293700713623	0.0536797478620086	0.315439359658131	4	0.466672439390261
251	LOS ANGELES TIMES	Los Angeles Times	Lead story; Infographic		NA	September 13, 2017	2017	9	21	DATELINE: WASHINGTON After a long period of pl	1	0	1	1	1	TRUE	major_paper	LATIMES.COM	-0.3995	0.0520954522409385	0.0151540855889683	0.024163268850456	0.85700836783339	0.00205987143043884	0.00277152545205565	0.0292094438976265	0.0175379847061268	4	0.85700836783339
252	LOS ANGELES TIMES	Los Angeles Times	Newspaper		NA	October 2, 2017	2017	10	22	UC Irvine student Ernest Devin Rankin grew up in	1	0	1	1	1	TRUE	major_paper	LATIMES.COM	-0.3995	0.00723493696401778	0.115384438104572	0.109843975155879	0.0950188382592904	0.0184618184868705	0.215084661974544	0.39096987040369	0.0480014606511368	7	0.39096987040369
253	LOS ANGELES TIMES	Los Angeles Times	Wire		NA	November 23, 2017	2017	11	23	Will shoppers really spend more this holiday sea	1	0	1	1	1	TRUE	major_paper	LATIMES.COM	-0.3995	0.00533099056946751	0.0568269245953796	0.0179413447177208	0.676777577319646	0.00817385473474724	0.0807153095018288	0.0502461202945197	0.10398787826669	4	0.676777577319646
254	LOS ANGELES TIMES	Los Angeles Times	Newspaper		NA	December 21, 2017	2017	12	24	DATELINE: VENTURA When Tiffany Fariseo returne	1	0	1	1	1	TRUE	major_paper	LATIMES.COM	-0.3995	0.00414610905366872	0.149904950001617	0.00593354818225744	0.0299416946448061	0.259384487543413	0.237568444825903	0.311201788731179	0.00191897701715521	7	0.311201788731179
255	LOS ANGELES TIMES	Los Angeles Times	Infographic		NA	September 23, 2017	2017	9	21	DATELINE: LAKEWOOD, N.J. It was a spectacle n	1	0	1	1	1	TRUE	major_paper	LATIMES.COM	-0.3995	0.126894557647355	0.120950400038811	0.147634175308811	0.0966348611875541	0.0875912078856963	0.242461050670291	0.171208778213915	0.00662496904756744	6	0.242461050670291
256	LOS ANGELES TIMES	Los Angeles Times	Newspaper		NA	September 13, 2017	2017	9	21	DATELINE: IMMOKALEE, FLA. Petrona Nunez cradl	1	0	1	1	1	TRUE	major_paper	LATIMES.COM	-0.3995	0.00427230285907701	0.118332257704571	0.0052042340094146	0.0558603345186643	0.229186389389938	0.245595187911657	0.338982397246458	0.0025668963602214	7	0.338982397246458
257	LOS ANGELES TIMES	Los Angeles Times	Newspaper		NA	October 4, 2017	2017	10	22	DATELINE: FORT LAUDERDALE, FLA. Throngs of Pu	1	0	1	1	1	TRUE	major_paper	LATIMES.COM	-0.3995	0.00941053269582814	0.247479273432158	0.00610909692121044	0.00603831175779991	0.166255163419505	0.287057514819941	0.27623536179159	0.00141474516196819	6	0.287057514819941
258	LOS ANGELES TIMES	Los Angeles Times	Column	BUSINESS	NA	November 22, 2017	2017	11	23	The devastating effect that many provisions of	1	0	1	1	1	TRUE	major_paper	LATIMES.COM	-0.3995	0.00993121251575696	0.00792966702860117	0.0262159486947304	0.588827729865182	0.00149026035627616	0.00319345394516082	0.12142974633314	0.240981981261153	4	0.588827729865182
259	LOS ANGELES TIMES	Los Angeles Times	Series; Infographic		NA	December 2, 2017	2017	12	24	DATELINE: MALINALCO, MEXICO As the cell door	1	0	1	1	1	TRUE	major_paper	LATIMES.COM	-0.3995	0.0308926147661491	0.0740632402739916	0.0114168405063993	0.0406132045916372	0.065150810379196	0.199204807010748	0.577066638440806	0.00159184403107224	7	0.577066638440806
260	LOS ANGELES TIMES	Los Angeles Times	Newspaper		NA	December 23, 2017	2017	12	24	DATELINE: WASHINGTON After a year of legislat	1	0	1	1	1	TRUE	major_paper	LATIMES.COM	-0.3995	0.451348710709831	0.00796432128285077	0.0267379233773535	0.0379019065469882	0.00264767610270686	0.00326504774064054	0.12923246978882	0.340901944450809	1	0.451348710709831
261	NEW YORK POST	The New York Post	NA	All Editions	NA	August 4, 1999	1999	8	236	"I am very happy for me and my cousin. We can wo	1	0	1	1	1	TRUE	major_paper	NYPOST.COM	0.2497	0.00594675193673476	0.125174860531689	0.0420795316076946	0.0275542077946994	0.0239080969469918	0.491522892161537	0.281756375845706	0.00205728317494739	6	0.491522892161537
262	NEW YORK POST	The New York Post	Newspaper	All Editions	NA	March 13, 2009	2009	3	111	THE addict faced the judge in a $1,000 suit, loo	1	0	1	1	1	TRUE	major_paper	NYPOST.COM	0.2497	0.0174301962922519	0.111666400422059	0.0117456350279104	0.0116552237742079	0.0433090006853538	0.0849529098659965	0.711291411268235	0.00794922266398507	7	0.711291411268235
263	NEW YORK POST	The New York Post	Newspaper	All Editions	NA	February 12, 2016	2016	2	26	The Issue: Bernie Sanders' insurgent campaign fo	1	0	1	1	1	TRUE	major_paper	NYPOST.COM	0.2497	0.408228316592103	0.0292285242290633	0.113933631883689	0.0712742946438766	0.050853668442969	0.0589705765788314	0.24627078109976	0.021240206529708	1	0.408228316592103
264	NEW YORK POST	The New York Post	Newspaper	Sports+Late City Final	NA	September 6, 2010	2010	9	105	Major city infrastructure projects undertaken as	1	0	1	1	1	TRUE	major_paper	NYPOST.COM	0.2497	0.00738832332891616	0.38058595286397	0.062935050643759	0.194914304802671	0.0503241389342854	0.0434053996577678	0.034266986572369	0.226179843196262	2	0.38058595286397
265	NEW YORK POST	The New York Post	Newspaper	All Editions	NA	September 26, 2005	2005	9	165	Feeling nostalgic for the old days - when crime	1	0	1	1	1	TRUE	major_paper	NYPOST.COM	0.2497	0.124902055612577	0.337647610688389	0.0931381308868573	0.0365665587020801	0.0183410100504535	0.0137808499303165	0.348023548894821	0.0276002352345057	7	0.348023548894821
266	NEW YORK POST	The New York Post	NA	All Editions	NA	February 14, 1999	1999	2	230	Human Resources Administration Commissioner Jaso	1	0	1	1	1	TRUE	major_paper	NYPOST.COM	0.2497	0.101107668650448	0.433621675017277	0.158920189113146	0.0458574324901025	0.0120621929685303	0.0173247693573761	0.205640074423762	0.0254659979793581	2	0.433621675017277
267	NEW YORK POST	The New York Post	Newspaper	All Editions	NA	April 25, 2016	2016	4	28	NAPLES. Not la città in Italy's boot. I'm talkin	1	0	1	1	1	TRUE	major_paper	NYPOST.COM	0.2497	0.0278122619834279	0.0604186761157897	0.010011751248909	0.0415674452880103	0.24358318708767	0.0742210264307695	0.511586046267442	0.030799605577982	7	0.511586046267442
268	NEW YORK POST	The New York Post	Newspaper	All Editions	NA	December 1, 2010	2010	12	108	A divided Congress let unemployment benefits for	1	0	1	1	1	TRUE	major_paper	NYPOST.COM	0.2497	0.0164906660250509	0.200224579998252	0.263192484234366	0.188081174827091	0.00695160063300204	0.0621689039467282	0.0727812416384262	0.190109348697084	3	0.263192484234366
269	NEW YORK POST	The New York Post	Newspaper	All Editions	NA	October 3, 2010	2010	10	106	Now that we know the condition we're in, what ca	1	0	1	1	1	TRUE	major_paper	NYPOST.COM	0.2497	0.00534761382907343	0.134328112883916	0.0168483375830726	0.495617157832872	0.0107231093361706	0.074345308362816	0.259885731537123	0.0029046286349565	4	0.495617157832872
270	NEW YORK POST	The New York Post	NA	All Editions	NA	February 5, 1999	1999	2	230	Eternal vigilance is the price of real welfare r	1	0	1	1	1	TRUE	major_paper	NYPOST.COM	0.2497	0.0331919638143477	0.154417489027423	0.298810899758936	0.249411229191702	0.0063292085709222	0.0323812113136866	0.179849259484711	0.0456087388382703	3	0.298810899758936
271	NEW YORK POST	The New York Post	Newspaper		NA	November 19, 2005	2005	11	167	Tiny Sierra Roberts was little more than a meal	1	0	1	1	1	TRUE	major_paper	NYPOST.COM	0.2497	0.00550184446433819	0.185943910694182	0.0125698532512973	0.00476176211336599	0.207851712066052	0.456459351020308	0.126037132284501	0.00087443410595548	6	0.456459351020308
272	NEW YORK POST	The New York Post	Newspaper	All Editions	NA	May 31, 2009	2009	5	113	MTV is sitting pretty crazy CLASHING egos have	1	0	1	1	1	TRUE	major_paper	NYPOST.COM	0.2497	0.0343409779582393	0.176446772874708	0.00916537972759131	0.0131320927230819	0.199948253545133	0.039369304341361	0.518160080646703	0.00943713818318154	7	0.518160080646703
273	NEW YORK POST	The New York Post	Newspaper	All Editions	NA	March 7, 2015	2015	3	39	The Issue: Whether Gov. Cuomo should take on the	1	0	1	1	1	TRUE	major_paper	NYPOST.COM	0.2497	0.196815776464456	0.0440816273459973	0.177031037999518	0.0537516927586682	0.0112375393416122	0.0584996783664021	0.448728694134667	0.00985395358867966	7	0.448728694134667
274	NEW YORK POST	The New York Post	Newspaper	Sports+Late City Final	NA	May 22, 2009	2009	5	113	They were like a million other petty criminals	1	0	1	1	1	TRUE	major_paper	NYPOST.COM	0.2497	0.146570350976892	0.0794792922895502	0.00387312806755136	0.00355687636706243	0.106793598960882	0.247094620206556	0.411216455353732	0.00141567777777299	7	0.411216455353732
275	NEW YORK POST	The New York Post	Newspaper	All Editions	NA	September 5, 2012	2012	9	81	President Obama had some truly scary news for Am	1	0	1	1	1	TRUE	major_paper	NYPOST.COM	0.2497	0.247195245024743	0.0425679662989873	0.0486466242196282	0.233840788718278	0.00603572317289196	0.0120043697668763	0.348912944898974	0.0607963378996221	7	0.348912944898974
276	NEW YORK POST	The New York Post	NA	All Editions	NA	January 30, 2003	2003	1	181	A Brooklyn landlord and party planner who pleaded	1	0	1	1	1	TRUE	major_paper	NYPOST.COM	0.2497	0.0290489541591969	0.60940870978078	0.101722690938067	0.0207750938201982	0.0928524929218233	0.0734279326418281	0.0612485165636354	0.0115156091744701	2	0.60940870978078
277	NEW YORK POST	The New York Post	NA	All Editions	NA	October 20, 1999	1999	10	238	WHO is poor and how many poor people are there i	1	0	1	1	1	TRUE	major_paper	NYPOST.COM	0.2497	0.0927689166466519	0.0292130271339165	0.175906430348899	0.523507702198659	0.00359603940981769	0.0176103641693805	0.135610962548768	0.0217865575439073	4	0.523507702198659
278	NEW YORK POST	The New York Post	Newspaper	All Editions	NA	June 26, 2015	2015	6	42	Two city workers stole at least $340,000 intende	1	0	1	1	1	TRUE	major_paper	NYPOST.COM	0.2497	0.0068680945666296	0.665644158405604	0.029670044673754	0.0122511169153048	0.156218557059858	0.0663039143189129	0.0594015054502464	0.00364260860968973	2	0.665644158405604
279	NEW YORK POST	The New York Post	Newspaper	All Editions	NA	December 20, 2010	2010	12	108	TAKE a guy who is on the Supreme Court and give	0	0	0	1	1	TRUE	major_paper	NYPOST.COM	0.2497	0.0536316629727015	0.104023577062599	0.00935327052281119	0.03889332078192	0.0744033310998106	0.0968108178210681	0.619106549151327	0.00377747058776246	7	0.619106549151327
280	NEW YORK POST	The New York Post	Newspaper	All Editions	NA	December 9, 2010	2010	12	108	They were hungry - for cash. Three current and	1	0	1	1	1	TRUE	major_paper	NYPOST.COM	0.2497	0.0182163172991492	0.658715128509275	0.0922524347717285	0.0575346060658248	0.0649829530716303	0.0216679662462065	0.0730047038345751	0.0136258902016099	2	0.658715128509275
281	NEW YORK POST	The New York Post	NA	All Editions	NA	May 26, 1999	1999	5	233	Welfare reform in New York City is back on track	1	0	1	1	1	TRUE	major_paper	NYPOST.COM	0.2497	0.145510557215088	0.402684481997033	0.339922184151865	0.0195835831007453	0.0116286121309088	0.00960649768466299	0.0403200964206023	0.0307439872990943	2	0.402684481997033
282	NEW YORK POST	The New York Post	NA	All Editions	NA	July 29, 2000	2000	7	223	A ruling this week by Federal District Court Jud	1	0	1	1	1	TRUE	major_paper	NYPOST.COM	0.2497	0.0398012132128964	0.455059780552786	0.348193565939364	0.0303288950176015	0.00730408344372731	0.0135630378133065	0.0896702564294462	0.0160791675908718	2	0.455059780552786
283	NEW YORK POST	The New York Post	Newspaper	Sports+Late City Final	NA	February 18, 2009	2009	2	110	WASHINGTON - Struggling automakers yesterday wen	1	0	1	1	1	TRUE	major_paper	NYPOST.COM	0.2497	0.0796869331603163	0.165719112070035	0.0134450922936088	0.314926127677263	0.0266196904178575	0.00369005838231568	0.0689833090042731	0.32692967699433	8	0.32692967699433
284	NEW YORK POST	The New York Post	Newspaper	All Editions	NA	February 21, 2009	2009	2	110	The shocks just keep coming for Bernard Madoff's	1	0	1	1	1	TRUE	major_paper	NYPOST.COM	0.2497	0.00766121241693441	0.310984732482115	0.0174290160338711	0.217471479733276	0.0585918421291599	0.121148789733142	0.236487724777234	0.0302252026942672	2	0.310984732482115
285	NEW YORK POST	The New York Post	Newspaper	Late City Final	NA	May 22, 2007	2007	5	137	An Ohio congressman who is trying to live on $3	1	0	1	1	1	TRUE	major_paper	NYPOST.COM	0.2497	0.152973001374928	0.273817869785733	0.0255332351478254	0.0304820767240927	0.0809363306276346	0.0167921070911026	0.238685999399935	0.180779379848749	2	0.273817869785733
286	NEW YORK POST	The New York Post	Newspaper	All Editions	NA	April 2, 2017	2017	4	16	Cindy, a 27-year-old Bushwick graphic designer,	1	0	1	1	1	TRUE	major_paper	NYPOST.COM	0.2497	0.0184874098538129	0.126405717546703	0.00846109886684469	0.0324128961579628	0.036711814237289	0.136248520242188	0.637679673191302	0.00359286990389752	7	0.637679673191302
287	NEW YORK POST	The New York Post	NA	Letters@nypost.com	NA	June 20, 1998	1998	6	246	Jack Newfield says about Sen. Al D'Amato that "H	1	0	1	1	1	TRUE	major_paper	NYPOST.COM	0.2497	0.729939946017698	0.0119579287576397	0.00637826645843401	0.00850374955812459	0.00662526844632355	0.00564722370254471	0.220482368624545	0.0104652484346905	1	0.729939946017698
288	NEW YORK POST	The New York Post	Newspaper	All Editions	NA	June 6, 2007	2007	6	138	Just how retrograde are Gov. Spitzer's social po	1	0	1	1	1	TRUE	major_paper	NYPOST.COM	0.2497	0.0184116428013535	0.236334651526819	0.38872273490539	0.0438529317646971	0.00850424798672156	0.036150487714177	0.258886270470659	0.00913703283018266	3	0.38872273490539
289	NEW YORK POST	The New York Post	Newspaper	Sports+Late City Final	NA	October 19, 2006	2006	10	154	The city unveiled a new Web site yesterday that w	1	0	1	1	1	TRUE	major_paper	NYPOST.COM	0.2497	0.0121615674844061	0.660028524476161	0.189388740242813	0.0223480194523882	0.0244421108507758	0.024943593865773	0.0513092615536279	0.0153781820740548	2	0.660028524476161
290	NEW YORK POST	The New York Post	Newspaper	Sports+Late City Final	NA	June 16, 2009	2009	6	114	Throw the book at him - and then some. More th	1	0	1	1	1	TRUE	major_paper	NYPOST.COM	0.2497	0.0101244122017897	0.0671136962162984	0.0125180914081251	0.11103212322481	0.10127915394156	0.226535572099298	0.456452132467963	0.0149448184401565	7	0.456452132467963
291	NEW YORK POST	The New York Post	Newspaper	All Editions	NA	February 19, 2015	2015	2	38	Chef Tom Colicchio has a new TV job - on cable n	1	0	1	1	1	TRUE	major_paper	NYPOST.COM	0.2497	0.0475029189133367	0.220837714961106	0.0133875620770355	0.0246146182875935	0.0534732222625137	0.0732282273054074	0.560272635590491	0.00668310060251669	7	0.560272635590491
292	NEW YORK POST	The New York Post	Newspaper	All Editions	NA	January 20, 2008	2008	1	121	Gov. Spitzer's race back in time is on: Aides Tu	1	0	1	1	1	TRUE	major_paper	NYPOST.COM	0.2497	0.0725195780009829	0.274555263071599	0.264850011131267	0.0763919399998517	0.00762302742386501	0.0183161922147301	0.234420704654991	0.0513232835027129	2	0.274555263071599
293	NEW YORK POST	The New York Post	NA	All Editions	NA	September 24, 2000	2000	9	225	Activists with a suspect case and a judge with a	1	0	1	1	1	TRUE	major_paper	NYPOST.COM	0.2497	0.117784275697559	0.4662493131875	0.165626757997544	0.0222468036937544	0.0182313399920075	0.058995371927117	0.105092392242891	0.0457737452616267	2	0.4662493131875
294	NEW YORK POST	The New York Post	Newspaper	All Editions	NA	June 5, 2015	2015	6	42	Manhattan writer Suzanne Corso, 46, was once a	1	0	1	1	1	TRUE	major_paper	NYPOST.COM	0.2497	0.00637536917906615	0.0357680038880481	0.0064852869924563	0.0289728207301641	0.0445416716591741	0.251878641327915	0.61496364563985	0.0110145605833267	7	0.61496364563985
295	NEW YORK POST	The New York Post	Newspaper	All Editions	NA	February 11, 2009	2009	2	110	It's official: The "millionaire's tax" is now an	1	0	1	1	1	TRUE	major_paper	NYPOST.COM	0.2497	0.114996203167725	0.0893804919510797	0.0325472436680003	0.236204841287809	0.0108576061111395	0.0205892665516199	0.245276050305361	0.250148296957266	8	0.250148296957266
296	NEW YORK POST	The New York Post	Newspaper	Sports+Late City Final	NA	October 23, 2015	2015	10	46	In Martin Scorsese's Mafia epic "Goodfellas," wi	1	0	1	1	1	TRUE	major_paper	NYPOST.COM	0.2497	0.0244797531260545	0.171774109526122	0.00566592234195687	0.0321605392139062	0.175347237357008	0.0351733421293401	0.550822313935697	0.00457678236991544	7	0.550822313935697
297	NEW YORK POST	The New York Post	Newspaper	All Editions	NA	July 10, 2011	2011	7	91	DENNIS Walcott might want to introduce his left	1	0	1	1	1	TRUE	major_paper	NYPOST.COM	0.2497	0.12435244459681	0.261214085315302	0.0135922313076135	0.132007708572947	0.0981530730906064	0.023226589469273	0.303245448295742	0.0442084193517063	7	0.303245448295742
298	NEW YORK POST	The New York Post	Newspaper	All Editions	NA	November 14, 2010	2010	11	107	THE TOAST OF TENNESSEE - METS' DICKEY GETS AWARD	0	0	0	1	1	TRUE	major_paper	NYPOST.COM	0.2497	0.0711349493647355	0.166373029574462	0.00809291426237835	0.00701975884013332	0.196329572521535	0.0703447600120817	0.477043341773406	0.00366167365126772	7	0.477043341773406
299	NEW YORK POST	The New York Post	Newspaper	Sports+Late City Final	NA	July 23, 2015	2015	7	43	A panel appointed by Gov. Cuomo voted on Wednesd	1	0	1	1	1	TRUE	major_paper	NYPOST.COM	0.2497	0.0714689675195397	0.349675947970472	0.101674213123581	0.36187785340659	0.015179986959112	0.00601929839771547	0.0351308532026499	0.0589728794203391	4	0.36187785340659
300	NEW YORK POST	The New York Post	Newspaper	All Editions	NA	June 6, 2011	2011	6	90	No one showed up for a class reunion at upstate	1	0	1	1	1	TRUE	major_paper	NYPOST.COM	0.2497	0.021117079933327	0.17914667312313	0.0750582721715047	0.0201437251010284	0.368524588075898	0.0245889240159867	0.285249612536746	0.0261711250423795	5	0.368524588075898
301	NEW YORK POST	The New York Post	NA	Entertainment	NA	March 8, 1998	1998	3	243	COURTSHIP: My niece cried, "He is the man for me	1	0	1	1	1	TRUE	major_paper	NYPOST.COM	0.2497	0.0163438354321768	0.0461214673377151	0.0212767977150974	0.00752612637842254	0.0268050913344122	0.152136298308381	0.727806236670867	0.00198414682292784	7	0.727806236670867
302	NEW YORK POST	The New York Post	NA	Entertainment	NA	July 9, 1998	1998	7	247	FOR great laughs, my jokes are known - but today	1	0	1	1	1	TRUE	major_paper	NYPOST.COM	0.2497	0.0334880316781599	0.0342198688082601	0.00614271163309597	0.00819560855448959	0.0744914605823045	0.0780176955384372	0.762902895869722	0.00254172733553018	7	0.762902895869722
303	NEW YORK POST	The New York Post	Newspaper	All Editions	NA	January 15, 2014	2014	1	49	Now that the White House is accusing some Senate	1	0	1	1	1	TRUE	major_paper	NYPOST.COM	0.2497	0.468920611715425	0.0099383499889549	0.0135257297562657	0.0231556247471157	0.00309778769225548	0.00372012614162733	0.233701421894443	0.243940348063913	1	0.468920611715425
304	NEW YORK POST	The New York Post	Newspaper	Sports+Late City Final	NA	May 5, 2016	2016	5	29	This "tax" is in the bag. The City Council on T	1	0	1	1	1	TRUE	major_paper	NYPOST.COM	0.2497	0.0538267052615851	0.325960756129888	0.0152589934098885	0.0300778437244739	0.0284369212215883	0.00725557490992947	0.161184862945481	0.377998342397166	8	0.377998342397166
305	NEW YORK POST	The New York Post	NA	All Editions	NA	October 27, 1999	1999	10	238	A YOUNG, very pregnant Tina Guinty can't go home	1	0	1	1	1	TRUE	major_paper	NYPOST.COM	0.2497	0.00614686951978646	0.0748857357446635	0.102503867891521	0.00793298342477102	0.0095079963903735	0.420776906768209	0.376248407348827	0.0019972329118475	6	0.420776906768209
306	NEW YORK POST	The New York Post	Newspaper	All Editions	NA	February 26, 2009	2009	2	110	IF you haven't already OD'd on Octomom Nadya Sul	1	0	1	1	1	TRUE	major_paper	NYPOST.COM	0.2497	0.0713989307344496	0.0217152311952716	0.00509052975204823	0.0257760601227481	0.0441859461243947	0.177095903958173	0.652222790652882	0.00251460746003263	7	0.652222790652882
307	NEW YORK POST	The New York Post	NA	All Editions	NA	August 28, 2000	2000	8	224	THE most time-honored political lesson still sur	1	0	1	1	1	TRUE	major_paper	NYPOST.COM	0.2497	0.507943047252175	0.0739642649759691	0.0257021589990033	0.11312897255352	0.0377670898845446	0.00653847441147331	0.149491418585328	0.085464573337987	1	0.507943047252175
308	NEW YORK POST	The New York Post	NA	All Editions	NA	May 12, 2000	2000	5	221	MOST lawyers spend their days huddled with drear	1	0	1	1	1	TRUE	major_paper	NYPOST.COM	0.2497	0.0878846314887388	0.0982456488785684	0.015851558713228	0.00954900270241713	0.10246954025024	0.161880409874744	0.50887780144917	0.0152414066428938	7	0.50887780144917
309	NEW YORK POST	The New York Post	Newspaper	All Editions	NA	May 28, 2009	2009	5	113	Under pressure from city and state lawmakers, Co	1	0	1	1	1	TRUE	major_paper	NYPOST.COM	0.2497	0.00985662576622263	0.702921588897188	0.0368248476214247	0.0201982281883908	0.107116894479711	0.0736626212892815	0.0418708255373858	0.00754836822039514	2	0.702921588897188
310	NEW YORK POST	The New York Post	Newspaper	Late City Final	NA	February 11, 2009	2009	2	110	The shameless California fertility doc who did a	1	0	1	1	1	TRUE	major_paper	NYPOST.COM	0.2497	0.0237720909073954	0.195063157131509	0.100401137553471	0.0874048665701756	0.0512861038264887	0.28349520860194	0.251859410362015	0.00671802504700638	6	0.28349520860194
311	NEW YORK POST	The New York Post	NA	All Editions	NA	February 20, 2001	2001	2	206	It sure was decent of the poverty crowd to let t	1	0	1	1	1	TRUE	major_paper	NYPOST.COM	0.2497	0.0335032529632314	0.308383540240191	0.326762411970348	0.0436867435233822	0.00945932328504796	0.0214115027382125	0.239611988475035	0.0171812368045515	3	0.326762411970348
312	NEW YORK POST	The New York Post	Newspaper	All Editions	NA	June 11, 2013	2013	6	66	The Issue: Gov. Cuomo's proposed Women's Equalit	1	0	1	1	1	TRUE	major_paper	NYPOST.COM	0.2497	0.384181752679804	0.0429445231102422	0.234194563025334	0.027636808271722	0.0112348171878872	0.124892790149187	0.121883992514785	0.0530307530610379	1	0.384181752679804
313	NEW YORK POST	The New York Post	NA	All Editions	NA	May 13, 1999	1999	5	233	We're not quite certain how Dr. Martin Luther Ki	1	0	1	1	1	TRUE	major_paper	NYPOST.COM	0.2497	0.492559187448381	0.208585316315195	0.0160415654669843	0.0332682089098477	0.0203626582323284	0.0124844473449685	0.204520666331858	0.0121779499504364	1	0.492559187448381
314	NEW YORK POST	The New York Post	Newspaper	Sports+Late City Final	NA	April 30, 2010	2010	4	100	IT REALLY sucks to be a banker. The throng desc	1	0	1	1	1	TRUE	major_paper	NYPOST.COM	0.2497	0.0902972851910255	0.0740369275332724	0.0227892223465392	0.160485746575105	0.0142279602528293	0.0740844574205936	0.552013602364318	0.0120647983163161	7	0.552013602364318
315	NEW YORK POST	The New York Post	NA	Metro	NA	December 10, 2003	2003	12	192	Carlos Ramirez was pushed off the George Washing	1	0	1	1	1	TRUE	major_paper	NYPOST.COM	0.2497	0.007867595652796	0.200307712412938	0.197928950430104	0.0114459591246551	0.0988283464922262	0.296880304281884	0.18347697125543	0.00326416034996696	6	0.296880304281884
316	NEW YORK POST	The New York Post	Newspaper	All Editions	NA	April 19, 2015	2015	4	40	This week, Gwyneth Paltrow attempted to survive	1	0	1	1	1	TRUE	major_paper	NYPOST.COM	0.2497	0.00534794963482585	0.0287634967846012	0.00169590897248754	0.004158628817895	0.0901265404453607	0.15354170374412	0.716022537083798	0.00034323451691183	7	0.716022537083798
317	NEW YORK POST	The New York Post	NA	All Editions	NA	October 18, 2000	2000	10	226	WHEN Moby set off on his tour for "Play" 19 mont	1	0	1	1	1	TRUE	major_paper	NYPOST.COM	0.2497	0.0175347708424324	0.038543040389409	0.0156416016391898	0.03360879942082	0.0482624007114734	0.115580511076489	0.72830416614633	0.0025247097738576	7	0.72830416614633
318	NEW YORK POST	The New York Post	Newspaper	All Editions	NA	November 5, 2017	2017	11	23	An overzealous sheepdog-in-training led a flock	1	0	1	1	1	TRUE	major_paper	NYPOST.COM	0.2497	0.0181922581222864	0.161628608952697	0.0630595823935241	0.0499225544739433	0.0963947776283567	0.14375324520375	0.451209912221783	0.0158390610036597	7	0.451209912221783
319	NEW YORK POST	The New York Post	Newspaper	All Editions	NA	January 22, 2012	2012	1	73	It was in 1850 that a French economist, Fr√©d√©	1	0	1	1	1	TRUE	major_paper	NYPOST.COM	0.2497	0.104197428936854	0.0712715707315669	0.131516748048235	0.233813616498234	0.0672444563739227	0.024098897350211	0.285045807992341	0.0828114740686361	7	0.285045807992341
320	NEW YORK POST	The New York Post	Newspaper	All Editions	NA	April 17, 2015	2015	4	40	Six days after vowing to subsist on $29 worth of	1	0	1	1	1	TRUE	major_paper	NYPOST.COM	0.2497	0.0370869273333053	0.0653600761158379	0.0482969026648621	0.0352888469742084	0.0209043048547284	0.15380441702269	0.624860461259585	0.0143980637747827	7	0.624860461259585
321	NEW YORK POST	The New York Post	NA		NA	May 31, 2000	2000	5	221	"Clerks" Tonight at 9:30 on WABC/Ch. 7 FINALLY	1	0	1	1	1	TRUE	major_paper	NYPOST.COM	0.2497	0.0100196847155937	0.0595886230203297	0.00564839165394313	0.00772629969706043	0.110969664030965	0.0190247413531967	0.785092220092318	0.00193037543659362	7	0.785092220092318
322	NEW YORK POST	The New York Post	Newspaper	All Editions	NA	September 30, 2015	2015	9	45	'He's just living his life like he can leave a t	1	0	1	1	1	TRUE	major_paper	NYPOST.COM	0.2497	0.0724630114909121	0.192511464338816	0.0397507589019775	0.0338976892961556	0.0243792852067728	0.289410773443468	0.331706213630124	0.015880803691774	7	0.331706213630124
323	NEW YORK POST	The New York Post	Newspaper	All Editions	NA	August 26, 2005	2005	8	164	Good news: The number of New Yorkers who get foo	1	0	1	1	1	TRUE	major_paper	NYPOST.COM	0.2497	0.0130599679833571	0.243094423997393	0.23866648317561	0.0779431930736129	0.0105821638388723	0.0241209376211609	0.347975315498413	0.0445575148115818	7	0.347975315498413
324	NEW YORK POST	The New York Post	Newspaper	All Editions	NA	June 29, 2012	2012	6	78	The Issue: The City Council's call to fingerprin	1	0	1	1	1	TRUE	major_paper	NYPOST.COM	0.2497	0.0494893802640258	0.344253156172456	0.180677587079037	0.0218249353178706	0.0175564105328237	0.034468533110747	0.336372915290063	0.0153570822329769	2	0.344253156172456
325	NEW YORK POST	The New York Post	NA	All Editions	NA	May 10, 2000	2000	5	221	ALBANY - The Pataki administration wants nearly	1	0	1	1	1	TRUE	major_paper	NYPOST.COM	0.2497	0.0079199385243751	0.286047163406667	0.591371366938156	0.0171726511501984	0.00497798211563905	0.0129931849931852	0.0357263969638503	0.0437913159079291	3	0.591371366938156
326	NEW YORK POST	The New York Post	Newspaper	All Editions	NA	March 14, 2010	2010	3	99	Killing Willis From Diff'rent Strokes to the M	1	0	1	1	1	TRUE	major_paper	NYPOST.COM	0.2497	0.0105565244548025	0.0100506859608918	0.000885721754155917	0.00238289776397167	0.160178449024908	0.108222288452527	0.707410057375951	0.000313375212791229	7	0.707410057375951
327	NEW YORK POST	The New York Post	Newspaper	All Editions	NA	December 1, 2005	2005	12	168	The yellow brick road ended in guilty pleas yest	1	0	1	1	1	TRUE	major_paper	NYPOST.COM	0.2497	0.00827530284522948	0.106548839043271	0.0133569701703093	0.00562344624152934	0.307606085328316	0.209383385662117	0.347971047630608	0.00123492307861935	7	0.347971047630608
328	NEW YORK POST	The New York Post	Newspaper	Sports+Late City Final	NA	January 29, 2009	2009	1	109	WASHINGTON - The House approved President Obama'	1	0	1	1	1	TRUE	major_paper	NYPOST.COM	0.2497	0.122293266851405	0.100640665025976	0.0304373705431275	0.0437738080758145	0.0122060226219508	0.00937309886230099	0.0413850118216279	0.639890756197797	8	0.639890756197797
329	NEW YORK POST	The New York Post	Newspaper	All Editions	NA	December 30, 2012	2012	12	84	Most people run to the corner bodega for a gallo	1	0	1	1	1	TRUE	major_paper	NYPOST.COM	0.2497	0.0057914798278228	0.473651157931291	0.111461353963183	0.0720885500169639	0.104311848456299	0.0628900382465626	0.161399562846416	0.00840600871146194	2	0.473651157931291
330	NEW YORK POST	The New York Post	Newspaper	Sports+Late City Final	NA	November 11, 2015	2015	11	47	WASHINGTON - Chris Christie made the best of a b	1	0	1	1	1	TRUE	major_paper	NYPOST.COM	0.2497	0.635285716581641	0.0180061011905292	0.0169143313839452	0.0672109196871985	0.016099447656354	0.00921250146343032	0.213198604657884	0.0240723773790183	1	0.635285716581641
331	NEW YORK POST	The New York Post	Newspaper	Sports+Late City Final	NA	September 28, 2005	2005	9	165	A heartless midget-mocker who insulted her short	1	0	1	1	1	TRUE	major_paper	NYPOST.COM	0.2497	0.0121849560726626	0.280418190252122	0.0309896067464142	0.010955521675251	0.220646996766412	0.146747031545485	0.295142990499077	0.00291470644257666	7	0.295142990499077
332	NEW YORK POST	The New York Post	Newspaper	All Editions	NA	May 22, 2006	2006	5	149	One thing upon which just about every one can ag	1	0	1	1	1	TRUE	major_paper	NYPOST.COM	0.2497	0.0306911231936535	0.281503566948671	0.0158960359862035	0.241364472250708	0.104779205098396	0.0157802928267434	0.255485915642817	0.0544993880528066	2	0.281503566948671
333	NEW YORK POST	The New York Post	Newspaper	All Editions	NA	April 20, 2015	2015	4	40	Gwyneth Paltrow flamed out on playing poor. The	1	1	1	1	1	TRUE	major_paper	NYPOST.COM	0.2497	0.0260638058169705	0.186142577037502	0.280000500888165	0.0332197044954528	0.0158152749095339	0.0674405531432669	0.378008728907501	0.0133088548016091	7	0.378008728907501
334	NEW YORK POST	The New York Post	Newspaper	All Editions	NA	February 9, 2014	2014	2	50	Among its many stamps, the Postal Service has a	1	0	1	1	1	TRUE	major_paper	NYPOST.COM	0.2497	0.265803579191829	0.0269058678397958	0.0939029081954111	0.228924839779464	0.0167543965592674	0.0126692165446097	0.267666510777228	0.0873726811123947	7	0.267666510777228
335	NEW YORK POST	The New York Post	Newspaper	All Editions	NA	November 5, 2012	2012	11	83	Americans tomorrow make a fateful choice: Will t	1	0	1	1	1	TRUE	major_paper	NYPOST.COM	0.2497	0.44438268954029	0.0122451276513873	0.0137560516759067	0.262946968240663	0.00242694998925793	0.00296966753384484	0.182434611966081	0.0788379334025693	1	0.44438268954029
336	NEW YORK POST	The New York Post	Newspaper	All Editions	NA	May 4, 2014	2014	5	53	Dear John: A person does not have to be a rocket	1	0	1	1	1	TRUE	major_paper	NYPOST.COM	0.2497	0.0328394450192746	0.070976019515483	0.0189601248065428	0.237982145760158	0.0537479199322009	0.0333942632696654	0.546612103610497	0.00548797808617818	7	0.546612103610497
337	NEW YORK POST	The New York Post	Newspaper	All Editions	NA	February 8, 2014	2014	2	50	The Issue: Whether government-subsidized benefit	1	0	1	1	1	TRUE	major_paper	NYPOST.COM	0.2497	0.238498315602836	0.025501245927733	0.25184850983637	0.312762173782636	0.00285212636270593	0.00827920405267081	0.09899659995822	0.0612618244768278	4	0.312762173782636
338	NEW YORK POST	The New York Post	Newspaper	All Editions	NA	May 9, 2016	2016	5	29	RIP, plastic shopping bags. Sayonara, paper ones	1	0	1	1	1	TRUE	major_paper	NYPOST.COM	0.2497	0.0285415002629762	0.243921450273552	0.0246433034627992	0.09508180836402	0.100486489651259	0.0388066999377824	0.433991001439734	0.0345277466078774	7	0.433991001439734
339	NEW YORK POST	The New York Post	Newspaper	All Editions	NA	February 11, 2014	2014	2	50	Following through on a campaign pledge, Mayor de	1	0	1	1	1	TRUE	major_paper	NYPOST.COM	0.2497	0.0576134705639471	0.582632823378077	0.0825827941220056	0.0423171914072738	0.0283293271306595	0.037649312543458	0.108416767946973	0.0604583129076068	2	0.582632823378077
340	NEW YORK POST	The New York Post	Newspaper	Late City Final	NA	November 7, 2012	2012	11	83	His first four years were mostly a bust, he offe	1	0	1	1	1	TRUE	major_paper	NYPOST.COM	0.2497	0.546205961780426	0.0063013123556706	0.0116891356483424	0.154229878061755	0.00182586455823783	0.00354697773863409	0.242432065262215	0.0337688045947197	1	0.546205961780426
341	NEW YORK POST	The New York Post	NA	All Editions	NA	May 1, 2001	2001	5	209	Sunday's New York Times carried a Page One accou	1	0	1	1	1	TRUE	major_paper	NYPOST.COM	0.2497	0.174545924998662	0.0618540864196571	0.133248856743996	0.0862047538815258	0.0395616379017634	0.12970217012736	0.361148194192617	0.0137343757344198	7	0.361148194192617
342	NEW YORK POST	The New York Post	NA	PostOpinion	NA	July 24, 1998	1998	7	247	IT'S tough for conservatives to make a buck thes	1	0	1	1	1	TRUE	major_paper	NYPOST.COM	0.2497	0.208710753669996	0.0204841804570662	0.349258829725794	0.260945084421407	0.0219473385825681	0.0151960841396291	0.108535569069533	0.0149221599340067	3	0.349258829725794
343	NEW YORK POST	The New York Post	Newspaper	All Editions	NA	November 8, 2017	2017	11	23	IN a moving new interview, celebrity chef Sandra	1	0	1	1	1	TRUE	major_paper	NYPOST.COM	0.2497	0.0235211515969374	0.0207989997911267	0.103400851771102	0.013922143711141	0.00890514297266642	0.41064064040914	0.416462824622265	0.00234824512562088	7	0.416462824622265
344	NEW YORK POST	The New York Post	Newspaper	All Editions	NA	February 3, 2017	2017	2	14	Mayor de Blasio managed a truce with the Patrolm	1	0	1	1	1	TRUE	major_paper	NYPOST.COM	0.2497	0.0350104082633338	0.214644452975158	0.0151889127033284	0.333583458462153	0.0382432609548973	0.0104779269565391	0.284747465973806	0.068104113710785	4	0.333583458462153
345	NEW YORK POST	The New York Post	Newspaper	Sports+Late City Final	NA	April 18, 2006	2006	4	148	In an unusual public reversal, the Bloomberg adm	1	0	1	1	1	TRUE	major_paper	NYPOST.COM	0.2497	0.0306176162630396	0.534481059111089	0.292694039409268	0.0220788162118446	0.0173780074686786	0.0168684865706304	0.0574539830208502	0.028427991944599	2	0.534481059111089
346	NEW YORK POST	The New York Post	Newspaper	All Editions	NA	May 21, 2012	2012	5	77	In other news from Camp Cuomo, the governor last	1	0	1	1	1	TRUE	major_paper	NYPOST.COM	0.2497	0.114631749854459	0.312301707747819	0.289019703910137	0.0584534632710703	0.0120615996071444	0.0126545576585727	0.151338530003958	0.0495386879468391	2	0.312301707747819
347	NEW YORK POST	The New York Post	Newspaper	All Editions	NA	February 17, 2006	2006	2	146	A negotiator for the Patrolmen's Benevolent Asso	1	0	1	1	1	TRUE	major_paper	NYPOST.COM	0.2497	0.0798648121680852	0.540148689664895	0.027176505693589	0.044882360908538	0.0396046654961711	0.00946072691977073	0.128224165224358	0.130638073924593	2	0.540148689664895
348	NEW YORK POST	The New York Post	Newspaper	Sports+Late City Final	NA	June 10, 2015	2015	6	42	A city welfare-agency worker handed out thousands	1	0	1	1	1	TRUE	major_paper	NYPOST.COM	0.2497	0.0114172871590614	0.625428903103141	0.224215030884108	0.0230881952334798	0.0445742207079685	0.0238921732530477	0.0337154359285597	0.0136687537306344	2	0.625428903103141
349	NEW YORK POST	The New York Post	Newspaper	All Editions	NA	June 19, 2016	2016	6	30	Dear John: This is in answer to your column in T	1	0	1	1	1	TRUE	major_paper	NYPOST.COM	0.2497	0.310646094762735	0.0227352347779552	0.00609998607666444	0.199929762469221	0.00853519192861885	0.0161487945678201	0.416452452723857	0.0194524826931281	7	0.416452452723857
350	NEW YORK POST	The New York Post	Newspaper	All Editions	NA	October 28, 2012	2012	10	82	Each time I mention that I voted for Barack Obam	1	0	1	1	1	TRUE	major_paper	NYPOST.COM	0.2497	0.653210704390542	0.00573871641989536	0.00364974118730592	0.094976355226418	0.00266814093990401	0.00248311301378623	0.223715234268351	0.013557994553798	1	0.653210704390542
351	NEW YORK POST	The New York Post	Newspaper	All Editions	NA	June 14, 2012	2012	6	78	No more sinning on the taxpayers' dime! Legisla	1	0	1	1	1	TRUE	major_paper	NYPOST.COM	0.2497	0.0137821306045338	0.217409337915829	0.426939363968823	0.0219146492768641	0.111060324639639	0.025081177449407	0.043392980285129	0.140420035859775	3	0.426939363968823
352	NEW YORK POST	The New York Post	Newspaper	All Editions	NA	October 28, 2010	2010	10	106	MOMS last week were scraping jaws off the sofa	0	0	0	1	1	TRUE	major_paper	NYPOST.COM	0.2497	0.0833330330761191	0.0990293019805853	0.0170265276957087	0.0145683225299196	0.16400919660275	0.139214266072744	0.480301446564514	0.00251790547765938	7	0.480301446564514
353	NEW YORK POST	The New York Post	Newspaper	All Editions	NA	June 7, 2012	2012	6	78	The Issue: The Obama administration's tendency t	1	0	1	1	1	TRUE	major_paper	NYPOST.COM	0.2497	0.588058930564479	0.0410811094367763	0.0104709961684397	0.100064173596251	0.00960553127433613	0.00721736800117576	0.195611760139862	0.0478901308186802	1	0.588058930564479
354	NEW YORK POST	The New York Post	Newspaper	Sports+Late City Final	NA	October 17, 2012	2012	10	82	It's the future, stupid. If the test of last ni	1	0	1	1	1	TRUE	major_paper	NYPOST.COM	0.2497	0.38070279070497	0.00890977838357731	0.00470166096643154	0.105638560765817	0.00273916252952326	0.0032801306533432	0.464671660183155	0.0293562558131833	7	0.464671660183155
355	NEW YORK POST	The New York Post	Newspaper	Metro	NA	October 11, 2015	2015	10	46	More than 94 million adult Americans are no long	1	0	1	1	1	TRUE	major_paper	NYPOST.COM	0.2497	0.00575639583935847	0.0880732732700973	0.0796783467255541	0.353024465570896	0.00730661645091935	0.142235171882113	0.321331838786424	0.00259389147463827	4	0.353024465570896
356	NEW YORK POST	The New York Post	NA	All Editions	NA	February 27, 2003	2003	2	182	LET'S hear it for the B-list. Even while the ha	1	0	1	1	1	TRUE	major_paper	NYPOST.COM	0.2497	0.0564094287972028	0.0631208667351423	0.00701529614391218	0.00780671645868301	0.0332242398377313	0.119887126856789	0.710223349514268	0.0023129756562713	7	0.710223349514268
357	NEW YORK POST	The New York Post	Newspaper	All Editions	NA	May 20, 2012	2012	5	77	It is a clich√© to say America is polarized, but	1	0	1	1	1	TRUE	major_paper	NYPOST.COM	0.2497	0.131575234448542	0.164301254055917	0.205766734948992	0.194396410764293	0.00734822410050898	0.0126812025885392	0.25690325447263	0.0270276846205774	7	0.25690325447263
358	NEW YORK POST	The New York Post	Newspaper	All Editions	NA	August 31, 2006	2006	8	152	Here we go again: The Census Bureau is out with	1	0	1	1	1	TRUE	major_paper	NYPOST.COM	0.2497	0.0309753073250921	0.130504103572309	0.0690247818143075	0.474222394350664	0.00655059869072094	0.0524347044951357	0.22516817848663	0.011119931265141	4	0.474222394350664
359	NEW YORK POST	The New York Post	Newspaper	Sports+Late City Final	NA	January 19, 2015	2015	1	37	Call them anti-social workers. Nearly 140 emplo	1	0	1	1	1	TRUE	major_paper	NYPOST.COM	0.2497	0.00587440677157726	0.667949551638569	0.0753197027677151	0.0741445043101023	0.0585936420072391	0.0553115585693956	0.0584513304786816	0.00435530345671994	2	0.667949551638569
360	NEW YORK POST	The New York Post	Newspaper		NA	June 19, 2005	2005	6	162	BASKETBALL and fatherhood can go together in a	1	0	1	1	1	TRUE	major_paper	NYPOST.COM	0.2497	0.0856343678826995	0.0253073710182751	0.0291333577557275	0.012294735371045	0.034598808939791	0.198801241451256	0.612193456377571	0.00203666120363447	7	0.612193456377571
361	NEW YORK POST	The New York Post	Newspaper	All Editions	NA	April 22, 2006	2006	4	148	A high-ranking city Human Resources Administrati	1	0	1	1	1	TRUE	major_paper	NYPOST.COM	0.2497	0.0718817270906415	0.695009787326848	0.0327126746219777	0.017908237955374	0.0441797496247992	0.0151925773679035	0.109717099862302	0.0133981461501541	2	0.695009787326848
362	NEW YORK POST	The New York Post	Newspaper	All Editions	NA	April 24, 2006	2006	4	148	He is one of the city's top slumlord-busting law	1	0	1	1	1	TRUE	major_paper	NYPOST.COM	0.2497	0.00290793860268398	0.334808265688374	0.0110080500413595	0.0136523948329971	0.0331598336510543	0.402566900769498	0.200997353604533	0.000899262809500437	6	0.402566900769498
363	NEW YORK POST	The New York Post	Newspaper	All Editions	NA	May 25, 2014	2014	5	53	The wife of an ex-MTA bus driver was busted Frid	1	0	1	1	1	TRUE	major_paper	NYPOST.COM	0.2497	0.00837551720456876	0.222455456436815	0.325405120818143	0.0210603765832364	0.191660194525114	0.179663454248961	0.0459406503024813	0.00543922988068087	3	0.325405120818143
364	NEW YORK POST	The New York Post	Newspaper	All Editions	NA	February 21, 2014	2014	2	50	The nation's newest billionaire is a rags-to-ric	1	0	1	1	1	TRUE	major_paper	NYPOST.COM	0.2497	0.0646206916256216	0.207582634737637	0.0178265935263862	0.114154762300119	0.0920968467590255	0.115763846793319	0.356622334696587	0.0313322895613054	7	0.356622334696587
365	NEW YORK POST	The New York Post	Newspaper	All Editions	NA	January 13, 2013	2013	1	61	It's my favorite single-question pop quiz: What	1	0	1	1	1	TRUE	major_paper	NYPOST.COM	0.2497	0.217958069754351	0.111390701132816	0.244513374239698	0.112201765199119	0.00487147759376094	0.0500301023119045	0.250743343622373	0.00829116614597651	7	0.250743343622373
366	NEW YORK POST	The New York Post	Newspaper	All Editions	NA	August 12, 2009	2009	8	116	Pandemonium plagued the launch of a state cashgi	1	0	1	1	1	TRUE	major_paper	NYPOST.COM	0.2497	0.0213353063411194	0.426654459536451	0.325352543750738	0.0226381200258278	0.0230382269844889	0.0799470902457014	0.0900428389370435	0.0109914141786308	2	0.426654459536451
367	NEW YORK POST	The New York Post	Newspaper	All Editions	NA	September 15, 2006	2006	9	153	Ninety-three percent of city streets were clean	1	0	1	1	1	TRUE	major_paper	NYPOST.COM	0.2497	0.0170144475571068	0.331411065535388	0.0386165888142316	0.219120227653957	0.0404994355108281	0.062346513911927	0.284200832983721	0.00679088803284098	2	0.331411065535388
368	NEW YORK POST	The New York Post	Newspaper	All Editions	NA	October 20, 2014	2014	10	58	'Their calculated scheme cost many people . . .	1	0	1	1	1	TRUE	major_paper	NYPOST.COM	0.2497	0.00865373828481572	0.501997118244074	0.123713871636032	0.0475902828706146	0.10503717405246	0.0924512170687	0.107375773972504	0.0131808238707993	2	0.501997118244074
369	NEW YORK POST	The New York Post	Newspaper	All Editions	NA	July 2, 2007	2007	7	139	You'd think Albany would keep its paws off one o	1	0	1	1	1	TRUE	major_paper	NYPOST.COM	0.2497	0.0535130219688138	0.0803726237149563	0.368121444254908	0.186526308292007	0.00455852025211089	0.0105540163922711	0.218532605500821	0.0778214596241113	3	0.368121444254908
370	NEW YORK POST	The New York Post	Newspaper	Sports+Late City Final	NA	September 22, 2007	2007	9	141	FOR a guy who owes $33 million, O.J. Simpson ain	1	0	1	1	1	TRUE	major_paper	NYPOST.COM	0.2497	0.0247387935125931	0.0948559292900347	0.00638055261784387	0.0116565668025561	0.187807402460702	0.114492681276783	0.55751222987144	0.00255584416804584	7	0.55751222987144
371	NEW YORK POST	The New York Post	NA	All Editions	NA	September 24, 1999	1999	9	237	Republican 2000 front-runner George W. Bush yest	1	0	1	1	1	TRUE	major_paper	NYPOST.COM	0.2497	0.570754507459504	0.0422018764753963	0.0190557452179745	0.0736987567347963	0.0199228061771737	0.00617724007642663	0.060881202483868	0.20730786537486	1	0.570754507459504
372	NEW YORK POST	The New York Post	Newspaper	All Editions	NA	November 22, 2012	2012	11	83	Newark Mayor Cory Booker took a break from his H	1	0	1	1	1	TRUE	major_paper	NYPOST.COM	0.2497	0.012049013403959	0.222630055927648	0.0143550595153782	0.0134487338378085	0.222577758944216	0.196458634690857	0.316066773682022	0.00241396999811186	7	0.316066773682022
373	NEW YORK POST	The New York Post	Newspaper	All Editions	NA	October 13, 2010	2010	10	106	THE fun is definitely over. With Carl Paladino	1	0	1	1	1	TRUE	major_paper	NYPOST.COM	0.2497	0.45956401109326	0.0979855091533275	0.0240014397003553	0.0679574612339385	0.00775481168182184	0.00710282697828237	0.259009567071606	0.076624373087409	1	0.45956401109326
374	NEW YORK POST	The New York Post	Newspaper	All Editions	NA	October 24, 2015	2015	10	46	A civil war has erupted among progressive leader	1	0	1	1	1	TRUE	major_paper	NYPOST.COM	0.2497	0.103956571723683	0.296431859223308	0.0553980567499852	0.0997007692452467	0.0387031281043901	0.0338439330089247	0.139309056770014	0.232656625174448	2	0.296431859223308
375	NEW YORK POST	The New York Post	Newspaper	All Editions	NA	November 4, 2012	2012	11	83	First Arden Todd lost the auto-repair shop in hi	1	0	1	1	1	TRUE	major_paper	NYPOST.COM	0.2497	0.598602940620411	0.0223848091150494	0.0113569031215414	0.0919370264968175	0.0226330063631437	0.0257560824818646	0.220801947642101	0.00652728415907163	1	0.598602940620411
376	NEW YORK POST	The New York Post	NA		NA	February 1, 2000	2000	2	218	ATLANTA -- He showed up on Super Monday wearing	1	0	1	1	1	TRUE	major_paper	NYPOST.COM	0.2497	0.0132243404527104	0.032914446802155	0.00304595569514904	0.00386991899177551	0.0242423995779486	0.0517567249374693	0.869478087008389	0.0014681265344031	7	0.869478087008389
377	NEW YORK POST	The New York Post	Newspaper	All Editions	NA	June 30, 2009	2009	6	114	He squandered their fortunes and ruined their li	1	0	1	1	1	TRUE	major_paper	NYPOST.COM	0.2497	0.013485879835634	0.145273622631797	0.0144852878062682	0.0398474054024464	0.160586843183428	0.287860484587583	0.33615851653695	0.00230196001589396	7	0.33615851653695
378	NEW YORK POST	The New York Post	NA	All Editions	NA	October 5, 2000	2000	10	226	Al Gore's tale of the little old lady who "has t	1	0	1	1	1	TRUE	major_paper	NYPOST.COM	0.2497	0.278563205063938	0.0946303818326887	0.0133171439679824	0.0119404736511843	0.0700119437266865	0.235947232901344	0.276963252159173	0.0186263666970032	1	0.278563205063938
379	NEW YORK POST	The New York Post	NA	All Editions	NA	April 21, 2000	2000	4	220	As long as the poor have advocates, the poor wil	1	0	1	1	1	TRUE	major_paper	NYPOST.COM	0.2497	0.0197816726744457	0.084111935684148	0.145854103884698	0.568639193916531	0.00894277325329691	0.0560826272073877	0.107704480462862	0.00888321291663041	4	0.568639193916531
380	NEW YORK POST	The New York Post	Newspaper	Sports+Late City Final	NA	July 9, 2010	2010	7	103	There's one gone every 80 seconds. That is, eve	1	0	1	1	1	TRUE	major_paper	NYPOST.COM	0.2497	0.0109962583278814	0.123310708995303	0.178080078779738	0.136065532493639	0.0115939811001655	0.263193517929182	0.228644842395927	0.0481150799781646	6	0.263193517929182
381	NEW YORK POST	The New York Post	NA	Editorial	NA	November 10, 1998	1998	11	251	Just when you thought a successful policy like w	1	0	1	1	1	TRUE	major_paper	NYPOST.COM	0.2497	0.0700028292782416	0.200268075879478	0.406330009520285	0.0229003211800416	0.00650316826168876	0.0162423798007241	0.254759590903564	0.0229936251759773	3	0.406330009520285
382	NEW YORK POST	The New York Post	NA	PostOpinion	NA	April 10, 1998	1998	4	244	JUST as the crash of 1929 changed the face of po	1	0	1	1	1	TRUE	major_paper	NYPOST.COM	0.2497	0.249472408783145	0.0258555930615913	0.0526373443923907	0.508636510740048	0.00229181986647844	0.00146226176772427	0.0297230682098317	0.129920993178791	4	0.508636510740048
383	NEW YORK POST	The New York Post	Newspaper	All Editions	NA	October 28, 2010	2010	10	106	"The Fairy Job Mother" Tonight at 9 on Lifetime	1	0	1	1	1	TRUE	major_paper	NYPOST.COM	0.2497	0.010984658862765	0.0203494126459428	0.0208025932491828	0.19140197946752	0.0450352775774529	0.23356956201852	0.475244885865207	0.00261163031341018	7	0.475244885865207
384	NEW YORK POST	The New York Post	Newspaper	Sports+Late City Final	NA	November 21, 2004	2004	11	179	Nearly half of New Yorkers who are eligible for	1	0	1	1	1	TRUE	major_paper	NYPOST.COM	0.2497	0.0122077172228609	0.476291678991185	0.299089985380666	0.0412090876920285	0.0193241145955235	0.0645652513662724	0.0516120502618479	0.0357001144896165	2	0.476291678991185
385	NEW YORK POST	The New York Post	Newspaper	Sports+Late City Final	NA	November 6, 2012	2012	11	83	The Issue: Whether President Obama or Mitt Romne	1	0	1	1	1	TRUE	major_paper	NYPOST.COM	0.2497	0.444642569803376	0.0144948038624689	0.0199874888518453	0.138400735825246	0.00822766665618661	0.0157371330592646	0.225883022274256	0.132626579667356	1	0.444642569803376
386	NEW YORK POST	The New York Post	Newspaper	All Editions	NA	November 23, 2015	2015	11	47	Gov . Cuomo insults the legacy of his late fathe	1	0	1	1	1	TRUE	major_paper	NYPOST.COM	0.2497	0.38212028739629	0.087149482327804	0.107502975171791	0.285420827726196	0.00678232560028823	0.00359269007566066	0.0243263483281119	0.103105063373858	1	0.38212028739629
387	NEW YORK POST	The New York Post	Newspaper	All Editions	NA	October 11, 2010	2010	10	106	HIDE your face and grab the kids. Coming soon t	1	0	1	1	1	TRUE	major_paper	NYPOST.COM	0.2497	0.15191583250682	0.165486138475069	0.0353495460471289	0.0394101170787187	0.0658973391496089	0.0916005551033401	0.438309309199126	0.0120311624401886	7	0.438309309199126
388	NEW YORK POST	The New York Post	Newspaper	All Editions	NA	April 1, 2012	2012	4	76	The nightclub business in Alabama must be hungry	1	0	1	1	1	TRUE	major_paper	NYPOST.COM	0.2497	0.0172737651061772	0.188044604488774	0.0040380939150029	0.00824628206312589	0.412018019463625	0.0487304397002562	0.319350631118217	0.002298164144823	5	0.412018019463625
389	NEW YORK POST	The New York Post	Newspaper	All Editions	NA	June 30, 2009	2009	6	114	MY NEW hero isn't a superman or a singer. But he	1	0	1	1	1	TRUE	major_paper	NYPOST.COM	0.2497	0.0119679659289564	0.167272204684971	0.00499548045685557	0.0135094379672422	0.102860528199636	0.0670197920463071	0.630526457440711	0.00184813327531953	7	0.630526457440711
390	NEW YORK POST	The New York Post	Newspaper	Sports+Late City Final	NA	May 16, 2012	2012	5	77	Restaurateur and TV chef Mario Batali has traded	1	0	1	1	1	TRUE	major_paper	NYPOST.COM	0.2497	0.0277051464774234	0.138645775184135	0.0999048550970459	0.0427572779459613	0.0251852193674791	0.208114505999569	0.286222136491331	0.171465083437056	7	0.286222136491331
391	NEW YORK POST	The New York Post	Newspaper	All Editions	NA	April 28, 2010	2010	4	100	MICHAEL Caine's in town. Michael Caine has a sto	1	0	1	1	1	TRUE	major_paper	NYPOST.COM	0.2497	0.00815751182652635	0.03660131856482	0.00253376974160449	0.0152434845469732	0.106786992762777	0.0935135956036585	0.736352561369293	0.000810765584347291	7	0.736352561369293
392	NEW YORK POST	The New York Post	Newspaper	All Editions	NA	February 18, 2010	2010	2	98	WASHINGTON - New York has gotten 43,000 jobs sin	1	0	1	1	1	TRUE	major_paper	NYPOST.COM	0.2497	0.110704474281421	0.17195668099277	0.0934848416761586	0.384384408127581	0.00880933033402806	0.00888300083137892	0.0944765828099465	0.127300680946715	4	0.384384408127581
393	NEW YORK POST	The New York Post	NA	All Editions	NA	June 21, 2000	2000	6	222	The Islanders are off food stamps. That became	1	0	1	1	1	TRUE	major_paper	NYPOST.COM	0.2497	0.1048144222592	0.346310351116267	0.0163685306098024	0.0383552182606069	0.158822706090808	0.0135121421428329	0.222824990993731	0.0989916385267511	2	0.346310351116267
394	NEW YORK POST	The New York Post	Newspaper	All Editions	NA	January 19, 2010	2010	1	97	MANHATTAN * Police are looking for this sticky-	1	0	1	1	1	TRUE	major_paper	NYPOST.COM	0.2497	0.00249452557732804	0.218399190106149	0.00447611042145817	0.00337227310419433	0.667538055110448	0.0676424622864253	0.0354849026661723	0.000592480727825	5	0.667538055110448
395	NEW YORK POST	The New York Post	Newspaper	All Editions	NA	December 12, 2012	2012	12	84	It IS often said that tragedy brings out the bes	1	0	1	1	1	TRUE	major_paper	NYPOST.COM	0.2497	0.0695331370531942	0.278441671948431	0.172722452801953	0.0694731213922404	0.0158713492035567	0.0824367091907708	0.279172558548784	0.0323489998610698	7	0.279172558548784
396	NEW YORK POST	The New York Post	Newspaper	Sports+Late City Final	NA	December 23, 2016	2016	12	36	A Hasidic leader who raised money for Mayor de B	1	1	1	1	1	TRUE	major_paper	NYPOST.COM	0.2497	0.137660123405806	0.476729779085448	0.141374651460662	0.0514797186421856	0.0482804212738868	0.0419601469572666	0.0617973171779141	0.0407178419968309	2	0.476729779085448
397	NEW YORK POST	The New York Post	NA		NA	November 18, 1998	1998	11	251	'Those taxpayers who are notdriven away by the	1	0	1	1	1	TRUE	major_paper	NYPOST.COM	0.2497	0.284296646606355	0.196032547946055	0.0821164401302864	0.0182973934313403	0.0858790673224917	0.0595696490296275	0.189264445093773	0.0845438104400718	1	0.284296646606355
398	NEW YORK POST	The New York Post	Newspaper	All Editions	NA	June 23, 2013	2013	6	66	Once upon a time, accepting food stamps - even a	1	0	1	1	1	TRUE	major_paper	NYPOST.COM	0.2497	0.139870564940777	0.0898088147827009	0.224998289844707	0.062778419333901	0.00944742049443113	0.121486098323861	0.323530855723455	0.0280795365561662	7	0.323530855723455
399	NEW YORK POST	The New York Post	Newspaper	All Editions	NA	March 23, 2017	2017	3	15	KANSAS CITY, Mo. - When Caleb Swanigan backs dow	1	0	1	1	1	TRUE	major_paper	NYPOST.COM	0.2497	0.0265932265009687	0.0286523105188442	0.00712270558580992	0.00577294812119019	0.166839419002976	0.168690650707786	0.595279147632335	0.00104959193009028	7	0.595279147632335
400	NEW YORK POST	The New York Post	Newspaper	All Editions	NA	August 20, 2017	2017	8	20	Expanding their attacks, many longtime critics o	1	0	1	1	1	TRUE	major_paper	NYPOST.COM	0.2497	0.667728596968076	0.0457167942304917	0.0116135195761469	0.168598272700037	0.0148478871447905	0.00400709627942726	0.0724186180351223	0.015069215065907	1	0.667728596968076
401	NEW YORK POST	The New York Post	NA	All Editions	NA	December 31, 2003	2003	12	192	Midtown is turning into Marrakech. An army of s	1	0	1	1	1	TRUE	major_paper	NYPOST.COM	0.2497	0.0094467021949719	0.295251867550923	0.0110843895025677	0.0305833825730273	0.143917350995722	0.166234432472994	0.339486690920902	0.0039951837888922	7	0.339486690920902
402	NEW YORK POST	The New York Post	Newspaper		NA	December 21, 2005	2005	12	168	SEE Dick flop. "Fun With Dick & Jane" casts a w	1	0	1	1	1	TRUE	major_paper	NYPOST.COM	0.2497	0.144454116509655	0.119028828972656	0.0110891584364547	0.126183605769809	0.0509777395001513	0.0285449359210576	0.510965709096796	0.00875590579342112	7	0.510965709096796
403	NEW YORK POST	The New York Post	Newspaper	All Editions	NA	May 5, 2013	2013	5	65	There may be life in the hutch after all. Playbo	1	1	1	1	1	TRUE	major_paper	NYPOST.COM	0.2497	0.0522614574764897	0.277634730817764	0.0139485426965706	0.208022903294105	0.0562475043602846	0.0199171847579899	0.289191480029856	0.0827761965669415	7	0.289191480029856
404	NEW YORK POST	The New York Post	Newspaper	All Editions	NA	December 16, 2012	2012	12	84	The number of Americans signing up for food stam	1	0	1	1	1	TRUE	major_paper	NYPOST.COM	0.2497	0.00901114562967951	0.09761292826064	0.317901500523107	0.501086416249853	0.00362419307014142	0.00672829877913364	0.0227094593986844	0.0413260580887616	4	0.501086416249853
405	NEW YORK POST	The New York Post	Newspaper	All Editions	NA	May 20, 2014	2014	5	53	The Issue: Whether people who receive food stamp	1	0	1	1	1	TRUE	major_paper	NYPOST.COM	0.2497	0.0559087182641774	0.0898162967841983	0.4435832082145	0.0773163097719374	0.00788658760415925	0.106296739973744	0.204152100121662	0.0150400392656214	3	0.4435832082145
406	NEW YORK POST	The New York Post	Newspaper	All Editions	NA	September 1, 2005	2005	9	165	Fernando Ferrer was ambushed by former City Univ	1	0	1	1	1	TRUE	major_paper	NYPOST.COM	0.2497	0.303284472895174	0.292498622355239	0.05414618234115	0.0467480400192272	0.135385938092366	0.0152402331384974	0.100740790351507	0.0519557208068392	1	0.303284472895174
407	NEW YORK POST	The New York Post	Newspaper	All Editions	NA	January 6, 2013	2013	1	61	Belly up to the ATM, boys - drinks are on the ta	1	0	1	1	1	TRUE	major_paper	NYPOST.COM	0.2497	0.0169197378170526	0.287063691412621	0.132591227644669	0.0425408299159684	0.127957431419365	0.0506584159193641	0.209190264045705	0.133078401825254	2	0.287063691412621
408	NEW YORK POST	The New York Post	Newspaper	Sports+Late City Final	NA	October 28, 2005	2005	10	166	The city's worst deadbeat dad - who spent 10 yea	1	0	1	1	1	TRUE	major_paper	NYPOST.COM	0.2497	0.0175246458262889	0.391283028049657	0.0519898547843191	0.0636585406741955	0.15977745750489	0.167124752635636	0.124668548926636	0.0239731715983777	2	0.391283028049657
409	NEW YORK POST	The New York Post	Newspaper	All Editions	NA	October 29, 2006	2006	10	154	A mayoral panel is recommending raises for city	1	0	1	1	1	TRUE	major_paper	NYPOST.COM	0.2497	0.0715664707994228	0.275563060340246	0.0236580730388161	0.322630842230455	0.0225019074994472	0.0162382109999451	0.165070838022884	0.102770597068784	4	0.322630842230455
410	NEW YORK POST	The New York Post	Newspaper	Metro+Sports Extra	NA	December 15, 2005	2005	12	168	WASHINGTON - Sen. Hillary Rodham Clinton cut bac	1	0	1	1	1	TRUE	major_paper	NYPOST.COM	0.2497	0.542717067276462	0.0246860961905665	0.0692724682305318	0.0189975378038868	0.00829692851891269	0.00811436367325803	0.113803453182149	0.214112085124234	1	0.542717067276462
411	NEW YORK POST	The New York Post	Newspaper	Sports+Late City Final	NA	September 9, 2005	2005	9	165	The intense battle for second place in the Democ	1	0	1	1	1	TRUE	major_paper	NYPOST.COM	0.2497	0.413814608185876	0.219933930055725	0.0100795850636478	0.0213802713673017	0.0531247542954234	0.00846535438388536	0.236916198262946	0.0362852983851956	1	0.413814608185876
412	NEW YORK POST	The New York Post	Newspaper	All Editions	NA	July 22, 2009	2009	7	115	YOU don't have to have a lot of green to eat gre	1	0	1	1	1	TRUE	major_paper	NYPOST.COM	0.2497	0.011892279994293	0.160405602761914	0.0897165571403402	0.0519679773394689	0.0379820318039131	0.1188684755939	0.420613414729357	0.108553660636813	7	0.420613414729357
413	NEW YORK POST	The New York Post	Newspaper	All Editions	NA	February 2, 2014	2014	2	50	Another day, another meaningless patch to the jo	1	0	1	1	1	TRUE	major_paper	NYPOST.COM	0.2497	0.273832992959038	0.0230694277850361	0.0630083034759117	0.353038628859087	0.00404904849257216	0.0157485008705255	0.221839987367658	0.0454131101901712	4	0.353038628859087
414	NEW YORK POST	The New York Post	Newspaper	All Editions	NA	February 19, 2015	2015	2	38	The Issue: President Obama's reluctance to ackno	1	0	1	1	1	TRUE	major_paper	NYPOST.COM	0.2497	0.610914167395485	0.0415250426798706	0.019253685447092	0.0125351658139418	0.0742264861612188	0.00878554159281852	0.209848468763209	0.0229114421463647	1	0.610914167395485
415	NEW YORK POST	The New York Post	Newspaper	Sports+Late City Final	NA	February 1, 2014	2014	2	50	THE BRONX * A conniving driver cruising through	1	0	1	1	1	TRUE	major_paper	NYPOST.COM	0.2497	0.00291765872517595	0.25344981339714	0.0111396930608093	0.00353926445358196	0.507150413480228	0.132849032911376	0.0883227952113526	0.000631328760336353	5	0.507150413480228
416	NEW YORK POST	The New York Post	Newspaper	All Editions	NA	June 10, 2013	2013	6	66	It's a riches-to-rags story. Christine Jensen,	1	0	1	1	1	TRUE	major_paper	NYPOST.COM	0.2497	0.0176307451494481	0.219308839407664	0.0394489585939599	0.0337523151662638	0.0457575810046913	0.248644414577293	0.391857118132037	0.00360002796864384	7	0.391857118132037
417	NEW YORK POST	The New York Post	Newspaper	All Editions	NA	May 5, 2013	2013	5	65	Selita Ebanks revealed to us at Food Bank's Can	1	0	1	1	1	TRUE	major_paper	NYPOST.COM	0.2497	0.00867175039279401	0.0661008257904206	0.0449312019564912	0.0154291947264902	0.0299946663538327	0.435503184823428	0.397580624020701	0.00178855193584221	6	0.435503184823428
418	NEW YORK POST	The New York Post	Newspaper	All Editions	NA	March 26, 2014	2014	3	51	With his team heading to the Sweet 16, senior U	1	0	1	1	1	TRUE	major_paper	NYPOST.COM	0.2497	0.0227148401003089	0.0295286572098329	0.0189914867826213	0.00692945970525362	0.0137876361816049	0.0282026382048366	0.877534167901255	0.00231111391428734	7	0.877534167901255
419	NEW YORK POST	The New York Post	Newspaper	All Editions	NA	April 6, 2014	2014	4	52	She was known as Katie, a pretty, popular girl	1	0	1	1	1	TRUE	major_paper	NYPOST.COM	0.2497	0.045129971351245	0.0919631942401751	0.00903151026665127	0.00412980071015345	0.146585415101567	0.214921796477582	0.487121024060645	0.00111728779198089	7	0.487121024060645
420	NEW YORK POST	The New York Post	Newspaper		NA	May 8, 2016	2016	5	29	It's rare when a politician is as honest about h	1	0	1	1	1	TRUE	major_paper	NYPOST.COM	0.2497	0.0354980110353005	0.174405113634578	0.0144322781437329	0.121584556361889	0.0455317036990643	0.0642994527521701	0.518083013464547	0.0261658709087173	7	0.518083013464547
421	NEW YORK POST	The New York Post	NA	All Editions	NA	April 17, 2001	2001	4	208	When is successful welfare reform not a success?	1	0	1	1	1	TRUE	major_paper	NYPOST.COM	0.2497	0.0979904409506146	0.0985802167960984	0.2576766914029	0.217260230254908	0.0286285361167635	0.0393280366396791	0.234715543685233	0.0258203041538034	3	0.2576766914029
422	NEW YORK POST	The New York Post	Newspaper	Sports+Late City Final	NA	November 17, 2016	2016	11	35	The $15 minimum wage is going to end up costing	1	0	1	1	1	TRUE	major_paper	NYPOST.COM	0.2497	0.0213108284145859	0.258410646385501	0.0290034093849928	0.366801828014387	0.00711655356182416	0.00304416518996008	0.0530102858690234	0.261302283179725	4	0.366801828014387
423	NEW YORK POST	The New York Post	Newspaper	Sports+Late City Final	NA	January 22, 2015	2015	1	37	QUEENS * Cops on Wednesday arrested a suspect i	1	0	1	1	1	TRUE	major_paper	NYPOST.COM	0.2497	0.00346692197998105	0.185815980283684	0.00401162394159996	0.00396126572365629	0.578407519553076	0.135273439837829	0.088406799339763	0.000656449340410007	5	0.578407519553076
424	NEW YORK POST	The New York Post	Newspaper	Sports+Late City Final	NA	August 6, 2006	2006	8	152	METS 4 PHILLIES 3 David Wright made a game-sav	1	0	1	1	1	TRUE	major_paper	NYPOST.COM	0.2497	0.046186155481242	0.0374105026056137	0.00400232399279162	0.0173775796195161	0.118889958037061	0.0552953718506809	0.71713164558548	0.00370646282761463	7	0.71713164558548
425	NEW YORK POST	The New York Post	Newspaper		NA	April 2, 2006	2006	4	148	A roiling sea of immigrants - many of them in th	1	0	1	1	1	TRUE	major_paper	NYPOST.COM	0.2497	0.214956505793056	0.329297875161336	0.0336058139446064	0.0232931545346804	0.0428906572583676	0.082972746870489	0.25332062099726	0.0196626254402039	2	0.329297875161336
426	NEW YORK POST	The New York Post	NA	All Editions	NA	November 20, 2000	2000	11	227	Al Gore's team took a hard line on Florida milit	1	0	1	1	1	TRUE	major_paper	NYPOST.COM	0.2497	0.647077186585635	0.104901021811086	0.00736697954473294	0.00852747012103236	0.02482502354379	0.00624328926545147	0.189350320123605	0.0117087090046667	1	0.647077186585635
427	NEW YORK POST	The New York Post	Newspaper	All Editions	NA	November 26, 2010	2010	11	107	A naked man who was spotted in a lawn chair acro	1	0	1	1	1	TRUE	major_paper	NYPOST.COM	0.2497	0.0157340504790257	0.0984041783874106	0.0117740758901959	0.0170382466040486	0.242541918328885	0.0990813787056134	0.512026252198696	0.00339989940612466	7	0.512026252198696
428	NEW YORK POST	The New York Post	Newspaper	All Editions	NA	December 25, 2016	2016	12	36	Federal investigators are questioning leaders in	1	0	1	1	1	TRUE	major_paper	NYPOST.COM	0.2497	0.19517326562086	0.580123261499717	0.00985360542012125	0.0115145127747542	0.0787385899946643	0.00865629692434315	0.0814149698837478	0.0345254978817924	2	0.580123261499717
429	NEW YORK POST	The New York Post	Newspaper	All Editions	NA	September 4, 2012	2012	9	81	The Issue: Clint Eastwood's speech at the Republ	1	0	1	1	1	TRUE	major_paper	NYPOST.COM	0.2497	0.447918261666094	0.0213556479128595	0.00357304244243364	0.0134934354390946	0.0579286788815635	0.0164743068048252	0.415340213303338	0.0239164135497913	1	0.447918261666094
430	NEW YORK POST	The New York Post	Newspaper	All Editions	NA	June 9, 2015	2015	6	42	"All my life needed was a sense of someplace to	1	0	1	1	1	TRUE	major_paper	NYPOST.COM	0.2497	0.0132280232682423	0.0295325559819234	0.00368017957906663	0.00688655978681608	0.0728693936241223	0.28440477328916	0.588799287569265	0.00059922690140464	7	0.588799287569265
431	NEW YORK POST	The New York Post	Newspaper	Sports+Late City Final	NA	May 1, 2012	2012	5	77	WASHINGTON - Forget "hope and change," President	1	0	1	1	1	TRUE	major_paper	NYPOST.COM	0.2497	0.519737150833725	0.0366734944356794	0.0092678423493336	0.152281094609436	0.00796337229445486	0.00222578137544652	0.101017164774413	0.170834099327511	1	0.519737150833725
432	NEW YORK POST	The New York Post	Newspaper	All Editions	NA	September 8, 2012	2012	9	81	The Issue: Former President Bill Clinton's speec	1	0	1	1	1	TRUE	major_paper	NYPOST.COM	0.2497	0.597425481549009	0.0150347411460475	0.014466304778537	0.047525422111589	0.0101397256261541	0.0164457951158918	0.215919735415959	0.0830427942568126	1	0.597425481549009
433	NEW YORK POST	The New York Post	Newspaper	Sports+Late City Final	NA	July 24, 2012	2012	7	79	A Midwood couple spent six years living the high	1	0	1	1	1	TRUE	major_paper	NYPOST.COM	0.2497	0.0104098025354644	0.354677564512146	0.0813833488709872	0.0714385659501662	0.18261819500096	0.167309224069524	0.125629161430885	0.00653413762986775	2	0.354677564512146
434	NEW YORK POST	The New York Post	Newspaper	All Editions	NA	March 18, 2014	2014	3	51	New York Rep. Charlie Rangel says John Boehner h	1	0	1	1	1	TRUE	major_paper	NYPOST.COM	0.2497	0.0514636907042385	0.109951873470013	0.222937695900898	0.125927399976663	0.0261923116805583	0.025756055500424	0.161044412722154	0.27672656004505	8	0.27672656004505
435	NEW YORK POST	The New York Post	Newspaper	All Editions	NA	November 14, 2016	2016	11	35	The DJT office. In its last hectic days it resem	1	0	1	1	1	TRUE	major_paper	NYPOST.COM	0.2497	0.184485973825764	0.079203474888327	0.00537814031547108	0.006153550389652	0.0457746285414979	0.0903655472822206	0.583539836402544	0.00509884835452335	7	0.583539836402544
436	NEW YORK POST	The New York Post	Newspaper	All Editions	NA	August 10, 2009	2009	8	116	Gov. Paterson had to know that his Christmas-in-	1	0	1	1	1	TRUE	major_paper	NYPOST.COM	0.2497	0.103073397679924	0.0602670728610343	0.380176445067597	0.0376025789881731	0.00504486151513791	0.0123192188424156	0.264268733223634	0.137247691822084	3	0.380176445067597
437	NEW YORK POST	The New York Post	NA	PostOpinion	NA	June 18, 1998	1998	6	246	SO many tragic social trends from which we are s	1	0	1	1	1	TRUE	major_paper	NYPOST.COM	0.2497	0.324094764981734	0.0312764216649967	0.0223003430398481	0.362023591504678	0.0463792827848799	0.00985156638587782	0.169200422824388	0.0348736068135979	4	0.362023591504678
438	NEW YORK POST	The New York Post	Newspaper	All Editions	NA	November 14, 2010	2010	11	107	ANNE, 45, has always considered herself middle-	1	0	1	1	1	TRUE	major_paper	NYPOST.COM	0.2497	0.00943318008175575	0.0291737719303393	0.0199465086391564	0.535593868436927	0.00377613311571183	0.0994580004270485	0.297411067761976	0.00520746960708552	4	0.535593868436927
439	NEW YORK POST	The New York Post	NA	Sport+Late City Final	NA	August 11, 1999	1999	8	236	"What they're holding on to is an anachronistic	1	0	1	1	1	TRUE	major_paper	NYPOST.COM	0.2497	0.0710442174175987	0.429207883378647	0.272477717673815	0.0143593767024673	0.0129282276874916	0.0373913921875929	0.150293305845308	0.0122978791070799	2	0.429207883378647
440	NEW YORK POST	The New York Post	Newspaper	Sports+Late City Final	NA	February 2, 2006	2006	2	146	By a 49-1 vote, the City Council yesterday approv	1	0	1	1	1	TRUE	major_paper	NYPOST.COM	0.2497	0.0151455025394407	0.638391621810494	0.180573965524115	0.0496856279583894	0.0130018344901625	0.0109444780711516	0.0255276722217492	0.0667292973844977	2	0.638391621810494
441	NEW YORK POST	The New York Post	Newspaper	Metro	NA	December 27, 2016	2016	12	36	A veteran city worker tasked with helping the mo	1	0	1	1	1	TRUE	major_paper	NYPOST.COM	0.2497	0.0097973842877013	0.551354455574453	0.0510267284467851	0.0188346716020379	0.0291806952775015	0.0989637316029943	0.234882745291805	0.00595958791672176	2	0.551354455574453
442	NEW YORK POST	The New York Post	Newspaper	All Editions	NA	February 16, 2006	2006	2	146	st February 16, 2006 Thursday -N.Y. S CUTEST D	1	0	1	1	1	TRUE	major_paper	NYPOST.COM	0.2497	0.0172260589971617	0.243138027513266	0.0130073387547919	0.0146936791092301	0.362999915053094	0.14078993561805	0.204777819895182	0.00336722505922403	5	0.362999915053094
443	NEW YORK POST	The New York Post	Newspaper		NA	February 18, 2006	2006	2	146	An accused midget-menace and welfare cheat walke	1	0	1	1	1	TRUE	major_paper	NYPOST.COM	0.2497	0.00756026068313633	0.360950079314459	0.0269581647501037	0.00731676400969146	0.343000194393557	0.131461391253332	0.120616141971828	0.00213700362389261	2	0.360950079314459
444	NEW YORK POST	The New York Post	Newspaper	Sports Extra	NA	March 10, 2005	2005	3	159	The "disabled" ex-con who owned an "attack macaq	1	0	1	1	1	TRUE	major_paper	NYPOST.COM	0.2497	0.0136641485905816	0.228493767296726	0.0897720270196648	0.0359098580697876	0.271500608697343	0.197503182988484	0.157204199502163	0.0059522078352511	5	0.271500608697343
445	NEW YORK POST	The New York Post	NA	All Editions	NA	November 24, 2002	2002	11	203	WHO knew? To better enable making an informed ch	1	0	1	1	1	TRUE	major_paper	NYPOST.COM	0.2497	0.0300220933025764	0.217595888287635	0.00776079234410315	0.109126012035178	0.0931875372367292	0.0141973928277965	0.496316665646259	0.0317936183197233	7	0.496316665646259
446	NEW YORK POST	The New York Post	Newspaper	All Editions	NA	August 11, 2009	2009	8	116	Gov. Paterson's $175 million "back to school" bo	1	0	1	1	1	TRUE	major_paper	NYPOST.COM	0.2497	0.130094888493247	0.309188138920854	0.361016506222613	0.026628024000245	0.02448221134805	0.0109176748166601	0.0383262333674146	0.099346322830917	3	0.361016506222613
447	NEW YORK POST	The New York Post	Newspaper	All Editions	NA	December 10, 2012	2012	12	84	The Issue: President Obama's invitation to Rev.	1	0	1	1	1	TRUE	major_paper	NYPOST.COM	0.2497	0.237405671044048	0.0390315588503954	0.0382750100354038	0.037339281899759	0.0407747874840298	0.0127071898299536	0.39297107759936	0.201495423257051	7	0.39297107759936
448	NEW YORK POST	The New York Post	Newspaper	All Editions	NA	December 11, 2012	2012	12	84	Cory Booker can be frugal and still have a fun d	1	0	1	1	1	TRUE	major_paper	NYPOST.COM	0.2497	0.072095801008299	0.217509950879318	0.00948302819151651	0.0192772402858731	0.121380797136082	0.0319362441673596	0.518450977201159	0.00986596113039329	7	0.518450977201159
449	NEW YORK POST	The New York Post	Newspaper	All Editions	NA	May 25, 2012	2012	5	77	Gov. Cuomo's decision to end electronic fingerpr	1	0	1	1	1	TRUE	major_paper	NYPOST.COM	0.2497	0.0224343364159047	0.488527020030344	0.234474791696328	0.0645958881113638	0.00872095236230784	0.0108317500260413	0.149983050775454	0.0204322105822568	2	0.488527020030344
450	NEW YORK POST	The New York Post	Newspaper		NA	April 8, 2007	2007	4	136	Two struggling, unemployed single mothers sharpl	1	0	1	1	1	TRUE	major_paper	NYPOST.COM	0.2497	0.00703936873350352	0.0609281662907793	0.269968418827584	0.0469142122255103	0.00619158295787684	0.315850096109417	0.2897065314053	0.00340162345002874	6	0.315850096109417
451	NEW YORK POST	The New York Post	Newspaper	All Editions	NA	October 26, 2015	2015	10	46	Catching this man was a real chore. A Pennsylva	1	0	1	1	1	TRUE	major_paper	NYPOST.COM	0.2497	0.0138688181638	0.204037503587132	0.00725766326923013	0.012189677423424	0.15747504558655	0.13989051362177	0.463434153161216	0.00184662518687678	7	0.463434153161216
452	NEW YORK POST	The New York Post	Newspaper	Sports+Late City Final	NA	September 23, 2005	2005	9	165	Democratic mayoral hopeful Fernando Ferrer said	1	0	1	1	1	TRUE	major_paper	NYPOST.COM	0.2497	0.214020133759998	0.24950788927704	0.362065621727724	0.0171576638328816	0.0111652696125551	0.0225348484410874	0.0991260234515405	0.0244225498971731	3	0.362065621727724
453	NEW YORK POST	The New York Post	Newspaper	All Editions	NA	April 15, 2013	2013	4	64	WASHINGTON - Illegal immigrants will not have ac	1	0	1	1	1	TRUE	major_paper	NYPOST.COM	0.2497	0.11390476693149	0.416072285148669	0.0724918033231396	0.0338348938937789	0.0181644638950287	0.010925324377046	0.141530962800443	0.193075499630405	2	0.416072285148669
454	NEW YORK POST	The New York Post	Newspaper	All Editions	NA	February 17, 2006	2006	2	146	The Patrolmen's Benevolent Association has been	1	0	1	1	1	TRUE	major_paper	NYPOST.COM	0.2497	0.0219388437290729	0.255520334486798	0.0849177972503977	0.276918005814445	0.0325149974162688	0.0244816855132752	0.27924172616505	0.0244666096246915	7	0.27924172616505
455	NEW YORK POST	The New York Post	Newspaper	All Editions	NA	January 12, 2014	2014	1	49	Fifty years ago, President Johnson launched the	1	0	1	1	1	TRUE	major_paper	NYPOST.COM	0.2497	0.15644369551662	0.0203684866330339	0.182928486115486	0.470219535987497	0.00317230749298035	0.0247901800754436	0.0984850208496273	0.0435922873293119	4	0.470219535987497
456	NEW YORK POST	The New York Post	NA	Entertainment	NA	February 16, 1998	1998	2	242	EVERYBODY loves pets: Even my super says, "I don	1	0	1	1	1	TRUE	major_paper	NYPOST.COM	0.2497	0.00764616667855735	0.0202164276625091	0.00349009067920249	0.00440496051997081	0.0996524943200478	0.171440082130691	0.692541621216905	0.000608156792116404	7	0.692541621216905
457	NEW YORK POST	The New York Post	NA	All Editions	NA	February 26, 1999	1999	2	230	Unemployment is at historic lows in America thes	1	0	1	1	1	TRUE	major_paper	NYPOST.COM	0.2497	0.0446247423153726	0.0957796195857634	0.298676545297662	0.255742009315063	0.00486888725903078	0.0206173967571493	0.257307161541828	0.0223836379281315	3	0.298676545297662
458	NEW YORK POST	The New York Post	NA	All Editions	NA	February 26, 1999	1999	2	230	THE drop in the number of people using food stamp	1	0	1	1	1	TRUE	major_paper	NYPOST.COM	0.2497	0.0719591276180004	0.196065507944213	0.155214105082437	0.242663734262019	0.0193263948310138	0.0348107079414141	0.245009490871639	0.034950931449263	7	0.245009490871639
459	NEW YORK POST	The New York Post	Newspaper	All Editions	NA	May 26, 2012	2012	5	77	Mayor Bloomberg this week unloaded on Gov. Cuomo	1	0	1	1	1	TRUE	major_paper	NYPOST.COM	0.2497	0.044475203475668	0.409446673323462	0.183527807256891	0.0384765597546909	0.0110077754130558	0.0165970356920014	0.266955823356463	0.0295131217277679	2	0.409446673323462
460	NEW YORK POST	The New York Post	NA	All Editions	NA	February 23, 2000	2000	2	218	Al Gore and Bill Bradley put on a hard-fought, i	1	0	1	1	1	TRUE	major_paper	NYPOST.COM	0.2497	0.672146417351645	0.0481643701454011	0.0679044646338843	0.0374145723014909	0.00999078326642807	0.0260059630732344	0.0623907805586453	0.0759826486692707	1	0.672146417351645
461	NEW YORK POST	The New York Post	Newspaper	All Editions	NA	March 26, 2014	2014	3	51	A proposal to require retail and grocery stores	1	0	1	1	1	TRUE	major_paper	NYPOST.COM	0.2497	0.0222032033400134	0.485244449609012	0.0217276754638296	0.0233605163584242	0.0451699215014258	0.0283389288900273	0.294589126796068	0.0793661780411997	2	0.485244449609012
462	NEW YORK POST	The New York Post	Newspaper	Sports Extra	NA	December 5, 2011	2011	12	96	The harsh recession drove more New Yorkers to ap	1	0	1	1	1	TRUE	major_paper	NYPOST.COM	0.2497	0.0202673394012519	0.178280511689514	0.14574183779799	0.238957672006211	0.0149500374005255	0.27469831267546	0.090964486220893	0.0361398028081542	6	0.27469831267546
463	NEW YORK POST	The New York Post	NA	All Editions	NA	August 4, 1999	1999	8	236	Long after the U.S. Department of Agriculture ga	1	0	1	1	1	TRUE	major_paper	NYPOST.COM	0.2497	0.0493987568944201	0.564630104838321	0.0877321470029838	0.0197037078486269	0.0203944744400739	0.0210601540179208	0.199692587594533	0.0373880673631202	2	0.564630104838321
464	NEW YORK POST	The New York Post	Newspaper	All Editions	NA	February 4, 2012	2012	2	74	New job numbers out of Washington yesterday sugg	1	0	1	1	1	TRUE	major_paper	NYPOST.COM	0.2497	0.0297267935240256	0.0217345919202144	0.0121477225731945	0.720785494334828	0.00288520359830079	0.00365744108520277	0.13076956387067	0.0782931890935642	4	0.720785494334828
465	NEW YORK POST	The New York Post	NA	All Editions	NA	May 27, 1999	1999	5	233	"You wake up in the morning and you look around	1	0	1	1	1	TRUE	major_paper	NYPOST.COM	0.2497	0.00321294163269762	0.0415656347192745	0.0218468157175054	0.00702045852560673	0.018071189391091	0.565581459626334	0.34207169531493	0.000629805072560813	6	0.565581459626334
466	NEW YORK POST	The New York Post	NA	All Editions	NA	October 29, 2000	2000	10	226	It's time for a woman and a Democrat to represen	1	0	1	1	1	TRUE	major_paper	NYPOST.COM	0.2497	0.344056654190511	0.177687060738936	0.0709971315702948	0.0102206318630931	0.0191917515164814	0.156169063729768	0.083948404409719	0.137729301981196	1	0.344056654190511
467	NEW YORK POST	The New York Post	NA		NA	August 2, 1999	1999	8	236	"We are having a hard time - there is not enough	1	0	1	1	1	TRUE	major_paper	NYPOST.COM	0.2497	0.0323349175777204	0.112475849326168	0.046314951282174	0.0136175506124592	0.0318839237603363	0.496924404263579	0.261619070904125	0.00482933227343834	6	0.496924404263579
468	NEW YORK POST	The New York Post	Newspaper	All Editions	NA	November 26, 2010	2010	11	107	DON'T expect wedding bells in the governor's man	1	0	1	1	1	TRUE	major_paper	NYPOST.COM	0.2497	0.0240858284518799	0.127546952783696	0.039390397210389	0.01685632914471	0.108005610552363	0.210648143126553	0.469877868999083	0.00358886973132468	7	0.469877868999083
469	NEW YORK POST	The New York Post	Newspaper	All Editions	NA	October 1, 2010	2010	10	106	POLYGAMY is so hot on TV right now, it threatens	1	0	1	1	1	TRUE	major_paper	NYPOST.COM	0.2497	0.0496439051428239	0.0365784275703099	0.0148787778862237	0.0298827497867649	0.0447357865624871	0.121550342798606	0.699523070171177	0.0032069400816078	7	0.699523070171177
470	NEW YORK POST	The New York Post	NA	All Editions	NA	August 13, 1999	1999	8	236	THE husband of a powerful Manhattan literary ag	1	0	1	1	1	TRUE	major_paper	NYPOST.COM	0.2497	0.216634869154925	0.160121711752128	0.00707506250044535	0.010843239559817	0.175517567359252	0.0665097357564333	0.35974880577138	0.00354900814561947	7	0.35974880577138
471	NEW YORK POST	The New York Post	Newspaper	Sports+Late City Final	NA	February 16, 2006	2006	2	146	The city's reduced starting salary for the NYPD'	1	0	1	1	1	TRUE	major_paper	NYPOST.COM	0.2497	0.0109676781826791	0.447099032264056	0.0760182117761865	0.193078429321939	0.0938753127652778	0.0255926121590767	0.116238420951849	0.0371303025789361	2	0.447099032264056
472	NEW YORK POST	The New York Post	Newspaper	All Editions	NA	July 31, 2016	2016	7	31	When J.D. Vance was a boy, his beloved grandmot	1	0	1	1	1	TRUE	major_paper	NYPOST.COM	0.2497	0.192667895132966	0.0118676060184816	0.0341454852876944	0.143725615326439	0.0606165957610722	0.0797776298653421	0.471968961266651	0.0052302113413539	7	0.471968961266651
473	NEW YORK POST	The New York Post	Newspaper	All Editions	NA	May 30, 2012	2012	5	77	Gov. Cuomo's hand-crafted ethics watchdog - the	1	0	1	1	1	TRUE	major_paper	NYPOST.COM	0.2497	0.275232055059091	0.309752416028867	0.0686577564893568	0.0274029930431003	0.0177928792228214	0.013028541772966	0.264184286976516	0.0239490714072819	2	0.309752416028867
474	NEW YORK POST	The New York Post	Newspaper	All Editions	NA	June 13, 2013	2013	6	66	No one ever said Anthony Weiner lacks confidence	1	0	1	1	1	TRUE	major_paper	NYPOST.COM	0.2497	0.359749277208679	0.196284256871348	0.034945034260101	0.050165304729022	0.0155315239959568	0.0103629709383936	0.227154641233005	0.105806990763494	1	0.359749277208679
475	NEW YORK POST	The New York Post	Newspaper	All Editions	NA	May 23, 2007	2007	5	137	Mayor Bloomberg and City Council Speaker Christi	1	0	1	1	1	TRUE	major_paper	NYPOST.COM	0.2497	0.016132359725661	0.432713888839953	0.30254528389376	0.0205840552648988	0.0212108955323881	0.0753655222390869	0.117423360731383	0.0140246337728694	2	0.432713888839953
476	NEW YORK POST	The New York Post	Newspaper	All Editions	NA	June 25, 2012	2012	6	78	A Midtown mecca for comic-book geeks is swooping	1	0	1	1	1	TRUE	major_paper	NYPOST.COM	0.2497	0.0118793459607055	0.162135515732276	0.00876540435366983	0.0240566188384387	0.0245929731179185	0.0851621714100838	0.681013004807251	0.00239496577965659	7	0.681013004807251
477	NEW YORK POST	The New York Post	Newspaper	All Editions	NA	December 12, 2011	2011	12	96	The Issue: Gov. Cuomo's embrace of a tax hike de	1	0	1	1	1	TRUE	major_paper	NYPOST.COM	0.2497	0.319910128722349	0.0689501813945453	0.0293392224622389	0.0987900804620562	0.0335345948744766	0.0562875552856662	0.250449672838831	0.142738563959837	1	0.319910128722349
478	NEW YORK POST	The New York Post	NA	Metro	NA	January 22, 1999	1999	1	229	The $3-a-day diet of junk food billionaire papa	1	0	1	1	1	TRUE	major_paper	NYPOST.COM	0.2497	0.0102534450548722	0.0747231297862996	0.13493763234381	0.156278363202924	0.00803032708880053	0.261747699241998	0.333929169335723	0.0201002339455738	7	0.333929169335723
479	NEW YORK POST	The New York Post	NA	All Editions	NA	April 20, 2002	2002	4	196	Troubling news: The Bloomberg administration has	1	0	1	1	1	TRUE	major_paper	NYPOST.COM	0.2497	0.195662433983013	0.372378097050755	0.0502422141677392	0.0443943761468419	0.00952450487941484	0.00976648307130618	0.302826527435754	0.0152053632651765	2	0.372378097050755
480	NEW YORK POST	The New York Post	Newspaper	Sports+Late City Final	NA	February 10, 2009	2009	2	110	Meet the octet. Nadya Suleman yesterday introdu	1	0	1	1	1	TRUE	major_paper	NYPOST.COM	0.2497	0.00691253988684397	0.132820120169062	0.0999989797491759	0.0464392451244829	0.0138640181926599	0.365035353487086	0.332376425234151	0.00255331815653964	6	0.365035353487086
481	NEW YORK POST	The New York Post	Newspaper	Sports+Late City Final	NA	November 1, 2012	2012	11	83	WASHINGTON - Mitt Romney yesterday softened his	0	0	0	1	1	TRUE	major_paper	NYPOST.COM	0.2497	0.514493471086037	0.056511622871588	0.0371219245032999	0.046778619495578	0.0371115132989589	0.0626149541102418	0.230280040842382	0.0150878537919143	1	0.514493471086037
482	NEW YORK POST	The New York Post	NA	All Editions	NA	June 4, 2002	2002	6	198	WASHINGTON knows exactly where $20 billion of yo	1	0	1	1	1	TRUE	major_paper	NYPOST.COM	0.2497	0.0165913478250003	0.151333100125282	0.0342899262507119	0.26149544336909	0.00552786939638508	0.00796227940002012	0.336967804977657	0.185832228655854	7	0.336967804977657
483	NEW YORK POST	The New York Post	Newspaper	Sports+Late City Final	NA	May 6, 2005	2005	5	161	A sanitation worker bagged nearly $200,000 in pu	1	0	1	1	1	TRUE	major_paper	NYPOST.COM	0.2497	0.0114490430465703	0.312050273513371	0.136731882034251	0.0317447665986255	0.0811077463708966	0.233222269808408	0.187584551968865	0.00610946665901234	2	0.312050273513371
484	NEW YORK POST	The New York Post	Newspaper	All Editions	NA	December 16, 2009	2009	12	120	Successful extortionists everywhere know enough	1	0	1	1	1	TRUE	major_paper	NYPOST.COM	0.2497	0.0783390401772354	0.228017170476545	0.0741285544095396	0.334133193169695	0.0136090577348343	0.0576091903391401	0.162850791640475	0.0513130020525363	4	0.334133193169695
485	NEW YORK POST	The New York Post	Newspaper	All Editions	NA	September 8, 2005	2005	9	165	MATTHEW Modine is my friend. I love Matthew Modi	1	0	1	1	1	TRUE	major_paper	NYPOST.COM	0.2497	0.119583586558741	0.0602869475293062	0.0116096007430567	0.0131138869387013	0.0586227426892479	0.153670953653824	0.579897495134663	0.00321478675246044	7	0.579897495134663
486	NEW YORK POST	The New York Post	Newspaper	All Editions	NA	March 7, 2005	2005	3	159	She's been fighting for her rightful share of he	1	0	1	1	1	TRUE	major_paper	NYPOST.COM	0.2497	0.00666830997708194	0.280519431207238	0.0119123305746678	0.0337739552706101	0.127185687279174	0.241258822761253	0.296380212352901	0.00230125057707435	7	0.296380212352901
487	NEW YORK POST	The New York Post	Newspaper	All Editions	NA	July 30, 2004	2004	7	175	Gov. Pataki yesterday vetoed a bill raising the	1	0	1	1	1	TRUE	major_paper	NYPOST.COM	0.2497	0.081632331579992	0.146676641258449	0.0803936910163761	0.350178042926026	0.0574623022118349	0.0112119064714656	0.0331076572073143	0.239337427328543	4	0.350178042926026
488	NEW YORK POST	The New York Post	Newspaper	All Editions	NA	September 26, 2004	2004	9	177	The city is trying to "fix" the tragedy of unwan	1	0	1	1	1	TRUE	major_paper	NYPOST.COM	0.2497	0.0127963123758933	0.317794073166294	0.121737772996629	0.0149255690286798	0.104307825114723	0.235017644415903	0.18801117457337	0.00540962832850955	2	0.317794073166294
489	NEW YORK POST	The New York Post	Newspaper	All Editions	NA	May 19, 2006	2006	5	149	Cops' starting salaries would jump from $25,000	1	0	1	1	1	TRUE	major_paper	NYPOST.COM	0.2497	0.0127926767828215	0.52219174126123	0.0113917470483069	0.195853728092868	0.102840696775645	0.0130492800295939	0.106228618539704	0.0356515114698316	2	0.52219174126123
490	NEW YORK POST	The New York Post	Newspaper	All Editions	NA	September 24, 2006	2006	9	153	Like his campaign against guns and the smoking b	1	0	1	1	1	TRUE	major_paper	NYPOST.COM	0.2497	0.0342336028411343	0.169630003745263	0.306627494426352	0.26196398008606	0.00886742402472929	0.033618192709417	0.169287728544031	0.0157715736230135	3	0.306627494426352
491	NEW YORK POST	The New York Post	Newspaper	Sports+Late City Final	NA	March 13, 2013	2013	3	63	It could have been the $325,000 robotic squirrel	1	0	1	1	1	TRUE	major_paper	NYPOST.COM	0.2497	0.284440206231478	0.0252302835281997	0.0222915499654563	0.217135737757896	0.0206101503811459	0.0142995099992075	0.284091203575077	0.13190135856154	1	0.284440206231478
492	NEW YORK POST	The New York Post	Newspaper	Metro	NA	August 6, 2006	2006	8	152	METS 4 PHILLIES 3 David Wright was so angry at	1	0	1	1	1	TRUE	major_paper	NYPOST.COM	0.2497	0.0564504285249819	0.0269869698640519	0.00360494550208086	0.0131291361481145	0.087481183572809	0.059323148948772	0.750594097599005	0.00243008984018461	7	0.750594097599005
493	NEW YORK POST	The New York Post	Newspaper	All Editions	NA	January 3, 2006	2006	1	145	TO: The Business Roundtable FROM: Lord Curmudg	1	0	1	1	1	TRUE	major_paper	NYPOST.COM	0.2497	0.119406594255438	0.0693403792046942	0.0136820158875749	0.186138303211547	0.00553473657198824	0.00621941375626008	0.555877498956938	0.0438010581555597	7	0.555877498956938
494	NEW YORK POST	The New York Post	Newspaper	All Editions	NA	January 7, 2014	2014	1	49	The Issue: Whether education, hard work and a he	1	0	1	1	1	TRUE	major_paper	NYPOST.COM	0.2497	0.118370205899548	0.0190801676621424	0.155516666283391	0.180366065891688	0.00417896337658529	0.0261968149605306	0.481993507828915	0.0142976080972008	7	0.481993507828915
495	NEW YORK POST	The New York Post	Newspaper	All Editions	NA	January 15, 2006	2006	1	145	Red tape is keeping nearly half of eligible New	1	0	1	1	1	TRUE	major_paper	NYPOST.COM	0.2497	0.0109750198047763	0.443434566882564	0.21785425126379	0.101408676430959	0.0242138660755726	0.0838313240942595	0.0831805469380302	0.0351017485100486	2	0.443434566882564
496	NEW YORK POST	The New York Post	Newspaper	Sports+Late City Final	NA	September 9, 2014	2014	9	57	A home built like a castle in Connecticut is bei	1	0	1	1	1	TRUE	major_paper	NYPOST.COM	0.2497	0.0152650160902233	0.167977557133246	0.0209344526803859	0.0557266513573516	0.224210135477715	0.269402260695813	0.243767301526675	0.00271662503858929	6	0.269402260695813
497	NEW YORK POST	The New York Post	NA	Metro	NA	January 30, 1998	1998	1	241	Many students yesterday gave failing marks to Ma	1	0	1	1	1	TRUE	major_paper	NYPOST.COM	0.2497	0.00927383637400674	0.252814074565343	0.119421495426659	0.142884799625128	0.0161840337590692	0.170855901203701	0.271460111743601	0.0171057473024922	7	0.271460111743601
498	NEW YORK POST	The New York Post	Newspaper	All Editions	NA	April 26, 2009	2009	4	112	Mayor Bloomberg says it's too early to tell whet	1	0	1	1	1	TRUE	major_paper	NYPOST.COM	0.2497	0.0327518378729342	0.163008342603453	0.39263784003076	0.16544879340719	0.00936381694831444	0.0404554112979583	0.178975646442221	0.0173583113971678	3	0.39263784003076
499	NEW YORK POST	The New York Post	Newspaper	All Editions	NA	May 29, 2013	2013	5	65	There's often magic and meaning in round numbers	1	0	1	1	1	TRUE	major_paper	NYPOST.COM	0.2497	0.0227339234022893	0.264391623029249	0.262751548334224	0.173375576469814	0.00549817386671535	0.0110736918601123	0.156331715059268	0.103843747978329	2	0.264391623029249
500	NEW YORK POST	The New York Post	Newspaper		NA	June 14, 2009	2009	6	114	I dupe, I dupe! While political arguments rage,	1	0	1	1	1	TRUE	major_paper	NYPOST.COM	0.2497	0.0347203271243801	0.299812615958113	0.0132999785199459	0.00992875940158197	0.136900627207262	0.203841702493614	0.299100733875995	0.00239525541910729	2	0.299812615958113
501	NEW YORK POST	The New York Post	Newspaper	Sports+Late City Final	NA	April 13, 2007	2007	4	136	The feds busted eight bodega owners and employee	1	0	1	1	1	TRUE	major_paper	NYPOST.COM	0.2497	0.0284754232060834	0.639834823050544	0.0277667263720186	0.0269166178281546	0.123600385595076	0.0556763965214554	0.0819241844203966	0.0158054430062711	2	0.639834823050544
502	NEW YORK POST	The New York Post	Newspaper	All Editions	NA	September 19, 2016	2016	9	33	SHARPLY divided politicians on both sides of the	1	0	1	1	1	TRUE	major_paper	NYPOST.COM	0.2497	0.42644384539961	0.0127729043904556	0.0279587979876083	0.0302797605409364	0.00523307572889274	0.0237206057959786	0.449875893539775	0.0237151166167436	7	0.449875893539775
503	NEW YORK POST	The New York Post	NA	All Editions	NA	April 13, 2001	2001	4	208	IT'S a memorial poster to guts and glory. "That	1	0	1	1	1	TRUE	major_paper	NYPOST.COM	0.2497	0.322625309240934	0.0546984138622091	0.0396066560152952	0.0202638174853252	0.0344919625865774	0.0420039762989078	0.419102995021311	0.067206869489441	7	0.419102995021311
504	NEW YORK POST	The New York Post	Newspaper	Metro	NA	December 23, 2016	2016	12	36	A Satmar leader who raised money for Mayor de Bl	1	1	1	1	1	TRUE	major_paper	NYPOST.COM	0.2497	0.145616186539479	0.42375114330234	0.130491301346817	0.0804611544954505	0.0490163702485711	0.042254172149952	0.0885725837959698	0.0398370881214215	2	0.42375114330234
505	NEW YORK POST	The New York Post	NA	All Editions	NA	September 9, 2001	2001	9	213	As the Democratic mayoral hopefuls tried to keep	1	0	1	1	1	TRUE	major_paper	NYPOST.COM	0.2497	0.279026287617945	0.21038466765798	0.0441244028962868	0.0258509913989845	0.0889261992075703	0.0132577100265955	0.234954273446841	0.103475467747797	1	0.279026287617945
506	NEW YORK POST	The New York Post	NA	News	NA	December 4, 1998	1998	12	252	Microsoft boss Bill Gates plans to let his kids	1	0	1	1	1	TRUE	major_paper	NYPOST.COM	0.2497	0.0413921813559202	0.147548098996685	0.0575840507688272	0.194226555556813	0.0189470740290485	0.0845155730205982	0.384295949129051	0.0714905171430568	7	0.384295949129051
507	NEW YORK POST	The New York Post	NA	All Editions	NA	July 2, 1999	1999	7	235	SONIA KING walked out of the West Harlem junior	1	0	1	1	1	TRUE	major_paper	NYPOST.COM	0.2497	0.00579220852930458	0.165357407537508	0.113067460919394	0.0112860240213559	0.094508827239759	0.217152966177905	0.389599422206564	0.0032356833682099	7	0.389599422206564
508	NEW YORK POST	The New York Post	Newspaper	All Editions	NA	January 25, 2004	2004	1	169	DEARLY beloved, we are gathered here to speak ab	1	0	1	1	1	TRUE	major_paper	NYPOST.COM	0.2497	0.148016745371098	0.0414206254366587	0.00711006515676506	0.0636967551790199	0.177560614758281	0.0746928261274558	0.481982939531858	0.00551942843886378	7	0.481982939531858
509	NEW YORK POST	The New York Post	Newspaper	All Editions	NA	February 9, 2012	2012	2	74	WASHINGTON - Americans have grown more dependent	1	0	1	1	1	TRUE	major_paper	NYPOST.COM	0.2497	0.0787609720846638	0.0187011936264975	0.254431085077274	0.581227811196989	0.000944828972493685	0.00302431793802281	0.0179149855784305	0.0449948055256294	4	0.581227811196989
510	NEW YORK POST	The New York Post	Newspaper	All Editions	NA	December 5, 2016	2016	12	36	The Issue: President-elect Donald Trump negotiat	1	0	1	1	1	TRUE	major_paper	NYPOST.COM	0.2497	0.301106259768489	0.0985352721780393	0.0398991765364647	0.165961063945022	0.033648471821931	0.02318891804445	0.272634496210142	0.0650263414954629	1	0.301106259768489
511	NEW YORK POST	The New York Post	NA	All Editions	NA	January 25, 2000	2000	1	217	MANCHESTER, N.H. THE wind howled across the gli	1	0	1	1	1	TRUE	major_paper	NYPOST.COM	0.2497	0.458936666037188	0.0197939003850373	0.0092281108233826	0.00728830232189766	0.0272393031667427	0.0976091044171957	0.346243457282782	0.033661155565774	1	0.458936666037188
512	NEW YORK POST	The New York Post	Newspaper	Late City Final	NA	March 29, 2007	2007	3	135	A school crossing guard was arrested yesterday f	1	0	1	1	1	TRUE	major_paper	NYPOST.COM	0.2497	0.00729834911393397	0.451822350519281	0.220621889639157	0.0167389530194957	0.133570752629864	0.124007566467394	0.0396700830009299	0.00627005560994318	2	0.451822350519281
513	NEW YORK POST	The New York Post	Newspaper	All Editions	NA	October 7, 2014	2014	10	58	Facebook's 15 percent stock rise since it said i	1	0	1	1	1	TRUE	major_paper	NYPOST.COM	0.2497	0.0411947607824295	0.0882852311557208	0.0146973432460286	0.518502648935829	0.0316744745420499	0.00526624560294554	0.111220744886561	0.189158550848436	4	0.518502648935829
514	NEW YORK POST	The New York Post	Newspaper	All Editions	NA	January 7, 2013	2013	1	61	'If you're using a debit card at a casino or str	1	0	1	1	1	TRUE	major_paper	NYPOST.COM	0.2497	0.0576328719963792	0.229642340035451	0.210285775368419	0.0206682745700829	0.067058299039319	0.022212644629218	0.141409559534662	0.251090234826469	8	0.251090234826469
515	NEW YORK POST	The New York Post	Newspaper	All Editions	NA	July 8, 2012	2012	7	79	Mitt Romney is a good man. He's smart, successfu	1	0	1	1	1	TRUE	major_paper	NYPOST.COM	0.2497	0.450094686031748	0.023085573433312	0.0341455490780551	0.17243634793412	0.0140496874166786	0.00600927557803285	0.25589081830936	0.0442880622186936	1	0.450094686031748
516	NEW YORK POST	The New York Post	Newspaper	All Editions	NA	November 15, 2009	2009	11	119	Beggars can't be choosers - unless they're in N	1	0	1	1	1	TRUE	major_paper	NYPOST.COM	0.2497	0.00320118080747744	0.108982747020403	0.339235384038277	0.175110059068245	0.00573864403512652	0.291162410208677	0.0677562459264251	0.00881332889536888	3	0.339235384038277
517	NEW YORK POST	The New York Post	Newspaper	All Editions	NA	December 11, 2011	2011	12	96	It took more than 65 years, but a brother and si	1	0	1	1	1	TRUE	major_paper	NYPOST.COM	0.2497	0.0568989567397992	0.12946164863362	0.0179517898316041	0.036463874625693	0.0744783105569441	0.470936583899317	0.198683881008836	0.0151249547041866	6	0.470936583899317
518	NEW YORK POST	The New York Post	NA	All Editions	NA	April 28, 2002	2002	4	196	New York last week was treated to a full ration	1	0	1	1	1	TRUE	major_paper	NYPOST.COM	0.2497	0.0302109700915695	0.102158183268612	0.0254545029756661	0.636079657357082	0.0287876728002873	0.0243253749044337	0.140108214534695	0.0128754240676537	4	0.636079657357082
519	NEW YORK POST	The New York Post	NA	All Editions	NA	July 1, 2003	2003	7	187	BECAUSE the light that was Katharine Hepburn dim	1	0	1	1	1	TRUE	major_paper	NYPOST.COM	0.2497	0.0110624352569558	0.0817945261191935	0.00602618730237723	0.00868226999672837	0.115048393328024	0.162971082985527	0.613286728562065	0.00112837644912903	7	0.613286728562065
520	NEW YORK POST	The New York Post	NA	All Editions	NA	May 28, 1999	1999	5	233	New Yorkers opened their hearts to the Brooklyn	1	0	1	1	1	TRUE	major_paper	NYPOST.COM	0.2497	0.00314925872094768	0.0436129140418458	0.00809979689983206	0.00466403595975846	0.0153192414633612	0.55638781558054	0.368373409020601	0.000393528313113704	6	0.55638781558054
521	NEW YORK POST	The New York Post	NA	All Editions	NA	February 21, 2002	2002	2	194	FORMER Mayor Ed Koch and Rep. Charles Rangel (D-	1	0	1	1	1	TRUE	major_paper	NYPOST.COM	0.2497	0.431650172504676	0.100082155462582	0.00841242435981114	0.0161132959302214	0.011590576990356	0.00643388222826378	0.384813606075674	0.0409038864484155	1	0.431650172504676
522	NEW YORK POST	The New York Post	Newspaper	All Editions	NA	May 27, 2017	2017	5	17	The Issue: Trump's budget plan for 2018, which w	1	0	1	1	1	TRUE	major_paper	NYPOST.COM	0.2497	0.243703839009117	0.0795573754585865	0.0620034888610022	0.0820700321306317	0.0180232280417147	0.0109953167910049	0.160148218642232	0.343498501065711	8	0.343498501065711
523	NEW YORK POST	The New York Post	NA	All Editions	NA	October 12, 2002	2002	10	202	It's unfortunate that New York's Bravest are get	1	0	1	1	1	TRUE	major_paper	NYPOST.COM	0.2497	0.0943026840338397	0.328791587130554	0.0251327300037391	0.117437642143421	0.096285568592076	0.0416801444416376	0.276814364335793	0.0195552793189398	2	0.328791587130554
524	NEW YORK POST	The New York Post	NA	All Editions	NA	December 13, 2002	2002	12	204	IT takes real strength to stay off welfare when	1	0	1	1	1	TRUE	major_paper	NYPOST.COM	0.2497	0.024699968908288	0.0205946689759867	0.261241252342493	0.0223072271547281	0.0100464159745797	0.219791523668076	0.437593508916426	0.00372543405942227	7	0.437593508916426
525	NEW YORK POST	The New York Post	Newspaper		NA	March 25, 2005	2005	3	159	Daily News President Les Goodstein yesterday sai	0	0	0	1	1	TRUE	major_paper	NYPOST.COM	0.2497	0.0527395261989824	0.262946172520285	0.0381205339063853	0.0268852899823685	0.0990461320093558	0.110229299420614	0.381102140877364	0.0289309050846458	7	0.381102140877364
526	NEW YORK POST	The New York Post	Newspaper	All Editions	NA	December 6, 2009	2009	12	120	THERE was one thing Ol' Dirty Bastard loved more	1	0	1	1	1	TRUE	major_paper	NYPOST.COM	0.2497	0.0107445285535786	0.0485819932468883	0.0109193228588628	0.00936617238961322	0.247959941303686	0.124222460165868	0.54659160820528	0.00161397327622278	7	0.54659160820528
527	NEW YORK POST	The New York Post	Newspaper	All Editions	NA	October 12, 2012	2012	10	82	The Issue: Smokers with low incomes who continue	1	0	1	1	1	TRUE	major_paper	NYPOST.COM	0.2497	0.0255411050547643	0.0835778281184289	0.0672864985271167	0.327676168012856	0.0145842738234761	0.0691078885130205	0.245240397758417	0.16698584019192	4	0.327676168012856
528	NEW YORK POST	The New York Post	Newspaper	All Editions	NA	August 21, 2005	2005	8	164	MEGADETH founder, vocalist and guitarist Dave Mu	1	0	1	1	1	TRUE	major_paper	NYPOST.COM	0.2497	0.0632158358314476	0.0241338635435399	0.0112013261906766	0.028270877059115	0.0440398751066935	0.0779941019211942	0.746856569050088	0.00428755129724553	7	0.746856569050088
529	NEW YORK POST	The New York Post	Newspaper	All Editions	NA	September 19, 2004	2004	9	177	On Tuesday, votes in local primaries presented a	1	0	1	1	1	TRUE	major_paper	NYPOST.COM	0.2497	0.188042649470041	0.210360653359949	0.159181366368068	0.182149941742924	0.0092224597291362	0.00893266461126939	0.129006019738573	0.113104244980038	2	0.210360653359949
530	NEW YORK POST	The New York Post	Newspaper	All Editions	NA	October 25, 2012	2012	10	82	FOUR frustratingly long years ago, a war weary a	1	0	1	1	1	TRUE	major_paper	NYPOST.COM	0.2497	0.418729033825569	0.00727703643525124	0.0215657576397195	0.232263814160133	0.00182357166639023	0.00366240870032524	0.241873076864026	0.0728053007085856	1	0.418729033825569
531	NEW YORK POST	The New York Post	Newspaper	All Editions	NA	April 15, 2007	2007	4	136	9 HOTTEST CELEBS ON THE WEB TURNING DIGITAL LI	1	0	1	1	1	TRUE	major_paper	NYPOST.COM	0.2497	0.0612139529826229	0.0894663037987223	0.0087225997073333	0.0263028106209328	0.0548107753870222	0.132371649192973	0.62476302070694	0.00234888760345423	7	0.62476302070694
532	NEW YORK POST	The New York Post	Newspaper	All Editions	NA	February 17, 2013	2013	2	62	First they were Reaganphones. Then they were Bub	1	0	1	1	1	TRUE	major_paper	NYPOST.COM	0.2497	0.080298720039532	0.174933197925443	0.287969044150351	0.144133537376961	0.0359486332716318	0.0254709602570526	0.169869219999133	0.0813766869798952	3	0.287969044150351
533	NEW YORK POST	The New York Post	Newspaper	All Editions	NA	March 9, 2013	2013	3	63	'Ninety percent of teen births in the city are p	1	0	1	1	1	TRUE	major_paper	NYPOST.COM	0.2497	0.148890683618838	0.199872158333453	0.366373805421834	0.0237111495938139	0.00858444734139014	0.0322316353518774	0.169948044200147	0.0503880761386458	3	0.366373805421834
534	NEW YORK POST	The New York Post	Newspaper	All Editions	NA	March 27, 2013	2013	3	63	On THE day he announced that he's running for ma	1	0	1	1	1	TRUE	major_paper	NYPOST.COM	0.2497	0.380494788505966	0.210432282330552	0.013958819238251	0.141402123010855	0.0503473843110919	0.0335886250291024	0.138992770894497	0.0307832066796851	1	0.380494788505966
535	NEW YORK POST	The New York Post	Newspaper	All Editions	NA	January 26, 2014	2014	1	49	Reader Mike Misczuk can't wait for the liberal bu	1	0	1	1	1	TRUE	major_paper	NYPOST.COM	0.2497	0.154320169653513	0.0799654054047782	0.0130688241696581	0.0470504050260289	0.114379937589261	0.0389437918975573	0.535259873505231	0.0170115927539728	7	0.535259873505231
536	NEW YORK POST	The New York Post	Newspaper	All Editions	NA	April 16, 2016	2016	4	28	The City Council could vote as early as Wednesda	1	0	1	1	1	TRUE	major_paper	NYPOST.COM	0.2497	0.074784977683708	0.464251506102601	0.0266064956531822	0.0331794119298139	0.0508946636674043	0.00739479219364552	0.0818872359407292	0.261000916828916	2	0.464251506102601
537	NEW YORK POST	The New York Post	Newspaper	All Editions	NA	March 26, 2017	2017	3	15	Wasn't it the Democrats who were supposed to be	1	0	1	1	1	TRUE	major_paper	NYPOST.COM	0.2497	0.446650636445147	0.0423215847877547	0.00542777540408554	0.025992245155913	0.00952547292038675	0.00284052732180644	0.330345503385351	0.136896254579556	1	0.446650636445147
538	NEW YORK POST	The New York Post	Newspaper	Late City Final	NA	February 12, 2009	2009	2	110	WASHINGTON - Lawmakers reached a deal last night	1	0	1	1	1	TRUE	major_paper	NYPOST.COM	0.2497	0.0444113720715857	0.0286141802122694	0.0421938553221804	0.199763450012106	0.00300883153637494	0.00341873299594445	0.0766377100522426	0.601951867797297	8	0.601951867797297
539	NEW YORK POST	The New York Post	Newspaper		NA	August 8, 2009	2009	8	116	ALBANY - Gov. Paterson plans to dole out $175 mi	1	0	1	1	1	TRUE	major_paper	NYPOST.COM	0.2497	0.0232402784158764	0.252603328316111	0.4402593972674	0.058630865575531	0.0104589391719159	0.0160013993758403	0.0724042034618625	0.126401588415463	3	0.4402593972674
540	NEW YORK POST	The New York Post	Newspaper	Sports+Late City Final	NA	September 10, 2014	2014	9	57	A Queens garbage man impersonated his dead twin	1	0	1	1	1	TRUE	major_paper	NYPOST.COM	0.2497	0.0203510821747095	0.331393692561156	0.042135656592838	0.0433997593518649	0.188048344110067	0.19367998736831	0.174552981109729	0.00643849673132502	2	0.331393692561156
541	NEW YORK POST	The New York Post	Newspaper	All Editions	NA	May 8, 2011	2011	5	89	At first glance, New York's job numbers look pro	1	1	1	1	1	TRUE	major_paper	NYPOST.COM	0.2497	0.00600859885844075	0.216747603754345	0.256996813616108	0.467341529843136	0.00431284862947749	0.00814181900207559	0.020921347079064	0.0195294392173532	4	0.467341529843136
542	NEW YORK POST	The New York Post	Newspaper	All Editions	NA	July 12, 2012	2012	7	79	The Issue: The escalating enrollment and costs t	1	0	1	1	1	TRUE	major_paper	NYPOST.COM	0.2497	0.205918069252995	0.110497746605648	0.271616250588101	0.235801789807977	0.00792555260772347	0.0237356255150914	0.0778688782552526	0.0666360873672122	3	0.271616250588101
543	NEW YORK POST	The New York Post	Newspaper		NA	July 19, 2009	2009	7	115	A jeweler to the stars is one of the city's wors	1	0	1	1	1	TRUE	major_paper	NYPOST.COM	0.2497	0.0075779719748722	0.312383528487043	0.0181469861205485	0.0171388408852143	0.188658672368831	0.240599370312756	0.21322152801044	0.00227310184029547	2	0.312383528487043
544	NEW YORK POST	The New York Post	Newspaper	All Editions	NA	September 16, 2016	2016	9	33	SANDRA Lee has signed a deal with Sony Pictures	1	0	1	1	1	TRUE	major_paper	NYPOST.COM	0.2497	0.0218941855655922	0.18978943347462	0.00794429501221634	0.0146569401332348	0.138641316760087	0.11888866462431	0.50555924609189	0.00262591833804914	7	0.50555924609189
545	NEW YORK POST	The New York Post	Newspaper	All Editions	NA	May 25, 2016	2016	5	29	It's official: Millennials really are the Mom's	1	0	1	1	1	TRUE	major_paper	NYPOST.COM	0.2497	0.00933392607637907	0.0114206677786822	0.0165131006774793	0.529224392462849	0.0034063264413004	0.0432728071465657	0.38362735240998	0.00320142700676481	4	0.529224392462849
546	NEW YORK POST	The New York Post	NA	Sports	NA	November 22, 1998	1998	11	251	"I admit it, I feel guilty about how much money	1	0	1	1	1	TRUE	major_paper	NYPOST.COM	0.2497	0.0185691995935597	0.0283401393096184	0.00975645857528547	0.0388911394592511	0.0596842786954391	0.146695377486659	0.694961519159001	0.00310188772118632	7	0.694961519159001
547	NEW YORK POST	The New York Post	Newspaper	Sports+Late City Final	NA	January 22, 2012	2012	1	73	COLUMBIA, S.C. - Newt Gingrich scored a stunning	0	0	0	1	1	TRUE	major_paper	NYPOST.COM	0.2497	0.709762640349151	0.0157789012738124	0.00243057290707413	0.0554260671858882	0.129690600900933	0.00468030323481373	0.0734228836071408	0.00880803054118663	1	0.709762640349151
548	NEW YORK POST	The New York Post	Newspaper	All Editions	NA	May 5, 2014	2014	5	53	The Issue: Whether ObamaCare can be fixed, or sh	1	0	1	1	1	TRUE	major_paper	NYPOST.COM	0.2497	0.351822535555582	0.13402758924741	0.12765044512021	0.0589979527035571	0.00770152694643024	0.00898428821836488	0.193585998591037	0.117229663617409	1	0.351822535555582
549	NEW YORK POST	The New York Post	Newspaper	Sports+Late City Final	NA	May 24, 2017	2017	5	17	The Trump administration on Tuesday unveiled a $	1	0	1	1	1	TRUE	major_paper	NYPOST.COM	0.2497	0.128551583329728	0.0195906825492997	0.104115577963646	0.0923159365000359	0.00314985863449461	0.00999507778982459	0.0587048839297874	0.583576399303185	8	0.583576399303185
550	NEW YORK POST	The New York Post	Newspaper	All Editions	NA	May 27, 2014	2014	5	53	Being minutes from the Tonys, Anika Noni Rose, n	1	0	1	1	1	TRUE	major_paper	NYPOST.COM	0.2497	0.0688693146412739	0.025027763673252	0.00516739796738017	0.019855261513433	0.106943234745881	0.176964859175206	0.593401049857025	0.00377111842654948	7	0.593401049857025
551	NEW YORK POST	The New York Post	Newspaper	All Editions	NA	March 13, 2012	2012	3	75	The Issue: Mixed messages from the Obama adminis	1	0	1	1	1	TRUE	major_paper	NYPOST.COM	0.2497	0.159940354543229	0.0357103874078101	0.00786581890299134	0.325345007114619	0.0381736662724348	0.00503937598596562	0.225811001942244	0.202114387830707	4	0.325345007114619
552	NEW YORK POST	The New York Post	Newspaper	All Editions	NA	April 20, 2015	2015	4	40	GWYNETH Paltrow - who recently ended her "food s	1	0	1	1	1	TRUE	major_paper	NYPOST.COM	0.2497	0.0129301522992907	0.168197197030353	0.00691551770841327	0.0116939890687712	0.251188690027938	0.172178050812535	0.375258578145969	0.00163782490673023	7	0.375258578145969
553	NEW YORK POST	The New York Post	Newspaper	Late City Final	NA	January 22, 2012	2012	1	73	' They treated me like I was a slave. ' Shanhel	1	0	1	1	1	TRUE	major_paper	NYPOST.COM	0.2497	0.00409891580376743	0.197941115230498	0.0182055090709796	0.0339968603255891	0.0622460117035868	0.375993731210264	0.305206428552164	0.0023114281031521	6	0.375993731210264
554	NEW YORK POST	The New York Post	NA		NA	January 13, 1998	1998	1	241	GEORGE Orwell, phone home. Food stamps are being	1	0	1	1	1	TRUE	major_paper	NYPOST.COM	0.2497	0.206257665681213	0.156503113321615	0.207180347318197	0.0234704555438381	0.0526695293299586	0.0352105725937519	0.310578247323395	0.0081300688880314	7	0.310578247323395
555	NEW YORK POST	The New York Post	Newspaper	Sports+Late City Final	NA	March 21, 2012	2012	3	75	WASHINGTON - House Republicans presented an elec	1	0	1	1	1	TRUE	major_paper	NYPOST.COM	0.2497	0.0706161922045805	0.00896601570960116	0.113700604476181	0.151704210433126	0.000551819269789052	0.00105430657837606	0.0225144210292985	0.630892430299048	8	0.630892430299048
556	NEW YORK POST	The New York Post	Newspaper	All Editions	NA	April 28, 2004	2004	4	172	SIX months after Sean "P. Diddy" Combs ran the N	1	0	1	1	1	TRUE	major_paper	NYPOST.COM	0.2497	0.0120608119910891	0.364041215977245	0.0402177061078584	0.0186968201385887	0.0297585494051652	0.229748574670599	0.293969489393631	0.0115068323158247	2	0.364041215977245
557	NEW YORK POST	The New York Post	NA	All Editions	NA	April 12, 2002	2002	4	196	A city worker ran a food stamps and benefits scam	1	0	1	1	1	TRUE	major_paper	NYPOST.COM	0.2497	0.0159927275400599	0.543898192197688	0.289986693662953	0.026581830702085	0.0312174429570171	0.0310617643950629	0.0424241873891022	0.0188371611560313	2	0.543898192197688
558	NEW YORK POST	The New York Post	Newspaper	Late City Final	NA	November 3, 2011	2011	11	95	'I agreed to go with him and on the walk to a pr	1	0	1	1	1	TRUE	major_paper	NYPOST.COM	0.2497	0.0203383988811761	0.231955199629139	0.0211188612083225	0.0165623733329301	0.103654305478329	0.123885896285924	0.479415327914372	0.00306963726980689	7	0.479415327914372
559	NEW YORK POST	The New York Post	Newspaper	All Editions	NA	April 16, 2015	2015	4	40	Gwyneth Paltrow got off food stamps, then prompt	1	0	1	1	1	TRUE	major_paper	NYPOST.COM	0.2497	0.0247124166351237	0.0886008004962974	0.00481222290872929	0.0126754093230699	0.21071887782486	0.0707369278115097	0.58481045012848	0.00293289487193024	7	0.58481045012848
560	NEW YORK POST	The New York Post	Newspaper	All Editions	NA	January 3, 2009	2009	1	109	Here's a troubling sign: Gov. Paterson seems int	1	0	1	1	1	TRUE	major_paper	NYPOST.COM	0.2497	0.0300209308417307	0.021521475533972	0.349282495992844	0.151937638705485	0.00194543422386447	0.0204296864965365	0.324216849529654	0.100645488675913	3	0.349282495992844
561	NEW YORK POST	The New York Post	NA	All Editions	NA	August 15, 2003	2003	8	188	In unanimously upholding the state's right to de	1	0	1	1	1	TRUE	major_paper	NYPOST.COM	0.2497	0.0247567782116776	0.227028111923289	0.60214507751559	0.024529731762911	0.00579441089022886	0.0266686603698009	0.0734966111394756	0.015580618187027	3	0.60214507751559
562	NEW YORK POST	The New York Post	Newspaper	All Editions	NA	February 20, 2009	2009	2	110	What is it about personal responsibility that so	1	0	1	1	1	TRUE	major_paper	NYPOST.COM	0.2497	0.0299639924595949	0.143631623458263	0.347991335661254	0.152469154498767	0.00616055503093505	0.0138660726116818	0.251747600569426	0.0541696657100787	3	0.347991335661254
563	NEW YORK POST	The New York Post	Newspaper	All Editions	NA	February 7, 2011	2011	2	86	A multimillionaire who lives a fairy-tale life i	1	0	1	1	1	TRUE	major_paper	NYPOST.COM	0.2497	0.00425964468329324	0.231865814937181	0.0318542365882941	0.0385873716342971	0.0695026190395628	0.478036705691074	0.144410819462183	0.00148278796411459	6	0.478036705691074
564	NEW YORK POST	The New York Post	Newspaper	All Editions	NA	November 29, 2017	2017	11	23	An employee of the city's welfare agency used in	1	0	1	1	1	TRUE	major_paper	NYPOST.COM	0.2497	0.0107162741387388	0.512466310883789	0.210322466143141	0.025928730427925	0.0920925521186158	0.0968100904888928	0.0433852218380417	0.00827835396085498	2	0.512466310883789
565	NEW YORK POST	The New York Post	Newspaper	All Editions	NA	August 30, 2009	2009	8	116	TODAY'S election in the African nation of Gabon	1	0	1	1	1	TRUE	major_paper	NYPOST.COM	0.2497	0.297302638626343	0.0338985791482392	0.0463447145768501	0.0390832965045699	0.0376178095740196	0.274723489826981	0.257237249294725	0.0137922224482714	1	0.297302638626343
566	NEW YORK POST	The New York Post	NA	All Editions	NA	February 27, 2002	2002	2	194	Mayor Bloomberg seems to have passed an early te	1	0	1	1	1	TRUE	major_paper	NYPOST.COM	0.2497	0.0354756546531923	0.284344156379307	0.387900882409158	0.0408224757261629	0.00785897812240066	0.0183901607666444	0.213030949071087	0.0121767428720469	3	0.387900882409158
567	NEW YORK POST	The New York Post	NA	All Editions	NA	October 23, 2002	2002	10	202	A Brooklyn landlord and party-planner with a who	1	0	1	1	1	TRUE	major_paper	NYPOST.COM	0.2497	0.0352416858977653	0.395149534154601	0.067422172121176	0.0152819398340565	0.143855959240932	0.202411066948306	0.134857878481681	0.0057797633214812	2	0.395149534154601
568	NEW YORK POST	The New York Post	Newspaper		NA	December 20, 2009	2009	12	120	The lone dissenter in the City Council's vote to	1	0	1	1	1	TRUE	major_paper	NYPOST.COM	0.2497	0.0321232220762173	0.205707351235338	0.0233562927500925	0.302055179888291	0.0452710947774406	0.10555230339231	0.174290056824301	0.111644499056009	4	0.302055179888291
569	NEW YORK POST	The New York Post	Newspaper	All Editions	NA	March 8, 2004	2004	3	171	All that's standing between New Yorkers and fewe	1	0	1	1	1	TRUE	major_paper	NYPOST.COM	0.2497	0.023435199262018	0.0411367408563824	0.206694671018347	0.415642768811295	0.00403377950396321	0.0760994306462763	0.13908150105486	0.0938759088468574	4	0.415642768811295
570	NEW YORK POST	The New York Post	Newspaper	All Editions	NA	October 13, 2012	2012	10	82	The Issue: President Obama's criticism of Mitt R	1	0	1	1	1	TRUE	major_paper	NYPOST.COM	0.2497	0.438791739397771	0.0182674082959177	0.0147662511806915	0.123079735155344	0.0192441154184084	0.0174035189394278	0.305844422782277	0.0626028088301619	1	0.438791739397771
571	NEW YORK POST	The New York Post	Newspaper	All Editions	NA	January 10, 2008	2008	1	121	MANHATTAN * A construction worker who stabbed a	1	0	1	1	1	TRUE	major_paper	NYPOST.COM	0.2497	0.00598804202275628	0.257836611627432	0.00245849636819319	0.00264492213152428	0.545351691769208	0.123377925772638	0.0616378643646204	0.00070444594362755	5	0.545351691769208
572	NEW YORK POST	The New York Post	Newspaper	All Editions	NA	November 27, 2006	2006	11	155	The front window is cracked. The paint is peelin	1	0	1	1	1	TRUE	major_paper	NYPOST.COM	0.2497	0.00769284659692681	0.0613495880803006	0.0398728101518355	0.0974302858324846	0.0214464912391429	0.456093544103218	0.312606735478806	0.00350769851728547	6	0.456093544103218
573	NEW YORK POST	The New York Post	Newspaper	All Editions	NA	November 9, 2012	2012	11	83	The Issue: Mitt Romney's loss in Tuesday's presi	1	0	1	1	1	TRUE	major_paper	NYPOST.COM	0.2497	0.597932266235931	0.0191812188201149	0.0160527090381518	0.116777565949484	0.00969780309084067	0.00706033062980559	0.20105693131858	0.0322411749170928	1	0.597932266235931
574	NEW YORK POST	The New York Post	Newspaper	All Editions	NA	January 30, 2009	2009	1	109	IT certainly wasn't what they had planned. Life	1	0	1	1	1	TRUE	major_paper	NYPOST.COM	0.2497	0.0324470831267764	0.0249207738134155	0.0174296572366706	0.124023864266198	0.0188575165816118	0.219515407861141	0.557925126682904	0.00488057043128257	7	0.557925126682904
575	NEW YORK POST	The New York Post	Newspaper	All Editions	NA	May 31, 2012	2012	5	77	The Issue: Whether New York City should be able	1	0	1	1	1	TRUE	major_paper	NYPOST.COM	0.2497	0.0762500469353804	0.315275121355028	0.239086370863059	0.0265798336221046	0.0285584038851875	0.0908959153700026	0.197677426807775	0.0256768811614627	2	0.315275121355028
576	NEW YORK POST	The New York Post	Newspaper	All Editions	NA	April 29, 2013	2013	4	64	Ben Affleck has a lot to atone for. For the nex	1	0	1	1	1	TRUE	major_paper	NYPOST.COM	0.2497	0.101425310750691	0.0784286471954598	0.182809459448426	0.0322915583035487	0.0794512467161955	0.0967201140777459	0.417807844188302	0.0110658193196306	7	0.417807844188302
577	NEW YORK POST	The New York Post	Newspaper	Sports+Late City Final	NA	April 16, 2013	2013	4	64	A sweeping new immigration deal coming out this	1	0	1	1	1	TRUE	major_paper	NYPOST.COM	0.2497	0.0303924805303079	0.542294935120019	0.0812392526990016	0.0247529207578117	0.0174831395192434	0.0133154810219529	0.0286220829502696	0.261899707401394	2	0.542294935120019
578	NEW YORK POST	The New York Post	Newspaper	All Editions	NA	March 3, 2017	2017	3	15	Rachel Dolezal became a Washington state NAACP c	1	0	1	1	1	TRUE	major_paper	NYPOST.COM	0.2497	0.185985526145146	0.0406974347504864	0.0236021084898203	0.0816113506001637	0.0216925279684346	0.106578981847498	0.530683037279771	0.00914903291868004	7	0.530683037279771
579	NEW YORK POST	The New York Post	NA	Late City Final	NA	February 11, 2002	2002	2	194	Believing they've now got a friend in City Hall,	1	0	1	1	1	TRUE	major_paper	NYPOST.COM	0.2497	0.0498781343741011	0.406918512828139	0.0990364581365368	0.0481124045714588	0.0307150166737034	0.09754095836444	0.136638744138392	0.131159770913229	2	0.406918512828139
580	NEW YORK POST	The New York Post	Newspaper	All Editions	NA	August 23, 2016	2016	8	32	Twenty years ago this week, President Bill Clint	1	0	1	1	1	TRUE	major_paper	NYPOST.COM	0.2497	0.125244975192097	0.0168923263410289	0.391841286862856	0.318455713966684	0.00157103219779295	0.0131062343953311	0.0900581118095408	0.042830319234669	3	0.391841286862856
581	NEW YORK POST	The New York Post	Newspaper	All Editions	NA	August 30, 2009	2009	8	116	If the Kennedy Era in American politics is over	1	0	1	1	1	TRUE	major_paper	NYPOST.COM	0.2497	0.50692261587843	0.0330061512633536	0.00711806367800466	0.0546460303570818	0.0333463353721682	0.0261529435651096	0.259815624966642	0.0789922349192105	1	0.50692261587843
582	NEW YORK POST	The New York Post	Newspaper	All Editions	NA	January 14, 2007	2007	1	133	A recent City Hall press release pulled the curt	1	0	1	1	1	TRUE	major_paper	NYPOST.COM	0.2497	0.0136928934711053	0.239351185489778	0.197275839976973	0.189700349308003	0.0096383859970012	0.0663144277264066	0.187338321106478	0.096688596924255	2	0.239351185489778
583	NEW YORK POST	The New York Post	Newspaper	All Editions	NA	September 4, 2016	2016	9	33	Dear John: I am a loyal reader of your column, a	1	0	1	1	1	TRUE	major_paper	NYPOST.COM	0.2497	0.0318633881773343	0.132705411173192	0.0236934896611879	0.182338181725747	0.0166174443928001	0.268824047474169	0.336741743672335	0.00721629372323313	7	0.336741743672335
584	NEW YORK POST	The New York Post	Newspaper	Sports+Late City Final	NA	January 17, 2012	2012	1	73	'Do you believe people who are felons . . . shou	1	0	1	1	1	TRUE	major_paper	NYPOST.COM	0.2497	0.59649134299554	0.012929283954065	0.00812654657904357	0.0610654562176426	0.00789476190998325	0.00634880142363685	0.294081029272598	0.0130627776474915	1	0.59649134299554
585	NEW YORK POST	The New York Post	Newspaper	All Editions	NA	August 18, 2015	2015	8	44	Illeana Douglas' memoir, out Nov. 3, is called "	1	0	1	1	1	TRUE	major_paper	NYPOST.COM	0.2497	0.0763331684549731	0.0513633516266653	0.00452077754627136	0.0122308975880061	0.149977996715112	0.0884752634482532	0.606598264508463	0.0105002801122557	7	0.606598264508463
586	NEW YORK POST	The New York Post	Newspaper	All Editions	NA	August 20, 2011	2011	8	92	Mayor Bloomberg's having a hard time swallowing	1	0	1	1	1	TRUE	major_paper	NYPOST.COM	0.2497	0.0326629277670723	0.357243746671566	0.155195363399371	0.0358805488607324	0.0135421352581605	0.0405040075126475	0.302795683403972	0.0621755871264784	2	0.357243746671566
587	NEW YORK POST	The New York Post	NA		NA	August 5, 2001	2001	8	212	The murder of a Bronx baby in taxpayer-funded ho	1	0	1	1	1	TRUE	major_paper	NYPOST.COM	0.2497	0.00306309322812099	0.263267452988605	0.0321991553458562	0.017893182810054	0.0957950209599667	0.461131226304247	0.125527889026199	0.00112297933695156	6	0.461131226304247
588	NEW YORK POST	The New York Post	Newspaper	All Editions	NA	March 15, 2013	2013	3	63	The number of New York City residents receiving f	1	0	1	1	1	TRUE	major_paper	NYPOST.COM	0.2497	0.0198569050466034	0.462598294063737	0.146989464704436	0.211181974410219	0.0110815703249977	0.007225927069092	0.0285691612237437	0.112496703157171	2	0.462598294063737
589	NEW YORK POST	The New York Post	Newspaper	All Editions	NA	June 8, 2008	2008	6	126	This is who Billy Wagner lived with growing up:	1	0	1	1	1	TRUE	major_paper	NYPOST.COM	0.2497	0.00956247869720727	0.0101826176360096	0.0298656406408494	0.0452377459927141	0.014997239221102	0.182950733868085	0.705532878068485	0.00167066587554782	7	0.705532878068485
590	NEW YORK POST	The New York Post	NA	All Editions	NA	October 29, 2001	2001	10	214	Phyllis and Sidney Margolis get calls every day,	1	0	1	1	1	TRUE	major_paper	NYPOST.COM	0.2497	0.0107826425552278	0.225039127883003	0.0599755777138615	0.0397340582529478	0.0175959737141286	0.141813699759566	0.500826863117013	0.00423205700425218	7	0.500826863117013
591	NEW YORK POST	The New York Post	Newspaper	All Editions	NA	August 15, 2010	2010	8	104	OF THIS season's crazy, contentious, wide-open	1	0	1	1	1	TRUE	major_paper	NYPOST.COM	0.2497	0.360170579859434	0.0713406897915848	0.0120150583811652	0.0210739827902041	0.059182331878355	0.0591931653480949	0.360001872473299	0.0570223194778625	1	0.360170579859434
592	NEW YORK POST	The New York Post	Newspaper	All Editions	NA	January 15, 2007	2007	1	133	"Gotham's Latest Non-Crisis," (Editorial, Dec. 3	1	0	1	1	1	TRUE	major_paper	NYPOST.COM	0.2497	0.018308627106168	0.0638525260165008	0.173610904148	0.384000970090441	0.0157684176136992	0.166803809331824	0.157583487346895	0.0200712583464718	4	0.384000970090441
593	NEW YORK POST	The New York Post	Newspaper	Metro	NA	June 10, 2012	2012	6	78	In 2004, I was an actress/waitress living in New	1	0	1	1	1	TRUE	major_paper	NYPOST.COM	0.2497	0.00684326917899854	0.101657735747179	0.0553505960162626	0.153644124540566	0.0202032704226065	0.387700207647483	0.260122561959941	0.0144782344869642	6	0.387700207647483
594	NEW YORK POST	The New York Post	Newspaper	All Editions	NA	June 2, 2014	2014	6	54	'To me . . . she is a slut in the pure meaning o	1	0	1	1	1	TRUE	major_paper	NYPOST.COM	0.2497	0.264224459721888	0.151185643638269	0.19197711699433	0.0177061595888917	0.0186775781986476	0.0682614493738052	0.196570659242687	0.0913969332414817	1	0.264224459721888
595	NEW YORK POST	The New York Post	Newspaper	All Editions	NA	March 10, 2013	2013	3	63	It really is an Age of Wonder, as in: I wonder w	1	0	1	1	1	TRUE	major_paper	NYPOST.COM	0.2497	0.174165861095814	0.108837239451227	0.29765723057389	0.0739419515737829	0.00901863417987526	0.0362845627641589	0.273832540139536	0.0262619802217163	3	0.29765723057389
596	NEW YORK POST	The New York Post	Newspaper	Sports+Late City Final	NA	May 29, 2012	2012	5	77	Westchester County District Attorney Janet DiFio	1	0	1	1	1	TRUE	major_paper	NYPOST.COM	0.2497	0.0610237853630538	0.45750115329906	0.212489178740495	0.0490178500755647	0.0367261531886194	0.0979774173410125	0.0715767898265562	0.0136876721656384	2	0.45750115329906
597	NEW YORK POST	The New York Post	Newspaper	Late City Final	NA	October 3, 2012	2012	10	82	WASHINGTON - The gloves are coming off tonight w	1	0	1	1	1	TRUE	major_paper	NYPOST.COM	0.2497	0.493387858858664	0.0191178913031999	0.00554255076062901	0.17002100845118	0.0844831889115492	0.00380537611699167	0.114665003897047	0.108977121700739	1	0.493387858858664
598	NEW YORK POST	The New York Post	Newspaper	All Editions	NA	May 24, 2017	2017	5	17	Relax: President Trump's new budget won't leave	1	0	1	1	1	TRUE	major_paper	NYPOST.COM	0.2497	0.0971876742007171	0.0248604652611465	0.148040786556794	0.173503211035398	0.00329330041640701	0.033376470918663	0.233804182622343	0.285933908988531	8	0.285933908988531
599	NEW YORK POST	The New York Post	Newspaper	Sports+Late City Final	NA	January 28, 2009	2009	1	109	WASHINGTON - President Obama's nearly $1 trillio	1	0	1	1	1	TRUE	major_paper	NYPOST.COM	0.2497	0.135005381254664	0.0435923393898459	0.0377820080505212	0.140863626255008	0.00286437728539407	0.00137327553252577	0.0393325364273382	0.599186455804703	8	0.599186455804703
600	NEW YORK POST	The New York Post	Newspaper	All Editions	NA	September 7, 2012	2012	9	81	The Issue: America's record debt, which reached	1	0	1	1	1	TRUE	major_paper	NYPOST.COM	0.2497	0.265781742158115	0.0439259276963683	0.0127206822923666	0.184575620610899	0.0103026077174912	0.00714691641373986	0.162641389747084	0.312905113363935	8	0.312905113363935
601	NEW YORK POST	The New York Post	NA	News	NA	June 19, 1998	1998	6	246	SEN. Alfonse D'Amato did an amazing thing two we	1	0	1	1	1	TRUE	major_paper	NYPOST.COM	0.2497	0.576663963354099	0.134280023128152	0.0420567277287848	0.0120645524674671	0.0120351291227003	0.00432117751091803	0.0957605628687485	0.12281786381913	1	0.576663963354099
602	NEW YORK POST	The New York Post	Newspaper	Sports+Late City Final	NA	February 12, 2009	2009	2	110	Octomom became an Internet panhandler yesterday	1	0	1	1	1	TRUE	major_paper	NYPOST.COM	0.2497	0.0123454868809864	0.356143116188858	0.135362624952667	0.0481309132479985	0.0210850291249045	0.294812901136413	0.126107155579909	0.00601277288826344	2	0.356143116188858
603	NEW YORK POST	The New York Post	Newspaper	All Editions	NA	March 1, 2009	2009	3	111	Health scare "The Cowardly Bully" (Editorial, F	1	0	1	1	1	TRUE	major_paper	NYPOST.COM	0.2497	0.0805941664606843	0.191970887881515	0.221301190154599	0.255433592592546	0.0162394063223142	0.0781720830768046	0.0402000123549771	0.116088661156559	4	0.255433592592546
604	NEW YORK POST	The New York Post	NA	All Editions	NA	December 8, 1999	1999	12	240	WASHINGTON -- Surging Republican presidential ca	1	0	1	1	1	TRUE	major_paper	NYPOST.COM	0.2497	0.430187518160259	0.095194976458565	0.0172359885714795	0.0639861200757627	0.0715179478853643	0.00486568853677583	0.0572900377027626	0.259721722609031	1	0.430187518160259
605	NEW YORK POST	The New York Post	NA	All Editions	NA	October 11, 2002	2002	10	202	New York's Bravest said "no" to the city's pay-r	1	0	1	1	1	TRUE	major_paper	NYPOST.COM	0.2497	0.0256060041370866	0.351484582771964	0.0234682340674156	0.203182338008826	0.120448227839254	0.0101616865476707	0.0551909898264088	0.210457936801374	2	0.351484582771964
606	NEW YORK POST	The New York Post	Newspaper	All Editions	NA	September 21, 2012	2012	9	81	The Issue: Romney's comment that he'll be unpopu	1	0	1	1	1	TRUE	major_paper	NYPOST.COM	0.2497	0.340769796609328	0.0186190459812924	0.0760000888282793	0.204206369644155	0.0455141264211318	0.0438895138052549	0.230934172479809	0.0400668862307499	1	0.340769796609328
607	NEW YORK POST	The New York Post	Newspaper	All Editions	NA	June 24, 2004	2004	6	174	The ex-manager of the hard-rock band Kiss was ex	1	0	1	1	1	TRUE	major_paper	NYPOST.COM	0.2497	0.0104869426051369	0.365512361675373	0.0223216412630519	0.0195462783427541	0.106516985294382	0.227450065424511	0.245657553141464	0.00250817225332664	2	0.365512361675373
608	NEW YORK POST	The New York Post	Newspaper	All Editions	NA	July 19, 2004	2004	7	175	Crass, parochial politics this year has produced	1	0	1	1	1	TRUE	major_paper	NYPOST.COM	0.2497	0.154933031215578	0.117709101782399	0.0879588279554282	0.432228327112605	0.00695734713464066	0.00942751723422796	0.106835175959902	0.0839506716052178	4	0.432228327112605
609	NEW YORK POST	The New York Post	Newspaper	All Editions	NA	February 26, 2012	2012	2	74	BROOKLYN An East New York car accident left a w	1	0	1	1	1	TRUE	major_paper	NYPOST.COM	0.2497	0.00151614178480257	0.190315981958526	0.0037592344003474	0.0028489948100477	0.524743693723952	0.244894818774993	0.0316486846017978	0.000272449945532878	5	0.524743693723952
610	NEW YORK POST	The New York Post	Newspaper	Sports+Late City Final	NA	February 27, 2017	2017	2	14	President Trump's proposed budget will reportedl	1	0	1	1	1	TRUE	major_paper	NYPOST.COM	0.2497	0.221495827878765	0.0509616824542901	0.0137468949286657	0.113613874572858	0.00507593364330444	0.00223031244180446	0.0989878725193571	0.493887601560955	8	0.493887601560955
611	NEW YORK POST	The New York Post	Newspaper	All Editions	NA	February 21, 2009	2009	2	110	WASHINGTON - Bill Clinton yesterday had some adv	1	0	1	1	1	TRUE	major_paper	NYPOST.COM	0.2497	0.388738517076058	0.0145307877451791	0.0108801471861413	0.0825364925853411	0.00270759439604477	0.0039054014239425	0.383437211902402	0.113263847684892	1	0.388738517076058
612	NEW YORK POST	The New York Post	Newspaper	Metro+Sports Extra	NA	July 24, 2016	2016	7	31	Muhammad Ali Jr., the estranged son of late boxi	1	0	1	1	1	TRUE	major_paper	NYPOST.COM	0.2497	0.0100503236603136	0.104300686180173	0.0245991077007656	0.0953494777574865	0.0899942202232365	0.459817167325511	0.21333528887317	0.00255372827934454	6	0.459817167325511
613	NEW YORK POST	The New York Post	Newspaper	All Editions	NA	April 19, 2006	2006	4	148	Mayor Bloomberg offered New Yorkers a mini-profi	1	0	1	1	1	TRUE	major_paper	NYPOST.COM	0.2497	0.0968382316349462	0.301202428200907	0.250618848316302	0.0299108183042944	0.0113784482520572	0.0184960434631309	0.281682037938337	0.00987314389002533	2	0.301202428200907
614	NEW YORK POST	The New York Post	Newspaper	All Editions	NA	July 15, 2008	2008	7	127	Nearly one of every four New Yorkers lives in po	1	0	1	1	1	TRUE	major_paper	NYPOST.COM	0.2497	0.0128178963765436	0.162548561395763	0.106020586543755	0.33753208112507	0.0121290556506685	0.103751443414611	0.236165848654766	0.0290345268388216	4	0.33753208112507
615	NEW YORK POST	The New York Post	NA	All Editions	NA	December 19, 1997	1997	12	264	Do you know him? His picture hung this week in T	1	0	1	1	1	TRUE	major_paper	NYPOST.COM	0.2497	0.0427997366091312	0.0501644207116597	0.00429567308722183	0.0138731977552452	0.0739857124991345	0.0332870704729273	0.778375104255511	0.00321908460916977	7	0.778375104255511
616	NEW YORK POST	The New York Post	Newspaper	All Editions	NA	April 17, 2015	2015	4	40	GWYNETH Paltrow admitted Thursday she failed her	1	0	1	1	1	TRUE	major_paper	NYPOST.COM	0.2497	0.107466253115892	0.145413303306007	0.0425067690852915	0.0655376042052759	0.0381090565834887	0.0464641810001868	0.523237834263047	0.0312649984408106	7	0.523237834263047
617	NEW YORK POST	The New York Post	Newspaper	All Editions	NA	February 1, 2009	2009	2	110	With passage of the "American Recovery and Reinv	1	0	1	1	1	TRUE	major_paper	NYPOST.COM	0.2497	0.0299343123634074	0.123114037400927	0.0464606607384392	0.0981290523978367	0.0489518066081117	0.00348729302894207	0.0243624383938809	0.625560399068455	8	0.625560399068455
618	NEW YORK POST	The New York Post	Newspaper	All Editions	NA	July 30, 2004	2004	7	175	Gov. Pataki yesterday correctly took his veto pe	1	0	1	1	1	TRUE	major_paper	NYPOST.COM	0.2497	0.102387402796419	0.056995566845092	0.152819235393321	0.401397995307349	0.00940467174628328	0.0885463376329538	0.12078752337238	0.067661266906202	4	0.401397995307349
619	NEW YORK POST	The New York Post	Newspaper	All Editions	NA	January 22, 2017	2017	1	13	Baseball bummer Jorge Posada may not be a first	1	0	1	1	1	TRUE	major_paper	NYPOST.COM	0.2497	0.281537367422308	0.0376900545481591	0.0802165922093164	0.0848060184075591	0.0689533616986202	0.0727994584375599	0.353825885346711	0.0201712619297659	7	0.353825885346711
620	NEW YORK POST	The New York Post	Newspaper	Sports+Late City Final	NA	May 23, 2017	2017	5	17	The Trump administration wants to impose a work	1	1	1	1	1	TRUE	major_paper	NYPOST.COM	0.2497	0.0684544712665326	0.01793887556618	0.286104517348488	0.175059187584324	0.00107176061974694	0.00397216001946474	0.0624357773225604	0.384963250272703	8	0.384963250272703
621	NEW YORK POST	The New York Post	NA	All Editions	NA	January 22, 1999	1999	1	229	Ever since President Clinton announced the "end	1	0	1	1	1	TRUE	major_paper	NYPOST.COM	0.2497	0.0977186011466836	0.514961787386924	0.280535075155062	0.00806104496531982	0.00849776694753381	0.00842729574826916	0.0483789146659387	0.0334195139842689	2	0.514961787386924
622	NEW YORK POST	The New York Post	NA	All Editions	NA	February 27, 2002	2002	2	194	WASHINGTON - President Bush yesterday called for	1	0	1	1	1	TRUE	major_paper	NYPOST.COM	0.2497	0.122272389795797	0.0827978109440626	0.522911599379527	0.171493140486728	0.00249753599981268	0.00546408720734168	0.0245631449271	0.0680002912596309	3	0.522911599379527
623	NEW YORK POST	The New York Post	NA	All Editions	NA	January 30, 2000	2000	1	217	Hundreds of seriously ill AIDS patients who rely	1	0	1	1	1	TRUE	major_paper	NYPOST.COM	0.2497	0.00287840096154576	0.248690579374832	0.0200647410488064	0.00781344141902097	0.0222563755564876	0.511391311155703	0.18599331266686	0.000911837816745385	6	0.511391311155703
624	NEW YORK POST	The New York Post	Newspaper	Metro	NA	January 22, 2012	2012	1	73	COLUMBIA, S.C. - Newt Gingrich scored a stunning	1	0	1	1	1	TRUE	major_paper	NYPOST.COM	0.2497	0.769455587927669	0.0420736904460633	0.001602995843185	0.00629404774356093	0.147584783795183	0.00250850250901505	0.0251078638298033	0.00537252790552022	1	0.769455587927669
625	NEW YORK POST	The New York Post	Newspaper	Late City Final	NA	July 24, 2016	2016	7	31	Muhammad Ali Jr., the estranged son of late boxi	1	0	1	1	1	TRUE	major_paper	NYPOST.COM	0.2497	0.00900828128050053	0.111350825256235	0.0241803544665579	0.0928350925009109	0.0582913368434227	0.454383910654619	0.247485344043339	0.00246485495441486	6	0.454383910654619
626	NEW YORK POST	The New York Post	Newspaper	All Editions	NA	August 16, 2012	2012	8	80	The Issue: Whether the US can remain economicall	1	0	1	1	1	TRUE	major_paper	NYPOST.COM	0.2497	0.260660481127305	0.0335243934378295	0.0808289284358503	0.24286675785469	0.027400829737906	0.0101729425371507	0.146518516975312	0.198027149893956	1	0.260660481127305
627	NEW YORK POST	The New York Post	Newspaper	Sports+Late City Final	NA	August 6, 2012	2012	8	80	Gabby Douglas' Olympic medal could be a golden o	1	0	1	1	1	TRUE	major_paper	NYPOST.COM	0.2497	0.0269832687492068	0.24248464088867	0.0182507557236815	0.123164948249815	0.124459311715585	0.217256869538126	0.234093749757051	0.0133064553778655	2	0.24248464088867
628	NEW YORK POST	The New York Post	NA	All Editions	NA	May 6, 2001	2001	5	209	THE first job was refilling soda and candy vendi	1	0	1	1	1	TRUE	major_paper	NYPOST.COM	0.2497	0.00866632003278767	0.254567710040256	0.0228264807046562	0.0442075674024065	0.0852904633358985	0.18778142000085	0.393023405822126	0.00363663266101811	7	0.393023405822126
629	NEW YORK POST	The New York Post	Newspaper	All Editions	NA	September 5, 2012	2012	9	81	WASHINGTON - In yet another economic milestone f	1	0	1	1	1	TRUE	major_paper	NYPOST.COM	0.2497	0.324141034295468	0.0582120233028867	0.103736919121797	0.128501289990004	0.0064913610115014	0.00815564603225543	0.115830281773035	0.254931444473053	1	0.324141034295468
630	NEW YORK POST	The New York Post	Newspaper	All Editions	NA	January 5, 2012	2012	1	73	Gov. Cuomo laid an imposing pile of words on the	1	0	1	1	1	TRUE	major_paper	NYPOST.COM	0.2497	0.27164816256675	0.151898828141165	0.0923285117538247	0.0348211682418261	0.0219878609170503	0.0267577359401971	0.235104811035383	0.165452921403803	1	0.27164816256675
631	NEW YORK POST	The New York Post	NA	All Editions	NA	January 9, 2002	2002	1	193	The landmark education bill signed by President	1	0	1	1	1	TRUE	major_paper	NYPOST.COM	0.2497	0.0817438394840499	0.147611452542096	0.275935156741636	0.048953554243914	0.0094807228289341	0.0755190431258863	0.270373540171395	0.0903826908620887	3	0.275935156741636
632	NEW YORK POST	The New York Post	NA	Sport+Late City Final	NA	August 10, 1999	1999	8	236	Two carjackers were captured yesterday after the	1	0	1	1	1	TRUE	major_paper	NYPOST.COM	0.2497	0.00494137275025403	0.102880867271999	0.0033601539357331	0.00324152939725462	0.620279237598174	0.130376803123956	0.134281572464786	0.00063846345784315	5	0.620279237598174
633	NEW YORK POST	The New York Post	NA	Late City Final	NA	December 21, 2001	2001	12	216	A state employee in charge of helping troubled k	1	0	1	1	1	TRUE	major_paper	NYPOST.COM	0.2497	0.00813402696879957	0.188532922190499	0.42571910613082	0.0208496165505555	0.104377726160908	0.149735436261913	0.0965212998475228	0.00612986588898259	3	0.42571910613082
634	NEW YORK POST	The New York Post	Newspaper	All Editions	NA	July 14, 2015	2015	7	43	Civilization knows Penn & Teller are at B'way's	1	0	1	1	1	TRUE	major_paper	NYPOST.COM	0.2497	0.106846118290207	0.0327847042107161	0.00846611857836391	0.00629907921791346	0.166984606993665	0.16406672847165	0.511975392188119	0.00257725204936549	7	0.511975392188119
635	NEW YORK POST	The New York Post	Newspaper	Late City Final	NA	October 4, 2012	2012	10	82	The big question going into last night's debate	1	0	1	1	1	TRUE	major_paper	NYPOST.COM	0.2497	0.550716435938417	0.0130430066804057	0.00764989546830885	0.0744974550022425	0.00760154078815907	0.00699356919571001	0.292185005817595	0.0473130911091617	1	0.550716435938417
636	NEW YORK POST	The New York Post	Newspaper	All Editions	NA	February 21, 2013	2013	2	62	The Issue: President Obama's call for a raise in	1	0	1	1	1	TRUE	major_paper	NYPOST.COM	0.2497	0.0380814254212991	0.0129983146033118	0.0993972461723498	0.768438308731226	0.00888519780949554	0.00624880776534268	0.0343402559060833	0.0316104435908916	4	0.768438308731226
637	NEW YORK POST	The New York Post	Newspaper	Sports+Late City Final	NA	September 18, 2012	2012	9	81	'There are 47 percent who are with [Obama], who	1	0	1	1	1	TRUE	major_paper	NYPOST.COM	0.2497	0.578735872125296	0.0426014555950185	0.0682252435347755	0.171992873586668	0.00577429355369185	0.00791032910340445	0.0960405623939442	0.0287193701072023	1	0.578735872125296
638	NEW YORK POST	The New York Post	Newspaper	Sports+Late City Final	NA	August 11, 2016	2016	8	32	WASHINGTON - The rent's too damn high in New Yor	1	0	1	1	1	TRUE	major_paper	NYPOST.COM	0.2497	0.0299033119100991	0.24839284762121	0.162210565016275	0.224210648581019	0.0131385344998329	0.231057443409134	0.0781840683669366	0.0129025805954928	2	0.24839284762121
639	NEW YORK POST	The New York Post	NA	All Editions	NA	January 12, 2002	2002	1	193	She's baaaack! After a narrow loss to State Sen.	1	0	1	1	1	TRUE	major_paper	NYPOST.COM	0.2497	0.170771454550508	0.289566805527698	0.0551684165398887	0.0212673599831201	0.0384870853529529	0.0500980898832209	0.352010947619786	0.0226298405428248	7	0.352010947619786
640	NEW YORK POST	The New York Post	Newspaper	Sports+Late City Final	NA	December 30, 2006	2006	12	156	Food-pantry photo-ops are a holiday cliché for m	1	0	1	1	1	TRUE	major_paper	NYPOST.COM	0.2497	0.0256082889873683	0.257764183854298	0.218380512620261	0.159961895509115	0.00738904057451698	0.0340274037941054	0.289474742884303	0.00739393177603278	7	0.289474742884303
641	NEW YORK POST	The New York Post	Newspaper	All Editions	NA	April 28, 2011	2011	4	88	Hey, New York: You win the prize! So says USA T	1	0	1	1	1	TRUE	major_paper	NYPOST.COM	0.2497	0.0831703451832388	0.175113722948762	0.29432026665593	0.133767727446805	0.0475751301198865	0.0581960161379413	0.171822442677141	0.0360343488302946	3	0.29432026665593
642	NEW YORK POST	The New York Post	Newspaper	Sports+Late City Final	NA	July 22, 2005	2005	7	163	Mayor Bloomberg yesterday vetoed three measures	1	0	1	1	1	TRUE	major_paper	NYPOST.COM	0.2497	0.0152741902655351	0.514582385470975	0.281880950573209	0.0194783619787752	0.0123705113922388	0.0375429011576296	0.03216399036237	0.0867067087992673	2	0.514582385470975
643	NEW YORK POST	The New York Post	NA	All Editions	NA	June 27, 2002	2002	6	198	THEY'RE calling it the next Chelsea, the latest	1	0	1	1	1	TRUE	major_paper	NYPOST.COM	0.2497	0.00571367808529184	0.0632078474131528	0.00318198906367252	0.0102162194905071	0.262621196200774	0.0910855068161269	0.563021067489353	0.000952495441123022	7	0.563021067489353
644	NEW YORK POST	The New York Post	Newspaper	All Editions	NA	August 15, 2016	2016	8	32	She lost her job over a paper lab coat. A Brook	1	0	1	1	1	TRUE	major_paper	NYPOST.COM	0.2497	0.00542147469080576	0.349202553058059	0.0584706755690074	0.0305237997359164	0.0571018680290049	0.319916741221869	0.176694289375367	0.00266859831997159	2	0.349202553058059
645	NEW YORK POST	The New York Post	Newspaper	Sports+Late City Final	NA	May 6, 2016	2016	5	29	These women want to bag the city's new bag "tax.	1	0	1	1	1	TRUE	major_paper	NYPOST.COM	0.2497	0.0152952723294311	0.305716132848137	0.0144215136868165	0.022713552937858	0.0392349462744731	0.0733078697004054	0.334798161732387	0.194512550490492	7	0.334798161732387
646	NEW YORK POST	The New York Post	Newspaper	All Editions	NA	August 11, 2009	2009	8	116	RAISE your hand if you are sick of hearing about	1	0	1	1	1	TRUE	major_paper	NYPOST.COM	0.2497	0.0366760221963629	0.0765842543429461	0.00674356733474344	0.482610379467347	0.0421338883854517	0.00964051900587275	0.332374138375005	0.0132372308922711	4	0.482610379467347
647	NEW YORK POST	The New York Post	Newspaper	All Editions	NA	September 6, 2012	2012	9	81	The Issue: Women in the national political conve	1	0	1	1	1	TRUE	major_paper	NYPOST.COM	0.2497	0.534216728080571	0.0148043999823202	0.0594253325242131	0.0352290312317198	0.00908702591641734	0.0278214574747264	0.291010133300208	0.0284058914898249	1	0.534216728080571
648	NEW YORK POST	The New York Post	Newspaper	All Editions	NA	August 9, 2016	2016	8	32	There's a reason US economic growth all but flat	1	0	1	1	1	TRUE	major_paper	NYPOST.COM	0.2497	0.310491908753716	0.0523004522152482	0.0164978600154804	0.349664568252506	0.00551591920453678	0.00314793029633883	0.119510115747982	0.142871245514192	4	0.349664568252506
649	NEW YORK POST	The New York Post	Newspaper	All Editions	NA	January 15, 2017	2017	1	13	Dear John: I'm an avid reader of The Post and I	1	0	1	1	1	TRUE	major_paper	NYPOST.COM	0.2497	0.00979263226547168	0.147190771867705	0.0283162808910697	0.188930256281054	0.0127411919151875	0.185901344215493	0.414697879860436	0.012429642703582	7	0.414697879860436
650	NEW YORK POST	The New York Post	NA	News	NA	October 19, 1998	1998	10	250	THE debate over Al D'Amato's abortion record rem	1	0	1	1	1	TRUE	major_paper	NYPOST.COM	0.2497	0.561717416640959	0.0693499755041793	0.0333693718392094	0.0445483336606304	0.032955493341455	0.0142500466304315	0.125133799784455	0.118675562598681	1	0.561717416640959
651	NEW YORK POST	The New York Post	Newspaper	Sports+Late City Final	NA	February 7, 2009	2009	2	110	A group of key Senate Democrats and Republicans	1	0	1	1	1	TRUE	major_paper	NYPOST.COM	0.2497	0.114761781153805	0.0398842112328904	0.033608982806907	0.0871492303666796	0.0141507026690101	0.00677995407932408	0.0910528839668347	0.612612253724549	8	0.612612253724549
652	NEW YORK POST	The New York Post	Newspaper	All Editions	NA	May 18, 2012	2012	5	77	ALBANY - Gov. Cuomo moved yesterday to end what	1	0	1	1	1	TRUE	major_paper	NYPOST.COM	0.2497	0.0789525749291816	0.598762669253175	0.148362165231305	0.0236524187037408	0.024470243957524	0.0142132092477557	0.0440511942764821	0.0675355244008355	2	0.598762669253175
653	NEW YORK POST	The New York Post	Newspaper	All Editions	NA	January 6, 2013	2013	1	61	They're on the dole - and watching the pole. W	1	0	1	1	1	TRUE	major_paper	NYPOST.COM	0.2497	0.0358218774659724	0.234662909820518	0.211065981846107	0.0102274683699114	0.278830149242812	0.0685638948675857	0.109989276478177	0.0508384419089166	5	0.278830149242812
654	NEW YORK POST	The New York Post	NA	Entertainment	NA	December 3, 1998	1998	12	252	STOCKBROKERS are still cleaning up on Wall Stree	1	0	1	1	1	TRUE	major_paper	NYPOST.COM	0.2497	0.0124527215566836	0.0212533795617756	0.0194172779183848	0.155555898942964	0.0286744058541538	0.0904001824092286	0.667029657474843	0.00521647628196629	7	0.667029657474843
655	NEW YORK POST	The New York Post	Newspaper	All Editions	NA	September 19, 2012	2012	9	81	WASHINGTON - Mitt Romney's controversial claim a	1	0	1	1	1	TRUE	major_paper	NYPOST.COM	0.2497	0.107302715094053	0.0223481710191907	0.0882105346184659	0.591446080419458	0.00262150920759769	0.00638572681447075	0.0809862556515074	0.100699007175257	4	0.591446080419458
656	NEW YORK POST	The New York Post	Newspaper	All Editions	NA	April 20, 2012	2012	4	76	The Issue: Mitt Romney's criticisms of Pres. Oba	1	0	1	1	1	TRUE	major_paper	NYPOST.COM	0.2497	0.626952027765732	0.0115237376676224	0.00828129719058168	0.0401641027886385	0.0178018227033158	0.0176838782692206	0.204615021258401	0.0729781123564879	1	0.626952027765732
657	NEW YORK POST	The New York Post	Newspaper	All Editions	NA	June 1, 2014	2014	6	54	'The VA is set up to deny that problems exist.'	1	0	1	1	1	TRUE	major_paper	NYPOST.COM	0.2497	0.0600396487903175	0.208910115204822	0.0630100491848479	0.0178619641100014	0.113264541507137	0.299627559961871	0.2280464609507	0.00923966029030366	6	0.299627559961871
658	NEW YORK POST	The New York Post	Newspaper	All Editions	NA	November 29, 2009	2009	11	119	p. 97 PDF AT THIS time of giving thanks, New Yo	1	0	1	1	1	TRUE	major_paper	NYPOST.COM	0.2497	0.0052195157244373	0.0612227731489949	0.0289712744587707	0.0157602420305332	0.0327866259923942	0.480666677996043	0.374121422762902	0.001251467885925	6	0.480666677996043
659	NEW YORK POST	The New York Post	Newspaper	All Editions	NA	September 19, 2012	2012	9	81	Stipulated: Mitt Romney's assertion that half of	1	0	1	1	1	TRUE	major_paper	NYPOST.COM	0.2497	0.342695529414979	0.0162206977977774	0.081989607956155	0.338720305569656	0.00279664048722318	0.00912688752471072	0.106790744162677	0.101659587086822	1	0.342695529414979
660	NEW YORK POST	The New York Post	Newspaper	Sports+Late City Final	NA	June 18, 2011	2011	6	90	In a colossal failure of 9/11 security measures,	1	0	1	1	1	TRUE	major_paper	NYPOST.COM	0.2497	0.0141183031573601	0.443350738974044	0.00940582095838742	0.034072767000178	0.287651545571546	0.057597500396388	0.150165212551423	0.00363811139067283	2	0.443350738974044
661	NEW YORK POST	The New York Post	Newspaper	Metro	NA	December 6, 2017	2017	12	24	Wisconsin Gov. Scott Walker is pushing a plan to	1	0	1	1	1	TRUE	major_paper	NYPOST.COM	0.2497	0.168898647984418	0.200798206077211	0.384194880902857	0.0261895719657849	0.0549898069789379	0.0168368993412153	0.0651822434411625	0.0829097433084137	3	0.384194880902857
662	NEW YORK POST	The New York Post	NA	All Editions	NA	September 20, 2000	2000	9	225	A federal judge has ruled the city violated the	1	0	1	1	1	TRUE	major_paper	NYPOST.COM	0.2497	0.00830442574422316	0.490201987041117	0.328310329191834	0.0322983878922131	0.0120820515142847	0.0893684283561059	0.0324725451082474	0.00696184515197495	2	0.490201987041117
663	NEW YORK POST	The New York Post	Newspaper	All Editions	NA	September 9, 2012	2012	9	81	While New York City's most elite and selective	1	0	1	1	1	TRUE	major_paper	NYPOST.COM	0.2497	0.0102246530878839	0.181658159799779	0.0206003205692351	0.0407988004014278	0.151592120598869	0.254297423575971	0.338590852645967	0.00223766932086764	7	0.338590852645967
664	NEW YORK POST	The New York Post	Newspaper	All Editions	NA	September 19, 2012	2012	9	81	WASHINGTON - Mitt Romney moved quickly to steady	1	0	1	1	1	TRUE	major_paper	NYPOST.COM	0.2497	0.416291785978454	0.0226808466563	0.13233548071336	0.187471805392216	0.00391361236807618	0.0116306639878333	0.176983033472342	0.0486927714314177	1	0.416291785978454
665	NEW YORK POST	The New York Post	Newspaper	All Editions	NA	September 13, 2012	2012	9	81	The Issue: The US economy's continued sluggishne	1	0	1	1	1	TRUE	major_paper	NYPOST.COM	0.2497	0.103689545379339	0.0201175110476549	0.0391157391505427	0.674132233426763	0.00470657725417691	0.00933979502001491	0.127787684070373	0.0211109146511365	4	0.674132233426763
666	NEW YORK POST	The New York Post	Newspaper	All Editions	NA	February 3, 2011	2011	2	86	Transportation projects were anything but stimul	1	0	1	1	1	TRUE	major_paper	NYPOST.COM	0.2497	0.021967604019284	0.244974431819341	0.0309930413821686	0.233884050125605	0.0261479962782856	0.00418072193635134	0.0327952759565694	0.405056878482395	8	0.405056878482395
667	NEW YORK POST	The New York Post	Newspaper	All Editions	NA	January 23, 2005	2005	1	157	PALM BEACH - In the Holy Bible, it's called The	1	0	1	1	1	TRUE	major_paper	NYPOST.COM	0.2497	0.128066069287351	0.137507465735822	0.00749063236885257	0.0121473561214939	0.166832280648183	0.0171297197552504	0.522333780963963	0.00849269511908409	7	0.522333780963963
668	NEW YORK POST	The New York Post	Newspaper	All Editions	NA	September 10, 2012	2012	9	81	City investigators saved taxpayers nearly a bill	1	0	1	1	1	TRUE	major_paper	NYPOST.COM	0.2497	0.00895036183607336	0.394624720942329	0.145395065729682	0.0852956894059742	0.0414893629227936	0.0567700364570218	0.252193036251505	0.0152817264546216	2	0.394624720942329
669	NEW YORK POST	The New York Post	Newspaper	All Editions	NA	January 24, 2011	2011	1	85	Foul is fair in the fetid air of the state Legis	1	0	1	1	1	TRUE	major_paper	NYPOST.COM	0.2497	0.0318352724428567	0.127920169377919	0.0702981777521729	0.524148879558818	0.0122981705660102	0.0436553488067974	0.142027482235144	0.0478164992602815	4	0.524148879558818
670	NEW YORK POST	The New York Post	Newspaper	All Editions	NA	October 3, 2010	2010	10	106	Amid the depressing data released by the US Cen	1	1	1	1	1	TRUE	major_paper	NYPOST.COM	0.2497	0.00393179296941792	0.0791678989637821	0.134824822436671	0.606632228111273	0.00623097188455563	0.0939144482424918	0.0717023595314471	0.00359547786036189	4	0.606632228111273
671	NEW YORK POST	The New York Post	Newspaper	All Editions	NA	January 3, 2011	2011	1	85	The master bedroom at the governor's mansion got	1	0	1	1	1	TRUE	major_paper	NYPOST.COM	0.2497	0.112441672722786	0.104520616366206	0.0188746444535653	0.00933190072921467	0.0861693028098986	0.260929284581367	0.403666167094181	0.00406641124278132	7	0.403666167094181
672	NEW YORK TIMES	The New York Times	Series	Section A	NA	April 20, 1999	1999	4	232	DATELINE: MILWAUKEE She had practiced her lin	1	0	1	1	1	TRUE	major_paper	NYTIMES.COM	-0.5469	0.0951025394551255	0.0280721463473124	0.143232163302457	0.00634452734172863	0.0677779083990853	0.256238318115844	0.400306842343766	0.00292555469468116	7	0.400306842343766
673	NEW YORK TIMES	The New York Times	Summary	Section A	NA	March 22, 1999	1999	3	231	OPEC Plans Production Cut OPEC plans to take mo	1	0	1	1	1	TRUE	major_paper	NYTIMES.COM	-0.5469	0.0419222395631381	0.243448099888457	0.0310792921015588	0.0341080079900746	0.176866824495245	0.060761385090143	0.351571553561401	0.0602425973099818	7	0.351571553561401
674	NEW YORK TIMES	The New York Times	NA	Section 1	NA	March 5, 1994	1994	3	291	DATELINE: CAMDEN, N.J., March 4 A plastic card	1	0	1	1	1	TRUE	major_paper	NYTIMES.COM	-0.5469	0.0104628302323071	0.403419193213528	0.500432001446398	0.0142123127901514	0.00895867711021748	0.00874718122639417	0.0126290513184497	0.0411387526625542	3	0.500432001446398
675	NEW YORK TIMES	The New York Times	Review		NA	October 1, 1995	1995	10	286	LETTERS TO MY CHILDREN By Robert C. Maynard wi	1	0	1	1	1	TRUE	major_paper	NYTIMES.COM	-0.5469	0.310193312972765	0.0556469735700232	0.0493352256747784	0.0334035911937495	0.0409686585883587	0.201467271560424	0.304116910713158	0.00486805572674342	1	0.310193312972765
676	NEW YORK TIMES	The New York Times	Newspaper	Section WK	NA	December 6, 2009	2009	12	120	''This is the most urgent time for our feeding pr	1	0	1	1	1	TRUE	major_paper	NYTIMES.COM	-0.5469	0.134793589062545	0.0777940242447932	0.183810473977507	0.273780616778476	0.0117329430658419	0.0681432306606025	0.185066849557803	0.0648782726524323	4	0.273780616778476
677	NEW YORK TIMES	The New York Times	NA	Section A	NA	July 18, 1994	1994	7	295	DATELINE: WASHINGTON, July 17 Mistakes and fra	1	0	1	1	1	TRUE	major_paper	NYTIMES.COM	-0.5469	0.0112597916127787	0.381519687266437	0.317429653962121	0.136035707537824	0.00550791703380505	0.00767940629516315	0.0219284242447039	0.118639412047168	2	0.381519687266437
678	NEW YORK TIMES	The New York Times	NA	Section 1	NA	September 27, 1992	1992	9	321	With less than 24 hours' notice, Lang Ngan, a 2	1	0	1	1	1	TRUE	major_paper	NYTIMES.COM	-0.5469	0.111857951106377	0.0459928033155468	0.0292007089943985	0.0111061310447329	0.0283199094194277	0.463650733842846	0.307367708477369	0.00250405379930258	6	0.463650733842846
679	NEW YORK TIMES	The New York Times	Op-Ed	Section	NA	April 25, 2014	2014	4	52	On a visit to the capital a few weeks ago, I was	1	0	1	1	1	TRUE	major_paper	NYTIMES.COM	-0.5469	0.133164625886723	0.179245887683928	0.0174976760105446	0.429862972877156	0.0220612772845296	0.0493914768312079	0.138098675471602	0.0306774079543086	4	0.429862972877156
680	NEW YORK TIMES	The New York Times	Letter	Section 4	NA	October 11, 1992	1992	10	322	To the Editor: "No Painless Way Out for the Nex	1	0	1	1	1	TRUE	major_paper	NYTIMES.COM	-0.5469	0.116484609361801	0.0122562765834365	0.0213335631533406	0.192176657824993	0.00490248850703219	0.00463578416019521	0.126894447178937	0.521316173230265	8	0.521316173230265
681	NEW YORK TIMES	The New York Times	NA	Section A	NA	January 6, 1997	1997	1	253	DATELINE: WASHINGTON, Jan. 5 As a new Congres	1	0	1	1	1	TRUE	major_paper	NYTIMES.COM	-0.5469	0.33945988700179	0.00958147563023929	0.0352266643207604	0.0521337608178535	0.0017818936491185	0.0030003411876058	0.0669808000750304	0.491835177317602	8	0.491835177317602
682	NEW YORK TIMES	The New York Times	NA	Section A	NA	September 26, 1994	1994	9	297	DATELINE: WASHINGTON, Sept. 24 In a decision t	1	0	1	1	1	TRUE	major_paper	NYTIMES.COM	-0.5469	0.0603035987345263	0.0653500580501973	0.6342981381003	0.0316162551353267	0.00410872370135713	0.00801120006365031	0.0183987625576777	0.177913263656965	3	0.6342981381003
683	NEW YORK TIMES	The New York Times	NA	Section A	NA	January 25, 1999	1999	1	229	DATELINE: SAN DIEGO, Jan. 24 The Clinton Admin	1	0	1	1	1	TRUE	major_paper	NYTIMES.COM	-0.5469	0.24378522459799	0.174270830569964	0.319307455180153	0.0377648415613129	0.0176294569108029	0.010062878687171	0.0230181178011304	0.174161194691476	3	0.319307455180153
684	NEW YORK TIMES	The New York Times	Newspaper	Section D	NA	November 21, 2005	2005	11	167	This morning, Billy Wagner and his wife, Sarah,	1	0	1	1	1	TRUE	major_paper	NYTIMES.COM	-0.5469	0.032495930853856	0.13769567236754	0.00715578195637761	0.0260623567615614	0.121400890458039	0.163896174624753	0.508105216790376	0.00318797618749729	7	0.508105216790376
685	NEW YORK TIMES	The New York Times	Newspaper	Section A	NA	October 15, 2010	2010	10	106	DENMARK, Me. -- The house that set off the nati	1	0	1	1	1	TRUE	major_paper	NYTIMES.COM	-0.5469	0.0137017351484111	0.310011564325501	0.0157990993071489	0.157189710041093	0.045028254591219	0.182648816151612	0.247811700439821	0.027809119995194	2	0.310011564325501
686	NEW YORK TIMES	The New York Times	Newspaper	Section A	NA	October 5, 2009	2009	10	118	NEW YORK ON LESS: Bronx Food Banks See Longer	1	0	1	1	1	TRUE	major_paper	NYTIMES.COM	-0.5469	0.00493693596640868	0.239977719773319	0.0416991807198599	0.219232911658226	0.0252096005390993	0.29630407561412	0.169601995186297	0.00303758054267086	6	0.29630407561412
687	NEW YORK TIMES	The New York Times	NA		NA	April 4, 1999	1999	4	232	DATELINE: TRENTON While most of New Jersey's R	1	0	1	1	1	TRUE	major_paper	NYTIMES.COM	-0.5469	0.620913626883988	0.0384626387510063	0.0466820215289599	0.0768939392167228	0.00900776949755204	0.00974663188981487	0.0987128176402154	0.0995805545917406	1	0.620913626883988
688	NEW YORK TIMES	The New York Times	NA	Section 1	NA	October 17, 1992	1992	10	322	DATELINE: WATKINS GLEN, N.Y., Oct. 16 John T.	0	0	0	1	1	TRUE	major_paper	NYTIMES.COM	-0.5469	0.00833633724507081	0.19586341332256	0.113028392673454	0.0288733308455204	0.317623612760445	0.254186210154762	0.0744645028978447	0.0076242001003427	5	0.317623612760445
689	NEW YORK TIMES	The New York Times	NA	Section A	NA	February 23, 1999	1999	2	230	The homeless man fidgets nervously in the welfa	1	0	1	1	1	TRUE	major_paper	NYTIMES.COM	-0.5469	0.0045765587864783	0.183575473460444	0.240660155218531	0.0393331300419945	0.0117984067812815	0.210460971421258	0.305503579922658	0.00409172436735465	7	0.305503579922658
690	NEW YORK TIMES	The New York Times	Newspaper	Section A	NA	April 3, 2014	2014	4	52	WASHINGTON -- After months of pummeling by Repu	1	0	1	1	1	TRUE	major_paper	NYTIMES.COM	-0.5469	0.345410388355347	0.00846286170715074	0.0995399192118017	0.117688065216187	0.00158494136567931	0.00456916269954122	0.0925676093798119	0.330177052064481	1	0.345410388355347
691	NEW YORK TIMES	The New York Times	Letter	Section	NA	October 16, 2010	2010	10	106	To the Editor: Re ''No Food Stamps for Sodas,''	1	0	1	1	1	TRUE	major_paper	NYTIMES.COM	-0.5469	0.154705446814826	0.232739680900105	0.0405266994534341	0.15602288940573	0.0502513260838877	0.0250096561848982	0.171360941222873	0.169383359934247	2	0.232739680900105
692	NEW YORK TIMES	The New York Times	Newspaper	Section A	NA	November 21, 2016	2016	11	35	Lyubov Bilik fled the only home she knew in 1941	1	0	1	1	1	TRUE	major_paper	NYTIMES.COM	-0.5469	0.0882792367463552	0.0296092052327034	0.0077240391119807	0.0079564560172417	0.0377779480207452	0.641939289334456	0.184961233610991	0.00175259192552629	6	0.641939289334456
693	NEW YORK TIMES	The New York Times	Letter	Section A	NA	December 27, 2008	2008	12	132	To the Editor: Your editorial ''Welfare as We K	1	0	1	1	1	TRUE	major_paper	NYTIMES.COM	-0.5469	0.0995983777387884	0.0507160337621607	0.207725390435755	0.137563962272365	0.0570417384986812	0.239686596925405	0.169361083526365	0.0383068168404798	6	0.239686596925405
694	NEW YORK TIMES	The New York Times	NA		NA	February 4, 1999	1999	2	230	PRESIDENT CLINTON'S budget includes dozens of ne	0	0	0	1	1	TRUE	major_paper	NYTIMES.COM	-0.5469	0.0661637634535271	0.0195455110534548	0.12531916361025	0.235592567098159	0.00138823460851045	0.0049370429920916	0.0587901614996546	0.488263555684353	8	0.488263555684353
695	NEW YORK TIMES	The New York Times	Op-Ed	Section A	NA	February 26, 2016	2016	2	26	Lack of self-awareness can be fatal. The hapless	1	0	1	1	1	TRUE	major_paper	NYTIMES.COM	-0.5469	0.580192318921602	0.0045182716538158	0.0087286247521509	0.0546547681637331	0.00162024426398188	0.00769787685495085	0.323871253038825	0.0187166423509412	1	0.580192318921602
696	NEW YORK TIMES	The New York Times	Editorial	Section A	NA	December 25, 2009	2009	12	120	Faced with soaring prison costs, states are fina	1	0	1	1	1	TRUE	major_paper	NYTIMES.COM	-0.5469	0.0306516910558336	0.23058954404168	0.30505769481674	0.108681357757061	0.158378347816541	0.0353828594049461	0.0790358620338214	0.0522226430733768	3	0.30505769481674
697	NEW YORK TIMES	The New York Times	NA		NA	October 27, 1992	1992	10	322	DATELINE: WASHINGTON, Oct. 26 At the beginnin	1	0	1	1	1	TRUE	major_paper	NYTIMES.COM	-0.5469	0.198376257262574	0.0151969543273697	0.0547402120201993	0.263311341346081	0.00151950757514227	0.0195877883603171	0.0771080416441475	0.370159897464169	8	0.370159897464169
698	NEW YORK TIMES	The New York Times	NA	Section A	NA	January 20, 1999	1999	1	229	A two-month Federal inquiry into New York City'	1	0	1	1	1	TRUE	major_paper	NYTIMES.COM	-0.5469	0.0215915501515122	0.591405563711749	0.334718788554757	0.00757819888984459	0.00427817423787929	0.0105615095882165	0.0247008276222567	0.00516538724378444	2	0.591405563711749
699	NEW YORK TIMES	The New York Times	News		Paul Krugman	January 27, 2009	2009	1	109	HIGHLIGHT: One big question in the stimulus dis	1	0	1	1	1	TRUE	major_paper	NYTIMES.COM	-0.5469	0.0294513588935612	0.0688595293455876	0.012528365835761	0.462656077798135	0.0163400998687799	0.0104253168211741	0.285218590838914	0.114520660598087	4	0.462656077798135
700	NEW YORK TIMES	The New York Times	Summary	Section B	NA	March 15, 1994	1994	3	291	TUBERCULOSIS IN DECLINE Federal health officia	0	0	0	1	1	TRUE	major_paper	NYTIMES.COM	-0.5469	0.0910577734629442	0.329290667287079	0.0315838369673436	0.0499977712486811	0.263524220872314	0.129822754826713	0.0488339678549249	0.0558890074800003	2	0.329290667287079
701	NEW YORK TIMES	The New York Times	Summary	Section A	NA	October 9, 2010	2010	10	106	International CHILE MINERS NEAR RESCUE As Dril	1	0	1	1	1	TRUE	major_paper	NYTIMES.COM	-0.5469	0.163394524824116	0.33310393621408	0.0317623938700323	0.0902982417375262	0.108850798103205	0.0288027898380675	0.226775634284464	0.0170116811285089	2	0.33310393621408
702	NEW YORK TIMES	The New York Times	NA	Section B	NA	March 17, 1999	1999	3	231	A clerk in a Brooklyn grocery was beaten and bri	1	0	1	1	1	TRUE	major_paper	NYTIMES.COM	-0.5469	0.00394818656496543	0.110803903853274	0.00227510376215132	0.00331600685984527	0.58383003348939	0.141705888749695	0.153493311747168	0.000627564973512238	5	0.58383003348939
703	NEW YORK TIMES	The New York Times	NA	Section B	NA	July 13, 2000	2000	7	223	In a stinging decision, a state judge ruled yest	1	0	1	1	1	TRUE	major_paper	NYTIMES.COM	-0.5469	0.00450202278462241	0.542749865761674	0.154971235001653	0.0127216201898835	0.0983160627747286	0.163564430817642	0.0190151994084403	0.00415956326135525	2	0.542749865761674
704	NEW YORK TIMES	The New York Times	Newspaper	Section D	NA	July 26, 2012	2012	7	79	How would you explain to Big Bird what a food pa	0	0	0	1	1	TRUE	major_paper	NYTIMES.COM	-0.5469	0.0203852854657704	0.0170925119255327	0.158911865641324	0.0906573327619495	0.00463023543397412	0.328914776959542	0.37359896243817	0.00580902937373691	7	0.37359896243817
705	NEW YORK TIMES	The New York Times	Newspaper	Section WK	NA	October 31, 2010	2010	10	106	WASHINGTON -- In the Boston-area home of a weal	1	0	1	1	1	TRUE	major_paper	NYTIMES.COM	-0.5469	0.604996524762669	0.0132639833784292	0.0073558732631617	0.037584060253031	0.0137272578452561	0.0195349431517109	0.268224241593195	0.0353131157525471	1	0.604996524762669
706	NEW YORK TIMES	The New York Times	Summary	Section A	NA	February 25, 1999	1999	2	230	INTERNATIONAL A3-16 Austria Search Continu	1	0	1	1	1	TRUE	major_paper	NYTIMES.COM	-0.5469	0.232586920407125	0.302584890866509	0.0450891192563333	0.128320211664154	0.141670504485528	0.0125641177598604	0.0309010020874748	0.106283233473015	2	0.302584890866509
707	NEW YORK TIMES	The New York Times	Newspaper	Section C	NA	February 10, 2007	2007	2	134	If you are still seeking the perfect gift for V	1	0	1	1	1	TRUE	major_paper	NYTIMES.COM	-0.5469	0.0128307200185601	0.11407362702479	0.0484447233568152	0.23547279361468	0.0373819258132031	0.163179613284086	0.382510915050134	0.00610568183773145	7	0.382510915050134
708	NEW YORK TIMES	The New York Times	News Analysis	Section A	NA	May 20, 2008	2008	5	125	DATELINE: WASHINGTON Few pieces of legislatio	1	0	1	1	1	TRUE	major_paper	NYTIMES.COM	-0.5469	0.140809385048689	0.0251538951510834	0.0341010064152862	0.102240392667101	0.00370525226311407	0.00714384574639988	0.100878886643997	0.585967336064329	8	0.585967336064329
709	NEW YORK TIMES	The New York Times	NA	Section A	NA	February 25, 1999	1999	2	230	DATELINE: WASHINGTON, Feb. 24 The Senate today	1	0	1	1	1	TRUE	major_paper	NYTIMES.COM	-0.5469	0.176479099694427	0.136924042100571	0.0141394165287873	0.0595210669048021	0.0184733206402912	0.00185464686946308	0.0157019320762691	0.57690647518539	8	0.57690647518539
710	NEW YORK TIMES	The New York Times	NA	Section A	NA	November 4, 1991	1991	11	335	DATELINE: WASHINGTON, Nov. 3 Members of Congr	1	0	1	1	1	TRUE	major_paper	NYTIMES.COM	-0.5469	0.060278006556863	0.0293334566385538	0.0432176971603019	0.196031010702448	0.0021184480816763	0.00237962087972865	0.0490131615986749	0.617628598381754	8	0.617628598381754
711	NEW YORK TIMES	The New York Times	News		Paul Krugman	January 5, 2009	2009	1	109	HIGHLIGHT: I don&#8217;t know yet. But news rep	1	0	1	1	1	TRUE	major_paper	NYTIMES.COM	-0.5469	0.0469700235643073	0.0158566644935355	0.021425624334301	0.32737795126429	0.00214537524827005	0.00731067062629026	0.295602130421215	0.283311560047791	4	0.32737795126429
712	NEW YORK TIMES	The New York Times	Newspaper	Section A	NA	November 2, 2012	2012	11	83	WAUSAU, Wis. -- The presidential candidates rare	1	0	1	1	1	TRUE	major_paper	NYTIMES.COM	-0.5469	0.526470563243624	0.0309900090045759	0.0161091105130411	0.0877541527577236	0.0595129090178212	0.0523594870836993	0.214058490041505	0.01274527833801	1	0.526470563243624
713	NEW YORK TIMES	The New York Times	Newspaper		NA	November 13, 2016	2016	11	35	WARREN, Mich. -- This state was one of the bigg	1	0	1	1	1	TRUE	major_paper	NYTIMES.COM	-0.5469	0.511243273854703	0.0509615716587392	0.0169618188614856	0.107145018543783	0.100118796838061	0.0938880725439315	0.109908640435038	0.00977280726425895	1	0.511243273854703
714	NEW YORK TIMES	The New York Times	Summary	Section A	NA	March 23, 1999	1999	3	231	INTERNATIONAL A3-12 U.S. Envoy Presses Ser	1	0	1	1	1	TRUE	major_paper	NYTIMES.COM	-0.5469	0.301081781356992	0.329897708131845	0.0125895140423956	0.0651906569882023	0.214328993251025	0.0304482383787615	0.0227186000894834	0.0237445077612955	2	0.329897708131845
715	NEW YORK TIMES	The New York Times	Newspaper		NA	August 26, 2001	2001	8	212	DIANA BELOZOVSKY was 13 when she and her parents	1	0	1	1	1	TRUE	major_paper	NYTIMES.COM	-0.5469	0.0780936669171781	0.123436982557081	0.0974136582620441	0.0184293118372746	0.00860445980389508	0.418045590028897	0.252402579736463	0.00357375085716703	6	0.418045590028897
716	NEW YORK TIMES	The New York Times	NA		NA	September 24, 1995	1995	9	285	DATELINE: WASHINGTON EIGHTY-SEVEN of the Cong	1	0	1	1	1	TRUE	major_paper	NYTIMES.COM	-0.5469	0.188572983367853	0.0335157808572613	0.295141821550305	0.186997637180744	0.00234283450720588	0.0178342059712043	0.120047867216846	0.155546869348581	3	0.295141821550305
717	NEW YORK TIMES	The New York Times	Newspaper	Section 1	NA	November 13, 2005	2005	11	167	Santa Artiles says that her most fervent wish is	1	0	1	1	1	TRUE	major_paper	NYTIMES.COM	-0.5469	0.00186762386840095	0.0129188827099617	0.0509151603290977	0.0324673257360479	0.00356541619719435	0.862669106620881	0.0347332809348743	0.000863203603542949	6	0.862669106620881
718	NEW YORK TIMES	The New York Times	Op-Ed	Section SR	NA	March 27, 2016	2016	3	27	IT was my first year as a scholarship student a	1	0	1	1	1	TRUE	major_paper	NYTIMES.COM	-0.5469	0.0358023144610464	0.0203985269969635	0.0531158481139567	0.0419234667661251	0.00787291087538062	0.212318223170592	0.624270358248117	0.00429835136781894	7	0.624270358248117
719	NEW YORK TIMES	The New York Times	Newspaper	Section A	NA	February 28, 2014	2014	2	50	RUTLAND, Vt. -- Block by block, this city in ce	1	0	1	1	1	TRUE	major_paper	NYTIMES.COM	-0.5469	0.0219250225491906	0.249649793959993	0.0209433141576431	0.0576984018895374	0.172205562706488	0.201659657801522	0.253047244315456	0.02287100262017	7	0.253047244315456
720	NEW YORK TIMES	The New York Times	NA	Section A	NA	February 20, 1999	1999	2	230	DATELINE: MIAMI BEACH, Feb. 19 In his three ye	1	0	1	1	1	TRUE	major_paper	NYTIMES.COM	-0.5469	0.320597909448183	0.419194642754923	0.0329983326138623	0.116965512987243	0.0404485178904321	0.0124304444331668	0.0377263512239777	0.019638288648212	2	0.419194642754923
721	NEW YORK TIMES	The New York Times	Letter	Section A	NA	February 22, 2016	2016	2	26	To the Editor: In ''A Hidden Cost to Giving Kid	1	0	1	1	1	TRUE	major_paper	NYTIMES.COM	-0.5469	0.0858106139175501	0.0160394370095197	0.246989083462468	0.0849580844435482	0.00387454157013097	0.115776048855651	0.438155349686846	0.00839684105428577	7	0.438155349686846
722	NEW YORK TIMES	The New York Times	Newspaper	Section BU	NA	February 23, 2014	2014	2	50	Three years ago, a labor leader named Marty Bei	1	0	1	1	1	TRUE	major_paper	NYTIMES.COM	-0.5469	0.176994300919644	0.316941755497668	0.106275509155131	0.131894103798311	0.0474138809956149	0.00640012354024993	0.141134556549705	0.0729457695436757	2	0.316941755497668
723	NEW YORK TIMES	The New York Times	Summary	Section D	NA	March 14, 1995	1995	3	279	President Zedillo of Mexico Sees Crisis in Othe	1	0	1	1	1	TRUE	major_paper	NYTIMES.COM	-0.5469	0.092993344425211	0.363890628891653	0.0350616629868117	0.374063594036415	0.0190281633060191	0.00411758459970457	0.0248060267128518	0.0860389950413333	4	0.374063594036415
724	NEW YORK TIMES	The New York Times	Newspaper	Section BU	NA	October 25, 2009	2009	10	118	AMERICANS seem to like the idea of broadening he	1	0	1	1	1	TRUE	major_paper	NYTIMES.COM	-0.5469	0.027509433378059	0.0109784997753032	0.236435959424373	0.463476051730373	0.00071379152414112	0.0078968968720583	0.107832482798426	0.145156884497266	4	0.463476051730373
725	NEW YORK TIMES	The New York Times	Newspaper	Section A	NA	March 24, 2010	2010	3	99	It was not the normal stuff of a pediatric exam.	1	0	1	1	1	TRUE	major_paper	NYTIMES.COM	-0.5469	0.0125874800015134	0.195504115571339	0.13836717783981	0.0403099680715884	0.0176883537083975	0.440479063737756	0.151004292805028	0.0040595482645687	6	0.440479063737756
726	NEW YORK TIMES	The New York Times	News	US	NA	March 2, 2017	2017	3	15	HIGHLIGHT: Mr. Carson, who has no experience ru	1	0	1	1	1	TRUE	major_paper	NYTIMES.COM	-0.5469	0.369296434610061	0.126819756091285	0.111929052574696	0.128448237770515	0.0183412899080153	0.0596507763399611	0.0811980837022292	0.104316369003238	1	0.369296434610061
727	NEW YORK TIMES	The New York Times	Newspaper	Section C	NA	November 5, 2005	2005	11	167	DATELINE: WASHINGTON, Nov. 4 With critics ham	1	0	1	1	1	TRUE	major_paper	NYTIMES.COM	-0.5469	0.0224500213879127	0.176325668584949	0.0118762467196768	0.679747455119303	0.038001721044573	0.00382976225095804	0.0263141949689265	0.0414549299237006	4	0.679747455119303
728	NEW YORK TIMES	The New York Times	Editorial	Section A	NA	April 2, 2014	2014	4	52	The Republican budget for 2015, released Tuesday	1	0	1	1	1	TRUE	major_paper	NYTIMES.COM	-0.5469	0.105006288307211	0.00910639364179942	0.078011753850374	0.121383901334644	0.00113053689473584	0.00616064473111553	0.182186202429339	0.497014278810781	8	0.497014278810781
729	NEW YORK TIMES	The New York Times	NA	Section B	NA	March 22, 1990	1990	3	339	DATELINE: WASHINGTON, March 21 The Census Bur	1	0	1	1	1	TRUE	major_paper	NYTIMES.COM	-0.5469	0.0449909413643538	0.153268651221104	0.0164756773634715	0.2275874868252	0.121197025752344	0.199096088900318	0.23054616213153	0.00683796644167738	7	0.23054616213153
730	NEW YORK TIMES	The New York Times	NA		NA	March 7, 1991	1991	3	327	DATELINE: WASHINGTON, March 6 President Bush	1	0	1	1	1	TRUE	major_paper	NYTIMES.COM	-0.5469	0.637904389774438	0.0756197874494791	0.0181751103953438	0.033562264711215	0.0338199544130449	0.0516918303536394	0.0710824782007221	0.0781441847021173	1	0.637904389774438
731	NEW YORK TIMES	The New York Times	Newspaper	Section 14	NA	December 4, 2005	2005	12	168	BEDFORD-STUYVESANT is used to having its reputat	1	0	1	1	1	TRUE	major_paper	NYTIMES.COM	-0.5469	0.0131318713379356	0.0829517124438782	0.0097213828479902	0.131405021873294	0.110072654913737	0.146976242570661	0.502346532609864	0.00339458140263932	7	0.502346532609864
732	NEW YORK TIMES	The New York Times	Op-Ed	Section A	NA	March 4, 2016	2016	3	27	So Republicans are going to nominate a candidate	1	0	1	1	1	TRUE	major_paper	NYTIMES.COM	-0.5469	0.542593721477507	0.0124752094625777	0.00912933593464176	0.0228976539744514	0.00257829727099493	0.00721697126763972	0.31020968467455	0.0928991259376377	1	0.542593721477507
733	NEW YORK TIMES	The New York Times	Op-Ed		NA	April 27, 1997	1997	4	256	What a dazzling array of ideas and proposals mak	1	0	1	1	1	TRUE	major_paper	NYTIMES.COM	-0.5469	0.232137491756432	0.016043452309798	0.183900872135132	0.174167418017372	0.00254923627046374	0.074167199654624	0.228390148885426	0.088644180970753	1	0.232137491756432
734	NEW YORK TIMES	The New York Times	Newspaper	Section 1	NA	December 15, 2002	2002	12	204	DATELINE: CORVALLIS, Ore., Dec 9 Seventh-grad	1	0	1	1	1	TRUE	major_paper	NYTIMES.COM	-0.5469	0.0293845718529871	0.193786916394586	0.0420994486363311	0.120721419592329	0.165680090036834	0.0952036499906497	0.167889887528235	0.185234015968049	2	0.193786916394586
735	NEW YORK TIMES	The New York Times	Op-Ed	Section A	NA	February 21, 2014	2014	2	50	Five years have passed since President Obama sig	1	0	1	1	1	TRUE	major_paper	NYTIMES.COM	-0.5469	0.177875269101586	0.0120540290161312	0.0112929341078652	0.496968899728427	0.00150084050401684	0.00303795412568163	0.0892906932222594	0.207979380194032	4	0.496968899728427
736	NEW YORK TIMES	The New York Times	NA		NA	October 1, 1995	1995	10	286	EVERYWHERE the Congressional Republicans are con	1	0	1	1	1	TRUE	major_paper	NYTIMES.COM	-0.5469	0.28726058724054	0.0501523009065046	0.0295971581066948	0.061834357488816	0.0043859990958272	0.00249230878865146	0.0433687346732798	0.520908553699686	8	0.520908553699686
737	NEW YORK TIMES	The New York Times	Newspaper	Section ST	NA	July 26, 2015	2015	7	43	Kevin Sessums, the former Vanity Fair writer who	1	0	1	1	1	TRUE	major_paper	NYTIMES.COM	-0.5469	0.157165144546483	0.122613988849439	0.0103715961708859	0.0282486348502631	0.030044170284747	0.218221366213459	0.424135561075228	0.00919953800949578	7	0.424135561075228
738	NEW YORK TIMES	The New York Times	Newspaper	Section A	NA	November 6, 2010	2010	11	107	Dorothy Hinks may be enfeebled but she is proud	1	0	1	1	1	TRUE	major_paper	NYTIMES.COM	-0.5469	0.00627900801669495	0.199112770522743	0.208366320222243	0.0270113595916344	0.00694062517753947	0.346836732496623	0.202528955546297	0.00292422842622549	6	0.346836732496623
739	NEW YORK TIMES	The New York Times	NA	Section B	NA	October 23, 1992	1992	10	322	DATELINE: POTOSI, Mo., Oct. 21 A convicted mur	1	0	1	1	1	TRUE	major_paper	NYTIMES.COM	-0.5469	0.0620360924409803	0.457382824231226	0.012168008349742	0.0251888994088607	0.341838944482166	0.0198193816326895	0.0634539813684606	0.0181118680858749	2	0.457382824231226
740	NEW YORK TIMES	The New York Times	Obituary (Obit); Biography	Section A	NA	October 23, 2016	2016	10	34	Kigeli V, the last king of a dynasty that ruled	1	0	1	1	1	TRUE	major_paper	NYTIMES.COM	-0.5469	0.352563535730729	0.101632327988278	0.0362596724860045	0.0247803302648238	0.132059069891118	0.280439038305195	0.0649120967245725	0.00735392860928013	1	0.352563535730729
741	NEW YORK TIMES	The New York Times	News		Paul Krugman	April 25, 2009	2009	4	112	HIGHLIGHT: OK, it looks as if major health care	1	0	1	1	1	TRUE	major_paper	NYTIMES.COM	-0.5469	0.164126845394933	0.013636024217469	0.0219359110980949	0.0247949609719223	0.00405901237036204	0.00958514991922862	0.355450383828624	0.406411712199366	8	0.406411712199366
742	NEW YORK TIMES	The New York Times	Newspaper	Section A	NA	November 17, 2016	2016	11	35	Fresh from a promising meeting with a real estat	1	0	1	1	1	TRUE	major_paper	NYTIMES.COM	-0.5469	0.00575984620556956	0.0188807673310066	0.0251916858192749	0.0226620484855337	0.0051052722029013	0.57331352422193	0.347570462739559	0.00151639299422468	6	0.57331352422193
743	NEW YORK TIMES	The New York Times	NA	Section B	NA	September 20, 1995	1995	9	285	DATELINE: WASHINGTON, Sept. 19 Senator Nancy L	1	0	1	1	1	TRUE	major_paper	NYTIMES.COM	-0.5469	0.0446379501422506	0.12764528292174	0.0291016098395384	0.163443383261855	0.0109348717078543	0.00391126705838142	0.0273707641579601	0.59295487091042	8	0.59295487091042
744	NEW YORK TIMES	The New York Times	Newspaper		NA	December 22, 2010	2010	12	108	Every weekday at 8 a.m., Efrenngton Armijos, 50,	1	0	1	1	1	TRUE	major_paper	NYTIMES.COM	-0.5469	0.00156623219717125	0.0349146534113471	0.0371229112348174	0.00989430255764474	0.0132809564242822	0.870614884891046	0.0319581027898123	0.000647956493879593	6	0.870614884891046
745	NEW YORK TIMES	The New York Times	NA		NA	April 27, 1997	1997	4	256	If buildings could shiver, this Camden, N.J., t	1	0	1	1	1	TRUE	major_paper	NYTIMES.COM	-0.5469	0.0372852369071984	0.0178868297103188	0.129650133151398	0.18258534349232	0.0133752870433347	0.183224281032371	0.429600083765474	0.00639280489758595	7	0.429600083765474
746	NEW YORK TIMES	The New York Times	Newspaper	Section F	NA	April 2, 2009	2009	4	112	WEST NEW YORK, N.J. THE one thing Marge Yanker	1	0	1	1	1	TRUE	major_paper	NYTIMES.COM	-0.5469	0.00860239380260746	0.05386649420951	0.0190315324133073	0.137697149282845	0.0551066840771692	0.339316426553061	0.374550916715669	0.0118284029458308	7	0.374550916715669
747	NEW YORK TIMES	The New York Times	NA		NA	June 3, 1999	1999	6	234	PROPONENTS of the 1996 welfare law are finding p	1	0	1	1	1	TRUE	major_paper	NYTIMES.COM	-0.5469	0.0487828130246479	0.0479703084793278	0.361037148346316	0.468147861685095	0.00199450348134379	0.0170355930699733	0.0248617790047879	0.0301699929085083	4	0.468147861685095
748	NEW YORK TIMES	The New York Times	NA		NA	May 9, 1999	1999	5	233	After 18 years of marriage, Paul and Kathy Schr	1	0	1	1	1	TRUE	major_paper	NYTIMES.COM	-0.5469	0.00369400478312018	0.0602273273303797	0.0261647105513086	0.0919760519218797	0.0880136826372131	0.337520391613491	0.390684715809442	0.00171911535316589	7	0.390684715809442
749	NEW YORK TIMES	The New York Times	Op-Ed		NA	November 30, 1994	1994	11	299	Final approval of the Uruguay Round of the Gener	1	0	1	1	1	TRUE	major_paper	NYTIMES.COM	-0.5469	0.0387123034215811	0.0213689966943185	0.136871965269882	0.0792004058093812	0.0045581884113238	0.182023782015081	0.393109731548433	0.144154626829999	7	0.393109731548433
750	NEW YORK TIMES	The New York Times	NA	Section B	NA	March 22, 1999	1999	3	231	Shoppers packed grocery stores throughout New Je	1	0	1	1	1	TRUE	major_paper	NYTIMES.COM	-0.5469	0.00669642821468407	0.493185772141515	0.105562312577146	0.0575521206189694	0.0198165297670432	0.0371478044242514	0.268563658368742	0.0114753738876486	2	0.493185772141515
751	NEW YORK TIMES	The New York Times	Newspaper	Section B	NA	November 21, 2005	2005	11	167	Aileen Wu lifted her long sleeve over her left	1	0	1	1	1	TRUE	major_paper	NYTIMES.COM	-0.5469	0.00522582022862499	0.0217675575287342	0.04288983649829	0.0219216330365644	0.00835392473791632	0.752739764356323	0.145777430826592	0.00132403278695595	6	0.752739764356323
752	NEW YORK TIMES	The New York Times	Newspaper	Section A	NA	February 5, 2014	2014	2	50	WASHINGTON -- No one was happier than Danny Murp	1	0	1	1	1	TRUE	major_paper	NYTIMES.COM	-0.5469	0.0865911547740289	0.0577277996954894	0.121937555542907	0.104094704803282	0.00304063538985586	0.0120124663772474	0.0344975846613173	0.580098098755872	8	0.580098098755872
753	NEW YORK TIMES	The New York Times	Newspaper	Section B	NA	December 14, 2005	2005	12	168	''Do you think we sell more books or CD's?'' Th	1	0	1	1	1	TRUE	major_paper	NYTIMES.COM	-0.5469	0.00303007997507897	0.0431839310424448	0.0419765604697584	0.00811784237380695	0.0578447220006723	0.71040387875015	0.134572851797138	0.000870133590949575	6	0.71040387875015
754	NEW YORK TIMES	The New York Times	Newspaper	Section C	NA	November 14, 2016	2016	11	35	PRINCETON, N.J. -- Journalism may be the first	1	0	1	1	1	TRUE	major_paper	NYTIMES.COM	-0.5469	0.578955209305388	0.0134307600126402	0.0059625417091115	0.116606127018267	0.00258080006717077	0.00418980020778273	0.247667017463167	0.0306077442164722	1	0.578955209305388
755	NEW YORK TIMES	The New York Times	Series	Section B	NA	November 1, 2005	2005	11	167	In the past week, Mayor Michael R. Bloomberg ha	1	0	1	1	1	TRUE	major_paper	NYTIMES.COM	-0.5469	0.0944415288984909	0.302562264121557	0.343014973785971	0.0516386993459471	0.00454023335899876	0.124973711731663	0.0718827886641328	0.00694580009323907	3	0.343014973785971
756	NEW YORK TIMES	The New York Times	Letter		NA	December 18, 1997	1997	12	264	To the Editor: While I am delighted with the r	1	0	1	1	1	TRUE	major_paper	NYTIMES.COM	-0.5469	0.034119507566802	0.207677449722925	0.17309436720355	0.0343845025942636	0.114153112261637	0.31840649024638	0.0796839347351233	0.0384806356693203	6	0.31840649024638
757	NEW YORK TIMES	The New York Times	Newspaper		NA	January 15, 2001	2001	1	205	At 5:30 p.m. last Tuesday, in a large open spac	1	0	1	1	1	TRUE	major_paper	NYTIMES.COM	-0.5469	0.00178296016278566	0.0315451157722644	0.062151179235077	0.0228082000251971	0.00508649702257966	0.769379469436262	0.106278946034174	0.00096763231165998	6	0.769379469436262
758	NEW YORK TIMES	The New York Times	NA	Section 1	NA	November 28, 1992	1992	11	323	DATELINE: KOTLIK, Alaska This tiny fishing vi	1	0	1	1	1	TRUE	major_paper	NYTIMES.COM	-0.5469	0.0141664205705929	0.13696554947263	0.0441662254145483	0.112206182037812	0.166736978493721	0.0995994584939842	0.385275411251078	0.0408837742656336	7	0.385275411251078
759	NEW YORK TIMES	The New York Times	Newspaper		NA	February 25, 2015	2015	2	38	BRUSSELS -- Eurozone finance ministers on Tuesd	1	0	1	1	1	TRUE	major_paper	NYTIMES.COM	-0.5469	0.200085482473275	0.144457527072322	0.0285674543103872	0.312488452665995	0.0056896709349081	0.0038995376027431	0.0153594995928733	0.289452375347496	4	0.312488452665995
760	NEW YORK TIMES	The New York Times	NA		NA	January 4, 1997	1997	1	253	DATELINE: NEWARK Hui Sook Kim and his wife, Li	1	0	1	1	1	TRUE	major_paper	NYTIMES.COM	-0.5469	0.0170588630703413	0.438670281773048	0.040397533427141	0.0224359069691896	0.201378463946842	0.0675689486093634	0.198122471484019	0.0143675307200552	2	0.438670281773048
761	NEW YORK TIMES	The New York Times	News		NA	July 5, 2016	2016	7	31	HIGHLIGHT: We spend a lot of time trying to di	0	0	0	1	1	TRUE	major_paper	NYTIMES.COM	-0.5469	0.517938326750001	0.0113620325004586	0.00394532605473251	0.0251898506769636	0.0101917866189492	0.0393517172635211	0.386014832731397	0.00600612740397733	1	0.517938326750001
762	NEW YORK TIMES	The New York Times	Series	Section A	NA	September 29, 1995	1995	9	285	DATELINE: WASHINGTON, Sept. 28 For decades, l	1	0	1	1	1	TRUE	major_paper	NYTIMES.COM	-0.5469	0.15847332826874	0.0686078252424997	0.0123505683771404	0.0707635924292126	0.0405851233924119	0.00453283141035953	0.0921050737129336	0.552581657166702	8	0.552581657166702
763	NEW YORK TIMES	The New York Times	Newspaper	Section A	NA	February 25, 2014	2014	2	50	A three-year parlor game has been taking place	1	0	1	1	1	TRUE	major_paper	NYTIMES.COM	-0.5469	0.0481580200757842	0.282997130185991	0.00416827556894774	0.0339873656519239	0.0195035590243083	0.0286784505766263	0.579543552649416	0.00296364626700299	7	0.579543552649416
764	NEW YORK TIMES	The New York Times	NA	Section C	NA	December 21, 1994	1994	12	300	GOLDIE KEY, a retired nurse who lives in Greenwi	1	0	1	1	1	TRUE	major_paper	NYTIMES.COM	-0.5469	0.00666986250672089	0.109125156263939	0.0933257609560441	0.0643576514919009	0.0421160834638492	0.290375289340025	0.389599039849192	0.00443115612832854	7	0.389599039849192
765	NEW YORK TIMES	The New York Times	Newspaper	Section A	NA	November 16, 2016	2016	11	35	Gregory Manson has moved so many times that he s	1	0	1	1	1	TRUE	major_paper	NYTIMES.COM	-0.5469	0.00310716683717965	0.0285437986262664	0.0208647465155973	0.00914318583183457	0.0363362926889251	0.647337942732335	0.254049518881741	0.000617347886120885	6	0.647337942732335
766	NEW YORK TIMES	The New York Times	NA	Section A	NA	January 31, 1994	1994	1	289	DATELINE: LOS ANGELES, Jan. 30 Federal agents	1	0	1	1	1	TRUE	major_paper	NYTIMES.COM	-0.5469	0.00742246030764138	0.710336145562458	0.0608837674021762	0.0216301465637812	0.126083333429938	0.027993653818787	0.0269018469701028	0.0187486459451151	2	0.710336145562458
767	NEW YORK TIMES	The New York Times	Newspaper	Section A	NA	December 19, 2005	2005	12	168	DATELINE: WASHINGTON, Dec. 18 Meeting in a ma	1	0	1	1	1	TRUE	major_paper	NYTIMES.COM	-0.5469	0.132414252506948	0.062094072185049	0.00735595022140298	0.0238596219714391	0.0271162600233033	0.00788445350843851	0.0299987008110777	0.709276688772341	8	0.709276688772341
768	NEW YORK TIMES	The New York Times	Newspaper	Section A	NA	April 26, 2008	2008	4	124	DATELINE: WASHINGTON Congressional negotiators	1	0	1	1	1	TRUE	major_paper	NYTIMES.COM	-0.5469	0.021834843461718	0.0266995640731442	0.0259667345334733	0.0841922253889067	0.00406768489639649	0.00870800562663581	0.0326136465752581	0.795917295444467	8	0.795917295444467
769	NEW YORK TIMES	The New York Times	NA		NA	March 12, 1999	1999	3	231	DATELINE: WASHINGTON, March 11 J. Dennis Hast	1	0	1	1	1	TRUE	major_paper	NYTIMES.COM	-0.5469	0.492328532417035	0.0104602356998882	0.0232015928416208	0.0387835112264084	0.00214180983211097	0.00601334082575339	0.217331027184515	0.209739949972669	1	0.492328532417035
770	NEW YORK TIMES	The New York Times	Newspaper	Section A	NA	October 29, 2010	2010	10	106	In the midst of a legislative fight over taxing	1	0	1	1	1	TRUE	major_paper	NYTIMES.COM	-0.5469	0.121308505914609	0.247614702283687	0.00955026005383943	0.127923039367994	0.0310681685233451	0.0141751998603527	0.422815905364677	0.0255442186314955	7	0.422815905364677
771	NEW YORK TIMES	The New York Times	Newspaper	Section A	NA	December 18, 2009	2009	12	120	COOKBOOK TROVE Goes to N.Y.U. Rozanne Gold, an	1	0	1	1	1	TRUE	major_paper	NYTIMES.COM	-0.5469	0.0194719375655272	0.306940695455997	0.0357988557622393	0.0203562104657598	0.0618763785810636	0.185855913168158	0.362963685872254	0.00673632312900145	7	0.362963685872254
772	NEW YORK TIMES	The New York Times	Newspaper	Section ED	NA	April 12, 2015	2015	4	40	Ana Barros grew up in a two-family house built	1	0	1	1	1	TRUE	major_paper	NYTIMES.COM	-0.5469	0.0491357367337417	0.0986914854635244	0.0488924061184117	0.233120881634395	0.0365467294541838	0.130644312300199	0.396520821920091	0.00644762637545336	7	0.396520821920091
773	NEW YORK TIMES	The New York Times	Editorial	Section A	NA	April 8, 2014	2014	4	52	There's something ridiculous about the life of a	1	0	1	1	1	TRUE	major_paper	NYTIMES.COM	-0.5469	0.0179381485168794	0.241682264941449	0.014138842742284	0.0306124748093032	0.119612589192076	0.0813385485082271	0.39272320527415	0.101953926015631	7	0.39272320527415
774	NEW YORK TIMES	The New York Times	NA	Section 1	NA	April 18, 1999	1999	4	232	DATELINE: WASHINGTON, April 17 Congress tells	1	0	1	1	1	TRUE	major_paper	NYTIMES.COM	-0.5469	0.152206088104302	0.0164763463153026	0.0114779846851766	0.0413992017938351	0.00254244805388105	0.00443038278839851	0.199482209959389	0.571985338299716	8	0.571985338299716
775	NEW YORK TIMES	The New York Times	NA	Section 1	NA	August 4, 1996	1996	8	272	For generations, Americans accepted the idea th	1	0	1	1	1	TRUE	major_paper	NYTIMES.COM	-0.5469	0.0923479353443954	0.0262597787607957	0.452944336236472	0.09704089781498	0.00646448780206698	0.0416819824559299	0.230588992853413	0.0526715887319474	3	0.452944336236472
776	NEW YORK TIMES	The New York Times	News	US	NA	May 22, 2017	2017	5	17	HIGHLIGHT: The package calls for spending more	1	0	1	1	1	TRUE	major_paper	NYTIMES.COM	-0.5469	0.30300783216241	0.0224443168277515	0.0613900929265147	0.0526709736026234	0.00202432432441275	0.0115000611475278	0.0689873990457366	0.477974999963023	8	0.477974999963023
777	NEW YORK TIMES	The New York Times	Newspaper		NA	May 7, 2015	2015	5	41	James Baker was pedaling to work along a slick,	1	0	1	1	1	TRUE	major_paper	NYTIMES.COM	-0.5469	0.0203158132399513	0.0495434008337018	0.0443844119601031	0.364438220420085	0.12053861418272	0.268536858049154	0.129088811394653	0.00315386991963134	4	0.364438220420085
778	NEW YORK TIMES	The New York Times	Letter	Section SR	NA	February 21, 2016	2016	2	26	Why many millennials are attracted to Bernie Sa	1	0	1	1	1	TRUE	major_paper	NYTIMES.COM	-0.5469	0.14729005962008	0.0189617910474966	0.0677724952929154	0.470474514034637	0.0177269726500332	0.0369983494160177	0.227888285482445	0.0128875324563755	4	0.470474514034637
779	NEW YORK TIMES	The New York Times	NA	Section B	NA	November 24, 1992	1992	11	323	Behind five unmarked doors at the Bellevue Hosp	1	0	1	1	1	TRUE	major_paper	NYTIMES.COM	-0.5469	0.00417244737368263	0.0656223256472432	0.0224890110332837	0.0398183948522644	0.0294782803752015	0.638913893342772	0.194813317713913	0.00469232966164035	6	0.638913893342772
780	NEW YORK TIMES	The New York Times	Summary	Section A	NA	March 6, 1995	1995	3	279	International A2-9 CHINA'S ECONOMIC 'MISTAKES	1	0	1	1	1	TRUE	major_paper	NYTIMES.COM	-0.5469	0.415682272415419	0.100902217833315	0.030358410196337	0.0773777168575164	0.129916801273321	0.0550671808436535	0.119795881216575	0.070899519363862	1	0.415682272415419
781	NEW YORK TIMES	The New York Times	Letter	Section A	NA	February 5, 1991	1991	2	326	To the Editor: Your series on poverty in Ameri	1	0	1	1	1	TRUE	major_paper	NYTIMES.COM	-0.5469	0.077928770719919	0.0312341324774643	0.341957599953249	0.498876827954634	0.00257621876518767	0.00612145381032672	0.029345973009714	0.0119590233095054	4	0.498876827954634
782	NEW YORK TIMES	The New York Times	News	NA	NA	March 11, 2017	2017	3	15	HIGHLIGHT: Representative Jason Chaffetz of Ut	1	0	1	1	1	TRUE	major_paper	NYTIMES.COM	-0.5469	0.0544135486610841	0.0321908903885307	0.0766700664248896	0.0677626591599988	0.036614947797372	0.433999159881035	0.248759202434093	0.0495895252529974	6	0.433999159881035
783	NEW YORK TIMES	The New York Times	Newspaper	Section A	NA	October 9, 2009	2009	10	118	On any given day, about one in every 10 young ma	1	0	1	1	1	TRUE	major_paper	NYTIMES.COM	-0.5469	0.00886895837798736	0.0945851510453403	0.0716063997255371	0.538283381230107	0.0816049122022935	0.0669124398228057	0.134242949877984	0.00389580771794497	4	0.538283381230107
784	NEW YORK TIMES	The New York Times	Newspaper		NA	August 25, 2016	2016	8	32	ATLANTA -- Demeitrus Williams has heard what Do	1	0	1	1	1	TRUE	major_paper	NYTIMES.COM	-0.5469	0.500426767441104	0.0372643476208331	0.00816125203137935	0.12932364893637	0.0128361687921196	0.0244669251321104	0.282755911769998	0.00476497827608503	1	0.500426767441104
785	NEW YORK TIMES	The New York Times	NA	Section B	NA	October 14, 1992	1992	10	322	Lydia Vera was only in the tenth grade when she	1	0	1	1	1	TRUE	major_paper	NYTIMES.COM	-0.5469	0.00573811487348899	0.105833009118337	0.194627505154914	0.338240416565463	0.00623698154876285	0.175507878957685	0.170956375098238	0.00285971868310978	4	0.338240416565463
786	NEW YORK TIMES	The New York Times	NA	Section 1	NA	February 17, 1991	1991	2	326	DATELINE: WILLIAMSPORT, Pa. Every day Lynn I.	1	0	1	1	1	TRUE	major_paper	NYTIMES.COM	-0.5469	0.0292569112091846	0.240654955326714	0.0678628444714978	0.084157439859074	0.0808374467728911	0.24993167704363	0.243698043661322	0.00360068165568652	6	0.24993167704363
787	NEW YORK TIMES	The New York Times	Letter	Section A	NA	October 5, 2016	2016	10	34	To the Editor: Re ''Limiting Food Stamp Choices	1	0	1	1	1	TRUE	major_paper	NYTIMES.COM	-0.5469	0.0455107886793751	0.0385817957730907	0.427146667262608	0.300611683297489	0.00336258554662736	0.0308608834481272	0.108065450857888	0.0458601451347948	3	0.427146667262608
788	NEW YORK TIMES	The New York Times	Letter	Section A	NA	June 30, 1992	1992	6	318	To the Editor: "End the Free Ride for Driving t	1	0	1	1	1	TRUE	major_paper	NYTIMES.COM	-0.5469	0.0336865966044094	0.1311957837694	0.0365138531777674	0.276909274296263	0.102565821642776	0.136582253316051	0.198115355867104	0.0844310613262282	4	0.276909274296263
789	NEW YORK TIMES	The New York Times	Newspaper	Section A	NA	January 22, 2014	2014	1	49	WASHINGTON -- Late last year, staff members at t	1	0	1	1	1	TRUE	major_paper	NYTIMES.COM	-0.5469	0.007826233925131	0.132851450050008	0.232893580692411	0.167747883621572	0.00358280230510392	0.113602675846705	0.0429924281647197	0.29850294539435	8	0.29850294539435
790	NEW YORK TIMES	The New York Times	Newspaper	Section A	NA	January 8, 2014	2014	1	49	Neighborhood streets were once impromptu meeting	1	0	1	1	1	TRUE	major_paper	NYTIMES.COM	-0.5469	0.00202227759235384	0.0217061147278555	0.0462710338936397	0.0134782891574262	0.0035053551845509	0.792368589819104	0.11999299817373	0.000655341451338932	6	0.792368589819104
791	NEW YORK TIMES	The New York Times	Newspaper	Section A	NA	April 2, 2016	2016	4	28	WASHINGTON -- Hundreds of thousands of people co	1	1	1	1	1	TRUE	major_paper	NYTIMES.COM	-0.5469	0.0188312660607647	0.0770842970708719	0.632185224916724	0.226292092577584	0.0015831654704658	0.00752756415098397	0.00951059194986039	0.0269857978027454	3	0.632185224916724
792	NEW YORK TIMES	The New York Times	NA	Section B	NA	December 15, 1994	1994	12	300	After several stormy meetings, Deputy Mayor Fran	1	0	1	1	1	TRUE	major_paper	NYTIMES.COM	-0.5469	0.0796530280249287	0.434769942416253	0.187854377089613	0.0200751437408719	0.0136545906630279	0.136758813778579	0.0796576142631104	0.0475764900236165	2	0.434769942416253
793	NEW YORK TIMES	The New York Times	Newspaper	Section A	NA	June 25, 2001	2001	6	210	The letter from New York City to welfare vetera	1	0	1	1	1	TRUE	major_paper	NYTIMES.COM	-0.5469	0.00376157025084387	0.0920124292850087	0.316140335654164	0.0473638276061125	0.0105792510391933	0.31884314824273	0.206225292512028	0.00507414540991954	6	0.31884314824273
794	NEW YORK TIMES	The New York Times	Newspaper	Section B	NA	April 4, 2014	2014	4	52	BOSTON -- Abe Gorelick has decades of marketing	1	0	1	1	1	TRUE	major_paper	NYTIMES.COM	-0.5469	0.0707151179527649	0.072451732264746	0.117615812951968	0.42816260132323	0.00462235664748053	0.0817413084392112	0.201616584427213	0.0230744859933865	4	0.42816260132323
795	NEW YORK TIMES	The New York Times	Newspaper	Section	NA	February 10, 2009	2009	2	110	DATELINE: WASHINGTON To rally support for his	1	0	1	1	1	TRUE	major_paper	NYTIMES.COM	-0.5469	0.230200375075331	0.240670478086253	0.00833332511572109	0.139372398904161	0.00915417799842892	0.00451405998928609	0.0596182760980098	0.308136908732809	8	0.308136908732809
796	NEW YORK TIMES	The New York Times	Letter	Section	NA	August 22, 2010	2010	8	104	To the Editor: In the Aug. 7 editorial ''Congre	1	0	1	1	1	TRUE	major_paper	NYTIMES.COM	-0.5469	0.166495700905348	0.0911706356285629	0.0968829081764442	0.0692931920644589	0.03995933607595	0.00840253865388717	0.034354944319646	0.493440744175703	8	0.493440744175703
797	NEW YORK TIMES	The New York Times	Newspaper	Section A	NA	February 8, 2009	2009	2	110	DATELINE: WASHINGTON The Senate agreement on	1	0	1	1	1	TRUE	major_paper	NYTIMES.COM	-0.5469	0.195670945122922	0.00980912746601488	0.0123857260412729	0.110574797789192	0.00123035120379004	0.000834409446551045	0.0213531446170522	0.648141498313205	8	0.648141498313205
798	NEW YORK TIMES	The New York Times	Newspaper	Section A	NA	October 15, 2010	2010	10	106	To the clatter, pedestrian obstacle course and s	1	0	1	1	1	TRUE	major_paper	NYTIMES.COM	-0.5469	0.00855071221164431	0.144756861103371	0.0144942513489322	0.0118723983801055	0.149403890245827	0.425982636292877	0.237306768782737	0.00763248163450632	6	0.425982636292877
799	NEW YORK TIMES	The New York Times	NA	Section 1	NA	July 3, 1994	1994	7	295	One month after Mayor Rudolph W. Giuliani aband	1	0	1	1	1	TRUE	major_paper	NYTIMES.COM	-0.5469	0.00559484143867738	0.391151629176068	0.228175355440859	0.0320743707181642	0.00753946724115848	0.229736537347624	0.0625904261961637	0.0431373724412846	2	0.391151629176068
800	NEW YORK TIMES	The New York Times	NA		NA	December 17, 1995	1995	12	288	The following interactive encyclopedia entry lo	1	0	1	1	1	TRUE	major_paper	NYTIMES.COM	-0.5469	0.153352580959733	0.0238096336425488	0.425723827882861	0.15957019393467	0.017656833270517	0.0858060153071477	0.110879942248977	0.0232009727535462	3	0.425723827882861
801	NEW YORK TIMES	The New York Times	Letter		NA	November 14, 2010	2010	11	107	Momism may be a ''clever strategy in a season of	1	0	1	1	1	TRUE	major_paper	NYTIMES.COM	-0.5469	0.162096139322891	0.0477636849898145	0.170673747116822	0.179500096157508	0.00761465027135364	0.104235456593048	0.316110736123804	0.0120054894247584	7	0.316110736123804
802	NEW YORK TIMES	The New York Times	NA	Section A	NA	June 15, 2000	2000	6	222	Mayor Rudolph W. Giuliani announced a health in	1	0	1	1	1	TRUE	major_paper	NYTIMES.COM	-0.5469	0.106639347782161	0.327779659263552	0.328808861043054	0.0336110865850783	0.0097840715277274	0.022522954741349	0.145441358372657	0.0254126606844216	3	0.328808861043054
803	NEW YORK TIMES	The New York Times	Newspaper	Section	NA	April 14, 2014	2014	4	52	WASHINGTON -- The federal building in Washington	1	0	1	1	1	TRUE	major_paper	NYTIMES.COM	-0.5469	0.57495818143116	0.0551734624508875	0.0500359879276781	0.0828349939703834	0.0460072637858083	0.0176314885446085	0.0894591598309027	0.0838994620585717	1	0.57495818143116
804	NEW YORK TIMES	The New York Times	Editorial	Section A	NA	September 14, 2005	2005	9	165	President Bush's vow to speed welfare assistance	1	0	1	1	1	TRUE	major_paper	NYTIMES.COM	-0.5469	0.177261989474293	0.0425938874307023	0.195529293637414	0.0410454192782019	0.0178387319338574	0.0397862167619117	0.0516343415689146	0.434310119914706	8	0.434310119914706
805	NEW YORK TIMES	The New York Times	Biography		NA	December 6, 1994	1994	12	300	DATELINE: WASHINGTON, Dec. 5 Here is how Newt	1	0	1	1	1	TRUE	major_paper	NYTIMES.COM	-0.5469	0.420450971554084	0.039659876233489	0.0453786972197979	0.0451950295561963	0.0818255496316928	0.0797262836135357	0.170699629145545	0.117063963045659	1	0.420450971554084
806	NEW YORK TIMES	The New York Times	NA	Section A	NA	December 15, 1994	1994	12	300	Americans say they now trust the Republicans in	1	0	1	1	1	TRUE	major_paper	NYTIMES.COM	-0.5469	0.258880337015025	0.0606680105720141	0.185176773713806	0.167765618192306	0.00513737609373373	0.0394653465116575	0.177184403180861	0.105722134720597	1	0.258880337015025
807	NEW YORK TIMES	The New York Times	Newspaper	Section A	NA	January 2, 2009	2009	1	109	A while before his nominations for the Nobel Pea	1	0	1	1	1	TRUE	major_paper	NYTIMES.COM	-0.5469	0.0885340310480293	0.034299881412459	0.020291223698404	0.0197491423657354	0.017374844010921	0.653194619842429	0.163732465237247	0.00282379238477417	6	0.653194619842429
808	NEW YORK TIMES	The New York Times	Newspaper	Section A	NA	June 11, 2015	2015	6	42	BALTIMORE -- Dominick Torrence, who has lived i	1	0	1	1	1	TRUE	major_paper	NYTIMES.COM	-0.5469	0.0314740133680424	0.433475922196623	0.0600067314377235	0.091088938026628	0.174587764904546	0.0542355690477483	0.143179381288929	0.0119516797297603	2	0.433475922196623
809	NEW YORK TIMES	The New York Times	News Analysis		NA	September 24, 1992	1992	9	321	DATELINE: WASHINGTON, Sept. 23 Today, Preside	1	0	1	1	1	TRUE	major_paper	NYTIMES.COM	-0.5469	0.130467723915835	0.0126995390177126	0.0513151243966624	0.17405130965221	0.00326278031703961	0.00315488586831185	0.056272592285838	0.568776044546391	8	0.568776044546391
810	NEW YORK TIMES	The New York Times	NA		NA	January 13, 1991	1991	1	325	In Chicago the fates have avenged themselves on	1	0	1	1	1	TRUE	major_paper	NYTIMES.COM	-0.5469	0.0370122288077305	0.0683671198253883	0.0390139285910203	0.0569232867095762	0.221352974172963	0.279133559485433	0.295304617712621	0.00289228469526807	7	0.295304617712621
811	NEW YORK TIMES	The New York Times	NA		NA	December 25, 1995	1995	12	288	Christmas will be sweet this year for Faith Bow	1	0	1	1	1	TRUE	major_paper	NYTIMES.COM	-0.5469	0.00354345880524354	0.0361458226714568	0.028906504041828	0.00699741766885575	0.0348005921737157	0.619612955684261	0.26883307945517	0.00116016949946909	6	0.619612955684261
812	NEW YORK TIMES	The New York Times	Newspaper	Section A	NA	April 9, 2014	2014	4	52	WASHINGTON -- Democrats, trying to recast the m	1	0	1	1	1	TRUE	major_paper	NYTIMES.COM	-0.5469	0.542582629765476	0.0127387550228513	0.0140648742570499	0.210390043639995	0.00238996330385419	0.00299650446348349	0.0678742036873343	0.146963025859955	1	0.542582629765476
813	NEW YORK TIMES	The New York Times	Review	Section C	NA	March 25, 2009	2009	3	111	LAND OF THE LOST SOULS My Life on the Streets	1	0	1	1	1	TRUE	major_paper	NYTIMES.COM	-0.5469	0.0109281808776129	0.0293267494799587	0.00339784040609264	0.0167362469074156	0.0578161524721371	0.182790562536399	0.697996590798836	0.0010076765215479	7	0.697996590798836
814	NEW YORK TIMES	The New York Times	Newspaper	Section A	NA	April 17, 2006	2006	4	148	The Bloomberg administration, in a significant	1	0	1	1	1	TRUE	major_paper	NYTIMES.COM	-0.5469	0.0139261551265125	0.369930693537474	0.475395884331572	0.109306262489701	0.00242681804636877	0.0105025486441027	0.0103156656479579	0.00819597217631078	3	0.475395884331572
815	NEW YORK TIMES	The New York Times	NA		NA	March 26, 1999	1999	3	231	Marilyn Vasquez quickly dismisses the notion th	1	0	1	1	1	TRUE	major_paper	NYTIMES.COM	-0.5469	0.00785933849111143	0.456932242267747	0.0866265778851864	0.299910940578288	0.0110000473957499	0.0219259933415891	0.0681859132059854	0.0475589468343421	2	0.456932242267747
816	NEW YORK TIMES	The New York Times	Newspaper	Section A	NA	December 24, 2010	2010	12	108	Around 4 p.m. on Oct. 24 of last year, Cynthia	1	0	1	1	1	TRUE	major_paper	NYTIMES.COM	-0.5469	0.00595172253648625	0.251126545549847	0.00267567000652928	0.00669095405613141	0.267839374611805	0.129180173692759	0.335674976713474	0.000860582832968615	7	0.335674976713474
817	NEW YORK TIMES	The New York Times	Op-Ed		NA	December 22, 1995	1995	12	288	DATELINE: BOSTON The conflict between Congress	1	0	1	1	1	TRUE	major_paper	NYTIMES.COM	-0.5469	0.222155899268859	0.0127500282597334	0.323856372636118	0.134540244233788	0.00129554793472005	0.0153396502177185	0.109928033539193	0.18013422390987	3	0.323856372636118
818	NEW YORK TIMES	The New York Times	Newspaper	Section A	NA	April 2, 2015	2015	4	40	DENVER -- In the State Capitol, they are callin	1	0	1	1	1	TRUE	major_paper	NYTIMES.COM	-0.5469	0.0746183127783729	0.276720428863016	0.0389023317341781	0.0655501250091461	0.171401220319623	0.00989605815654683	0.122187332662942	0.240724190476176	2	0.276720428863016
819	NEW YORK TIMES	The New York Times	Newspaper	Section A	NA	December 18, 2011	2011	12	96	Mary Rodriguez, a diabetic widow, greeted a visi	1	0	1	1	1	TRUE	major_paper	NYTIMES.COM	-0.5469	0.00337720286462051	0.0447651506106713	0.0207894858176174	0.00741038637893313	0.0143930821382992	0.749630749621009	0.158707135804718	0.000926806764131649	6	0.749630749621009
820	NEW YORK TIMES	The New York Times	Editorial	Section A	NA	November 26, 2011	2011	11	95	Something akin to justice may finally be at hand	1	0	1	1	1	TRUE	major_paper	NYTIMES.COM	-0.5469	0.0175747507473638	0.272263788695014	0.265544298701222	0.129738048676631	0.0130815682009847	0.121352574062908	0.0388755949882856	0.141569375927591	2	0.272263788695014
821	NEW YORK TIMES	The New York Times	NA	Section 1	NA	September 11, 1994	1994	9	297	DATELINE: WASHINGTON, Sept. 10 Secret Service	1	0	1	1	1	TRUE	major_paper	NYTIMES.COM	-0.5469	0.0129926563837594	0.666323899976156	0.106686736125752	0.0146701592639242	0.134115372181129	0.00978864090655069	0.0123704290764906	0.0430521060862385	2	0.666323899976156
822	NEW YORK TIMES	The New York Times	Editorial	Section 4	NA	October 22, 1995	1995	10	286	How touching it was for House Speaker Newt Gingr	1	0	1	1	1	TRUE	major_paper	NYTIMES.COM	-0.5469	0.214253087173452	0.00642871610819341	0.0428574523730625	0.225808780762185	0.000850595789748847	0.00270643662947516	0.0432993373213907	0.463795593842493	8	0.463795593842493
823	NEW YORK TIMES	The New York Times	Newspaper	Section B	NA	October 10, 2016	2016	10	34	LONDON -- As Europe has grappled with the traum	1	0	1	1	1	TRUE	major_paper	NYTIMES.COM	-0.5469	0.323090076915629	0.0350397047943264	0.00961342952370232	0.346082657366081	0.00984709401413262	0.00317152676151049	0.0495001906691105	0.223655319955507	4	0.346082657366081
824	NEW YORK TIMES	The New York Times	Newspaper	Section A	NA	January 7, 2014	2014	1	49	Poor people with diabetes are significantly more	1	0	1	1	1	TRUE	major_paper	NYTIMES.COM	-0.5469	0.0352929900112837	0.0973139220619655	0.129017325722379	0.409164552356325	0.00947962419711534	0.18224341935588	0.0466246202565157	0.0908635460385356	4	0.409164552356325
825	NEW YORK TIMES	The New York Times	NA	Section 1	NA	July 6, 1997	1997	7	259	DATELINE: WASHINGTON, July 5, President Clinto	1	0	1	1	1	TRUE	major_paper	NYTIMES.COM	-0.5469	0.110177688231019	0.0761132208816215	0.503995661652558	0.206442476335078	0.00415660832639519	0.0136574892025869	0.0271912171516499	0.0582656382190911	3	0.503995661652558
826	NEW YORK TIMES	The New York Times	NA		NA	April 10, 1999	1999	4	232	DATELINE: BRIDGEPORT A Fairfield couple convic	1	0	1	1	1	TRUE	major_paper	NYTIMES.COM	-0.5469	0.00789489458602977	0.39445382599516	0.197508523354421	0.0264439582901889	0.154335413115332	0.154138108692229	0.0592176616325865	0.0060076143340531	2	0.39445382599516
827	NEW YORK TIMES	The New York Times	Newspaper	Section A	NA	October 25, 2005	2005	10	166	DATELINE: COLORADO CITY, Ariz., Oct. 19 One y	1	0	1	1	1	TRUE	major_paper	NYTIMES.COM	-0.5469	0.0505305996608683	0.282368412118119	0.0156627159333839	0.0257598194671865	0.25580889572046	0.169759043766881	0.197257788302487	0.00285272503061438	2	0.282368412118119
828	NEW YORK TIMES	The New York Times	NA		NA	September 10, 1992	1992	9	321	DATELINE: WASHINGTON, Sept. 9 Those Congressio	1	0	1	1	1	TRUE	major_paper	NYTIMES.COM	-0.5469	0.224045475538982	0.0213610445442506	0.0155116980765821	0.0231835730195534	0.0102458300390819	0.00581937261030748	0.217571202712014	0.482261803459228	8	0.482261803459228
829	NEW YORK TIMES	The New York Times	Newspaper	Section B	NA	January 25, 2007	2007	1	133	Stephanie Robinson Davis and Randy Davis are yo	1	0	1	1	1	TRUE	major_paper	NYTIMES.COM	-0.5469	0.00163303063498143	0.0131455677573485	0.0306996448204539	0.00499956500544503	0.00588703838555131	0.812353441753105	0.130862669796037	0.000419041847078381	6	0.812353441753105
830	NEW YORK TIMES	The New York Times	Editorial	Section A	NA	May 17, 1996	1996	5	269	Ellen Haas, the Under Secretary of Agriculture i	1	0	1	1	1	TRUE	major_paper	NYTIMES.COM	-0.5469	0.587942476466582	0.111063430440365	0.0279739773968298	0.0395033609597795	0.0232612906618543	0.00488698271216175	0.0502239818069228	0.155144499555505	1	0.587942476466582
831	NEW YORK TIMES	The New York Times	NA	Section A	NA	December 16, 1993	1993	12	312	Transition advisers to Mayor-elect Rudolph W. G	1	0	1	1	1	TRUE	major_paper	NYTIMES.COM	-0.5469	0.0982201308729693	0.416463119747028	0.113929236342809	0.0335699743787012	0.0388190226546136	0.0800941723953382	0.108174018133918	0.110730325474624	2	0.416463119747028
832	NEW YORK TIMES	The New York Times	NA		NA	November 23, 2000	2000	11	227	A year ago, Randy Dillard and his five children	1	0	1	1	1	TRUE	major_paper	NYTIMES.COM	-0.5469	0.00189007411144031	0.0516040885848068	0.0281173718957298	0.00503462065132087	0.0114833705847691	0.769072009529097	0.132190421760634	0.000608042882201861	6	0.769072009529097
833	NEW YORK TIMES	The New York Times	Letter	Section A	NA	March 14, 2001	2001	3	207	To the Editor: Re "Seeing Achievement Gains by	1	0	1	1	1	TRUE	major_paper	NYTIMES.COM	-0.5469	0.0665741251134827	0.0320596223369747	0.471006370745655	0.302554333534515	0.00295445336154767	0.0443867181685231	0.0420114858066093	0.0384528909326926	3	0.471006370745655
834	NEW YORK TIMES	The New York Times	Newspaper	Section A	NA	November 29, 2001	2001	11	215	DATELINE: WASHINGTON, Nov. 28 President Bush j	1	0	1	1	1	TRUE	major_paper	NYTIMES.COM	-0.5469	0.225230587926057	0.0109934207882289	0.0161130575776077	0.0280466721818694	0.00257778647798863	0.00441511395515879	0.0658459470504654	0.646777414042625	8	0.646777414042625
835	NEW YORK TIMES	The New York Times	Editorial	Section A	NA	November 1, 2008	2008	11	131	At a Congressional hearing this week, the mayor	1	0	1	1	1	TRUE	major_paper	NYTIMES.COM	-0.5469	0.0256990757959835	0.194986152924263	0.173769789086532	0.219403288471873	0.010241531666708	0.0109228676028702	0.0377882113446893	0.327189083107081	8	0.327189083107081
836	NEW YORK TIMES	The New York Times	NA		NA	November 2, 1995	1995	11	287	NEWT GINGRICH and Bill Clinton agree: the time f	1	0	1	1	1	TRUE	major_paper	NYTIMES.COM	-0.5469	0.0584235172517569	0.0100193410157759	0.550236100806575	0.173548507927894	0.00117199891767774	0.0314998045525232	0.128452630604318	0.0466480989234796	3	0.550236100806575
837	NEW YORK TIMES	The New York Times	Newspaper	Section A	NA	February 3, 2012	2012	2	74	The first few days of Shelly Berry's life in Ne	1	0	1	1	1	TRUE	major_paper	NYTIMES.COM	-0.5469	0.00179631185320694	0.0180091378003285	0.0205070939317847	0.00783574816682439	0.0111836413576278	0.851695832523693	0.0885797471210382	0.00039248724549623	6	0.851695832523693
838	NEW YORK TIMES	The New York Times	NA		NA	December 28, 1997	1997	12	264	As news goes -- the big single events that chill	1	0	1	1	1	TRUE	major_paper	NYTIMES.COM	-0.5469	0.0480061647028033	0.115050438296755	0.202112041752677	0.186283333569983	0.0125983496721304	0.181048992215816	0.237958552174673	0.016942127615163	7	0.237958552174673
839	NEW YORK TIMES	The New York Times	Editorial	Section A	NA	December 21, 1995	1995	12	288	As budget talks floundered in Washington yesterd	1	0	1	1	1	TRUE	major_paper	NYTIMES.COM	-0.5469	0.411734764645505	0.00692120943100547	0.0223665808064281	0.0137209305780314	0.00227601655350448	0.0109255838151293	0.137499734891191	0.394555179279205	1	0.411734764645505
840	NEW YORK TIMES	The New York Times	Newspaper	Section B	NA	August 9, 2001	2001	8	212	Mark Green and Peter F. Vallone turned their att	1	0	1	1	1	TRUE	major_paper	NYTIMES.COM	-0.5469	0.111080918150484	0.271614359980939	0.280982919308441	0.0550700828525081	0.0545151638719805	0.0668851211671493	0.0244263500380979	0.1354250846304	3	0.280982919308441
841	NEW YORK TIMES	The New York Times	Editorial	Section 4	NA	December 21, 1997	1997	12	264	While delighting in the angels and lights of Roc	1	0	1	1	1	TRUE	major_paper	NYTIMES.COM	-0.5469	0.00330394705089237	0.0323936710260138	0.15358271766693	0.0614692224407952	0.00503670979493224	0.663689256834657	0.0782061427306954	0.00231833245508454	6	0.663689256834657
842	NEW YORK TIMES	The New York Times	Newspaper	Section A	NA	November 15, 2017	2017	11	23	Putting thoughts to paper is the most surefire w	1	0	1	1	1	TRUE	major_paper	NYTIMES.COM	-0.5469	0.0196838966690744	0.037584725816672	0.0175984901013816	0.0276875208590342	0.012791420183881	0.435929487396567	0.446427511859257	0.00229694711413294	7	0.446427511859257
843	NEW YORK TIMES	The New York Times	Newspaper	Section BU	NA	February 1, 2015	2015	2	38	When Larisa Casillas gave birth to a boy two ye	1	0	1	1	1	TRUE	major_paper	NYTIMES.COM	-0.5469	0.0469462354526823	0.0409790477074909	0.273621288550209	0.455379720317376	0.00435248397877314	0.115860797909407	0.0577546473822791	0.00510577870178194	4	0.455379720317376
844	NEW YORK TIMES	The New York Times	Newspaper		NA	October 12, 2016	2016	10	34	What would, say, a half-billion dollars do for	1	0	1	1	1	TRUE	major_paper	NYTIMES.COM	-0.5469	0.146298591569762	0.0167570189191591	0.158137347026803	0.52676803252618	0.00504638107941285	0.0168870160613377	0.0274823647448697	0.102623248072475	4	0.52676803252618
845	NEW YORK TIMES	The New York Times	Newspaper	Section A	NA	July 14, 2015	2015	7	43	Jeb Bush said last week that Americans would ''	1	0	1	1	1	TRUE	major_paper	NYTIMES.COM	-0.5469	0.0828897754853471	0.00762361579930385	0.107647149591482	0.673759067473875	0.000681278959365738	0.00550565399397826	0.0800026202192796	0.0418908384773686	4	0.673759067473875
846	NEW YORK TIMES	The New York Times	NA		NA	May 8, 1997	1997	5	257	DATELINE: EL PASO Even after 15 years of work	1	0	1	1	1	TRUE	major_paper	NYTIMES.COM	-0.5469	0.0609678051132943	0.284236795942413	0.0385837840806065	0.412792482126605	0.0635739811501024	0.00981632033262691	0.107515661097401	0.022513170156952	4	0.412792482126605
847	NEW YORK TIMES	The New York Times	Newspaper	Section A	NA	November 5, 2016	2016	11	35	HERNDON, Va. -- During the 10 hours a day that	1	0	1	1	1	TRUE	major_paper	NYTIMES.COM	-0.5469	0.113845602448132	0.408366393513047	0.0648913796686896	0.0386114338909466	0.0170901936296761	0.105722647486662	0.2415661006074	0.0099062487554462	2	0.408366393513047
848	NEW YORK TIMES	The New York Times	Series	Section A	NA	November 24, 2009	2009	11	119	Sarah Gellert's favorite word is wonderful. Her	1	0	1	1	1	TRUE	major_paper	NYTIMES.COM	-0.5469	0.00907955638990201	0.0199459772765719	0.0577026505848447	0.0409964621111638	0.00588504683699311	0.590502062904736	0.273404155259145	0.00248408863664409	6	0.590502062904736
849	NEW YORK TIMES	The New York Times	Letter	Section A	NA	August 14, 2002	2002	8	200	To the Editor: Re "The City's Hunger Crisis" (e	1	0	1	1	1	TRUE	major_paper	NYTIMES.COM	-0.5469	0.00825766724084775	0.23648847586233	0.439846752188188	0.185548421119854	0.00931468309352657	0.0854562399855522	0.0226615425615398	0.0124262179481616	3	0.439846752188188
850	NEW YORK TIMES	The New York Times	NA		NA	May 18, 1997	1997	5	257	KARL MARX preached it. Last week, Gov. George E	1	0	1	1	1	TRUE	major_paper	NYTIMES.COM	-0.5469	0.177758973624102	0.0291811377015778	0.0231941026609	0.502584659530032	0.0123410169842084	0.101038201637977	0.13398726544972	0.0199146424114826	4	0.502584659530032
851	NEW YORK TIMES	The New York Times	NA	Section 1	NA	May 17, 1997	1997	5	257	Gov. George E. Pataki, whose state has the larg	1	0	1	1	1	TRUE	major_paper	NYTIMES.COM	-0.5469	0.0336611167013182	0.183664339894412	0.557499183268457	0.160340337343798	0.00270561383105947	0.0198393213873615	0.0110584478591294	0.0312316397144646	3	0.557499183268457
852	NEW YORK TIMES	The New York Times	News; Series	Section A	NA	March 17, 2012	2012	3	75	Rick Santorum's prospects for re-election to th	1	0	1	1	1	TRUE	major_paper	NYTIMES.COM	-0.5469	0.679975677647528	0.0257465238124199	0.0221115168279298	0.0475756534998749	0.0155683877573204	0.0740031103341099	0.0965956140504992	0.0384235160703182	1	0.679975677647528
853	NEW YORK TIMES	The New York Times	Letter	Section A	NA	December 22, 1997	1997	12	264	To the Editor: "Study Shows New York Has Great	1	0	1	1	1	TRUE	major_paper	NYTIMES.COM	-0.5469	0.00897314660935647	0.0851695503511285	0.256326976845715	0.317314249167503	0.0208969530983804	0.25346378303218	0.0392052880385416	0.0186500528571951	4	0.317314249167503
854	NEW YORK TIMES	The New York Times	Summary	Section A	NA	February 7, 1997	1997	2	254	INTERNATIONAL A3-19 North Korea to Take Ta	1	0	1	1	1	TRUE	major_paper	NYTIMES.COM	-0.5469	0.280470541266463	0.278267916709453	0.0273407670086517	0.0260394134097731	0.165154280901643	0.0291788377973294	0.0329681269261932	0.160580115980494	1	0.280470541266463
855	NEW YORK TIMES	The New York Times	NA	Section A	NA	March 23, 1994	1994	3	291	DATELINE: CHICAGO, March 22 This city has had	1	0	1	1	1	TRUE	major_paper	NYTIMES.COM	-0.5469	0.0314143172489597	0.335893748641655	0.00921953435869005	0.0488175709423923	0.114596321444636	0.0477372569852329	0.402081205818533	0.0102400445599014	7	0.402081205818533
856	NEW YORK TIMES	The New York Times	Newspaper	Section A	NA	February 1, 2016	2016	2	26	WASHINGTON -- Neither Bernie Sanders nor Donald	1	0	1	1	1	TRUE	major_paper	NYTIMES.COM	-0.5469	0.473844896785574	0.0944595797017855	0.0307565109222804	0.0302758841852382	0.0478447030616716	0.0392491543659632	0.195705397482083	0.0878638734954045	1	0.473844896785574
857	NEW YORK TIMES	The New York Times	Newspaper	Section	NA	August 20, 2016	2016	8	32	POWELLTON, W.Va. -- Deep in the belly of an App	1	0	1	1	1	TRUE	major_paper	NYTIMES.COM	-0.5469	0.284159626628746	0.0366423638968773	0.00277284248256529	0.0677193048993059	0.196407953623836	0.0619918702894341	0.346669110420674	0.00363692775856176	7	0.346669110420674
858	NEW YORK TIMES	The New York Times	News		NA	July 5, 2016	2016	7	31	HIGHLIGHT: Giving a leg up to U.S. workers on	1	0	1	1	1	TRUE	major_paper	NYTIMES.COM	-0.5469	0.05687785346804	0.084349964010272	0.159312026826003	0.47873351099483	0.00695465042635002	0.0679955106300683	0.130954722382117	0.01482176126232	4	0.47873351099483
859	NEW YORK TIMES	The New York Times	Newspaper		NA	March 30, 2009	2009	3	111	DATELINE: ALBANY Concluding the most secretiv	1	0	1	1	1	TRUE	major_paper	NYTIMES.COM	-0.5469	0.0210827480093067	0.215851759158707	0.0366954353287628	0.153622578945975	0.0551710397921097	0.0165745494658032	0.0241234953061414	0.476878393993194	8	0.476878393993194
860	NEW YORK TIMES	The New York Times	Newspaper	Section B	NA	February 14, 2004	2004	2	170	Start with Hollywood -- say, the producers Bob	1	0	1	1	1	TRUE	major_paper	NYTIMES.COM	-0.5469	0.249836663291571	0.0094029108917895	0.0379963011021232	0.336382210342729	0.00369847479953719	0.185450414612356	0.173652450246987	0.00358057471290681	4	0.336382210342729
861	NEW YORK TIMES	The New York Times	Editorial	Section A	NA	May 6, 1992	1992	5	317	As if, after Los Angeles, there were any doubt:	1	0	1	1	1	TRUE	major_paper	NYTIMES.COM	-0.5469	0.126062494484162	0.122834559796895	0.164074271289305	0.393454562363276	0.010343257288354	0.0306694077348287	0.0727631563238593	0.0797982907193184	4	0.393454562363276
862	NEW YORK TIMES	The New York Times	Newspaper	Section A	NA	February 7, 2014	2014	2	50	Nadji Colon never saw snow until he arrived in t	1	0	1	1	1	TRUE	major_paper	NYTIMES.COM	-0.5469	0.00510960186934888	0.154810738426753	0.0227093050816983	0.120803195635682	0.0381937007287567	0.267857368997887	0.382808911589899	0.00770717766997403	7	0.382808911589899
863	NEW YORK TIMES	The New York Times	Newspaper	Section A	NA	November 27, 2008	2008	11	131	Class-action lawsuits, especially the type that	1	0	1	1	1	TRUE	major_paper	NYTIMES.COM	-0.5469	0.0159790933071362	0.272524782458695	0.211400253370799	0.0549904400214951	0.00886245833237368	0.186285996463433	0.225418458601768	0.0245385174442994	2	0.272524782458695
864	NEW YORK TIMES	The New York Times	Newspaper	Section A	NA	December 21, 2010	2010	12	108	It is that time of year when New Yorkers who don	1	0	1	1	1	TRUE	major_paper	NYTIMES.COM	-0.5469	0.0209095037716243	0.0462311241576729	0.00445484260097778	0.028347306274154	0.10370220808836	0.269875683190223	0.524317919543461	0.00216141237352646	7	0.524317919543461
865	NEW YORK TIMES	The New York Times	Editorial	Section A	NA	May 26, 2004	2004	5	173	Somehow, it's hard to imagine the lush, green st	1	0	1	1	1	TRUE	major_paper	NYTIMES.COM	-0.5469	0.0207843833893003	0.174906098928796	0.0299796857195916	0.318818673992579	0.133892916216703	0.0294561745198025	0.267801226555898	0.0243608406773289	4	0.318818673992579
866	NEW YORK TIMES	The New York Times	Newspaper	Section A	NA	February 8, 2014	2014	2	50	EAST LANSING, Mich. -- President Obama signed t	1	0	1	1	1	TRUE	major_paper	NYTIMES.COM	-0.5469	0.153339238988945	0.0703274076418167	0.0602605681121854	0.256024847941938	0.00933266976086783	0.0240826424821543	0.0964308422974222	0.33020178277467	8	0.33020178277467
867	NEW YORK TIMES	The New York Times	Op-Ed		NA	July 4, 2017	2017	7	19	HIGHLIGHT: Advocates for reforms or better gov	1	0	1	1	1	TRUE	major_paper	NYTIMES.COM	-0.5469	0.472638186939816	0.054763643209882	0.111145772045764	0.0187374984514402	0.00948737091985717	0.0371146970867652	0.239239395860117	0.056873435486359	1	0.472638186939816
868	NEW YORK TIMES	The New York Times	NA	Section A	NA	July 12, 1996	1996	7	271	DATELINE: WASHINGTON, July 11 At Bob Dole's ur	1	0	1	1	1	TRUE	major_paper	NYTIMES.COM	-0.5469	0.279385327229618	0.00935828893118238	0.28765291223906	0.0126646087700102	0.000663297224846893	0.00301063992220648	0.0196734386765702	0.387591487006506	8	0.387591487006506
869	NEW YORK TIMES	The New York Times	Newspaper	Section 10	NA	July 31, 2005	2005	7	163	BALANCING life and work is like riding a teeter-	1	0	1	1	1	TRUE	major_paper	NYTIMES.COM	-0.5469	0.00426164882196085	0.0159131208751638	0.0197717119822169	0.0186960031671088	0.00880358544946031	0.526829074125804	0.404303914322039	0.00142094125624585	6	0.526829074125804
870	NEW YORK TIMES	The New York Times	NA	Section 13	NA	December 25, 1994	1994	12	300	DAY after day, for two summers and three winter	1	0	1	1	1	TRUE	major_paper	NYTIMES.COM	-0.5469	0.00401650888867588	0.0252019557049888	0.00474273827623553	0.008671537778262	0.0829219023510993	0.326084239530741	0.547764423740117	0.000596693729880931	7	0.547764423740117
871	NEW YORK TIMES	The New York Times	Newspaper		NA	January 16, 2001	2001	1	205	As the last academic year was drawing to a close	1	0	1	1	1	TRUE	major_paper	NYTIMES.COM	-0.5469	0.00279634071349582	0.0899496086289129	0.0427990302244497	0.0142305366419071	0.0232665586692458	0.693102359263731	0.132742653945437	0.00111291191282076	6	0.693102359263731
872	NEW YORK TIMES	The New York Times	Newspaper	Section A	NA	January 10, 2014	2014	1	49	Twenty-three years ago, in a hospital maternity	1	0	1	1	1	TRUE	major_paper	NYTIMES.COM	-0.5469	0.0195977629142674	0.0272979179820707	0.0288207405380882	0.00861366978792129	0.0058822667469376	0.862912497470781	0.0456664088124945	0.00120873574743947	6	0.862912497470781
873	NEW YORK TIMES	The New York Times	NA	Section A	NA	April 15, 1997	1997	4	256	DATELINE: WASHINGTON, April 14 Several thousan	1	0	1	1	1	TRUE	major_paper	NYTIMES.COM	-0.5469	0.309661092101297	0.177081032699655	0.265062695875581	0.00958044141452697	0.0285418021292684	0.0454992466495445	0.0254047362943008	0.139168952835825	1	0.309661092101297
874	NEW YORK TIMES	The New York Times	Newspaper	Section A	NA	January 17, 2016	2016	1	25	She called them her four M&M's: Meghan and Mish	1	0	1	1	1	TRUE	major_paper	NYTIMES.COM	-0.5469	0.00411222337639229	0.0155742722043622	0.0350395348979915	0.0160609131697435	0.0216550116750606	0.611710662834793	0.294927908802077	0.00091947303957941	6	0.611710662834793
875	NEW YORK TIMES	The New York Times	Op-Ed	Section SR	NA	September 18, 2016	2016	9	33	SHOULD the goal of public policy be to ensure t	1	0	1	1	1	TRUE	major_paper	NYTIMES.COM	-0.5469	0.0992982359362859	0.029187327200419	0.197758069628751	0.57801109938333	0.000870085167490586	0.00611000989383984	0.0206057284422412	0.0681594443476428	4	0.57801109938333
876	NEW YORK TIMES	The New York Times	Series		NA	May 10, 1997	1997	5	257	Two years ago, the Federal Government sponsored	1	0	1	1	1	TRUE	major_paper	NYTIMES.COM	-0.5469	0.0480351879465092	0.139636628636848	0.358918857137399	0.0352014361476828	0.00383108938646648	0.175979745283353	0.108049928534653	0.130347126927088	3	0.358918857137399
877	NEW YORK TIMES	The New York Times	Newspaper	Section MM	NA	October 23, 2016	2016	10	34	On his first day on the job in the Seattle Poli	1	0	1	1	1	TRUE	major_paper	NYTIMES.COM	-0.5469	0.0497148069804494	0.325517336398778	0.0188052682770642	0.0360252011627314	0.151482690575452	0.0292835625028333	0.379296335496289	0.0098747986064032	7	0.379296335496289
878	NEW YORK TIMES	The New York Times	News	NYREGION LENGTH: 1067 words HIGHLIGHT: The measure, which also covers paper bags, is intended to reduce their use	NA	May 5, 2016	2016	5	29	HIGHLIGHT: The measure, which also covers pape	1	0	1	1	1	TRUE	major_paper	NYTIMES.COM	-0.5469	0.0558648737152488	0.375034798235369	0.00897643065357214	0.0240117885160525	0.0238985383995667	0.0401367754632667	0.263456518998497	0.208620276018427	2	0.375034798235369
879	NEW YORK TIMES	The New York Times	NA	Section A	NA	January 23, 1991	1991	1	325	DATELINE: LANSING, Mich., Jan. 22 Michigan le	1	0	1	1	1	TRUE	major_paper	NYTIMES.COM	-0.5469	0.0243555871181735	0.0265501812380566	0.454676004349203	0.125388193171462	0.0165628196701673	0.0219065928221049	0.0332557284885159	0.297304893142317	3	0.454676004349203
880	NEW YORK TIMES	The New York Times	NA		NA	December 26, 1999	1999	12	240	During winter's colder months, eligible individu	1	0	1	1	1	TRUE	major_paper	NYTIMES.COM	-0.5469	0.00506921996006451	0.191557506854169	0.583172987934122	0.0378773759274875	0.00749977824501621	0.143020950196488	0.0179589322754088	0.0138432486072442	3	0.583172987934122
881	NEW YORK TIMES	The New York Times	NA	Section A	NA	November 5, 1999	1999	11	239	DATELINE: WASHINGTON, Nov. 4 Ever since he be	1	0	1	1	1	TRUE	major_paper	NYTIMES.COM	-0.5469	0.622281593015425	0.023841550870674	0.019122698562605	0.0187705383653122	0.0150004973937798	0.0214954810233207	0.247304847237774	0.0321827935311094	1	0.622281593015425
882	NEW YORK TIMES	The New York Times	NA	Section 1	NA	October 29, 1995	1995	10	286	DATELINE: WASHINGTON, Oct. 28 Hours after the	0	0	0	1	1	TRUE	major_paper	NYTIMES.COM	-0.5469	0.303299412314596	0.00433523002900791	0.0861004788695392	0.0171979037494494	0.000651202865312399	0.00405250419447978	0.103853048542195	0.480510219435421	8	0.480510219435421
883	NEW YORK TIMES	The New York Times	Summary	Section A	NA	March 30, 1999	1999	3	231	INTERNATIONAL A3-12 NATO Shifts Air Assaul	1	0	1	1	1	TRUE	major_paper	NYTIMES.COM	-0.5469	0.219607453786913	0.381242048462668	0.014293434962788	0.0285740465938443	0.22090551700869	0.0725754741308856	0.0243017457085685	0.0385002793456425	2	0.381242048462668
884	NEW YORK TIMES	The New York Times	Editorial	Section A	NA	December 6, 2005	2005	12	168	Q. When is a self-proclaimed moderate Republican	1	0	1	1	1	TRUE	major_paper	NYTIMES.COM	-0.5469	0.252785878048714	0.0171749111174113	0.0740699561420378	0.145146319741873	0.00496341270316026	0.0371957377232614	0.142108429516125	0.326555355007418	8	0.326555355007418
885	NEW YORK TIMES	The New York Times	Editorial	Section A	NA	November 19, 2005	2005	11	167	There are important differences in the two tax b	1	0	1	1	1	TRUE	major_paper	NYTIMES.COM	-0.5469	0.0363431011312862	0.00570834192915437	0.0136385430502089	0.187430572152028	0.000850165213222584	0.00236801045081151	0.0636395379786399	0.690021728094649	8	0.690021728094649
886	NEW YORK TIMES	The New York Times	Newspaper		NA	November 10, 2005	2005	11	167	DATELINE: WASHINGTON, Nov. 9 House Republican	1	0	1	1	1	TRUE	major_paper	NYTIMES.COM	-0.5469	0.553463054232962	0.0477689017152888	0.0071366435194402	0.0302912222444768	0.0518913978871738	0.00253737455538877	0.0239123711924239	0.282999034652846	1	0.553463054232962
887	NEW YORK TIMES	The New York Times	Newspaper	Section 1	NA	January 28, 2007	2007	1	133	Sally Mae Jenkins is full of stories. In a brea	1	0	1	1	1	TRUE	major_paper	NYTIMES.COM	-0.5469	0.00285709213983422	0.0204101823821094	0.0101437606230693	0.01103211064539	0.0216610792914515	0.713188005367969	0.220177107080068	0.000530662470108373	6	0.713188005367969
888	NEW YORK TIMES	The New York Times	Newspaper	Section D	NA	February 5, 2014	2014	2	50	John D. Jackson lives in the heart of the Corn	1	0	1	1	1	TRUE	major_paper	NYTIMES.COM	-0.5469	0.00772369610160931	0.151071463587033	0.00717090005810072	0.157022712988501	0.0658657686191944	0.0171743804785279	0.395837671922103	0.19813340624493	7	0.395837671922103
889	NEW YORK TIMES	The New York Times	NA	Section A	NA	May 19, 1999	1999	5	233	DATELINE: WASHINGTON, May 18 Republicans in Co	1	0	1	1	1	TRUE	major_paper	NYTIMES.COM	-0.5469	0.0916338752539918	0.0306740203814174	0.016253920033905	0.0467702239112995	0.00235283173361087	0.00236986165395948	0.0553291602180958	0.75461610681372	8	0.75461610681372
890	NEW YORK TIMES	The New York Times	NA	Section A	NA	May 26, 1999	1999	5	233	DATELINE: BOISE, Idaho, May 25 As Mirsade Bej	1	0	1	1	1	TRUE	major_paper	NYTIMES.COM	-0.5469	0.116559678083798	0.105089723886707	0.0199573022996841	0.0299440574284839	0.0641820669446083	0.333099632928776	0.327857230242993	0.00331030818495074	6	0.333099632928776
891	NEW YORK TIMES	The New York Times	NA	Section 1	NA	May 17, 1998	1998	5	245	A costly city program to help immigrants obtain	1	0	1	1	1	TRUE	major_paper	NYTIMES.COM	-0.5469	0.0148541162598934	0.610280713200727	0.213382117644551	0.052535413278736	0.00409510954247302	0.0108995796037491	0.0434131777690769	0.0505397727007936	2	0.610280713200727
892	NEW YORK TIMES	The New York Times	NA	Section B	NA	July 25, 2000	2000	7	223	A federal judge has rejected the Giuliani admin	1	0	1	1	1	TRUE	major_paper	NYTIMES.COM	-0.5469	0.00734324781038594	0.521403918356224	0.318459581185656	0.0300918301179337	0.00448610121038596	0.0269175887373847	0.0871276693140964	0.00417006326793288	2	0.521403918356224
893	NEW YORK TIMES	The New York Times	NA		NA	February 28, 1999	1999	2	230	A NEW HAVEN welfare recipient trained for a job	1	0	1	1	1	TRUE	major_paper	NYTIMES.COM	-0.5469	0.0117168227908747	0.193551548871091	0.575620971802431	0.0810674171774786	0.00228391384061198	0.0266976657304988	0.0945446781127739	0.01451698167424	3	0.575620971802431
894	NEW YORK TIMES	The New York Times	Op-Ed	Section A	NA	May 31, 2013	2013	5	65	Like many observers, I usually read reports abou	1	0	1	1	1	TRUE	major_paper	NYTIMES.COM	-0.5469	0.0932655034244936	0.017133084949283	0.239374257679884	0.285938981771496	0.00162081744928361	0.015806768798038	0.199252626080391	0.14760795984713	4	0.285938981771496
895	NEW YORK TIMES	The New York Times	Editorial	Section 1	NA	March 15, 1997	1997	3	255	Agriculture Secretary Dan Glickman blundered las	1	0	1	1	1	TRUE	major_paper	NYTIMES.COM	-0.5469	0.0254734567523863	0.116989610420729	0.157763704184017	0.30159385500318	0.0219016024944579	0.0109214547029998	0.030276649950543	0.335079666491687	8	0.335079666491687
896	NEW YORK TIMES	The New York Times	Interview		NA	December 30, 1990	1990	12	348	For more than a decade, companies have been ask	1	0	1	1	1	TRUE	major_paper	NYTIMES.COM	-0.5469	0.0435156425486453	0.174861375279341	0.108916360206426	0.409256822552231	0.00590933016207944	0.0541357459037681	0.194786021316922	0.00861870203058561	4	0.409256822552231
897	NEW YORK TIMES	The New York Times	Obituary (Obit); Biography	Section A	NA	November 23, 2002	2002	11	203	Lynda Van Devanter, whose pained account of her	1	0	1	1	1	TRUE	major_paper	NYTIMES.COM	-0.5469	0.301207174536299	0.101130555116471	0.00974115609257305	0.00670841406362081	0.112126325746692	0.300665759162455	0.164680926706359	0.00373968857553075	1	0.301207174536299
898	NEW YORK TIMES	The New York Times	NA	Section A	NA	March 25, 1998	1998	3	243	DATELINE: WASHINGTON, March 24 Congressional n	1	0	1	1	1	TRUE	major_paper	NYTIMES.COM	-0.5469	0.0265961892821055	0.206947837217029	0.203263793812769	0.0293650394632099	0.00540953387430039	0.00657164542590349	0.0139372796548858	0.507908681269797	8	0.507908681269797
899	NEW YORK TIMES	The New York Times	Letter		NA	December 18, 1997	1997	12	264	To the Editor: Your Dec. 16 news article on Ne	1	0	1	1	1	TRUE	major_paper	NYTIMES.COM	-0.5469	0.24780268990093	0.074402729415099	0.154071272559057	0.0755721844193088	0.0362722140880495	0.275222343398769	0.115546356113911	0.0211102101048763	6	0.275222343398769
900	NEW YORK TIMES	The New York Times	NA	Section A	NA	December 29, 1999	1999	12	240	Mayor Rudolph W. Giuliani announced yesterday t	1	0	1	1	1	TRUE	major_paper	NYTIMES.COM	-0.5469	0.0204903446593225	0.29956227023052	0.477222520845798	0.0763024270707349	0.00890775335525864	0.0265637173488188	0.0829905240434681	0.00796044244607905	3	0.477222520845798
901	NEW YORK TIMES	The New York Times	NA	Section A	NA	November 22, 1994	1994	11	299	DATELINE: WASHINGTON, Nov. 21 The Republican	1	0	1	1	1	TRUE	major_paper	NYTIMES.COM	-0.5469	0.0694093223371513	0.102370081761474	0.541352679942059	0.00602046986323052	0.00133625423962529	0.00192349320654853	0.00359969220155126	0.27398800644836	3	0.541352679942059
902	NEW YORK TIMES	The New York Times	NA		NA	May 15, 1997	1997	5	257	DATELINE: NEWARK TO see them in their small ro	1	0	1	1	1	TRUE	major_paper	NYTIMES.COM	-0.5469	0.00615848101425152	0.0668987364271065	0.0047809740650791	0.00555682062842933	0.0505384104027693	0.273440706898922	0.591804336982024	0.000821533581417948	7	0.591804336982024
903	NEW YORK TIMES	The New York Times	NA	Section A	NA	August 7, 1992	1992	8	320	DATELINE: WASHINGTON, Aug. 6 Seizing the Repub	1	0	1	1	1	TRUE	major_paper	NYTIMES.COM	-0.5469	0.186192127634145	0.016256087075991	0.240983582183059	0.0221613157870695	0.00177050608600081	0.0101948571291712	0.0596951469489138	0.46274637715565	8	0.46274637715565
904	NEW YORK TIMES	The New York Times	Letter		NA	June 7, 1995	1995	6	282	To the Editor: Julian L. Simon says that illega	1	0	1	1	1	TRUE	major_paper	NYTIMES.COM	-0.5469	0.0323347513318769	0.274775673358513	0.26662316087563	0.20277508790765	0.0454346347640734	0.0223541953849594	0.0476347210994742	0.108067775277823	2	0.274775673358513
905	NEW YORK TIMES	The New York Times	Series	Section C	NA	March 18, 1992	1992	3	315	IT was called "The Gourmet Revolution," "The Di	0	0	0	1	1	TRUE	major_paper	NYTIMES.COM	-0.5469	0.0333196592395589	0.197662010890622	0.00949799080834698	0.267451403283093	0.044174726740897	0.0180941056705082	0.413607745906693	0.016192357460281	7	0.413607745906693
906	NEW YORK TIMES	The New York Times	Newspaper	Section A	NA	January 7, 2015	2015	1	37	Every day, Aida Mizquiri and her children conten	1	0	1	1	1	TRUE	major_paper	NYTIMES.COM	-0.5469	0.00152913400717398	0.0628023685717519	0.0283822638126665	0.00454206920349859	0.00530227447989366	0.826355551320553	0.0706261268826985	0.000460211721764738	6	0.826355551320553
907	NEW YORK TIMES	The New York Times	A Special Report		NA	December 16, 1990	1990	12	348	DATELINE: NEWARK Joseph Michael Donlon had an	1	0	1	1	1	TRUE	major_paper	NYTIMES.COM	-0.5469	0.0020908690218884	0.0857455055963809	0.0359158962757822	0.0825464078955738	0.0376627440095356	0.277934317092329	0.47706740431726	0.00103685579125038	7	0.47706740431726
908	NEW YORK TIMES	The New York Times	Newspaper	Section A	NA	September 11, 2009	2009	9	117	In the recession, the nation's poverty rate clim	1	0	1	1	1	TRUE	major_paper	NYTIMES.COM	-0.5469	0.0236976918023715	0.0426887296992384	0.0715355762901375	0.802872877584628	0.00221262547846165	0.00631467116101147	0.0121948859533088	0.0384829420308428	4	0.802872877584628
909	NEW YORK TIMES	The New York Times	Newspaper	Section A	NA	December 4, 2011	2011	12	96	The bullies in middle and high school did not c	1	0	1	1	1	TRUE	major_paper	NYTIMES.COM	-0.5469	0.00127566956124026	0.0134841237522155	0.0197538271119536	0.0416831977782704	0.00489593909749043	0.870178717431343	0.0482502546742241	0.000478270593262074	6	0.870178717431343
910	NEW YORK TIMES	The New York Times	Newspaper		NA	October 16, 2005	2005	10	166	The police are searching for a Staten Island tee	1	0	1	1	1	TRUE	major_paper	NYTIMES.COM	-0.5469	0.00473772219192551	0.0843502474951992	0.00864767204488655	0.00556955535728025	0.124274410270185	0.640353705416071	0.131356672648517	0.000710014575935782	6	0.640353705416071
911	NEW YORK TIMES	The New York Times	Letter	Section A	NA	January 30, 2015	2015	1	37	To the Editor: Re ''More Fall Out as Middle Cla	1	0	1	1	1	TRUE	major_paper	NYTIMES.COM	-0.5469	0.11859244295406	0.015589819903352	0.0143715909517324	0.735957835971188	0.00349957922167623	0.00852178349599836	0.0816638769261551	0.0218030705758384	4	0.735957835971188
912	NEW YORK TIMES	The New York Times	Summary	Section A	NA	July 24, 1997	1997	7	259	INTERNATIONAL A3-11 Milosevic Expands Powe	1	0	1	1	1	TRUE	major_paper	NYTIMES.COM	-0.5469	0.290346104193388	0.301500860399516	0.0880691047432805	0.0421109122353965	0.0905852142917071	0.0505031463012377	0.0308122522424722	0.106072405593001	2	0.301500860399516
913	NEW YORK TIMES	The New York Times	NA	Section A	NA	May 6, 1997	1997	5	257	In a reflection of the rising political and eco	1	0	1	1	1	TRUE	major_paper	NYTIMES.COM	-0.5469	0.160093403253724	0.516946793870746	0.139054215064607	0.0169996040636437	0.00582703814348449	0.014089114105847	0.0269997645294283	0.119990066968519	2	0.516946793870746
914	NEW YORK TIMES	The New York Times	Summary	Section A	NA	July 20, 2009	2009	7	115	International NETANYAHU'S TALK OF PEACE Finds	1	0	1	1	1	TRUE	major_paper	NYTIMES.COM	-0.5469	0.363530734188348	0.21883994263811	0.0107735500252735	0.0151364891783404	0.106120544909748	0.0325012392004049	0.172752525799607	0.0803449740601677	1	0.363530734188348
915	NEW YORK TIMES	The New York Times	NA		NA	July 9, 1992	1992	7	319	DATELINE: WASHINGTON, July 8 Democrats hate t	1	0	1	1	1	TRUE	major_paper	NYTIMES.COM	-0.5469	0.206845245221831	0.00767188689721251	0.0106851743860894	0.278404169139105	0.000832812603909014	0.000522995859377384	0.0173042127585179	0.477733503133957	8	0.477733503133957
916	NEW YORK TIMES	The New York Times	Editorial	Section A	NA	June 25, 2011	2011	6	90	For all of the economic hardship of the last sev	1	0	1	1	1	TRUE	major_paper	NYTIMES.COM	-0.5469	0.0144388961500951	0.00793612910969876	0.298627973156311	0.228154072333386	0.00032425085743934	0.0032889332104225	0.0218108343967787	0.42541891078587	8	0.42541891078587
917	NEW YORK TIMES	The New York Times	Biography	Section A	NA	December 22, 1997	1997	12	264	DATELINE: WASHINGTON, Dec. 21 Bill Clinton, me	1	0	1	1	1	TRUE	major_paper	NYTIMES.COM	-0.5469	0.383497803660769	0.074482767323672	0.0252900287412429	0.00872327537032616	0.0384071122865643	0.0545398029922634	0.375768972372061	0.0392902372531014	1	0.383497803660769
918	NEW YORK TIMES	The New York Times	Letter	Section 4	NA	August 5, 2001	2001	8	212	To the Editor: Those not moved by Barbara Ehren	0	0	0	1	1	TRUE	major_paper	NYTIMES.COM	-0.5469	0.0375669590037731	0.0919580618107598	0.282033796829188	0.273106235882264	0.0125572173763224	0.0724771186868908	0.168159865994298	0.0621407444165037	3	0.282033796829188
919	NEW YORK TIMES	The New York Times	Newspaper	Section B	NA	January 27, 2007	2007	1	133	Norma Turner, 14, is her mother's daughter. Her	1	0	1	1	1	TRUE	major_paper	NYTIMES.COM	-0.5469	0.00274013872145971	0.0377768295756459	0.0438402857223364	0.00950877641334708	0.00548878939199049	0.682985162265318	0.216751242656083	0.000908775253818863	6	0.682985162265318
920	NEW YORK TIMES	The New York Times	NA	Section 1	NA	December 23, 1995	1995	12	288	DATELINE: WASHINGTON, Dec. 22 The Senate toda	1	0	1	1	1	TRUE	major_paper	NYTIMES.COM	-0.5469	0.255383799373911	0.0179883705254421	0.223431277877978	0.0181558417596997	0.00134312229469555	0.00346589395797051	0.0160706961897157	0.464160998020587	8	0.464160998020587
921	NEW YORK TIMES	The New York Times	News	US	NA	July 2, 2017	2017	7	19	HIGHLIGHT: Those who support the White House Ki	1	0	1	1	1	TRUE	major_paper	NYTIMES.COM	-0.5469	0.203982568687053	0.0359629538098413	0.0452723087859031	0.0134527216299395	0.0118927590616197	0.23451989147835	0.37562840689943	0.0792883896478637	7	0.37562840689943
922	NEW YORK TIMES	The New York Times	NA	Section A	NA	July 9, 1998	1998	7	247	As the Indonesia economy worsens, Government off	1	0	1	1	1	TRUE	major_paper	NYTIMES.COM	-0.5469	0.256171861553348	0.273180600355635	0.0150053281667421	0.301416294521565	0.0206194325089537	0.00383011682546921	0.0261410145235328	0.103635351544754	4	0.301416294521565
923	NEW YORK TIMES	The New York Times	NA		NA	March 12, 1991	1991	3	327	DATELINE: WASHINGTON, March 9 Congress hardly	1	0	1	1	1	TRUE	major_paper	NYTIMES.COM	-0.5469	0.104137348799227	0.0439322634573835	0.00950599189317618	0.0245286403200599	0.191795228969874	0.0103923630134204	0.199815591711216	0.415892571835643	8	0.415892571835643
924	NEW YORK TIMES	The New York Times	Biography		NA	September 28, 1992	1992	9	321	DATELINE: DALLAS, Sept. 27 In the 21 weeks fr	1	0	1	1	1	TRUE	major_paper	NYTIMES.COM	-0.5469	0.296704288804531	0.0196937057755589	0.0363158517085667	0.137432981458903	0.00255428434391127	0.00797550398040209	0.0667561042357182	0.43256727969241	8	0.43256727969241
925	NEW YORK TIMES	The New York Times	NA		NA	May 7, 2000	2000	5	221	SHE remembers the last moments of her old life.	1	0	1	1	1	TRUE	major_paper	NYTIMES.COM	-0.5469	0.00807932885948747	0.08525902604012	0.0707050761688369	0.0167963080903598	0.0188367971254364	0.391848102771692	0.406132235202886	0.00234312574118144	7	0.406132235202886
926	NEW YORK TIMES	The New York Times	NA	Section B	NA	September 4, 1990	1990	9	345	DATELINE: ATLANTA, Sept. 3 ''We probably have	1	0	1	1	1	TRUE	major_paper	NYTIMES.COM	-0.5469	0.00823252071847723	0.134455169552439	0.365040828250401	0.185272276646848	0.0338887939501328	0.0473903928437863	0.0234556850794154	0.202264332958501	3	0.365040828250401
927	NEW YORK TIMES	The New York Times	NA		NA	September 13, 1992	1992	9	321	IT'S a point of reference for millions of motori	1	0	1	1	1	TRUE	major_paper	NYTIMES.COM	-0.5469	0.0121236239689354	0.300227084163927	0.00857984884401704	0.174217958217299	0.107704898741206	0.110831319641373	0.279888080531318	0.00642718589192428	2	0.300227084163927
928	NEW YORK TIMES	The New York Times	Newspaper	Section 8	NA	February 4, 2007	2007	2	134	DATELINE: MIAMI, Feb. 3 After LaJuan Moore mad	1	0	1	1	1	TRUE	major_paper	NYTIMES.COM	-0.5469	0.0121213102121905	0.0236247629240997	0.0029044131407599	0.0069215431302977	0.0764212095295322	0.215117667600154	0.662020834488192	0.000868258974773871	7	0.662020834488192
929	NEW YORK TIMES	The New York Times	Newspaper	Section B	NA	September 14, 2016	2016	9	33	Working families finally got a raise. Early on	1	0	1	1	1	TRUE	major_paper	NYTIMES.COM	-0.5469	0.0328289358492135	0.0119227384201397	0.0117392219010125	0.831796228363059	0.00133121067864741	0.00426162224848136	0.0888488596923575	0.0172711828470895	4	0.831796228363059
930	NEW YORK TIMES	The New York Times	Newspaper		NA	June 28, 2011	2011	6	90	ATLANTA -- A federal judge has blocked the most	1	0	1	1	1	TRUE	major_paper	NYTIMES.COM	-0.5469	0.0991285842798057	0.513877738457659	0.0931658683918305	0.0162218721661573	0.10938086015256	0.0150777459425523	0.0945614115969636	0.0585859190124716	2	0.513877738457659
931	NEW YORK TIMES	The New York Times	NA	Section B	NA	September 13, 1994	1994	9	297	They were called "markets," though they served f	1	0	1	1	1	TRUE	major_paper	NYTIMES.COM	-0.5469	0.00644128088145828	0.678575413911618	0.0679432028332052	0.0150217509102499	0.0668359850373909	0.0393188351596766	0.119006409952522	0.00685712131387954	2	0.678575413911618
932	NEW YORK TIMES	The New York Times	NA		NA	December 10, 2000	2000	12	228	THE good economic times in Westchester have cre	1	0	1	1	1	TRUE	major_paper	NYTIMES.COM	-0.5469	0.00478546208897045	0.0358795346841127	0.510065693464616	0.0845576854338984	0.00314316218657413	0.148001745475974	0.194857061184371	0.0187096554814838	3	0.510065693464616
933	NEW YORK TIMES	The New York Times	Newspaper	Section A	NA	May 16, 2001	2001	5	209	DATELINE: BOSTON, May 15 A doctor gets very t	1	0	1	1	1	TRUE	major_paper	NYTIMES.COM	-0.5469	0.0121208660805734	0.157959100875169	0.272290760773201	0.00983441563341029	0.00599930275258911	0.300526815125801	0.237964754557763	0.00330398420149199	6	0.300526815125801
934	NEW YORK TIMES	The New York Times	Newspaper	Section A	NA	April 20, 2011	2011	4	88	Ronald Brown, an offshore oil rig worker from Ma	1	0	1	1	1	TRUE	major_paper	NYTIMES.COM	-0.5469	0.0138744630379119	0.0967297717571189	0.0124034329524765	0.0253481756192799	0.174926451034615	0.266054013700991	0.40575839782619	0.00490529407141747	7	0.40575839782619
935	NEW YORK TIMES	The New York Times	Letter	Section	NA	March 28, 2013	2013	3	63	To the Editor: Sadly, some states continue to d	1	0	1	1	1	TRUE	major_paper	NYTIMES.COM	-0.5469	0.272340664678236	0.166141603690965	0.166416386136894	0.159214187199261	0.124216833802901	0.0218504115633873	0.0623250470581278	0.0274948658702275	1	0.272340664678236
936	NEW YORK TIMES	The New York Times	NA	Section A	NA	February 9, 1994	1994	2	290	DATELINE: WASHINGTON, Feb. 8 The Pentagon's tw	1	0	1	1	1	TRUE	major_paper	NYTIMES.COM	-0.5469	0.235444170840413	0.0748290821180385	0.0163447125008402	0.012400413370502	0.0388380071918194	0.00270193215461576	0.0165409603329924	0.602900721490779	8	0.602900721490779
937	NEW YORK TIMES	The New York Times	Interview		NA	December 5, 1999	1999	12	240	On Friday night, Rabbi Samuel Bogomilsky lighted	1	0	1	1	1	TRUE	major_paper	NYTIMES.COM	-0.5469	0.0976074312386591	0.139501584249341	0.0134337854310004	0.0240011053357607	0.0566962796141253	0.334175922528092	0.330986386970006	0.0035975046330158	6	0.334175922528092
938	NEW YORK TIMES	The New York Times	Correction	Section A	NA	April 24, 2013	2013	4	64	An article in some editions on Monday about the p	1	0	1	1	1	TRUE	major_paper	NYTIMES.COM	-0.5469	0.0297800356962584	0.260112924556576	0.0490751454530186	0.509699699248882	0.0213001579572107	0.0277107184450497	0.0571804985740193	0.045140820068985	4	0.509699699248882
939	NEW YORK TIMES	The New York Times	Letter		NA	December 12, 1997	1997	12	264	To the Editor: Re "Denied Food Stamps, Many Im	1	0	1	1	1	TRUE	major_paper	NYTIMES.COM	-0.5469	0.0183108880883299	0.252021385876521	0.544861962181337	0.0339067471596106	0.016014738229583	0.0947647768381727	0.0244506380029437	0.0156688636235022	3	0.544861962181337
940	NEW YORK TIMES	The New York Times	Op-Ed	Section A	NA	February 16, 2016	2016	2	26	WHY do poor children have poor diets? Some comm	1	0	1	1	1	TRUE	major_paper	NYTIMES.COM	-0.5469	0.00735796520171888	0.0177245907175541	0.303787190541117	0.0594037574374349	0.00261559774526153	0.128694921540249	0.46886783278317	0.0115481440334942	7	0.46886783278317
941	NEW YORK TIMES	The New York Times	NA	Section 1	NA	January 20, 1990	1990	1	337	From some quarters, there was predictable praise	1	0	1	1	1	TRUE	major_paper	NYTIMES.COM	-0.5469	0.192294558064408	0.567127128697403	0.0709568865443713	0.00607749957618799	0.0743897012663389	0.0438800553888016	0.0378698260604667	0.00740434440202294	2	0.567127128697403
942	NEW YORK TIMES	The New York Times	Op-Ed	Section A	NA	January 29, 2014	2014	1	49	DENVER -- There's a lot of giggling in Colorado,	1	0	1	1	1	TRUE	major_paper	NYTIMES.COM	-0.5469	0.297908899213056	0.0495934348745357	0.0102498036504204	0.032449385446088	0.0803996153948069	0.0301383800646466	0.482549844311079	0.0167106370453684	7	0.482549844311079
943	NEW YORK TIMES	The New York Times	NA		NA	August 23, 1992	1992	8	320	DATELINE: WASHINGTON IN accepting renomination	1	0	1	1	1	TRUE	major_paper	NYTIMES.COM	-0.5469	0.56519123518186	0.00923706610551183	0.0260938593046114	0.076195084350711	0.00177490215656634	0.00294724842380389	0.015807112392935	0.302753492084001	1	0.56519123518186
944	NEW YORK TIMES	The New York Times	Op-Ed		NA	October 12, 1995	1995	10	286	DATELINE: WASHINGTON The resentment of most wh	1	0	1	1	1	TRUE	major_paper	NYTIMES.COM	-0.5469	0.564990568219105	0.0621449390110812	0.00616193018381557	0.0193507191804156	0.0940000556177143	0.0169962245554908	0.228616001311848	0.00773956192052971	1	0.564990568219105
945	NEW YORK TIMES	The New York Times	Newspaper	Section B	NA	December 7, 2005	2005	12	168	Aleksandr Shteyn made two bold moves as an adult	1	0	1	1	1	TRUE	major_paper	NYTIMES.COM	-0.5469	0.00826343709212871	0.098160389625681	0.0386016902653664	0.0109998056105062	0.0184091349229795	0.735885537863524	0.0880619010800662	0.0016181035397476	6	0.735885537863524
946	NEW YORK TIMES	The New York Times	NA	Section A	NA	February 10, 1994	1994	2	290	DATELINE: CHICAGO, Feb. 9 At 4:30 in the morn	1	0	1	1	1	TRUE	major_paper	NYTIMES.COM	-0.5469	0.00528076587335849	0.118690410075854	0.149808516428716	0.0434798422645267	0.0623896363235662	0.22682224688108	0.378202448089971	0.0153261340629276	7	0.378202448089971
947	NEW YORK TIMES	The New York Times	Special Report		NA	April 14, 1992	1992	4	316	DATELINE: DETROIT, April 8 Body odor, ammonia	1	0	1	1	1	TRUE	major_paper	NYTIMES.COM	-0.5469	0.0241489745543364	0.030059058903774	0.230393278872772	0.0259361918288312	0.0330734838110577	0.339949328848878	0.303347511773637	0.0130921714067139	6	0.339949328848878
948	NEW YORK TIMES	The New York Times	Newspaper	Section A	NA	January 20, 2014	2014	1	49	Antonia Caba did not have any tissues so she use	1	0	1	1	1	TRUE	major_paper	NYTIMES.COM	-0.5469	0.00348952636552238	0.00989536809457803	0.0286539958122502	0.0321173279874438	0.00430089763333454	0.712962813818395	0.207355704888555	0.00122436539992054	6	0.712962813818395
949	NEW YORK TIMES	The New York Times	Newspaper	Section A	NA	January 10, 2012	2012	1	73	DERRY, N.H. -- Rick Santorum said Monday that co	1	0	1	1	1	TRUE	major_paper	NYTIMES.COM	-0.5469	0.292506380936207	0.0578350793393108	0.0390416235928038	0.0905093985853554	0.0274214344515382	0.0360854565024776	0.44003062326264	0.0165700033296669	7	0.44003062326264
950	NEW YORK TIMES	The New York Times	Newspaper	Section 1	NA	June 13, 2004	2004	6	174	DATELINE: WASHINGTON, June 12 The Bush adminis	1	0	1	1	1	TRUE	major_paper	NYTIMES.COM	-0.5469	0.0172989458810329	0.321001967045577	0.30266597707881	0.0492227022138183	0.0188895365796839	0.0204620593674859	0.00968679418816962	0.260772017645423	2	0.321001967045577
951	NEW YORK TIMES	The New York Times	Editorial	Section A	NA	January 2, 2012	2012	1	73	Five years ago, New York State stopped requiring	1	0	1	1	1	TRUE	major_paper	NYTIMES.COM	-0.5469	0.0243127727968647	0.639843891154614	0.164920998448538	0.0849041524895044	0.0110240878525104	0.014457712965276	0.0267558514456714	0.0337805328470205	2	0.639843891154614
952	NEW YORK TIMES	The New York Times	NA	Section A	NA	September 14, 1995	1995	9	285	DATELINE: WASHINGTON, Sept. 13 A plan for the	1	0	1	1	1	TRUE	major_paper	NYTIMES.COM	-0.5469	0.0842474586312163	0.0161762199748529	0.0539101270922887	0.0525886418839371	0.00461302697093883	0.00352061030141205	0.0437461505691628	0.741197764576191	8	0.741197764576191
953	NEW YORK TIMES	The New York Times	Newspaper		NA	December 13, 2002	2002	12	204	Lucyna Czercowy left the rolling hills of Poland	1	0	1	1	1	TRUE	major_paper	NYTIMES.COM	-0.5469	0.00740205912106536	0.0256163819652579	0.0158456254903322	0.00694877813164556	0.0111467091150183	0.773849622247954	0.158321884981693	0.000868938947033847	6	0.773849622247954
954	NEW YORK TIMES	The New York Times	NA	Section B	NA	August 3, 1994	1994	8	296	DATELINE: ALBANY, Aug. 2 In a new attack again	1	0	1	1	1	TRUE	major_paper	NYTIMES.COM	-0.5469	0.0496353260036718	0.425593061008851	0.379338850330564	0.0684845931060588	0.00986271792039753	0.0146429314041381	0.0329600096103283	0.0194825106159906	2	0.425593061008851
955	NEW YORK TIMES	The New York Times	NA		NA	April 6, 1997	1997	4	256	DATELINE: TRENTON Social troubles that hurt th	1	0	1	1	1	TRUE	major_paper	NYTIMES.COM	-0.5469	0.00355059428481428	0.082997307226968	0.38968426339915	0.417437463134007	0.0750848616068068	0.0173725072124793	0.00864655212308431	0.00522645101268987	4	0.417437463134007
956	NEW YORK TIMES	The New York Times	NA	Section A	NA	October 16, 1995	1995	10	286	In Washington, the Senate Republicans say their	1	0	1	1	1	TRUE	major_paper	NYTIMES.COM	-0.5469	0.0107435398348395	0.0280548361413704	0.181491312992603	0.16607059063248	0.012580395845651	0.255053326152799	0.118240731283773	0.227765267116485	6	0.255053326152799
957	NEW YORK TIMES	The New York Times	News; Series	Section B	NA	April 11, 2015	2015	4	40	It's not only what you have, but how you feel.	1	0	1	1	1	TRUE	major_paper	NYTIMES.COM	-0.5469	0.0358348613301839	0.0183969045552208	0.0123649581805056	0.760324448312437	0.00274469860445384	0.0271116011774323	0.137741101793854	0.00548142604591258	4	0.760324448312437
958	NEW YORK TIMES	The New York Times	NA		NA	February 15, 1995	1995	2	278	DATELINE: WASHINGTON, Feb. 14 House Republican	1	0	1	1	1	TRUE	major_paper	NYTIMES.COM	-0.5469	0.147112329806291	0.0130493055856983	0.409827925166319	0.0117625090266006	0.000968926717696562	0.00528116767323681	0.0234927314876093	0.388505104536549	3	0.409827925166319
959	NEW YORK TIMES	The New York Times	NA	Section A	NA	July 8, 1992	1992	7	319	DATELINE: WASHINGTON, July 7 Most people agree	1	0	1	1	1	TRUE	major_paper	NYTIMES.COM	-0.5469	0.0539494068232899	0.00628500425057302	0.508241230560227	0.300684641513083	0.000523622523240404	0.015644301321508	0.0237842451677383	0.0908875478403399	3	0.508241230560227
960	NEW YORK TIMES	The New York Times	Op-Ed	Section 14	NA	June 17, 2007	2007	6	138	DATELINE: Washington THE mayor of New York's n	1	0	1	1	1	TRUE	major_paper	NYTIMES.COM	-0.5469	0.00339537380266664	0.24041078227668	0.442823311614536	0.246521302317184	0.00286742375613089	0.027885553397856	0.0229655527574953	0.0131307000774513	3	0.442823311614536
961	NEW YORK TIMES	The New York Times	NA		NA	August 1, 1992	1992	8	320	DATELINE: RIVERSIDE, Calif., July 31 President	1	0	1	1	1	TRUE	major_paper	NYTIMES.COM	-0.5469	0.374338888389251	0.0327558028853644	0.272120220329891	0.0614026529585095	0.00275743565992005	0.00977188043495592	0.134861941809519	0.111991177532589	1	0.374338888389251
962	NEW YORK TIMES	The New York Times	Newspaper	Section B	NA	December 25, 2002	2002	12	204	A processing problem that incorrectly removed ne	1	0	1	1	1	TRUE	major_paper	NYTIMES.COM	-0.5469	0.0283255044057354	0.50242320824125	0.289669416680613	0.120568988766054	0.00529146626501412	0.0087089595560983	0.0212166814350041	0.0237957746502321	2	0.50242320824125
963	NEW YORK TIMES	The New York Times	NA	Section D	NA	April 2, 1990	1990	4	340	DATELINE: WASHINGTON, April 1 Ask a Republica	1	0	1	1	1	TRUE	major_paper	NYTIMES.COM	-0.5469	0.37007463959948	0.0301308474351523	0.00724528909432543	0.0141743249196012	0.00333472644191888	0.00265073978311439	0.1684072391575	0.403982193568908	8	0.403982193568908
964	NEW YORK TIMES	The New York Times	Summary	Section A	NA	March 5, 1999	1999	3	231	INTERNATIONAL A3-9 Mexican Leader Proposes	1	0	1	1	1	TRUE	major_paper	NYTIMES.COM	-0.5469	0.351757957992825	0.259509547966677	0.0158799095619218	0.0327970241435609	0.110219656497708	0.024326895311995	0.0410898227699486	0.164419185755364	1	0.351757957992825
965	NEW YORK TIMES	The New York Times	NA	Section 1	NA	March 3, 1991	1991	3	327	DATELINE: BARBOURVILLE, Ky. This part of sout	1	0	1	1	1	TRUE	major_paper	NYTIMES.COM	-0.5469	0.00554007741528172	0.226996632138334	0.0117177684462228	0.181177601348344	0.263692649494098	0.0329855341522298	0.272205128832131	0.00568460817335952	7	0.272205128832131
966	NEW YORK TIMES	The New York Times	Newspaper		NA	June 22, 2008	2008	6	126	Making ends meet on food stamps has never been e	1	0	1	1	1	TRUE	major_paper	NYTIMES.COM	-0.5469	0.00896060507288364	0.0911535680206708	0.131376068187182	0.336762602106066	0.00526831735741965	0.180049871602262	0.157564709725658	0.0888642579278568	4	0.336762602106066
967	NEW YORK TIMES	The New York Times	Newspaper	Section MB	NA	October 4, 2009	2009	10	118	In 2007, Judith Rubenstein, a Bronx native and f	1	0	1	1	1	TRUE	major_paper	NYTIMES.COM	-0.5469	0.0093368720377074	0.115620492937167	0.196444438865269	0.0410410830110491	0.0130636724930586	0.328707770532065	0.290601604893464	0.00518406523022026	6	0.328707770532065
968	NEW YORK TIMES	The New York Times	Newspaper	Section CT	NA	October 4, 2009	2009	10	118	There are 34 beds for the homeless at the Beth-E	1	0	1	1	1	TRUE	major_paper	NYTIMES.COM	-0.5469	0.00817144172735384	0.218990290805376	0.121540285692863	0.0541676321163401	0.0129475283218224	0.298245471044719	0.280493562214618	0.00544378807690774	6	0.298245471044719
969	NEW YORK TIMES	The New York Times	Newspaper	Section B	NA	April 13, 2007	2007	4	136	The Rent Guidelines Board, embarking once again	1	0	1	1	1	TRUE	major_paper	NYTIMES.COM	-0.5469	0.00230848839862621	0.246253993920158	0.0340838202736638	0.45706428393542	0.0095582425317307	0.217037108801028	0.0303577627627062	0.00333629937666721	4	0.45706428393542
970	NEW YORK TIMES	The New York Times	Editorial	Section A	NA	June 18, 2011	2011	6	90	The White House has said not to expect any back-	1	0	1	1	1	TRUE	major_paper	NYTIMES.COM	-0.5469	0.102129459567699	0.0070155010139092	0.0327418045415258	0.158529334719186	0.00140378679814761	0.00401909901013958	0.0767712557047117	0.617389758644681	8	0.617389758644681
971	NEW YORK TIMES	The New York Times	NA	Section B	NA	January 23, 1999	1999	1	229	A Federal judge ordered the Giuliani administrat	1	0	1	1	1	TRUE	major_paper	NYTIMES.COM	-0.5469	0.00242428271906296	0.652454716029677	0.266796892052221	0.0200473684250418	0.00740371990547117	0.0372153770787895	0.00927291660876814	0.00438472718096786	2	0.652454716029677
972	NEW YORK TIMES	The New York Times	NA	Section A	NA	November 2, 1993	1993	11	311	DATELINE: WASHINGTON, Nov. 1 The Clinton Admi	1	0	1	1	1	TRUE	major_paper	NYTIMES.COM	-0.5469	0.147201765571417	0.0688653003916325	0.648075586856372	0.0346658741132308	0.00167132484382822	0.00507056296157491	0.0271540941851835	0.0672954910767611	3	0.648075586856372
973	NEW YORK TIMES	The New York Times	Op-Ed	Section A	NA	December 18, 2012	2012	12	84	Washington DISCUSSING the federal budget negoti	1	0	1	1	1	TRUE	major_paper	NYTIMES.COM	-0.5469	0.0846793107963624	0.00864183151601038	0.00768695456373645	0.281615602913897	0.0013628113979588	0.00172004634179887	0.0944048354103123	0.519888607059924	8	0.519888607059924
974	NEW YORK TIMES	The New York Times	NA	Section A	NA	November 29, 1990	1990	11	347	DATELINE: WASHINGTON, Nov. 28 Alarmed at rece	1	0	1	1	1	TRUE	major_paper	NYTIMES.COM	-0.5469	0.0308138245615466	0.201070340509122	0.590741141644936	0.0494071366561107	0.00489826061082425	0.0312109561170556	0.0314095765808446	0.0604487633195601	3	0.590741141644936
975	NEW YORK TIMES	The New York Times	NA		NA	August 27, 1992	1992	8	320	DATELINE: MIAMI, Aug. 26 Relief supplies and	1	0	1	1	1	TRUE	major_paper	NYTIMES.COM	-0.5469	0.0107867656979743	0.414963688376954	0.0355735631309638	0.0704794371225518	0.250833669824347	0.0956859858114997	0.115705288081082	0.00597160195462746	2	0.414963688376954
976	NEW YORK TIMES	The New York Times	Newspaper	Section A	NA	April 22, 2013	2013	4	64	The rise in New York City's poverty rate as a re	1	0	1	1	1	TRUE	major_paper	NYTIMES.COM	-0.5469	0.00644480197384148	0.180306053721218	0.0953240922900405	0.639381907718968	0.00479619790196075	0.0437362077374521	0.0195110227456427	0.010499715910877	4	0.639381907718968
977	NEW YORK TIMES	The New York Times	NA	Section A	NA	November 11, 1994	1994	11	299	DATELINE: WASHINGTON, Oct. 10 Aiming to avert	1	0	1	1	1	TRUE	major_paper	NYTIMES.COM	-0.5469	0.142383729522974	0.184427136379692	0.0346784153165213	0.118730418782835	0.0454522245010586	0.140392142681649	0.0290809911163889	0.304854941698881	8	0.304854941698881
978	NEW YORK TIMES	The New York Times	NA	Section A	NA	January 8, 1998	1998	1	241	DATELINE: MIAMI, Jan. 7 Escalating his war of	0	0	0	1	1	TRUE	major_paper	NYTIMES.COM	-0.5469	0.354765170253912	0.452823824133868	0.013402916794102	0.0182073628393542	0.0241017902928774	0.00851990191836201	0.11566774855207	0.0125112852154549	2	0.452823824133868
979	NEW YORK TIMES	The New York Times	Newspaper	Section BU	NA	October 23, 2016	2016	10	34	Raises at Walmart ''And in This Aisle, Higher P	1	1	1	1	1	TRUE	major_paper	NYTIMES.COM	-0.5469	0.0155703848897708	0.0866078722803164	0.0533180729818103	0.478287049123602	0.0117133721655002	0.0685036100519001	0.277214854131085	0.00878478437601437	4	0.478287049123602
980	NEW YORK TIMES	The New York Times	Newspaper		NA	December 2, 2002	2002	12	204	Inside a ground-floor apartment of a too-small	1	0	1	1	1	TRUE	major_paper	NYTIMES.COM	-0.5469	0.00152745708191595	0.00700189709734473	0.044660088277515	0.0175353171018577	0.00260273409076052	0.815831610215	0.110235347159617	0.000605548975988982	6	0.815831610215
981	NEW YORK TIMES	The New York Times	NA		NA	September 23, 1992	1992	9	321	DATELINE: SHREVEPORT, La., Sept. 22 Trailing	1	0	1	1	1	TRUE	major_paper	NYTIMES.COM	-0.5469	0.673255458357781	0.016591024307943	0.0199386989466332	0.0603663134263708	0.0600165390553714	0.00722661274994098	0.132815625221472	0.0297897279344869	1	0.673255458357781
982	NEW YORK TIMES	The New York Times	Newspaper	Section D	NA	October 27, 2010	2010	10	106	FOR Samira Kawash, a writer who lives in Brookl	1	0	1	1	1	TRUE	major_paper	NYTIMES.COM	-0.5469	0.0679800981686683	0.083441921332525	0.0329771349999406	0.105414574026761	0.0153144001422256	0.0629576417838476	0.62330767705625	0.00860655248978223	7	0.62330767705625
983	NEW YORK TIMES	The New York Times	NA		NA	December 29, 1999	1999	12	240	It can be hard enough to deal with the long line	1	0	1	1	1	TRUE	major_paper	NYTIMES.COM	-0.5469	0.00406214984307618	0.0209554020638327	0.0908505919536868	0.00833992457144754	0.00355740100917727	0.715446070273565	0.153952459453802	0.00283600083141292	6	0.715446070273565
984	NEW YORK TIMES	The New York Times	Newspaper	Section A	NA	August 26, 2009	2009	8	116	DATELINE: WASHINGTON The nation's fiscal outl	1	0	1	1	1	TRUE	major_paper	NYTIMES.COM	-0.5469	0.0854363828822168	0.037706627081714	0.0154080109416432	0.304275659549281	0.00471770462447037	0.000878149017976588	0.00710658555452314	0.544470880348175	8	0.544470880348175
985	NEW YORK TIMES	The New York Times	News Analysis	Section B	NA	February 10, 1992	1992	2	314	DATELINE: TRENTON, Feb. 7 Much of the debate	1	0	1	1	1	TRUE	major_paper	NYTIMES.COM	-0.5469	0.00428845993958527	0.0189549134402542	0.690662695089096	0.0806218200019262	0.00108359561789705	0.0815188656513192	0.0126094365442879	0.110260213715634	3	0.690662695089096
986	NEW YORK TIMES	The New York Times	NA		NA	March 27, 1997	1997	3	255	DATELINE: FAIRFIELD, Conn. GUY AND ANN LOUISE-	1	0	1	1	1	TRUE	major_paper	NYTIMES.COM	-0.5469	0.0162498684287766	0.222247294236243	0.117589895974797	0.0812801766605542	0.0806849177930438	0.120702330103088	0.350229181471459	0.0110163353320391	7	0.350229181471459
987	NEW YORK TIMES	The New York Times	Editorial	Section A	NA	March 18, 2015	2015	3	39	If the budget resolution released on Tuesday by	1	0	1	1	1	TRUE	major_paper	NYTIMES.COM	-0.5469	0.035141158936596	0.00672224014635533	0.0497733270404768	0.215901993039953	0.000625410660077024	0.00335600914785384	0.0520224740665783	0.63645738696211	8	0.63645738696211
988	NEW YORK TIMES	The New York Times	NA	Section A	NA	February 17, 1995	1995	2	278	DATELINE: WASHINGTON, Feb. 16 Democratic gover	1	0	1	1	1	TRUE	major_paper	NYTIMES.COM	-0.5469	0.24384554371964	0.0086533734614933	0.421869355076688	0.0142586621782124	0.000660494143987813	0.00418456332088922	0.0160728197428942	0.290455188356195	3	0.421869355076688
989	NEW YORK TIMES	The New York Times	Op-Ed		NA	February 24, 2017	2017	2	14	HIGHLIGHT: The larger the entity, the greater	1	0	1	1	1	TRUE	major_paper	NYTIMES.COM	-0.5469	0.159849332084053	0.360033461602948	0.0736134339812206	0.0981366123005026	0.00668720685320782	0.0135996131420818	0.279216269722503	0.00886407031348338	2	0.360033461602948
990	NEW YORK TIMES	The New York Times	Letter	Section A	NA	February 3, 2009	2009	2	110	To the Editor: Further to Frank Rich's Feb. 1	1	0	1	1	1	TRUE	major_paper	NYTIMES.COM	-0.5469	0.272200132094965	0.0295190013784445	0.00921839195837804	0.312299605209366	0.0443970182988141	0.0283444541424511	0.157270109114053	0.146751287803527	4	0.312299605209366
991	NEW YORK TIMES	The New York Times	Newspaper	Section A	NA	January 21, 2014	2014	1	49	Maureen Brown can tell stories about kittens. H	1	0	1	1	1	TRUE	major_paper	NYTIMES.COM	-0.5469	0.00219393947108265	0.0156772847737563	0.0173139842384465	0.00889825004526589	0.0120320793142818	0.836260639491288	0.107094246126528	0.000529576539351841	6	0.836260639491288
992	NEW YORK TIMES	The New York Times	Newspaper	Section 14NJ	NA	March 25, 2007	2007	3	135	DATELINE: TRENTON WHEN Jennifer Velez, the act	1	0	1	1	1	TRUE	major_paper	NYTIMES.COM	-0.5469	0.0668882148311566	0.247814447288864	0.303413373600906	0.0190286798280356	0.0144296178935291	0.169920097431319	0.145213713316028	0.0332918558101606	3	0.303413373600906
993	NEW YORK TIMES	The New York Times	Op-Ed	Section SR	NA	January 8, 2012	2012	1	73	MANCHESTER, N.H. RICK SANTORUM was locking down	1	0	1	1	1	TRUE	major_paper	NYTIMES.COM	-0.5469	0.361929516212274	0.0435169364784911	0.0209635673550082	0.0173918306433055	0.0282351287365392	0.153558605129268	0.346775138444773	0.0276292770003411	1	0.361929516212274
994	NEW YORK TIMES	The New York Times	NA	Section 1	NA	July 19, 1997	1997	7	259	DATELINE: WASHINGTON, July 18 Stepping up the	1	0	1	1	1	TRUE	major_paper	NYTIMES.COM	-0.5469	0.0643665028843173	0.0490323859565043	0.332811155534477	0.137787078356863	0.00120672852825108	0.00272124550216056	0.0108079595052871	0.40126694373214	8	0.40126694373214
995	NEW YORK TIMES	The New York Times	Summary	Section A	NA	December 27, 1997	1997	12	264	INTERNATIONAL A3-6 Laotian Refugees Suffer	1	0	1	1	1	TRUE	major_paper	NYTIMES.COM	-0.5469	0.292035751445149	0.296911997855276	0.0155695528483035	0.0780027844067225	0.157110580236572	0.073756226753228	0.0658985116409269	0.0207145948138216	2	0.296911997855276
996	NEW YORK TIMES	The New York Times	Review		NA	February 14, 1992	1992	2	314	NBC's "In the Best Interest of the Children," on	1	0	1	1	1	TRUE	major_paper	NYTIMES.COM	-0.5469	0.143670275115603	0.053389529256606	0.0426709439788937	0.0134048491676526	0.0618764589665584	0.241726056917929	0.437257340357354	0.00600454623940261	7	0.437257340357354
997	NEW YORK TIMES	The New York Times	Letter	Section A	NA	August 19, 2005	2005	8	164	To the Editor: I agree that Congress should ma	1	0	1	1	1	TRUE	major_paper	NYTIMES.COM	-0.5469	0.0397851775667282	0.0301065570274956	0.222666070820346	0.21731079625455	0.00308919346860326	0.0139635152027587	0.121511964107826	0.351566725551692	8	0.351566725551692
998	NEW YORK TIMES	The New York Times	Newspaper	Section A	NA	May 11, 2015	2015	5	41	The fast-food workers converged on Union Square	1	0	1	1	1	TRUE	major_paper	NYTIMES.COM	-0.5469	0.185316046425256	0.254845267158092	0.0226933477838991	0.328588308063645	0.00820785014057183	0.0785013847963369	0.0897056514428656	0.0321421441893332	4	0.328588308063645
999	NEW YORK TIMES	The New York Times	Summary	Section A	NA	January 26, 1999	1999	1	229	A Federal judge barred the Giuliani administratio	1	0	1	1	1	TRUE	major_paper	NYTIMES.COM	-0.5469	0.0232399075004682	0.470114948667349	0.35789679754131	0.0371507888399936	0.0138625558357241	0.0277061545626072	0.0326835581324616	0.0373452889200861	2	0.470114948667349
1000	NEW YORK TIMES	The New York Times	Letter	Section 14WC	NA	December 11, 2005	2005	12	168	To the Editor: Representative Sue Kelly's ambi	1	0	1	1	1	TRUE	major_paper	NYTIMES.COM	-0.5469	0.166235372742627	0.120661689531603	0.0760940489614175	0.0965307069402145	0.0666277432101727	0.0520862390534546	0.166508938566771	0.255255260993739	8	0.255255260993739
1001	NEW YORK TIMES	The New York Times	Newspaper		NA	January 10, 2004	2004	1	169	Patricia Cruz knows she has a weighty responsibi	1	0	1	1	1	TRUE	major_paper	NYTIMES.COM	-0.5469	0.00207284400539846	0.0213150350214656	0.0154445338565839	0.00515249965954318	0.011477875213083	0.762575119817426	0.181542233115782	0.000419859310717635	6	0.762575119817426
1002	NEW YORK TIMES	The New York Times	Review	Section 7	NA	March 21, 2004	2004	3	171	LIFE ON THE OUTSIDE The Prison Odyssey of Elai	1	0	1	1	1	TRUE	major_paper	NYTIMES.COM	-0.5469	0.0519804698854975	0.0904253515128493	0.101182533771609	0.106430062845205	0.209661787801028	0.156455919495676	0.270970157076695	0.0128937176114412	7	0.270970157076695
1003	NEW YORK TIMES	The New York Times	Op-Ed		NA	August 19, 2001	2001	8	212	DATELINE: WASHINGTON An absurd debate is going	1	0	1	1	1	TRUE	major_paper	NYTIMES.COM	-0.5469	0.0566245118741469	0.00955535807100312	0.0180121601891093	0.555609416921221	0.00137522542152253	0.00252469045207677	0.0577857869069985	0.298512850163922	4	0.555609416921221
1004	NEW YORK TIMES	The New York Times	Biography	Section A	NA	June 24, 1992	1992	6	318	DATELINE: LOS ANGELES, June 23 Terry Watkins	1	0	1	1	1	TRUE	major_paper	NYTIMES.COM	-0.5469	0.0662827104584059	0.141727344699767	0.0160935103743894	0.040259706997127	0.104821823549424	0.175631597140028	0.441152220614118	0.0140310861667404	7	0.441152220614118
1005	NEW YORK TIMES	The New York Times	Summary	Section A	NA	April 5, 1995	1995	4	280	International A3-13 MOVES AGAINST MIDEAST FOE	1	0	1	1	1	TRUE	major_paper	NYTIMES.COM	-0.5469	0.39623743752017	0.130126198416682	0.0516291184367296	0.0304996898291538	0.181506689397356	0.0332470502635934	0.111444317873553	0.0653094982627631	1	0.39623743752017
1006	NEW YORK TIMES	The New York Times	NA	Section A	NA	November 10, 1995	1995	11	287	DATELINE: WASHINGTON, Nov. 9 The Clinton Admi	1	0	1	1	1	TRUE	major_paper	NYTIMES.COM	-0.5469	0.120425778981347	0.0130398356166725	0.305020173204445	0.0748435007205363	0.00076586671476404	0.00445072787084418	0.0321156587805808	0.449338458110811	8	0.449338458110811
1007	NEW YORK TIMES	The New York Times	Newspaper		NA	August 2, 2012	2012	8	80	WASHINGTON -- When Representative Frank D. Lucas	1	0	1	1	1	TRUE	major_paper	NYTIMES.COM	-0.5469	0.154283953759947	0.055925366771474	0.0174274812120676	0.0155221031339863	0.0730629414758858	0.0359982077371764	0.293066682892306	0.354713263017156	8	0.354713263017156
1008	NEW YORK TIMES	The New York Times	Newspaper	Section ST	NA	January 24, 2016	2016	1	25	There remains some argument among lawmakers ove	1	0	1	1	1	TRUE	major_paper	NYTIMES.COM	-0.5469	0.215690804812977	0.00607504801998039	0.160928349778187	0.495829573732055	0.00106189152891555	0.0642689826671725	0.0342679145101412	0.0218774349505713	4	0.495829573732055
1009	NEW YORK TIMES	The New York Times	NA		NA	July 13, 1997	1997	7	259	THE work often takes place before daybreak; the	1	0	1	1	1	TRUE	major_paper	NYTIMES.COM	-0.5469	0.160139855567745	0.294371595663947	0.0346795657044761	0.0380304675249809	0.0176462357863127	0.0718751031525432	0.371524209615281	0.0117329669847134	7	0.371524209615281
1010	NEW YORK TIMES	The New York Times	Op-Ed	Section A	NA	July 13, 2015	2015	7	43	Americans work longer hours than their counterpa	1	0	1	1	1	TRUE	major_paper	NYTIMES.COM	-0.5469	0.256327359701863	0.00707561013935511	0.0577312740235725	0.448081722000463	0.00121182243140664	0.0136900873235316	0.198536757420031	0.0173453669597757	4	0.448081722000463
1011	NEW YORK TIMES	The New York Times	Editorial	Section A	NA	July 31, 2000	2000	7	223	In its eagerness to end what it sees as a cycle	1	0	1	1	1	TRUE	major_paper	NYTIMES.COM	-0.5469	0.00771933374058002	0.410990370319313	0.503351894379654	0.0206183052156806	0.00508004313383261	0.0143228703360635	0.0307381976963951	0.00717898517848115	3	0.503351894379654
1012	NEW YORK TIMES	The New York Times	Newspaper	Section A	NA	January 18, 2015	2015	1	37	Masicqua Andrews scoffs at the mention of famil	1	0	1	1	1	TRUE	major_paper	NYTIMES.COM	-0.5469	0.00197409428049604	0.0401883525750592	0.00886313608408713	0.00620068243220085	0.0231222450339729	0.815076259385757	0.104260490164909	0.000314740043518417	6	0.815076259385757
1013	NEW YORK TIMES	The New York Times	Newspaper	Section A	NA	November 21, 2015	2015	11	47	After her lifelong disability worsened, Carmen G	1	0	1	1	1	TRUE	major_paper	NYTIMES.COM	-0.5469	0.00426218705547822	0.0671889126884315	0.0224673089947936	0.0900810415183258	0.0226024718290959	0.606871048782803	0.184202824076977	0.00232420505409541	6	0.606871048782803
1014	NEW YORK TIMES	The New York Times	NA	Section A	NA	July 22, 1996	1996	7	271	DATELINE: WASHINGTON, July 21 Vice President A	1	0	1	1	1	TRUE	major_paper	NYTIMES.COM	-0.5469	0.316035047629515	0.0198041255917381	0.250597278459381	0.00988438940778995	0.00164649949177633	0.00900054005978851	0.055972513973131	0.337059605386879	8	0.337059605386879
1015	NEW YORK TIMES	The New York Times	Op-ed		NA	July 27, 1991	1991	7	331	Not much has changed since the last time Margare	1	0	1	1	1	TRUE	major_paper	NYTIMES.COM	-0.5469	0.00840927921620512	0.0278982553948127	0.0278833593625232	0.00986268232446278	0.0154646252850067	0.278679040461228	0.630370701219152	0.00143205673661029	7	0.630370701219152
1016	NEW YORK TIMES	The New York Times	A Special Report		NA	July 28, 1991	1991	7	331	DATELINE: NEW BEDFORD, Mass. The experts say	1	0	1	1	1	TRUE	major_paper	NYTIMES.COM	-0.5469	0.00464891788845719	0.105225070067544	0.0294314037801231	0.477263543149703	0.0953465846017835	0.100353816368123	0.167711831808833	0.0200188323354325	4	0.477263543149703
1017	NEW YORK TIMES	The New York Times	Newspaper	Section A	NA	September 5, 2012	2012	9	81	Worried that children were losing the war on ob	1	0	1	1	1	TRUE	major_paper	NYTIMES.COM	-0.5469	0.012217114021351	0.384342361493662	0.282735107147841	0.0744605433712123	0.00482738074916911	0.0456060691380106	0.180789278067446	0.0150221460113079	2	0.384342361493662
1018	NEW YORK TIMES	The New York Times	Newspaper		NA	April 19, 2013	2013	4	64	Its friendly name and sizable budget suggest an	1	0	1	1	1	TRUE	major_paper	NYTIMES.COM	-0.5469	0.322723160568783	0.353258313341497	0.0139301194240926	0.00739219956287504	0.0184589388072074	0.137047428260691	0.133564960328948	0.0136248797059059	2	0.353258313341497
1019	NEW YORK TIMES	The New York Times	Editorial	Section A	NA	December 12, 1995	1995	12	288	Haley Barbour, chairman of the Republican Party,	1	0	1	1	1	TRUE	major_paper	NYTIMES.COM	-0.5469	0.131041359358498	0.00672485579464582	0.0134856131859761	0.0807685269330538	0.000860608957344287	0.000859527117314008	0.0236515166671672	0.742607991986001	8	0.742607991986001
1020	NEW YORK TIMES	The New York Times	NA	Section 1	NA	February 22, 1997	1997	2	254	DATELINE: ALBANY, Feb. 21 Defying claims to th	1	0	1	1	1	TRUE	major_paper	NYTIMES.COM	-0.5469	0.0167356879738423	0.230072980776948	0.59879830263344	0.08767838965971	0.00710384697123102	0.0372888083013926	0.0132530354348919	0.00906894824854419	3	0.59879830263344
1021	NEW YORK TIMES	The New York Times	Newspaper	Section A	NA	April 14, 2012	2012	4	76	WASHINGTON -- House Republicans return from spr	1	0	1	1	1	TRUE	major_paper	NYTIMES.COM	-0.5469	0.0678945691080507	0.0273976633970338	0.0473333264170098	0.140721812604993	0.00180704666303432	0.0029348924775468	0.0321719991898174	0.679738690142514	8	0.679738690142514
1022	NEW YORK TIMES	The New York Times	Editorial	Section A	NA	April 11, 1997	1997	4	256	Congressional and White House negotiators will m	1	0	1	1	1	TRUE	major_paper	NYTIMES.COM	-0.5469	0.270805262953136	0.0180603602766364	0.183382529681109	0.0247613625885314	0.0012854842390872	0.00302650836463781	0.0318843337277537	0.466794158169109	8	0.466794158169109
1023	NEW YORK TIMES	The New York Times	Newspaper	Section A	NA	August 20, 2011	2011	8	92	Federal officials on Friday rejected Mayor Micha	1	0	1	1	1	TRUE	major_paper	NYTIMES.COM	-0.5469	0.0414165166679447	0.4317427577565	0.258329724993458	0.0637287894924621	0.00735374737446827	0.0122549073651196	0.115835000853278	0.0693385554967684	2	0.4317427577565
1024	NEW YORK TIMES	The New York Times	NA	Section 13CN	NA	March 30, 1997	1997	3	255	DEBORAH DANE found her life turned upside down w	1	0	1	1	1	TRUE	major_paper	NYTIMES.COM	-0.5469	0.0153083325519795	0.108272114723645	0.493093705772146	0.0253237248744104	0.00447119395338633	0.220425231262124	0.0527115785165911	0.080394118345718	3	0.493093705772146
1025	NEW YORK TIMES	The New York Times	NA	Section A	NA	April 8, 1997	1997	4	256	DATELINE: WASHINGTON, April 7 Republicans sai	1	0	1	1	1	TRUE	major_paper	NYTIMES.COM	-0.5469	0.132679530979164	0.225415410351657	0.433703053759722	0.00854873135535807	0.00568390703584428	0.00442452759335996	0.0104627113168676	0.179082127608027	3	0.433703053759722
1026	NEW YORK TIMES	The New York Times	Newspaper	Section A	NA	December 25, 2012	2012	12	84	Jose Valentin is the head of a four-person hous	1	0	1	1	1	TRUE	major_paper	NYTIMES.COM	-0.5469	0.00235421690658209	0.0404547933413223	0.0226541886310375	0.00581335354878033	0.00941783156522509	0.834339186019709	0.0844784590246698	0.000487970962674351	6	0.834339186019709
1027	NEW YORK TIMES	The New York Times	Biography		NA	March 16, 1997	1997	3	255	It was a few weeks after his inauguration, and	1	0	1	1	1	TRUE	major_paper	NYTIMES.COM	-0.5469	0.499221081746387	0.0742372031971345	0.0284335542952481	0.0164864248736613	0.0209096274000636	0.0299635462031816	0.256457061943252	0.0742915003410721	1	0.499221081746387
1028	NEW YORK TIMES	The New York Times	NA		NA	February 17, 1995	1995	2	278	To some, Gregory N. could be considered an easy	1	0	1	1	1	TRUE	major_paper	NYTIMES.COM	-0.5469	0.0242556031325231	0.0813221455114364	0.108723657786896	0.0181947138849043	0.00912841520439	0.509573433403859	0.239827008502928	0.00897502257306264	6	0.509573433403859
1029	NEW YORK TIMES	The New York Times	Newspaper		NA	December 22, 2005	2005	12	168	DATELINE: COLUMBIA, S.C., Dec. 14 The hurrica	1	0	1	1	1	TRUE	major_paper	NYTIMES.COM	-0.5469	0.0216885208135621	0.182032897259333	0.03088007422788	0.00850945855157143	0.11140658065943	0.338940593370251	0.302967542194206	0.00357433292376604	6	0.338940593370251
1030	NEW YORK TIMES	The New York Times	Newspaper	Section A	NA	December 1, 2011	2011	12	96	In early 2008, Joel Elveson was at the top of h	1	0	1	1	1	TRUE	major_paper	NYTIMES.COM	-0.5469	0.00235936179832972	0.070916416288361	0.0260844658636582	0.0384887330056869	0.00946202398262983	0.780248120745453	0.0713684177721775	0.00107246054370397	6	0.780248120745453
1031	NEW YORK TIMES	The New York Times	NA	Section D	NA	December 21, 1994	1994	12	300	DATELINE: WASHINGTON, Dec. 20 The Energy Depar	1	0	1	1	1	TRUE	major_paper	NYTIMES.COM	-0.5469	0.0212022210113501	0.282651216287035	0.065449227005172	0.0433429843462487	0.00511723408222042	0.00348623792450277	0.038674803715221	0.54007607562825	8	0.54007607562825
1032	NEW YORK TIMES	The New York Times	NA	Section B	NA	December 30, 1997	1997	12	264	For more than seven years, Jose Rodriguez used a	1	0	1	1	1	TRUE	major_paper	NYTIMES.COM	-0.5469	0.00603516161207262	0.653592653609539	0.12805854467533	0.0232086153553951	0.0722545752056021	0.059466973425786	0.0498243371937399	0.00755913892253534	2	0.653592653609539
1033	NEW YORK TIMES	The New York Times	NA	Section A	NA	June 19, 1997	1997	6	258	DATELINE: WASHINGTON, June 18 The Senate Fina	1	0	1	1	1	TRUE	major_paper	NYTIMES.COM	-0.5469	0.0542265897303906	0.046946871089514	0.208627483915405	0.0915290025898672	0.00136063783107317	0.00203391651334542	0.0106886589796148	0.584586839350789	8	0.584586839350789
1034	NEW YORK TIMES	The New York Times	Editorial	Section A	NA	May 1, 2015	2015	5	41	It is hard to overstate the extent to which work	1	0	1	1	1	TRUE	major_paper	NYTIMES.COM	-0.5469	0.00909408993120181	0.0313593582360511	0.2165633384638	0.67158047294507	0.000934344023640197	0.00685783143404707	0.0157245236530361	0.0478860413131541	4	0.67158047294507
1035	NEW YORK TIMES	The New York Times	Newspaper	Section A	NA	September 8, 2005	2005	9	165	DATELINE: CHICAGO, Sept. 7 Two weeks from the	1	0	1	1	1	TRUE	major_paper	NYTIMES.COM	-0.5469	0.024756145065979	0.162291616340265	0.00577311874333932	0.236322702926367	0.124675789799218	0.0058432278448162	0.0770658168475225	0.363271582432494	8	0.363271582432494
1036	NEW YORK TIMES	The New York Times	Letter	Section 4	NA	November 15, 1998	1998	11	251	To the Editor: New York City's diversion of ne	1	0	1	1	1	TRUE	major_paper	NYTIMES.COM	-0.5469	0.118917659158543	0.256411059390127	0.307584927267817	0.0235063797449559	0.0337031628891852	0.185888617154625	0.0476815123062176	0.0263066820885295	3	0.307584927267817
1037	NEW YORK TIMES	The New York Times	Interview		NA	May 17, 1998	1998	5	245	SINCE 1978, Peter Rosazza has served as auxilia	1	0	1	1	1	TRUE	major_paper	NYTIMES.COM	-0.5469	0.177806766263885	0.0388023683681324	0.110872477927774	0.0173227792879167	0.0239236441547198	0.238742900902011	0.387010426120607	0.00551863697495552	7	0.387010426120607
1038	NEW YORK TIMES	The New York Times	NA		NA	October 27, 1996	1996	10	274	The Around the Clock deli opened on 106th Street	1	0	1	1	1	TRUE	major_paper	NYTIMES.COM	-0.5469	0.0231930286042689	0.382834351962609	0.0198182910728126	0.0188329233734473	0.146233026016713	0.111906346009128	0.291630129794762	0.00555190316625852	2	0.382834351962609
1039	NEW YORK TIMES	The New York Times	Newspaper		NA	December 8, 2005	2005	12	168	In the shopping centers of Boca Raton, Fla., the	1	0	1	1	1	TRUE	major_paper	NYTIMES.COM	-0.5469	0.0157234497390764	0.288952272676154	0.0871141745198767	0.317028945360225	0.0187776076055169	0.077099498054142	0.148887064582018	0.0464169874629911	4	0.317028945360225
1040	NEW YORK TIMES	The New York Times	Newspaper	Section 1	NA	October 31, 2004	2004	10	178	Around the corner from a multimillion-dollar ho	1	0	1	1	1	TRUE	major_paper	NYTIMES.COM	-0.5469	0.00816633996979032	0.0511726331386257	0.0513388893953362	0.116469421091783	0.0198914010785296	0.666025547274741	0.0830827942323747	0.00385297381881919	6	0.666025547274741
1041	NEW YORK TIMES	The New York Times	Newspaper	Section A	NA	May 18, 2014	2014	5	53	LAREDO, Tex. -- The state's standardized test a	1	0	1	1	1	TRUE	major_paper	NYTIMES.COM	-0.5469	0.144232771804023	0.190717485370887	0.00936900073373792	0.0762617322408203	0.108089615577672	0.0787327864084921	0.387134482194789	0.0054621256695791	7	0.387134482194789
1042	NEW YORK TIMES	The New York Times	Series Biography		NA	January 12, 1997	1997	1	253	THE first time I visited Edinburgh, during a se	1	0	1	1	1	TRUE	major_paper	NYTIMES.COM	-0.5469	0.346848681115598	0.0624928699254158	0.0815684993429198	0.067073791713416	0.0500191933009557	0.0471733860862371	0.298801525361048	0.0460220531544099	1	0.346848681115598
1043	NEW YORK TIMES	The New York Times	Newspaper	Section 14LI	NA	June 17, 2007	2007	6	138	DATELINE: MINEOLA, N.Y. IT'S not a lot. ''It	1	0	1	1	1	TRUE	major_paper	NYTIMES.COM	-0.5469	0.00418747582073489	0.0323998180293631	0.00953454281845005	0.0100869838773486	0.0262717153570894	0.253210469970095	0.662902254674021	0.00140673945289795	7	0.662902254674021
1044	NEW YORK TIMES	The New York Times	Obituary (Obit); Biography		NA	June 6, 2004	2004	6	174	s Ronald Wilson Reagan, a former film star who b	1	0	1	1	1	TRUE	major_paper	NYTIMES.COM	-0.5469	0.501777665054083	0.0903504522367314	0.00488232598636149	0.0610545805272221	0.0704578527616397	0.0520481300779691	0.122030231002524	0.0973987623534695	1	0.501777665054083
1045	NEW YORK TIMES	The New York Times	NA		NA	February 6, 1991	1991	2	326	DATELINE: WASHINGTON, Feb. 5 President Bush's	1	0	1	1	1	TRUE	major_paper	NYTIMES.COM	-0.5469	0.222143632673247	0.0896586418881106	0.271444134116436	0.00973780583659731	0.00546335909623569	0.004473971797357	0.0279893271593502	0.369089127432666	8	0.369089127432666
1046	NEW YORK TIMES	The New York Times	Letter	Section 4	NA	May 9, 1999	1999	5	233	To the Editor: Re "Doubts Surface Over Raise B	1	0	1	1	1	TRUE	major_paper	NYTIMES.COM	-0.5469	0.215110751640114	0.123968227016508	0.0575468173622776	0.415329881721045	0.0106935497068861	0.006522417961938	0.0280593957922032	0.142768958799029	4	0.415329881721045
1047	NEW YORK TIMES	The New York Times	Summary	Section A	NA	April 30, 1999	1999	4	232	INTERNATIONAL A3-17 Bombing Unites Serb Army	1	0	1	1	1	TRUE	major_paper	NYTIMES.COM	-0.5469	0.204976117365585	0.333453997845933	0.0222132833969017	0.0970418259739716	0.232915979634457	0.0236190170627519	0.0478878430796574	0.0378919356407426	2	0.333453997845933
1048	NEW YORK TIMES	The New York Times	Review		NA	September 17, 1992	1992	9	321	The soft spot that television news usually shows	1	0	1	1	1	TRUE	major_paper	NYTIMES.COM	-0.5469	0.0237668011791387	0.140340743405875	0.227414528786668	0.0919226529689965	0.0106983261219576	0.0587055008521834	0.432881080435128	0.0142703662500527	7	0.432881080435128
1049	NEW YORK TIMES	The New York Times	Editorial	Section A	NA	August 13, 2012	2012	8	80	Less than 24 hours after Mitt Romney chose Paul	1	0	1	1	1	TRUE	major_paper	NYTIMES.COM	-0.5469	0.313538709497074	0.0116025208069166	0.0966649157145324	0.138297217515656	0.00161665354021694	0.0152637599982195	0.0961239979163478	0.326892225011036	8	0.326892225011036
1050	NEW YORK TIMES	The New York Times	Editorial	Section 4	NA	May 9, 1999	1999	5	233	When Congress makes a mistake that inflicts undu	1	0	1	1	1	TRUE	major_paper	NYTIMES.COM	-0.5469	0.0989189898620635	0.244846268777552	0.395697077786845	0.0314085213828733	0.0262501631002869	0.0160434444612752	0.0256295870125441	0.16120594761656	3	0.395697077786845
1051	NEW YORK TIMES	The New York Times	Newspaper	Section A	NA	January 16, 2015	2015	1	37	Along with all the demands and unpredictability	1	0	1	1	1	TRUE	major_paper	NYTIMES.COM	-0.5469	0.00191300738350228	0.00638261881836915	0.0228122972978482	0.00687878719506917	0.00330141927163736	0.822108720101527	0.136194315282658	0.000408834649388858	6	0.822108720101527
1052	NEW YORK TIMES	The New York Times	Op-Ed	Section A	NA	November 18, 2011	2011	11	95	It's a bird! It's a plane! It's a complete turke	1	0	1	1	1	TRUE	major_paper	NYTIMES.COM	-0.5469	0.333653322652951	0.00590170817076681	0.0117039842205699	0.116214833804024	0.00129803407270462	0.00284461860535564	0.179165350988848	0.34921814748478	8	0.34921814748478
1053	NEW YORK TIMES	The New York Times	NA		NA	January 28, 1998	1998	1	241	Watching with a contagious interest in nuance a	1	0	1	1	1	TRUE	major_paper	NYTIMES.COM	-0.5469	0.36649931525604	0.0909732106380484	0.00770475735668648	0.0213920267929307	0.0131118890838569	0.0531919033770492	0.419061967204964	0.0280649302904249	7	0.419061967204964
1054	NEW YORK TIMES	The New York Times	Review		NA	February 10, 1997	1997	2	254	WHAT IT MEANS TO BE A LIBERTARIAN A Personal I	1	0	1	1	1	TRUE	major_paper	NYTIMES.COM	-0.5469	0.387917029473529	0.043415413552949	0.106079851418829	0.22425073040254	0.0189862774525157	0.0156883710638328	0.164459088793839	0.0392032378419659	1	0.387917029473529
1055	NEW YORK TIMES	The New York Times	NA	Section 13WC	NA	February 27, 1994	1994	2	290	DATELINE: EASTCHESTER WHILE the Administratio	1	0	1	1	1	TRUE	major_paper	NYTIMES.COM	-0.5469	0.00660383477101403	0.188271444739401	0.377951370413562	0.0492456492639355	0.0156828980919964	0.162177300235334	0.179520764007668	0.0205467384770902	3	0.377951370413562
1056	NEW YORK TIMES	The New York Times	NA	Section A	NA	May 16, 1990	1990	5	341	DATELINE: WASHINGTON, May 15 President Bush o	1	0	1	1	1	TRUE	major_paper	NYTIMES.COM	-0.5469	0.330993650427871	0.0824720918797869	0.0190305351071255	0.129673096797388	0.00421733518962789	0.00271818566062698	0.0493238326726153	0.381571272264959	8	0.381571272264959
1057	NEW YORK TIMES	The New York Times	Newspaper	Section B	NA	March 17, 2014	2014	3	51	CHATTANOOGA, Tenn. -- At 7 in the morning, they	1	0	1	1	1	TRUE	major_paper	NYTIMES.COM	-0.5469	0.00317588858240299	0.0173804179420048	0.0428231962761348	0.263263982103561	0.0341099366770937	0.360546984246227	0.274909074540599	0.00379051963197602	6	0.360546984246227
1058	NEW YORK TIMES	The New York Times	NA		NA	July 4, 1990	1990	7	343	THE problem: The earnings gap between those who	1	0	1	1	1	TRUE	major_paper	NYTIMES.COM	-0.5469	0.0652629801832793	0.0382870923948457	0.0771675117138119	0.568792125641004	0.00268088968307895	0.00801712967094358	0.0685752040028939	0.171217066710143	4	0.568792125641004
1059	NEW YORK TIMES	The New York Times	NA	Section A	NA	September 4, 1992	1992	9	321	DATELINE: WASHINGTON, Sept. 3 The number of A	1	0	1	1	1	TRUE	major_paper	NYTIMES.COM	-0.5469	0.104127807325622	0.024112356758796	0.0559178927452648	0.777999299280007	0.0012302940641194	0.00216788840943863	0.00957349148392682	0.024870969932825	4	0.777999299280007
1060	NEW YORK TIMES	The New York Times	A Special Report	Section 1	NA	December 30, 1990	1990	12	348	All across America, state and city governments	1	0	1	1	1	TRUE	major_paper	NYTIMES.COM	-0.5469	0.107126400470471	0.146050075392234	0.25696980192307	0.230916650931042	0.0195417104374724	0.00668793881892112	0.0400527244124523	0.192654697614336	3	0.25696980192307
1061	NEW YORK TIMES	The New York Times	Newspaper	Section A	NA	February 15, 2005	2005	2	158	DATELINE: LITTLE ROCK, Ark., Feb. 14 In front	1	0	1	1	1	TRUE	major_paper	NYTIMES.COM	-0.5469	0.297711285421047	0.0781629844826381	0.170389224127276	0.0548354909896319	0.0545940275772435	0.111554964166175	0.21961059715124	0.0131414260847477	1	0.297711285421047
1062	NEW YORK TIMES	The New York Times	Newspaper	Section A	NA	April 17, 2012	2012	4	76	The number of New Yorkers classified as poor in	1	0	1	1	1	TRUE	major_paper	NYTIMES.COM	-0.5469	0.00511435789346365	0.145660496292085	0.0941592278979884	0.718507067986801	0.00289333975528069	0.00832449248950458	0.0077994628731126	0.017541554811764	4	0.718507067986801
1063	NEW YORK TIMES	The New York Times	Text		NA	September 11, 1992	1992	9	321	PRESIDENT BUSH In a speech to the Detroit Econ	1	0	1	1	1	TRUE	major_paper	NYTIMES.COM	-0.5469	0.329177414286542	0.0173025382097904	0.132250294930806	0.184339375111286	0.00473423009253571	0.109966954191714	0.186408400346296	0.0358207928310299	1	0.329177414286542
1064	NEW YORK TIMES	The New York Times	Newspaper	Section A	NA	December 22, 2012	2012	12	84	Sitting side by side on their living room sofa,	1	0	1	1	1	TRUE	major_paper	NYTIMES.COM	-0.5469	0.0018695221049851	0.0432801385714889	0.0091168915364622	0.004149597803082	0.0111342224095885	0.805362005564357	0.124784703407682	0.000302918602354948	6	0.805362005564357
1065	NEW YORK TIMES	The New York Times	Newspaper	Section A	NA	December 23, 2012	2012	12	84	Things were finally starting to look up for Kim	1	0	1	1	1	TRUE	major_paper	NYTIMES.COM	-0.5469	0.00311388494602703	0.0118265410601957	0.00296948934622596	0.00462213780097352	0.0221175536950377	0.56289688251344	0.39218827297884	0.000265237659260108	6	0.56289688251344
1066	NEW YORK TIMES	The New York Times	Letter	Section A	NA	April 25, 2006	2006	4	148	To the Editor: Re ''Mayor Overrules 2 Aides Se	1	0	1	1	1	TRUE	major_paper	NYTIMES.COM	-0.5469	0.0119633662951927	0.375477741143019	0.171181955178781	0.0910990501701264	0.0172902196790207	0.203870518553859	0.101514734921782	0.0276024140582199	2	0.375477741143019
1067	NEW YORK TIMES	The New York Times	NA	Section B	NA	July 6, 1992	1992	7	319	States in the New York region have historically	1	0	1	1	1	TRUE	major_paper	NYTIMES.COM	-0.5469	0.0051985141380239	0.0887406717796324	0.550032016610249	0.225987831273433	0.00369300351637729	0.084048723536623	0.0154072927138482	0.026891946431813	3	0.550032016610249
1068	NEW YORK TIMES	The New York Times	NA		NA	July 16, 2000	2000	7	223	It isn't easy to plop a giant store that sells 3	1	0	1	1	1	TRUE	major_paper	NYTIMES.COM	-0.5469	0.0946845769374851	0.382438718246297	0.0108346033223842	0.0777259017715913	0.101084790104134	0.0973619837630812	0.219186207354689	0.0166832185003379	2	0.382438718246297
1069	NEW YORK TIMES	The New York Times	NA	Section 1	NA	September 24, 2000	2000	9	225	One morning last week in the Kingsbridge sectio	1	0	1	1	1	TRUE	major_paper	NYTIMES.COM	-0.5469	0.00744513925213011	0.278297118055107	0.16050975133111	0.00861207638561106	0.00963483750385422	0.31066062264997	0.207673872097805	0.017166582724413	6	0.31066062264997
1070	NEW YORK TIMES	The New York Times	List	Section 1	NA	May 24, 1998	1998	5	245	Tally Last Week in Connecticut, New Jersey and N	1	0	1	1	1	TRUE	major_paper	NYTIMES.COM	-0.5469	0.0543188138290058	0.255820563918396	0.0217833178489552	0.010634855078307	0.0287217021989188	0.00216154747578103	0.00769846313663587	0.618860736514	8	0.618860736514
1071	NEW YORK TIMES	The New York Times	Summary	Section A	NA	March 2, 1995	1995	3	279	International A2-10 WINNIE MANDELA'S HOME IS	1	0	1	1	1	TRUE	major_paper	NYTIMES.COM	-0.5469	0.342564290647037	0.134327632792644	0.0135687766234405	0.0171927896710714	0.205392834910973	0.0513330732808175	0.113475726847028	0.122144875226988	1	0.342564290647037
1072	NEW YORK TIMES	The New York Times	Review		NA	May 18, 1997	1997	5	257	THE CLIFF WALK A Memoir of a Job Lost and a Li	1	0	1	1	1	TRUE	major_paper	NYTIMES.COM	-0.5469	0.0475880773880337	0.0346111124892006	0.0104098840329185	0.164885934374527	0.017766273712478	0.157113892412608	0.560208226275894	0.00741659931433955	7	0.560208226275894
1073	NEW YORK TIMES	The New York Times	NA		NA	October 4, 1992	1992	10	322	DATELINE: WASHINGTON WHOEVER is elected Presi	1	0	1	1	1	TRUE	major_paper	NYTIMES.COM	-0.5469	0.317632061114802	0.0134746111669765	0.0182860311888302	0.269004557021363	0.00450529672012567	0.00322966014514324	0.0677283845782669	0.306139398064492	1	0.317632061114802
1074	NEW YORK TIMES	The New York Times	Newspaper	Section 4	NA	March 11, 2007	2007	3	135	THE vestibule of Sunnyside Community Services, i	1	0	1	1	1	TRUE	major_paper	NYTIMES.COM	-0.5469	0.0106277774808255	0.0722782617503392	0.113881406779526	0.0591152692712888	0.00655620636694658	0.246604069514218	0.487096305265128	0.00384070357172862	7	0.487096305265128
1075	NEW YORK TIMES	The New York Times	NA	Section B	NA	February 4, 1999	1999	2	230	Posing as poor people seeking Medicaid, state he	1	0	1	1	1	TRUE	major_paper	NYTIMES.COM	-0.5469	0.00263676553706352	0.606132496201317	0.327020166258235	0.00699754614405582	0.00517316849094316	0.0367778998162104	0.0124166582878663	0.00284529926430884	2	0.606132496201317
1076	NEW YORK TIMES	The New York Times	Review	Section C	NA	March 25, 2009	2009	3	111	A bouncing adolescent with a sly smile bops ons	1	0	1	1	1	TRUE	major_paper	NYTIMES.COM	-0.5469	0.166678894106964	0.038274671735701	0.00409499780511815	0.0282423126525503	0.147572872791228	0.0856763952102191	0.524143711315077	0.0053161443831428	7	0.524143711315077
1077	NEW YORK TIMES	The New York Times	NA	Section A	NA	August 18, 1998	1998	8	248	DATELINE: CHARLOTTE, N.C. Three years ago, Na	1	0	1	1	1	TRUE	major_paper	NYTIMES.COM	-0.5469	0.00480579820542129	0.0188574213135516	0.245765713597796	0.413443601312422	0.0652066309853544	0.113736075570384	0.134130142038032	0.00405461697703901	4	0.413443601312422
1078	NEW YORK TIMES	The New York Times	Letter		NA	October 16, 2000	2000	10	226	To the Editor: Re "Young Blacks Turn to School	1	0	1	1	1	TRUE	major_paper	NYTIMES.COM	-0.5469	0.190754613713665	0.0783610651688275	0.394694721263833	0.0747675330245748	0.0281219232972798	0.0317481536539106	0.143354551589318	0.0581974382885907	3	0.394694721263833
1079	NEW YORK TIMES	The New York Times	Editorial	Section A	NA	December 6, 2011	2011	12	96	The biggest whopper in Mitt Romney's fiscal plan	1	0	1	1	1	TRUE	major_paper	NYTIMES.COM	-0.5469	0.181010513806163	0.00818543102251625	0.110050729887791	0.176661626355256	0.000703645497756603	0.0030625803445269	0.0494643732017625	0.470861099884228	8	0.470861099884228
1080	NEW YORK TIMES	The New York Times	NA	Section A	NA	October 31, 2000	2000	10	226	DATELINE: WASHINGTON, Oct. 30 President Clint	1	0	1	1	1	TRUE	major_paper	NYTIMES.COM	-0.5469	0.209106216038718	0.0625832814831869	0.0189077819122808	0.051557201360535	0.00824545452373088	0.0153393901446361	0.0865986403536438	0.547662034183269	8	0.547662034183269
1081	NEW YORK TIMES	The New York Times	Newspaper	Section B	NA	December 16, 2011	2011	12	96	The Obama administration proposed regulations on	1	0	1	1	1	TRUE	major_paper	NYTIMES.COM	-0.5469	0.0179265834429312	0.184935099193385	0.22387982536897	0.379352619346103	0.0054019377414164	0.0846427260262005	0.0222237031138913	0.0816375057671029	4	0.379352619346103
1082	NEW YORK TIMES	The New York Times	Newspaper	Section A	NA	February 9, 2014	2014	2	50	SAN JUAN, P.R. -- Alexis Sotomayor has many rea	1	0	1	1	1	TRUE	major_paper	NYTIMES.COM	-0.5469	0.0236415012194283	0.209454950950192	0.0331219683324864	0.387951415546349	0.0517552078234226	0.0825554511864367	0.165130277772832	0.0463892271688536	4	0.387951415546349
1083	NEW YORK TIMES	The New York Times	NA	Section D	NA	December 1, 1992	1992	12	324	DATELINE: WASHINGTON, Nov. 30 Victoria Keyes,	1	0	1	1	1	TRUE	major_paper	NYTIMES.COM	-0.5469	0.0236601299916944	0.402377550978714	0.0762533583798126	0.301575405079445	0.0398620098669718	0.0432765534166836	0.0638415487917573	0.0491534434949211	2	0.402377550978714
1084	NEW YORK TIMES	The New York Times	NA		NA	October 27, 1995	1995	10	286	DATELINE: WASHINGTON, Oct. 26 The House of Re	1	0	1	1	1	TRUE	major_paper	NYTIMES.COM	-0.5469	0.171555812548463	0.00459188927383687	0.166318039789272	0.0926604042771443	0.000390353151503081	0.00198416356792367	0.017975711617315	0.544523625774542	8	0.544523625774542
1085	NEW YORK TIMES	The New York Times	Summary	Section 1	NA	March 5, 1994	1994	3	291	EXPLOSION AT THE TWIN TOWERS: CONVICTIONS AND Q	1	0	1	1	1	TRUE	major_paper	NYTIMES.COM	-0.5469	0.0786865189302959	0.395796449948212	0.0488001777047946	0.0476715148956965	0.227497244398218	0.152165677720359	0.0414541231401326	0.00792829326229147	2	0.395796449948212
1086	NEW YORK TIMES	The New York Times	NA		NA	September 10, 1992	1992	9	321	DATELINE: ATLANTA, Sept. 9 Gov. Bill Clinton	1	0	1	1	1	TRUE	major_paper	NYTIMES.COM	-0.5469	0.396595744393965	0.0184544086949814	0.30857023816326	0.0594509922652009	0.0220393060945144	0.0185694765579594	0.0778685015988464	0.0984513322312723	1	0.396595744393965
1087	NEW YORK TIMES	The New York Times	Newspaper	Section A	NA	July 4, 2015	2015	7	43	SAN JUAN, P.R. -- It's the lunch hour at Baker'	1	0	1	1	1	TRUE	major_paper	NYTIMES.COM	-0.5469	0.0251367942125516	0.238673910647391	0.0170069747867818	0.231827668899285	0.026868713328519	0.0699758253040479	0.316641037408639	0.0738690754127851	7	0.316641037408639
1088	NEW YORK TIMES	The New York Times	Newspaper	Section A	NA	October 18, 2011	2011	10	94	It seems a rare act of civic sacrifice: in the	1	0	1	1	1	TRUE	major_paper	NYTIMES.COM	-0.5469	0.0568027474091508	0.0181988797610355	0.0325631961556035	0.234372357097354	0.0019793925817603	0.00402099144280229	0.0585536763473896	0.593508759204904	8	0.593508759204904
1089	NEW YORK TIMES	The New York Times	Newspaper		NA	February 25, 2015	2015	2	38	ROME -- For the past month, as Greece once agai	1	0	1	1	1	TRUE	major_paper	NYTIMES.COM	-0.5469	0.43728013266733	0.0373627435659445	0.0209100627152698	0.257113390919997	0.00341547301448382	0.00504415884421857	0.041911098959316	0.19696293931344	1	0.43728013266733
1090	NEW YORK TIMES	The New York Times	Letter	Section A	NA	July 23, 2016	2016	7	31	To the Editor: Re ''Trump, as Nominee, Vows: 'I	1	0	1	1	1	TRUE	major_paper	NYTIMES.COM	-0.5469	0.587694502901195	0.0154255857406623	0.017531583299816	0.049631611550598	0.0130251691351052	0.0192583438588713	0.286709269431991	0.0107239340817621	1	0.587694502901195
1091	NEW YORK TIMES	The New York Times	Newspaper	Section A	NA	December 27, 2010	2010	12	108	Lydia Monserrate lived in 13 foster homes in the	1	0	1	1	1	TRUE	major_paper	NYTIMES.COM	-0.5469	0.00336209878906215	0.0324857045721911	0.0557464004976199	0.00705791608916858	0.0107246493073424	0.783572023924974	0.10577427961717	0.00127692720247203	6	0.783572023924974
1092	NEW YORK TIMES	The New York Times	News	HEALTH LENGTH: 1801 words HIGHLIGHT: Republican governors want to reverse what they consider an incentive not to work, but critics say putting employment before health care is backward. JACKSONVILLE, Ark. -- On a frigid morning here, Nancy Godinez was piling bread and other staples into her car outside a food pantry. She had lost her job as a custodian, her unemployment checks had run out, and he…	NA	February 25, 2017	2017	2	14	HIGHLIGHT: Republican governors want to revers	1	0	1	1	1	TRUE	major_paper	NYTIMES.COM	-0.5469	0.104383346715309	0.0278585647806966	0.581634778442944	0.0431966555946695	0.00301225013694219	0.0733239652201723	0.112714120389378	0.0538763187198887	3	0.581634778442944
1093	NEW YORK TIMES	The New York Times	NA	Section A	NA	September 20, 2000	2000	9	225	A federal judge in Brooklyn ruled yesterday that	1	0	1	1	1	TRUE	major_paper	NYTIMES.COM	-0.5469	0.0159655070672253	0.485461158384388	0.22996021351006	0.0152448864673331	0.0085251347510924	0.200900279889554	0.0370862815830652	0.00685653834728169	2	0.485461158384388
1094	NEW YORK TIMES	The New York Times	NA	Section A	NA	April 17, 1997	1997	4	256	DATELINE: DETROIT, April 16 Pedro A. Gonzalez	1	0	1	1	1	TRUE	major_paper	NYTIMES.COM	-0.5469	0.0768607055895362	0.283979983739195	0.109353439634437	0.229753381675147	0.11915607299952	0.0224189574319509	0.1022057574579	0.0562717014723134	2	0.283979983739195
1095	NEW YORK TIMES	The New York Times	NA	Section A	NA	March 28, 2000	2000	3	219	Thousands of young adults in New York City's fo	1	0	1	1	1	TRUE	major_paper	NYTIMES.COM	-0.5469	0.00250186477141361	0.0812018457954239	0.266586457806714	0.0272791883553822	0.0053850865014158	0.482293007675311	0.132624062737904	0.00212848635643495	6	0.482293007675311
1096	NEW YORK TIMES	The New York Times	Newspaper		NA	October 19, 2016	2016	10	34	How can it be that the United States spends so	1	0	1	1	1	TRUE	major_paper	NYTIMES.COM	-0.5469	0.0822168210930327	0.0077434762272625	0.239552560350532	0.476214827783809	0.00131140012784424	0.0360394955875716	0.0394177984052665	0.117503620424681	4	0.476214827783809
1097	NEW YORK TIMES	The New York Times	NA		NA	November 13, 1994	1994	11	299	DATELINE: WASHINGTON, Nov. 12 After a campaig	0	0	0	1	1	TRUE	major_paper	NYTIMES.COM	-0.5469	0.229378770304272	0.00513809400100307	0.513301713506583	0.0171000061201286	0.000365690917149133	0.00345071605015011	0.0211588940549005	0.210106115045814	3	0.513301713506583
1098	NEW YORK TIMES	The New York Times	Letter	Section A	NA	September 12, 2013	2013	9	69	To the Editor: Thank you for highlighting the r	1	1	1	1	1	TRUE	major_paper	NYTIMES.COM	-0.5469	0.0560679629802179	0.136431431598021	0.392547542027839	0.142467066208766	0.0300100403551857	0.0731015827221173	0.101380895324366	0.0679934787834871	3	0.392547542027839
1099	NEW YORK TIMES	The New York Times	Newspaper		NA	November 19, 2005	2005	11	167	DATELINE: WASHINGTON, Nov. 18 After forcing t	1	0	1	1	1	TRUE	major_paper	NYTIMES.COM	-0.5469	0.0969332593729514	0.0141343385455059	0.0261737027551142	0.0558271093920622	0.0022061675511883	0.00571024920097838	0.0548620732030577	0.744153099979142	8	0.744153099979142
1100	NEW YORK TIMES	The New York Times	Editorial	Section A	NA	February 21, 1997	1997	2	254	Long before welfare was overhauled by Congress l	1	0	1	1	1	TRUE	major_paper	NYTIMES.COM	-0.5469	0.00768773374618941	0.341465394293595	0.469570631703087	0.102989401471724	0.00665101191633318	0.0305218188252633	0.0291584976904999	0.0119555103533084	3	0.469570631703087
1101	NEW YORK TIMES	The New York Times	Editorial		NA	November 29, 1999	1999	11	239	Poverty remains, at 13 percent of the population	1	0	1	1	1	TRUE	major_paper	NYTIMES.COM	-0.5469	0.0108742535272884	0.0603876299542679	0.137712751769199	0.637433574990701	0.00217102248724912	0.0150332976864519	0.0273426620336934	0.109044807551149	4	0.637433574990701
1102	NEW YORK TIMES	The New York Times	NA	Section B	NA	July 24, 1997	1997	7	259	DATELINE: ALBANY, July 23 New York State is li	1	0	1	1	1	TRUE	major_paper	NYTIMES.COM	-0.5469	0.0936202626747178	0.133872216025086	0.362888796402529	0.028806594514672	0.0164540072829233	0.0314086051644424	0.0724077557273122	0.260541762208317	3	0.362888796402529
1103	NEW YORK TIMES	The New York Times	NA		NA	October 28, 1990	1990	10	346	The woman in the red dress has a look of terrib	1	0	1	1	1	TRUE	major_paper	NYTIMES.COM	-0.5469	0.559781556321069	0.019270529261305	0.0130433058905709	0.0354867730126456	0.0598397038869785	0.0137767107112485	0.280668689517614	0.0181327313985693	1	0.559781556321069
1104	NEW YORK TIMES	The New York Times	Op-Ed	Section A	NA	August 20, 2009	2009	8	116	Although this has certainly been a tough August	1	0	1	1	1	TRUE	major_paper	NYTIMES.COM	-0.5469	0.264831372153613	0.0890398351696444	0.00740376210180526	0.058381781740088	0.0415631604749363	0.0464219133820445	0.47834856178091	0.0140096131969594	7	0.47834856178091
1105	NEW YORK TIMES	The New York Times	Newspaper	Section A	NA	January 14, 2014	2014	1	49	Silence has settled where animated banter and fa	1	0	1	1	1	TRUE	major_paper	NYTIMES.COM	-0.5469	0.00163170153130847	0.0378684315798329	0.0310460037338074	0.0101032441284931	0.00449332701857443	0.867180055080229	0.0471541357059778	0.000523101221776414	6	0.867180055080229
1106	NEW YORK TIMES	The New York Times	NA	Section B	NA	January 27, 1999	1999	1	229	The Giuliani administration reiterated its promi	1	0	1	1	1	TRUE	major_paper	NYTIMES.COM	-0.5469	0.00614886981116126	0.66661212698598	0.276918175200617	0.0163165218905032	0.00560954000548308	0.0104195664279741	0.00837638127767762	0.00959881840060335	2	0.66661212698598
1107	NEW YORK TIMES	The New York Times	NA		NA	November 22, 1998	1998	11	251	DON'T gasp, but the bureaucrats are rolling out	1	0	1	1	1	TRUE	major_paper	NYTIMES.COM	-0.5469	0.0179692812653485	0.241933926202644	0.493955768423189	0.0475680788334981	0.0121305424952242	0.047238947306486	0.130307535560882	0.00889591991272842	3	0.493955768423189
1108	NEW YORK TIMES	The New York Times	NA	Section 1	NA	June 3, 1990	1990	6	342	DATELINE: PHILADELPHIA, June 2 Zoraida Felici	1	0	1	1	1	TRUE	major_paper	NYTIMES.COM	-0.5469	0.0113617210107486	0.0996239223683388	0.367346752572874	0.194960582702011	0.0371210163706886	0.0899274447420031	0.193414489028987	0.00624407120434895	3	0.367346752572874
1109	NEW YORK TIMES	The New York Times	Special Report		NA	June 30, 1997	1997	6	258	DATELINE: WASHINGTON, June 29 The nation's 62	1	0	1	1	1	TRUE	major_paper	NYTIMES.COM	-0.5469	0.0455772078086235	0.04770051288037	0.623140777116991	0.124162790258272	0.00442465946535302	0.0388814442351575	0.0920401779398966	0.0240724302953359	3	0.623140777116991
1110	NEW YORK TIMES	The New York Times	NA	Section A	NA	September 22, 1999	1999	9	237	DATELINE: WASHINGTON, Sept. 21 Releasing a rep	1	0	1	1	1	TRUE	major_paper	NYTIMES.COM	-0.5469	0.436712521976825	0.17086282981427	0.00947348277513661	0.0820444165335644	0.0502313142593601	0.00586396476807789	0.0498585955216628	0.194952874351103	1	0.436712521976825
1111	NEW YORK TIMES	The New York Times	Series	Section 1	NA	October 10, 1999	1999	10	238	Wisconsin, of all places, suddenly has the jitt	1	0	1	1	1	TRUE	major_paper	NYTIMES.COM	-0.5469	0.0887380411017474	0.077056838983157	0.456248311364775	0.0284308759780784	0.00409844491461317	0.136129023507791	0.20234237727602	0.00695608687381801	3	0.456248311364775
1112	NEW YORK TIMES	The New York Times	NA		NA	February 24, 1998	1998	2	242	Marga Diaz will readily admit to a few unwise de	1	0	1	1	1	TRUE	major_paper	NYTIMES.COM	-0.5469	0.00339949297197353	0.0713255091183232	0.0570156809452403	0.00955275689855333	0.0314319012096474	0.705589780250057	0.120127386084179	0.00155749252202552	6	0.705589780250057
1113	NEW YORK TIMES	The New York Times	Editorial		NA	May 26, 2017	2017	5	17	HIGHLIGHT: Hounding struggling people, sometime	1	0	1	1	1	TRUE	major_paper	NYTIMES.COM	-0.5469	0.265872675934232	0.218957678962978	0.0363838522122951	0.14655177415872	0.0119358613048676	0.17141481937891	0.12577425297066	0.0231090850773374	1	0.265872675934232
1114	NEW YORK TIMES	The New York Times	Op-Ed	Section A	NA	April 3, 2014	2014	4	52	We in the United States grow up celebrating ours	1	0	1	1	1	TRUE	major_paper	NYTIMES.COM	-0.5469	0.219495978477148	0.0511098066420847	0.0500998475992174	0.521943441249534	0.0173622875146352	0.0130035952392895	0.11429559161552	0.0126894516625713	4	0.521943441249534
1115	NEW YORK TIMES	The New York Times	Newspaper	Section A	NA	February 14, 2009	2009	2	110	On its way to becoming law, two crucial things	1	0	1	1	1	TRUE	major_paper	NYTIMES.COM	-0.5469	0.0210903430812135	0.0567091959159376	0.117451152340058	0.216084346233637	0.00670622057168359	0.00794343258160745	0.0455682353786134	0.52844707389725	8	0.52844707389725
1116	NEW YORK TIMES	The New York Times	Summary	Section 1	NA	July 5, 1997	1997	7	259	INTERNATIONAL 2-5 Russian Depression at En	1	0	1	1	1	TRUE	major_paper	NYTIMES.COM	-0.5469	0.231909955229456	0.304803444747631	0.0145156170010962	0.0808708930719878	0.212884662963056	0.0447942722438368	0.0648978593397541	0.0453232954031818	2	0.304803444747631
1117	NEW YORK TIMES	The New York Times	NA	Section 1	NA	November 28, 1993	1993	11	311	DATELINE: WASHINGTON, Nov. 27 As part of its	1	0	1	1	1	TRUE	major_paper	NYTIMES.COM	-0.5469	0.141213480015023	0.094040550232595	0.53777114830556	0.102386778494798	0.00204869565485243	0.00532209354640407	0.0440394742315567	0.0731777795192104	3	0.53777114830556
1118	NEW YORK TIMES	The New York Times	Op-Ed		NA	March 21, 2002	2002	3	195	DATELINE: WASHINGTON After barely two minutes	1	0	1	1	1	TRUE	major_paper	NYTIMES.COM	-0.5469	0.0506749082177723	0.068698777089009	0.396914136781734	0.0337840515068436	0.119722559174445	0.15864214712493	0.0864066027293191	0.0851568173759471	3	0.396914136781734
1119	NEW YORK TIMES	The New York Times	Newspaper	Section A	NA	January 9, 2012	2012	1	73	In the Cordis family, the two daughters, Judy,	1	0	1	1	1	TRUE	major_paper	NYTIMES.COM	-0.5469	0.00224427474632998	0.0365220652703996	0.0134560180800821	0.0107919655492185	0.0394833998491382	0.808471606340422	0.0885644200836812	0.000466250080728039	6	0.808471606340422
1120	NEW YORK TIMES	The New York Times	News; Series	Section A	NA	May 10, 2014	2014	5	53	MORENO VALLEY, Calif. -- The freeway exits arou	1	0	1	1	1	TRUE	major_paper	NYTIMES.COM	-0.5469	0.00334702158505679	0.0568687072295732	0.0332213213683298	0.247433803049735	0.0178385468640612	0.258934333895238	0.380841914962674	0.00151435104533222	7	0.380841914962674
1121	NEW YORK TIMES	The New York Times	Newspaper	Section A	NA	November 23, 2016	2016	11	35	His routine is the same every day. Before going	1	0	1	1	1	TRUE	major_paper	NYTIMES.COM	-0.5469	0.00582833188005734	0.0220754678053431	0.0407251274605676	0.0466752632625096	0.00988889704302322	0.558681491878429	0.314392089599112	0.00173333107095784	6	0.558681491878429
1122	NEW YORK TIMES	The New York Times	Newspaper	Section B	NA	August 26, 2003	2003	8	188	Hundreds of people lined up yesterday on the Low	1	0	1	1	1	TRUE	major_paper	NYTIMES.COM	-0.5469	0.00581102082183451	0.56065155696141	0.102450918697176	0.0298035656931034	0.0386623455221404	0.152798190256236	0.105212906106399	0.00460949594170139	2	0.56065155696141
1123	NEW YORK TIMES	The New York Times	Newspaper	Section A	NA	February 12, 2014	2014	2	50	MADISON, Wis. -- Three years after stripping pu	1	0	1	1	1	TRUE	major_paper	NYTIMES.COM	-0.5469	0.549406168432182	0.0703297283713636	0.0419385555929937	0.164133805242004	0.0440802290912347	0.0107909623372148	0.0793447002825476	0.0399758506504589	1	0.549406168432182
1124	NEW YORK TIMES	The New York Times	NA	Section B	NA	January 21, 1999	1999	1	229	Even as Federal officials criticized New York Ci	1	0	1	1	1	TRUE	major_paper	NYTIMES.COM	-0.5469	0.00569984221809105	0.719584185778822	0.231423872515081	0.00584495810362464	0.00434014688857227	0.0189674905937227	0.0101275952758456	0.00401190862624091	2	0.719584185778822
1125	NEW YORK TIMES	The New York Times	Newspaper	Section A	NA	November 16, 2012	2012	11	83	Carlos Castro does not remember the last thing	1	0	1	1	1	TRUE	major_paper	NYTIMES.COM	-0.5469	0.00319375618901228	0.0501930255969857	0.018216964114335	0.00499065210355258	0.0162911836690686	0.809795382750239	0.096768814847737	0.000550220729069149	6	0.809795382750239
1126	NEW YORK TIMES	The New York Times	NA		NA	March 18, 1994	1994	3	291	DATELINE: WASHINGTON, March 17 The Senate Budg	1	0	1	1	1	TRUE	major_paper	NYTIMES.COM	-0.5469	0.056585558115906	0.0124660364171304	0.0174072825431901	0.0371377811949701	0.00193227805459084	0.00290361785783549	0.0645703873488158	0.806997058467561	8	0.806997058467561
1127	NEW YORK TIMES	The New York Times	Editorial	Section A	NA	December 14, 2005	2005	12	168	Strange things are afoot as Congress presses to	1	0	1	1	1	TRUE	major_paper	NYTIMES.COM	-0.5469	0.144893502287071	0.0120288096086107	0.0449171619696572	0.0220256921273576	0.00201052912991982	0.00438941480141778	0.0749089808374444	0.694825909238521	8	0.694825909238521
1128	NEW YORK TIMES	The New York Times	Editorial	Section A	NA	February 21, 2015	2015	2	38	Half a million low-wage workers will get a raise	1	0	1	1	1	TRUE	major_paper	NYTIMES.COM	-0.5469	0.0444924066076925	0.169605405849968	0.0306112851808688	0.685403999944891	0.00407045181945976	0.00358161315215218	0.0166714229161671	0.0455634145288001	4	0.685403999944891
1129	NEW YORK TIMES	The New York Times	Newspaper		NA	August 20, 2004	2004	8	176	DATELINE: SARASOTA, Fla., Aug. 19 As one of on	1	0	1	1	1	TRUE	major_paper	NYTIMES.COM	-0.5469	0.0199905879120436	0.19668490497005	0.046836655837374	0.029889742964752	0.207063600653662	0.365860236418286	0.122010009796744	0.011664261447088	6	0.365860236418286
1130	NEW YORK TIMES	The New York Times	Newspaper	Section A	NA	November 29, 2009	2009	11	119	This is the most urgent time for our feeding prog	1	0	1	1	1	TRUE	major_paper	NYTIMES.COM	-0.5469	0.0692838187976948	0.0663497115644854	0.223714829602195	0.359551623629069	0.00693043280935624	0.0469803717640204	0.147948581561737	0.0792406302714409	4	0.359551623629069
1131	NEW YORK TIMES	The New York Times	Newspaper	Section A	NA	March 9, 2015	2015	3	39	MEMPHIS -- When it came time to have the baby,	1	0	1	1	1	TRUE	major_paper	NYTIMES.COM	-0.5469	0.0384748251251819	0.0190927553322694	0.242379960595776	0.159729452042654	0.0183663609827528	0.324063620152093	0.190185279078682	0.0077077466905905	6	0.324063620152093
[truncated: 10,853 more rows]
